# Supplementary material for: Vaccination induces rapid protection against bacterial pneumonia via training alveolar macrophage in mice
Source: eLife. 2021 Sep 20;10:e69951. doi: 10.7554/eLife.69951 (PMC8455131; doi:10.7554/eLife.69951)
Supplement: Figure 1—source data 1. [file elife-69951-fig1-data1.xlsx]

## Sheet: Figure 1B
Survival data
died： 1
live：0
day	Control	IWC-2d	IWC-7d
2	1
2	1
2	1
2	1
2	1
7		0	0
7		0	0
7		0	0
7		0	0
7		0	0

## Sheet: Figure 1C
Figure 1C Bacterial burdens-lung
	Control	IWC-2d	IWC-7d
	182000000	205000	4750000
	42500000	90000	5800000
	153000000	10000	8600000
	426000000	150000	1450000
	288000000	275000	12950000
Figure 1C Bacterial burdens-blood
	Control	IWC-2d	IWC-7d
	6200000	780	1000
	17700000	720	4800
	13350000	380	3800
	7100000	180	1400
	8450000	520	2200

## Sheet: Figure 1E
Lung	IL-6			TNF			IL1b
	Control	IWC		Control	IWC		Control	IWC
	16	4.15		5.82	3.21		23.88	22.48
	16.7	6.067		3.2	4.55		23.68	21.6
	16.5	5.4		6.28	2.33		23.52	21.68
	16.25	5.9		4.21	3.01		24.24	24.01
	16.5			3.58			22.68

## Sheet: Figure 1F
Blood	IL-6			TNF			IL1b
	Control	IWC		Control	IWC		Control	IWC
	14.3667	0.366667		1.03529	0.294118		2.03	1.96
	12.0569	0.466667		0.882353	0.352941		1.82	3.02
	12.4833	0.233333		0.647059	0.529412		2.36	2.08
	12.6582	0.316667		0.694118	0.435294		2.3	2.32

## Sheet: Figure 1G
Chemokine
	Cxcl1			Cxcl2			Cxcl5			Cxcl10			Ccl2			Ccl7
	Control	IWC		Control	IWC		Control	IWC		Control	IWC		Control	IWC		Control	IWC
	1120.08	135.11		1270.13	201.02		316.39	77.07		204.06	61.07		207.82	106.9		20.07	32.79
	945.01	76.9		1232.26	134.17		305.76	238.78		246.63	41.12		162.03	75.24		27.4	30.034
	1034.03	74.55		985.32	115.59		298.35	81.33		145.25	30.013		112.91	46.91		25.73	28.46
	2005.34	86.54		1256.17	84.73		478.8	119.26		374.52	64.79		371.88	77.25		32.54	26.61
	593.82	134.64		824.87	283.1		284.34	169.92		249.91	56.14		213.17	76.5		37.83	34.55

## Sheet: Figure 1H
cell number (*10^4)
Neutrophil number				macrophage number				monocyte number
Control	IWC			Control	IWC			Control	IWC
192.304	117.803			14.7	14.853			17.451	11.905
172.116	128.917			9.37	15.398			12.051	16.642
182.625	147.986			20.477	17.176			12.007	10.866
163.879	152.259			10.89	19.3			14.258	18.017
