# Supplementary material for: Vaccination induces rapid protection against bacterial pneumonia via training alveolar macrophage in mice
Source: eLife. 2021 Sep 20;10:e69951. doi: 10.7554/eLife.69951 (PMC8455131; doi:10.7554/eLife.69951)
Supplement: Figure 2—source data 1. [file elife-69951-fig2-data1.xlsx]

## Sheet: Figure 2A
Surviva ldata： dead=1, live=0
SJZ24 challenge						SJZ26 Challenge
Day	control	LAC-4-IWC			day	control	LAC-4-IWC
1	1				2	1
2	1				2	1
2	1				2	1
2	1				2	1
2	1				2	1
2	1				2	1
2	1				7	0
2	1				7	0
2	1				7	0
2	1				7	0
7		0			7		0
7		0			7		0
7		0			7		0
7		0			7		0
7		0			7		0
7		0			7		0
7		0			7		0
7		0			7		0
7		0			7		0
7		0			7		0

## Sheet: Figure 2B
Surviva ldata： dead=1, live=0
IWC(SJZ24)to LAC-4 challenge					IWC(SJZ26) to LAC-4 challenge					IWC(SJZ09) to LAC-4 challenge					IWC(ATCC17978) to LAC-4 challenge
day	control	SJZ24-IWC			day	control	SJZ26-IWC			day	control	SJZ09-IWC			day	control	ATCC17978-IWC
2	1				2	1				2	1				2	1
2	1				2	1				2	1				2	1
2	1				2	1				2	1				2	1
2	1				2	1				2	1				2	1
2	1				2	1				2	1				2	1
2	1				2	1				2	1				2	1
2	1				2	1				2	1				2	1
2	1				2	1				2	1				2	1
2	1				2	1				2	1				2	1
2	1				2	1				2	1				2	1
2		1			7		0			7		0			7		0
7		0			7		0			7		0			7		0
7		0			7		0			7		0			7		0
7		0			7		0			7		0			7		0
7		0			7		0			7		0			7		0
7		0			7		0			7		0			7		0
7		0			7		0			7		0			7		0
7		0			7		0			7		0			7		0
7		0			7		0			7		0			7		0
7		0			7		0			7		0			7		0
