# Supplementary material for: Vaccination induces rapid protection against bacterial pneumonia via training alveolar macrophage in mice
Source: eLife. 2021 Sep 20;10:e69951. doi: 10.7554/eLife.69951 (PMC8455131; doi:10.7554/eLife.69951)
Supplement: Figure 3—source data 1. [file elife-69951-fig3-data1.xlsx]

## Sheet: Figure 3 A
day	IL-6 protein level （pg/ml)					day	TNF protein level （pg/ml)
0	5.40541	2.97297	5.94595			0	12.05	10.55	17.05
1	180.541	51.6216	94.3243			1	247.05	86.05	122.55
2	238.919	248.919	109.73			2	179.55	147.05	66.05
3	47.5676	39.7297	196.216			3	39.55	27.05	93.05
4	31.3514	45.6757	0			4	23.55	11.55	15.5
5	5.13514	5.67568	0			5	8.55	14.05	1.05
6	3.51351	1.89189	0.810811			6	5.55	8.05	3.05
7	3.78378	15.9459	2.43243			7	12.05	10.55	16.05

## Sheet: Figure 3B
TNF					IL-6					IL1b
0h		2hpi			0h		2hpi			0h		2hpi
control	IWC	control	IWC		control	IWC	control	IWC		control	IWC	control	IWC
0.511765	0.4	2.57647	4.62941		0.0166667	0.125	1.40833	1.45		0.04	0.12	6.22	5.9
0.517647	0.682353	2.77059	3.31765		0.166667	0.0833333	0.866667	0.9		0.06	0.03	6.54	6.5
0.368	0.421	2.23529	3.74118		0.053	0.041	0.7	0.691667		0.04	0.06	4.26	7.56
		2.57059	3.6				1.925	0.55				4.28	6.1

## Sheet: Figure 3C
Cxcl1					Cxcl2					Cxcl5					Cxcl10					Ccl2
0h		2hpi			0h		2hpi			0h		2hpi			0h		2hpi			0h		2hpi
control	IWC	control	IWC		control	IWC	control	IWC		control	IWC	control	IWC		control	IWC	control	IWC		control	IWC	control	IWC
1.02957	0.62397	352.295	747.61		1.0421	0.98967	261.678	412.944		0.77304	0.46167	165.179	622.844		0.82968	0.38244	21.2001	29.5416		0.49396	1.7477	39.6388	48.6681
1.08835	1.06223	199.158	683.231		0.90419	1.74287	320.412	588.299		0.79563	1.09542	85.6306	750.346		0.88942	0.87827	21.5967	66.624		1.40282	1.17898	28.7123	82.8315
1	1.09705	217.781	752.55		1	1.93297	535.117	914.872		1	1.34008	11.3815	855.189		1	1.04195	8.69336	77.7052		1.41663	1	11.4629	151.876
		289.058	675.653				228.546	749.72				60.1	578.874				22.1717	53.8024				47.3561	172.633

## Sheet: Figure 3D
neutrophil number						Monocyte number					macrophage number
0h		4hpi				0h		4hpi			0h		4hpi
control	IWC	control	IWC			control	IWC	control	IWC		control	IWC	control	IWC
12.366	10.826	19.412	73.462			3.923	4.462	8.358	14.838		20.611	24.631	21.218	33.082
10.997	11.606	50.922	80.53			4.237	2.845	7.528	19.661		18.237	19.663	19.758	20.291
11.679	14.7	30.012	99.778			3.735	4.083	9.312	15.232		22.973	17.492	18.295	22.177
		19.263	73.046					8.693	21.982				22.44	23.188
