# Supplementary material for: Vaccination induces rapid protection against bacterial pneumonia via training alveolar macrophage in mice
Source: eLife. 2021 Sep 20;10:e69951. doi: 10.7554/eLife.69951 (PMC8455131; doi:10.7554/eLife.69951)
Supplement: Figure 4—source data 1. [file elife-69951-fig4-data1.xlsx]

## Sheet: Figure 4A
WT mice survival data: died:1,survived:0						Rag1 -/- mice survival data: died:1,survived:0
day	Control	IWC				day	Control	IWC
2	1					2	1
2	1					2	1
2	1					2	1
2	1					2	1
2	1					2	1
7		0				2	1
7		0				2	1	1
7		0				2	1	1
7		0				7	0	0
7		0				7	0	0
						7		0
						7		0
						7		0
						7		0
						7		0
						7		0

## Sheet: Figure 4E
	Il6			Cxcl1			Cxcl2			Cxcl10			Ccl2			TNf
	Control	IWC		Control	IWC		Control	IWC		Control	IWC		Control	IWC		Control	IWC
	56.538	21.6442		54.987	46.7534		260.293	86.5183		557.054	209.797		260.293	86.5183		65.7317	32.187
	79.2405	6.30779		114.754	16.8168		576.036	143.253		404.149	95.4507		576.036	143.253		110.335	87.5434
	110.816	2.3515		199.635	7.27603		395.693	26.4315		381.863	107.416		395.693	26.4315		55.3476	49.9422
