# Supplementary material for: Vaccination induces rapid protection against bacterial pneumonia via training alveolar macrophage in mice
Source: eLife. 2021 Sep 20;10:e69951. doi: 10.7554/eLife.69951 (PMC8455131; doi:10.7554/eLife.69951)
Supplement: Figure 4—source data 2. [file elife-69951-fig4-data2.xlsx]

## Sheet: ALL samples rpKm 
Geneid	Chr	Start	End	Strand	Length	Control_1	Control_2	Contro1_3	IWC- 2d_1	IWC- 2d_2	IWC- 7d_1	IWC- 7d_2	IWC- 7d_3	control+infection-1	control+infection-2	IWC- 7d+ infection_1	IWC- 7d+ infection_2	IWC- 7d+ infection_3
-343C11.2	10	30879749	30880888	-	1140	0	0	0	0	0	0	0	0	0	0	0	0	0
00R_AC107638.2	7	101238218	101239278	+	1061	3.18691	1.86306	1.84473	1.33045	1.86773	2.89388	3.09284	1.39512	2.2933	2.5839	1.95641	2.51901	1.35946
00R_Pgap2	7;7;7;7;7	102235854;102236094;102236448;102237122;102237401	102235872;102236346;102236542;102237230;102237530	+;+;+;+;+	606	12.8675	13.3194	11.7618	13.6566	12.6069	13.1883	11.9778	9.55803	7.85109	5.00866	12.302	12.4877	13.1653
0610005C13Rik	7;7;7;7;7;7;7;7;7;7;7;7;7;7;7;7;7;7;7;7;7;7;7;7;7;7;7;7;7;7;7;7;7;7;7;7;7;7;7;7;7;7;7;7;7;7	45567794;45567935;45568101;45568124;45568174;45568220;45569086;45570148;45570175;45570986;45570986;45570986;45570986;45570986;45570986;45570986;45570988;45574073;45574413;45574413;45574413;45574413;45574413;45574413;45574413;45574413;45574413;45574608;45574608;45574608;45574608;45574608;45574608;45574608;45574608;45574608;45575127;45575127;45575127;45575127;45575127;45575127;45575127;45575127;455…	45568379;45568379;45568379;45568379;45568379;45568379;45571192;45570555;45570282;45571038;45571192;45571185;45571192;45571192;45571192;45571192;45571192;45574522;45574522;45574522;45574522;45574522;45574522;45574522;45574522;45574522;45574522;45574682;45574777;45574777;45574777;45574777;45574807;45574777;45574846;45574777;45575194;45575138;45575156;45575173;45575156;45575157;45575327;45575157;455…	-;-;-;-;-;-;-;-;-;-;-;-;-;-;-;-;-;-;-;-;-;-;-;-;-;-;-;-;-;-;-;-;-;-;-;-;-;-;-;-;-;-;-;-;-;-	3583	1.38667	1.76235	1.69341	1.4214	1.57189	1.56265	1.6127	0.610704	0.43656	0.382572	1.29997	1.84388	1.86186
0610006L08Rik	7;7;7;7;7	74818818;74823615;74852452;74853547;74853547	74819353;74824844;74852546;74853810;74853813	-;-;-;-;-	2128	0	0	0	0	0	0	0	0	0	0	0	0	0
0610007P14Rik	12;12;12;12;12;12;12;12;12;12;12;12;12;12;12;12	85815448;85815659;85816316;85816316;85819097;85819332;85819479;85819539;85822088;85822088;85822088;85823299;85824471;85824471;85824471;85824471	85816193;85816193;85816434;85816434;85822248;85819569;85819569;85819569;85822250;85822248;85822248;85823434;85824550;85824522;85824544;85824512	-;-;-;-;-;-;-;-;-;-;-;-;-;-;-;-	4235	3.94322	4.31749	4.19027	3.46392	3.18927	3.55396	4.43013	2.15031	2.05194	2.11544	3.71194	3.3611	3.11495
0610009B22Rik	11;11;11;11	51685386;51685386;51688548;51688690	51686092;51686092;51688653;51688874	-;-;-;-	998	5.04755	6.16208	6.53726	4.27106	3.50098	4.64501	5.57543	4.12713	1.6544	1.17729	4.41348	4.87462	4.5767
0610009E02Rik	2;2;2;2;2;2;2;2	26445696;26445924;26445942;26457673;26457673;26457673;26458416;26459222	26446200;26446200;26446200;26457780;26457812;26457995;26459379;26459390	+;+;+;+;+;+;+;+	1803	16.5914	19.2012	17.7488	15.6278	15.0691	17.6472	17.7848	11.9934	13.9049	12.7887	18.5328	23.0513	12.3165
0610009L18Rik	11;11	120348678;120350757	120348862;120351190	+;+	619	3.00997	2.48375	2.84577	1.07316	0.84247	2.33425	2.5354	2.23535	1.96542	2.21447	1.55401	1.55244	2.33019
0610009O20Rik	18;18;18;18;18;18;18;18;18;18;18;18;18	38250249;38251086;38251283;38252821;38253908;38254280;38254470;38257258;38258028;38258270;38259897;38261064;38261880	38250399;38251200;38251400;38252965;38254069;38254368;38254566;38257400;38258186;38258362;38260056;38261285;38262629	+;+;+;+;+;+;+;+;+;+;+;+;+	2404	15.8307	17.8955	15.3606	10.5925	11.3886	14.3749	16.9885	6.85337	4.5185	5.62053	10.1509	9.24386	8.79991
0610010F05Rik	11;11;11;11;11;11;11;11;11;11;11;11;11;11;11;11;11;11;11;11;11;11;11;11;11;11;11;11;11;11;11;11;11;11;11;11;11;11;11;11;11;11;11;11;11;11;11;11;11;11;11;11;11;11;11;11;11;11;11;11;11;11;11;11;11;11;11;11;11;11;11;11;11;11;11;11;11;11;11;11;11;11;11;11;11;11;11;11;11;11;11;11;11;11;11;11;11;11;11;11;11;11;11;11;11;11;11;11;11;11;11;11;11;11;11;11;11;11;11;11;11;11;11;11;11;11;11;11	23564961;23566119;23573251;23573788;23573788;23573903;23576630;23576731;23576731;23576731;23576731;23576731;23581596;23581596;23581596;23581596;23581596;23581596;23582867;23582867;23582867;23582867;23582867;23582867;23583098;23583098;23583098;23583098;23583098;23583098;23584520;23584520;23584520;23584520;23584520;23584520;23588635;23588635;23588635;23588635;23588635;23588635;23589951;23589951;235…	23565136;23566195;23575517;23575517;23575517;23575517;23576822;23576822;23576822;23576822;23576822;23576822;23581684;23581684;23581684;23581684;23581684;23581684;23582940;23582940;23582940;23582940;23582940;23582940;23583126;23583126;23583126;23583126;23583126;23583126;23584611;23584611;23584611;23584611;23584611;23584611;23588734;23588734;23588734;23588734;23588734;23588734;23589983;23589983;235…	-;-;-;-;-;-;-;-;-;-;-;-;-;-;-;-;-;-;-;-;-;-;-;-;-;-;-;-;-;-;-;-;-;-;-;-;-;-;-;-;-;-;-;-;-;-;-;-;-;-;-;-;-;-;-;-;-;-;-;-;-;-;-;-;-;-;-;-;-;-;-;-;-;-;-;-;-;-;-;-;-;-;-;-;-;-;-;-;-;-;-;-;-;-;-;-;-;-;-;-;-;-;-;-;-;-;-;-;-;-;-;-;-;-;-;-;-;-;-;-;-;-;-;-;-;-;-;-	5226	4.66776	5.31644	4.79389	4.7773	3.17324	6.17478	5.48746	4.16242	4.15709	5.56442	5.60921	4.49359	5.25553
0610010K14Rik	11;11;11;11;11;11;11;11;11;11;11;11;11;11;11;11;11;11;11;11;11;11;11;11;11;11;11;11;11;11;11;11;11;11;11;11;11;11;11;11;11;11;11;11;11;11;11;11;11;11;11;11;11;11;11;11;11;11;11;11	70235206;70235206;70235206;70235206;70235206;70235206;70235206;70235208;70235362;70235371;70235379;70235404;70235696;70235696;70235696;70235696;70235736;70235997;70236024;70236024;70236024;70236024;70236024;70236024;70236024;70236024;70236024;70236024;70236024;70236024;70236454;70236877;70236877;70236877;70236877;70236877;70236888;70236888;70237260;70237531;70237531;70237531;70237531;70237531;702…	70235464;70235468;70235464;70235468;70235468;70235800;70235464;70235464;70235468;70235468;70235468;70235468;70235800;70235800;70235800;70235760;70235800;70236211;70236211;70236211;70236211;70236211;70236211;70236211;70236211;70236211;70236211;70236211;70236196;70236211;70236978;70236978;70236978;70236978;70236978;70236904;70236978;70236978;70237489;70237625;70237625;70237625;70237625;70237678;702…	-;-;-;-;-;-;-;-;-;-;-;-;-;-;-;-;-;-;-;-;-;-;-;-;-;-;-;-;-;-;-;-;-;-;-;-;-;-;-;-;-;-;-;-;-;-;-;-;-;-;-;-;-;-;-;-;-;-;-;-	1896	5.16819	5.459	5.26477	4.14596	5.73473	4.36607	4.81599	2.63064	2.42916	2.53041	4.01874	3.92798	3.29659
0610012D04Rik	17;17	87362239;87364332	87362638;87364462	-;-	531	2.20924	2.37834	1.59726	3.44029	2.45522	3.7415	2.55255	0.606002	1.63653	1.65951	1.43017	2.60147	4.64044
0610012G03Rik	16	31947050	31948494	-	1445	6.82899	7.29581	6.23071	5.70813	5.81036	8.08276	7.20774	4.98825	3.42788	2.91362	5.22048	5.52802	7.94393
0610025J13Rik	4;4;4;4;4;4;4;4	98321398;98321448;98321448;98322309;98322309;98322309;98331323;98331323	98321507;98321507;98321507;98322492;98322850;98322486;98331791;98331791	+;+;+;+;+;+;+;+	1121	0.246231	0.195927	0.174599	0	0	0.0537057	0	0	0.0775198	0	0	0	0
0610030E20Rik	6;6;6;6;6;6;6;6;6;6	72347317;72347326;72347334;72347367;72347593;72348529;72348529;72348529;72348997;72348997	72351216;72347711;72347515;72347711;72347711;72348680;72348680;72349175;72353148;72350617	+;+;+;+;+;+;+;+;+;+	5832	7.90993	8.95842	8.33422	8.7801	7.53798	9.76562	8.21378	4.24856	4.78306	4.96943	7.08378	8.03273	8.0792
0610031O16Rik	3;3;3;3;3;3;3;3;3;3;3;3;3;3	138210716;138217793;138226560;138229068;138237601;138237601;138237601;138237601;138239222;138239489;138239489;138239489;138239489;138240332	138211252;138217900;138226952;138229950;138237713;138237713;138237713;138237713;138239404;138239679;138239663;138239664;138239663;138240405	-;-;-;-;-;-;-;-;-;-;-;-;-;-	2482	0.222421	0.553068	0.105144	0.289946	0.0840433	0.19405	0.143709	0	0.035012	0.078897	0	0.0241983	0.0242141
0610033M10Rik	6;6;6;6;6	51400966;51401205;51401477;51401742;51402186	51402033;51401314;51401580;51402033;51402219	-;-;-;-;-	1102	0	0.0498263	0.118406	0	0	0.109263	0	0	0.0788564	0.0888487	0	0	0
0610037L13Rik	4;4;4;4;4;4;4;4;4;4;4;4;4;4;4;4;4;4;4;4;4;4;4;4;4;4;4;4;4;4;4;4;4;4;4;4;4;4;4;4;4;4;4;4;4;4;4;4;4;4;4;4;4;4;4;4;4;4;4;4;4;4;4;4;4;4;4;4;4;4;4;4;4;4;4;4;4;4;4;4;4;4;4;4;4;4;4;4;4;4	107889813;107889825;107889849;107889863;107889866;107889869;107889898;107889899;107889908;107890119;107890119;107890119;107890119;107890119;107890119;107890119;107890119;107890227;107890240;107891465;107891465;107891465;107891465;107891465;107891465;107891465;107891465;107891465;107891465;107891465;107891955;107891955;107891955;107891955;107891955;107891955;107891955;107891955;107891955;107891960…	107889896;107889896;107889896;107889896;107889896;107889896;107890202;107890202;107890013;107890202;107890202;107890202;107890202;107890202;107890202;107890202;107890202;107890549;107890549;107891521;107891521;107891521;107891521;107891521;107891521;107891521;107891521;107891521;107891521;107891521;107892036;107892036;107892036;107892003;107892036;107892036;107892036;107892036;107892036;107892036…	+;+;+;+;+;+;+;+;+;+;+;+;+;+;+;+;+;+;+;+;+;+;+;+;+;+;+;+;+;+;+;+;+;+;+;+;+;+;+;+;+;+;+;+;+;+;+;+;+;+;+;+;+;+;+;+;+;+;+;+;+;+;+;+;+;+;+;+;+;+;+;+;+;+;+;+;+;+;+;+;+;+;+;+;+;+;+;+;+;+	5633	5.63516	5.57079	4.95134	4.79574	4.74922	6.31112	5.81283	3.18759	2.97739	3.58063	3.90968	3.65894	3.95826
0610038B21Rik	8;8;8	77517056;77518115;77522352	77518579;77518254;77523898	+;+;+	3071	1.57292	1.29628	1.01974	1.69443	1.81697	1.70555	1.48667	0.77539	0.565938	0.542003	1.03861	0.821401	2.23098
0610039K10Rik	2;2	163644850;163644850	163645800;163645801	+;+	952	52.1896	45.6802	45.916	36.3428	35.8797	40.8528	39.565	53.541	30.3054	32.4999	85.3021	84.7907	40.3398
0610040B10Rik	5;5;5;5;5;5	143329247;143329308;143329327;143330704;143332311;143332311	143329353;143330950;143329353;143330885;143332704;143332701	+;+;+;+;+;+	2098	0.624938	0.575781	0.248777	0.369401	0.42256	0.573919	0.340023	0.920268	0.911246	1.02671	0.868739	0.715683	0.257814
0610040F04Rik	6;6;6;6;6;6;6;6;6;6;6	108577039;108578516;108582023;108582542;108610333;108612308;108613132;108613132;108613949;108613949;108660817	108578012;108578590;108582248;108582754;108610621;108612432;108613214;108613214;108613995;108613993;108660934	-;-;-;-;-;-;-;-;-;-;-	2150	1.34803	1.7111	2.51864	4.58307	4.09914	2.9962	1.72536	11.1952	19.3605	13.8897	8.90114	13.5764	7.91075
0610040J01Rik	5;5;5;5;5;5;5;5;5;5;5;5;5;5;5	63812363;63812520;63876309;63876450;63876450;63877476;63888045;63896430;63896430;63896430;63896430;63897955;63897955;63897955;63897955	63812595;63812595;63876499;63876499;63876499;63877587;63888186;63896483;63896483;63896483;63896483;63898567;63898266;63898529;63899625	+;+;+;+;+;+;+;+;+;+;+;+;+;+;+	2403	3.99162	5.21551	4.61553	4.37699	2.92971	5.0358	3.97801	7.39186	13.6335	12.0606	8.00612	6.0235	6.21502
0610043K17Rik	4;4;4;4;4;4;4;4	101353783;101366651;101366990;101366990;101374258;101374258;101390943;101398890	101353888;101366675;101367139;101367139;101374323;101374323;101391073;101399181	+;+;+;+;+;+;+;+	770	4.43612	4.99169	3.135	2.80381	3.9281	3.44023	3.52052	3.86562	2.48285	2.92462	2.30128	4.99201	3.90256
1010001B22Rik	5;5	109995511;109996119	109995819;109996398	-;-	589	0.234317	0.466117	0.443069	0.187971	0	0.306642	0.484461	0	0	0	0	0	0.102036
1010001N08Rik	18;18;18;18;18;18	11049087;11049931;11050624;11051258;11051258;11052475	11050821;11050256;11050821;11051489;11051368;11052567	-;-;-;-;-;-	2060	2.8306	1.11949	1.64688	0.671812	0.60756	1.34436	2.07777	0.874761	0.674949	0.570357	1.32715	0.874662	1.34202
1110002E22Rik	3;3;3;3	138065052;138071597;138077164;138077164	138070449;138071853;138077371;138081506	+;+;+;+	9998	0.03451	0.0384437	0.013051	0.0830526	0.0365115	0.15054	0.0713512	0.0708073	0.173834	0.323172	0.0506383	0.0360433	0.150278
1110002J07Rik	10;10;10;10	66912489;66915856;66918379;66919928	66913672;66915959;66918995;66920258	-;-;-;-	2236	0.0308615	0.0491132	0.0291779	0.64369	0.629705	0.188474	0.0638076	0.259041	0.582959	0.394097	0.407561	0.886397	1.102
1110002L01Rik	12;12;12;12;12;12;12;12;12;12;12;12	3403878;3405310;3406706;3407224;3407644;3407644;3407701;3423100;3426501;3426501;3426501;3426501	3406711;3406711;3406711;3407924;3407924;3407924;3407924;3423184;3426714;3426740;3426747;3427011	-;-;-;-;-;-;-;-;-;-;-;-	4131	4.17612	4.36637	4.12993	2.7806	2.56263	4.18995	4.34307	0.794536	0.694188	0.924362	1.58098	2.33349	2.74237
1110002O04Rik	1;1	35879845;35880682	35879972;35881119	+;+	566	0.365758	0	0.115268	0.0978045	0	0	0	0	0	0	0	0	0
1110003F10Rik	5	65405751	65406517	+	767	1.07963	1.2886	0.850611	0.793912	0.475935	0.941915	1.39512	1.34253	1.13298	1.65951	0.792096	0.626442	0.626851
1110004E09Rik	16;16;16;16;16;16;16;16;16;16;16;16;16;16;16;16;16;16;16;16;16;16;16;16;16;16;16;16;16	90925809;90925953;90925970;90926345;90926345;90927098;90927098;90927098;90927119;90927182;90927350;90927350;90927350;90927350;90927350;90927380;90929916;90929916;90929916;90929916;90930994;90930994;90930994;90930994;90934390;90934582;90934582;90934582;90934582	90926082;90926082;90926082;90926440;90926440;90927229;90927229;90927229;90927229;90927229;90927508;90927508;90927508;90927508;90927508;90927508;90929983;90929983;90929983;90929983;90931110;90931161;90931161;90931161;90934506;90934826;90934723;90934927;90934827	-;-;-;-;-;-;-;-;-;-;-;-;-;-;-;-;-;-;-;-;-;-;-;-;-;-;-;-;-	1360	10.5032	13.8079	7.36369	10.2167	7.2855	9.38476	7.44841	5.96252	9.87207	8.85521	9.53001	6.49179	5.54593
1110004F10Rik	7;7;7;7;7;7;7;7;7;7;7;7;7;7;7;7;7;7;7;7;7;7;7;7;7;7;7;7;7;7;7	116039397;116039712;116081358;116081358;116088274;116088274;116093025;116093301;116093336;116093341;116093366;116097762;116099440;116099440;116099440;116099440;116099440;116101944;116101944;116101944;116101944;116101944;116103195;116103211;116103211;116103211;116103211;116104212;116104212;116104212;116104212	116039771;116039771;116081412;116081412;116088414;116088414;116093256;116093525;116093387;116093387;116093525;116097953;116099523;116099523;116099523;116099523;116099523;116102004;116102004;116102004;116102004;116101991;116103320;116103320;116103320;116103320;116103316;116105210;116105207;116104831;116105210	+;+;+;+;+;+;+;+;+;+;+;+;+;+;+;+;+;+;+;+;+;+;+;+;+;+;+;+;+;+;+	2490	9.07613	9.89016	10.7033	8.05905	7.65478	9.13942	10.2565	11.2561	7.27654	7.90368	12.7282	10.215	9.67865
1110006O24Rik	5	115631049	115631816	-	768	0.44926	0.142991	0.424752	0.360399	0.203707	0.313563	0.185773	0.502792	0.792055	0.509954	0.527377	0.391016	0.391272
1110008E08Rik	16;16	90554164;90554164	90554884;90554886	+;+	723	0	0	0	0	0	0	0	0	0	0	0	0	0
1110008F13Rik	2;2;2;2;2;2;2;2;2;2;2	156863128;156863139;156863145;156865257;156865257;156872338;156872338;156872542;156873043;156873043;156873043	156863417;156863417;156863417;156866987;156865360;156872467;156872467;156872740;156873396;156873398;156873563	+;+;+;+;+;+;+;+;+;+;+	2871	8.82107	10.232	9.49881	14.7311	12.0791	10.7784	11.5044	12.4859	13.6055	11.7316	12.9436	13.2003	13.5229
1110008L16Rik	12;12;12;12;12;12;12;12;12;12;12;12;12;12;12;12;12;12;12;12;12;12;12;12;12;12;12;12;12;12;12;12;12;12;12;12;12;12	55299577;55302637;55302750;55303243;55303261;55303286;55303616;55303616;55306339;55306339;55306339;55306339;55306339;55308737;55308737;55308737;55308737;55308737;55338160;55338160;55338160;55338160;55338160;55377114;55377114;55377114;55377114;55377114;55379282;55379282;55379282;55379282;55379282;55382257;55382257;55382257;55382257;55382257	55299666;55304884;55304884;55303332;55303332;55303337;55304884;55304884;55306386;55307589;55306386;55306386;55306386;55308869;55308869;55308869;55308869;55308869;55338267;55338267;55338267;55338267;55338267;55377262;55377262;55377262;55377262;55377262;55379477;55379477;55379477;55379477;55379477;55382533;55382513;55382513;55382496;55382420	+;+;+;+;+;+;+;+;+;+;+;+;+;+;+;+;+;+;+;+;+;+;+;+;+;+;+;+;+;+;+;+;+;+;+;+;+;+	4452	2.00726	2.34545	2.04914	2.18843	1.59305	2.24481	1.35672	1.18061	1.80553	1.69343	2.19286	1.76727	1.72455
1110008P14Rik	2;2;2;2	32377097;32379101;32381682;32381692	32379533;32379533;32381862;32381938	-;-;-;-	2694	7.63321	6.21645	6.78089	7.08919	6.79445	5.81034	4.88555	6.15146	11.3221	11.3576	8.7669	9.48611	8.67804
1110012L19Rik	X;X;X	70385877;70387894;70388872	70386151;70388166;70389417	+;+;+	1094	5.51924	5.16964	7.24578	4.25047	3.88495	5.8333	6.84678	4.32383	2.46242	2.32696	6.50206	6.09385	5.43861
1110015O18Rik	3;3;3;3;3;3;3;3;3;3	4797558;4798708;4798751;4799477;4799493;4800631;4800631;4812609;4813708;4813708	4797955;4798822;4798821;4799563;4799563;4800757;4800757;4812712;4813975;4814911	+;+;+;+;+;+;+;+;+;+	2035	0	0	0	0	0	0	0	0	0	0	0	0	0
1110017D15Rik	4;4;4;4;4;4;4;4;4;4;4;4;4;4;4;4;4;4;4;4;4;4;4;4;4;4;4;4;4;4;4;4;4;4;4;4;4	41505009;41505009;41505009;41505009;41505009;41505009;41505568;41505568;41505568;41505568;41505568;41505568;41507094;41507099;41507099;41507099;41507125;41507521;41507521;41507521;41507521;41507521;41507521;41507521;41508517;41508517;41508517;41508517;41508534;41508834;41511432;41511432;41511432;41511432;41517028;41517028;41517028	41505168;41505168;41505168;41505168;41505168;41505168;41505654;41505654;41505654;41505654;41505654;41505654;41507328;41507328;41507328;41507269;41507269;41507593;41507593;41507593;41507764;41507593;41507754;41507759;41508629;41508629;41508629;41508629;41508629;41508964;41511576;41511576;41511576;41511467;41517328;41517333;41517333	-;-;-;-;-;-;-;-;-;-;-;-;-;-;-;-;-;-;-;-;-;-;-;-;-;-;-;-;-;-;-;-;-;-;-;-;-	1421	4.80761	9.8534	3.48936	3.31131	1.24776	4.59686	2.76111	1.22284	6.20712	3.89302	4.32887	3.04316	0.592112
1110018N20Rik	2;2;2;2;2;2;2;2;2	167188702;167189107;167189278;167189661;167191292;167191292;167191830;167191830;167191830	167188818;167189406;167189406;167189719;167191415;167191415;167192525;167192808;167192259	+;+;+;+;+;+;+;+;+	1579	0.568133	0.556388	0.454503	0.420702	0.231186	0.495664	0.587321	0.896683	0.495312	0.496067	0.256507	0.228221	0.304493
1110019D14Rik	6;6;6;6;6;6	13871526;13871569;13881273;13881273;13895092;14044194	13871627;13871627;13881381;13881381;13896422;14044385	+;+;+;+;+;+	1734	2.76582	2.5016	2.52088	1.56431	1.32327	2.67342	3.20893	0.630955	0.10023	0.564655	1.28468	1.3162	1.66365
1110020A21Rik	17;17	84954967;84957200	84955308;84957710	-;-	853	0.566288	0.643711	0.611881	0.324486	0.305679	0.352896	0.752676	0.150897	0.101875	0	0.534178	0.281642	0.0704565
1110025L11Rik	16	89063412	89064002	-	591	0	0	0	0	0	0	0	0	0	0	0	0	0
1110025M09Rik	15	81584174	81585028	-	855	2.50198	2.56882	2.67072	1.61864	1.64681	2.18284	2.00244	3.16142	2.84584	2.8629	4.85557	4.21474	4.00662
1110028F11Rik	11;11;11;11	87701396;87702123;87704746;87704746	87701646;87702261;87704989;87705331	+;+;+;+	976	1.55547	1.29395	0.601615	0.907498	0.961762	1.23369	0.950184	0.46158	0.623256	0.200638	0.622477	0.738444	1.41628
1110028F18Rik	8;8;8	106587143;106592875;106594210	106587417;106593329;106594820	+;+;+	1341	0	0	0	0.206403	0.038888	0	0	0.287953	0.194407	0.511095	0.113262	0	0.0896336
1110032A03Rik	9;9;9;9;9;9;9;9;9;9;9;9;9;9;9;9;9;9;9;9;9;9;9;9;9;9;9;9;9;9	50762828;50763701;50763703;50763727;50763730;50763857;50764224;50764224;50764224;50764224;50764224;50764224;50764696;50764696;50764697;50764765;50764811;50765031;50765700;50767702;50767858;50767858;50767858;50767858;50768594;50770801;50770801;50771152;50773985;50774877	50764016;50764016;50764016;50764016;50764016;50764016;50764562;50764290;50764926;50764290;50764290;50764290;50764926;50764926;50764926;50764926;50764926;50765166;50766102;50768098;50768169;50768160;50768121;50768452;50768936;50770948;50770958;50772055;50774046;50775520	-;-;-;-;-;-;-;-;-;-;-;-;-;-;-;-;-;-;-;-;-;-;-;-;-;-;-;-;-;-	5293	4.56304	5.46959	4.41273	3.24216	2.35965	4.00944	3.71982	2.93031	3.2179	3.11695	3.55822	2.77436	2.22548
1110032F04Rik	3	68869586	68872163	+	2578	0.0267674	0.0425978	0.0506143	0.042946	0.0202284	0.046706	0.110686	0.149784	0.168541	0.379795	0.117831	0.186377	0.163187
1110034G24Rik	2;2;2;2;2;2;2;2;2;2;2	132686931;132690157;132690283;132691950;132691950;132691950;132698119;132750213;132750213;132750213;132750213	132686981;132690228;132690728;132692131;132692131;132692131;132698641;132750582;132750503;132751055;132751055	+;+;+;+;+;+;+;+;+;+;+	2117	3.19443	4.22773	2.92772	1.83043	2.41407	2.77274	2.91481	0.744807	0.656776	0.87875	1.99691	1.87245	1.73172
1110035H17Rik	7;7;7;7	29155680;29155680;29155738;29155787	29155733;29156920;29155782;29156918	+;+;+;+	1241	2.16861	1.76982	1.73488	1.38282	2.01704	2.03753	1.66702	0.777889	0.980335	1.34125	1.50946	1.98426	1.50127
1110036E04Rik	9;9;9	64049829;64053189;64053497	64049895;64053294;64054100	+;+;+	777	0	0.212002	0.251899	0.071245	0.134231	0.154965	0	0.082828	0.22368	0.756071	0.521268	0.154595	0
1110037F02Rik	4;4;4;4;4;4;4;4;4;4;4;4;4;4;4;4;4;4;4;4;4;4;4;4;4;4;4;4;4;4;4;4;4;4;4;4;4;4;4;4;4;4;4;4;4;4;4;4;4;4;4;4;4;4;4;4;4;4;4;4;4;4	11485958;11485958;11486043;11494764;11494764;11494764;11498740;11498740;11498740;11501309;11501309;11501309;11505442;11505442;11505442;11506954;11506954;11506954;11507907;11507907;11507907;11513028;11513028;11513028;11516829;11518926;11518926;11518926;11521105;11521105;11521105;11522853;11522853;11522853;11526347;11526347;11526347;11526595;11526595;11526595;11527648;11527648;11528538;11528538;115…	11486105;11486105;11486105;11494879;11494879;11494879;11498826;11498826;11498826;11501357;11501357;11501357;11505610;11505610;11505610;11507076;11507076;11507076;11508179;11508179;11508179;11514168;11514168;11514168;11516978;11519414;11519414;11519414;11521259;11521259;11521259;11522935;11522935;11522935;11526440;11526440;11526440;11527139;11527139;11527621;11527883;11527883;11528790;11528790;115…	+;+;+;+;+;+;+;+;+;+;+;+;+;+;+;+;+;+;+;+;+;+;+;+;+;+;+;+;+;+;+;+;+;+;+;+;+;+;+;+;+;+;+;+;+;+;+;+;+;+;+;+;+;+;+;+;+;+;+;+;+;+	7138	12.3937	12.0387	11.192	12.3697	11.1341	12.6304	12.1726	10.7247	11.2977	10.1094	11.0151	11.3254	11.8422
1110038B12Rik	17;17;17;17;17;17;17;17;17;17;17;17;17;17;17;17;17;17;17;17;17;17;17;17;17;17;17	34950238;34950241;34950241;34950241;34950242;34950243;34950698;34950698;34950698;34950698;34950698;34951446;34951594;34951885;34951885;34951885;34951885;34952136;34952136;34952136;34952136;34952136;34952352;34952352;34952352;34952352;34952352	34950475;34950475;34950475;34950475;34950475;34950475;34950847;34950847;34950847;34951244;34950847;34951925;34952173;34952434;34951925;34951925;34951925;34952173;34952173;34952456;34952173;34952173;34952468;34952462;34952468;34952471;34952448	-;-;-;-;-;-;-;-;-;-;-;-;-;-;-;-;-;-;-;-;-;-;-;-;-;-;-	1811	2.28624	1.78885	1.99941	2.78162	3.03794	2.41016	2.54071	2.06114	2.4712	3.16279	4.57079	5.00777	5.17697
1110038F14Rik	15;15;15;15;15	76948539;76948629;76949068;76949544;76950249	76948544;76948919;76949152;76949690;76950729	+;+;+;+;+	1010	16.0901	15.0863	16.7949	19.7587	23.6993	16.9483	15.8919	11.9794	9.89452	11.0514	18.5971	14.3906	23.5935
1110046J04Rik	13;13;13;13;13;13;13;13	33935567;33935820;33936032;33936512;33953317;33954707;33958601;33959873	33938342;33936097;33936097;33936630;33953541;33954825;33958658;33960181	+;+;+;+;+;+;+;+	3487	5.67961	6.5821	6.08076	4.68323	3.23033	4.36812	6.62838	5.59228	2.86592	2.5271	5.73505	4.51269	3.92964
1110051M20Rik	2;2;2;2;2;2;2;2;2;2;2;2;2;2;2;2;2;2;2;2;2;2;2;2;2;2;2;2;2;2;2;2;2;2;2;2;2;2;2;2;2;2;2	91275068;91277830;91278244;91279190;91279190;91279190;91281742;91281746;91281746;91281746;91282465;91282465;91282465;91282465;91284235;91284235;91284235;91304411;91304749;91304749;91304749;91383729;91383729;91383729;91383729;91383784;91418784;91418833;91421866;91421866;91421866;91421866;91421866;91421866;91424562;91424562;91444569;91444569;91444569;91444569;91444569;91444569;91444569	91277134;91278957;91278957;91279253;91279253;91279253;91281855;91281855;91281855;91281855;91282660;91283141;91282660;91282660;91284320;91284320;91284320;91304833;91304833;91304833;91304833;91383859;91383859;91383859;91383859;91383859;91418918;91418918;91421968;91421968;91421968;91421968;91421968;91421968;91424699;91424699;91444704;91444637;91444643;91444669;91444680;91444642;91444622	-;-;-;-;-;-;-;-;-;-;-;-;-;-;-;-;-;-;-;-;-;-;-;-;-;-;-;-;-;-;-;-;-;-;-;-;-;-;-;-;-;-;-	5202	10.022	10.8719	8.87951	6.67225	7.14766	9.45535	8.1526	7.90549	8.12701	8.99684	7.6059	7.75863	6.90299
1110057P08Rik	16	89174735	89175199	+	465	0	0	0	0	0	0	0	0	0	0	0	0	0
1110059E24Rik	19;19;19;19;19;19;19;19;19;19;19;19;19;19;19;19;19;19;19;19;19;19;19;19;19;19;19;19	21581202;21590579;21597312;21597701;21598170;21598325;21598551;21598755;21598755;21598755;21598814;21598826;21604289;21610606;21615265;21615403;21619109;21619109;21619109;21630510;21630510;21652607;21652607;21652607;21652607;21652607;21652607;21652607	21581630;21590626;21598334;21598334;21598334;21598868;21598868;21598868;21598868;21598868;21598868;21598868;21604319;21610662;21615445;21615445;21619215;21619215;21619215;21630796;21630768;21652793;21652917;21652610;21652917;21652800;21652976;21652728	-;-;-;-;-;-;-;-;-;-;-;-;-;-;-;-;-;-;-;-;-;-;-;-;-;-;-;-	3067	5.3999	5.54994	5.54141	6.06458	4.60787	5.84963	6.69874	5.95941	3.96673	4.21398	5.11729	4.71943	4.84009
1110059G10Rik	9;9;9;9;9;9	122945089;122947535;122948427;122948925;122950805;122950805	122948108;122948108;122950976;122949069;122950953;122951000	-;-;-;-;-;-	5594	1.38161	1.48216	1.51617	0.989584	0.736461	1.67891	1.68332	1.87527	1.13402	1.33022	1.71053	1.07365	1.47186
1110060G06Rik	5	20728394	20728892	+	499	0	0	0	0	0	0	0	0	0	0	0	0	0
1110065P20Rik	4;4;4;4;4;4;4;4;4;4;4;4;4;4;4	124849080;124849485;124849485;124849486;124849490;124849546;124850232;124850232;124850232;124850232;124850232;124850522;124850580;124850649;124850649	124850330;124849962;124849962;124849962;124849962;124849962;124850433;124850473;124850433;124850433;124850433;124850809;124850661;124851196;124850730	-;-;-;-;-;-;-;-;-;-;-;-;-;-;-	2069	3.46866	2.89272	3.84703	2.67556	2.99938	2.58974	2.58592	3.51493	3.94808	3.21796	3.15661	3.22217	3.07904
1190002N15Rik	9;9;9	94517864;94524392;94537219	94520646;94524695;94538081	-;-;-	3950	16.6314	16.7923	18.053	8.91323	6.4427	19.1434	22.7736	3.79627	2.02399	2.52834	3.53756	4.36386	6.93805
1190003K10Rik	13;13;13	64481246;64485858;64497453	64481857;64486002;64497792	-;-;-	1097	0	0	0	0	0	0	0	0	0	0	0	0	0
1190005I06Rik	8;8;8;8;8;8;8;8;8;8;8;8	120608602;120608801;120608935;120611194;120611194;120611194;120628472;120628472;120628472;120634142;120634268;120647520	120609030;120609030;120609030;120611337;120611337;120611337;120628517;120628517;120628517;120634363;120634492;120647632	-;-;-;-;-;-;-;-;-;-;-;-	1083	0.467051	0.253502	0.210846	0.0766722	0.168533	0.250156	0.263479	0.2377	0.12036	0	0.132297	0.0554571	0.0183128
1190007I07Rik	10;10;10;10;10;10;10;10;10;10;10;10;10	82619851;82619851;82619942;82620026;82622361;82622708;82622708;82622708;82622708;82622965;82622965;82623094;82623153	82620217;82620217;82620217;82620217;82622824;82622824;82622824;82622824;82622926;82623137;82623196;82623190;82623228	-;-;-;-;-;-;-;-;-;-;-;-;-	1197	2.59422	2.43121	2.72522	1.57239	1.39412	3.13494	2.20507	0.770461	0.653381	1.22696	1.48036	1.10386	1.60667
1190028D05Rik	8;8;8;8	52356611;52358640;52401467;52402974	52356806;52358745;52401561;52403339	+;+;+;+	763	0	0	0	0	0	0	0	0	0	0	0	0	0
1200007C13Rik	2;2	167827693;167832931	167829431;167833646	-;-	2455	2.58598	2.79575	2.5645	1.39803	2.76145	1.79018	1.04608	11.0627	10.4421	13.3207	7.85716	5.29654	1.64019
1300002E11Rik	16;16;16;16;16;16;16;16;16;16;16;16;16;16;16;16;16;16;16;16;16;16;16;16;16;16;16;16;16;16	21794318;21794342;21794347;21794356;21794362;21794370;21794392;21795850;21795850;21795850;21795850;21795850;21795850;21795850;21800715;21800715;21800715;21800775;21801281;21801281;21801281;21802953;21802953;21802955;21805312;21806971;21808678;21808678;21808678;21808678	21794446;21794446;21794446;21794446;21794446;21794446;21794446;21795975;21795975;21795975;21795975;21795975;21795975;21795975;21800836;21800836;21800836;21800836;21801356;21801356;21801356;21806130;21804238;21803097;21806125;21807119;21809040;21808820;21809040;21809026	+;+;+;+;+;+;+;+;+;+;+;+;+;+;+;+;+;+;+;+;+;+;+;+;+;+;+;+;+;+	4143	4.65538	5.25495	4.81873	3.24688	2.91394	5.0715	4.80401	1.46796	1.04875	1.39434	2.8473	2.49344	4.069
1300017J02Rik	9;9;9;9;9;9;9;9;9;9;9;9;9;9;9;9;9;9;9;9;9;9;9;9;9;9;9;9;9;9;9;9;9;9;9;9;9;9;9;9;9;9;9;9;9;9;9;9;9;9;9;9;9	103250521;103250527;103250624;103251791;103251791;103251791;103251837;103254640;103254640;103254640;103254640;103256565;103256565;103256565;103256565;103257072;103259370;103259370;103259370;103263030;103263030;103263030;103266203;103266203;103266203;103267632;103268312;103269612;103269612;103270793;103272487;103272487;103272487;103274941;103274941;103274941;103277456;103277456;103277456;103279373…	103250662;103250662;103250662;103251977;103251977;103251977;103251977;103254824;103254824;103254824;103254824;103256629;103256629;103257026;103256629;103257083;103259511;103259511;103259511;103263185;103263185;103263185;103266225;103266259;103266259;103267722;103268454;103269783;103269783;103272318;103272665;103272665;103272665;103274996;103274996;103274996;103277603;103277603;103277603;103279534…	-;-;-;-;-;-;-;-;-;-;-;-;-;-;-;-;-;-;-;-;-;-;-;-;-;-;-;-;-;-;-;-;-;-;-;-;-;-;-;-;-;-;-;-;-;-;-;-;-;-;-;-;-	4508	0.0765376	0.158343	0.0434174	0.122798	0.0462723	0.160259	0.031649	0.142763	0.0771071	0.173756	0.0112307	0.0865995	0.0399951
1500002C15Rik	4;4	155732545;155732548	155734727;155734627	-;-	2183	3.38235	2.94288	3.31738	4.15877	3.7744	3.33701	2.48356	3.47878	3.34383	2.96021	3.17731	4.18192	3.6891
1500002F19Rik	7;7;7;7;7;7;7;7	132874739;132874797;132888555;132889572;132893146;132893146;132931008;132931008	132875038;132875038;132888687;132890078;132893254;132893254;132931103;132931197	-;-;-;-;-;-;-;-	1239	4.34422	5.25155	4.31786	4.64662	3.6197	4.30029	4.49094	4.15544	2.38466	2.76585	2.98293	4.60509	4.65661
1500004A13Rik	3;3;3;3;3;3;3;3;3;3;3;3;3;3;3;3;3;3;3;3;3;3;3;3	88782943;88800682;88800688;88805289;88807019;88810638;88811214;88811214;88811214;88819645;88821270;88824482;88825132;88825132;88825132;88830048;88832264;88832264;88832264;88832264;88832264;88832264;88832264;88832264	88784510;88801192;88801192;88808272;88808272;88811002;88811369;88811369;88811369;88825414;88821695;88824579;88825414;88825414;88825414;88832531;88832458;88832377;88832547;88832512;88832501;88832547;88832368;88832487	-;-;-;-;-;-;-;-;-;-;-;-;-;-;-;-;-;-;-;-;-;-;-;-	13854	3.50515	3.46942	3.22385	2.99814	3.39559	3.84999	3.10069	2.00254	1.73749	1.96296	2.90902	2.84642	3.47838
1500005C15Rik	3	127714634	127717027	-	2394	0.230597	0.458718	0.408784	1.57239	1.28521	0.980768	0.268184	2.44633	3.26691	2.08583	1.88217	2.2579	2.23427
1500009C09Rik	15;15;15;15	82252397;82256023;82259565;82259565	82252748;82256385;82260753;82260738	+;+;+;+	1904	0	0	0	0	0	0	0	0.270409	0.182562	0.154272	0.186133	0.315442	0.0315648
1500009L16Rik	10;10;10;10;10;10	83722865;83737909;83757445;83758134;83759593;83761918	83723034;83737933;83757480;83758213;83759630;83762761	+;+;+;+;+;+	1193	0.751954	0.874487	0.492185	1.29925	0.568261	1.00929	0.657759	2.42756	1.96672	3.20079	3.39502	1.20825	1.15866
1500011B03Rik	5;5;5;5	114808196;114812793;114813780;114813780	114809331;114813205;114813976;114813945	-;-;-;-	1746	1.59078	1.66675	1.40124	1.56148	1.74726	1.93094	1.69558	1.64948	1.24427	1.00939	1.85579	2.22147	1.41987
1500011K16Rik	2;2	127791388;127792134	127791832;127792488	-;-	800	6.72811	5.69676	5.54556	5.32814	4.75858	4.51531	5.35027	2.89608	0.868997	2.44778	3.03769	3.67868	5.85969
1500012K07Rik	7;7;7;7;7;7;7;7;7	75308696;75308702;75308702;75312068;75312068;75312068;75318207;75329405;75329405	75308916;75308916;75308920;75312178;75312178;75312178;75318485;75329837;75331419	+;+;+;+;+;+;+;+;+	2630	0	0	0	0.0210484	0	0	0	0.097882	0.165209	0	0	0	0
1500015A07Rik	18;18;18;18;18	61726390;61726433;61734357;61735598;61735598	61728254;61727002;61734467;61735909;61735917	+;+;+;+;+	2296	13.0288	11.8618	13.0569	6.60623	8.96025	11.3538	11.7756	5.88635	5.94219	7.20688	5.4906	5.50638	4.16193
1500015L24Rik	19;19;19;19;19	20405288;20421076;20422259;20422365;20422630	20405350;20421263;20422787;20422506;20422779	+;+;+;+;+	780	0	0	0	0	0	0.0771847	0	0	0	0.251054	0	0	0
1500015O10Rik	1;1;1;1	43730602;43737200;43738560;43742245	43730963;43737247;43738717;43742578	+;+;+;+	902	0.382518	0.669617	0.361651	0.368231	0.289074	1.40165	0.395437	0.499448	0.674388	0.759843	0.617417	0.532684	0.266516
1500017E21Rik	19;19;19;19;19;19;19;19;19;19;19;19;19;19;19;19;19;19;19;19;19;19;19;19;19;19;19;19;19;19;19	36614052;36619418;36619430;36619435;36625223;36625223;36625223;36625223;36625841;36625959;36625988;36643546;36645683;36645684;36645684;36645684;36658428;36658428;36658428;36658428;36658597;36675832;36676741;36685527;36685527;36685527;36689239;36689239;36689239;36689239;36705443	36614481;36621492;36621492;36621492;36625345;36625345;36625345;36625345;36625898;36626004;36626024;36643766;36645765;36645765;36645765;36645765;36658566;36658566;36658584;36658566;36658674;36675882;36676794;36685667;36685667;36685667;36689328;36689273;36689332;36689479;36705641	-;-;-;-;-;-;-;-;-;-;-;-;-;-;-;-;-;-;-;-;-;-;-;-;-;-;-;-;-;-;-	3977	0.190865	0.552261	0.180453	0.194871	0.170464	0.408728	0.34081	0.113277	0.240356	0.689342	0.190954	0.105713	0.226676
1500026H17Rik	10;10;10	89686371;89689149;89698163	89686519;89689322;89700866	+;+;+	3027	0.273563	0.43535	0.25864	0.0365757	0.0861395	0.159112	0.164968	0.0637833	0.114833	0.032346	0.117079	0.119049	0.0198544
1500035N22Rik	5;5	24985842;24997499	24986036;24998168	+;+	865	1.83485	2.6026	1.8856	1.02395	1.14547	2.6448	1.64941	0.223205	0.703235	0.565961	0.819415	0.694336	0.972706
1520401A03Rik	17;17;17;17;17;17;17;17;17;17;17;17;17;17;17;17;17;17;17;17;17;17;17;17;17;17;17;17;17;17;17;17;17;17;17;17;17;17;17;17;17;17;17;17;17;17;17;17;17;17;17;17;17;17;17;17;17;17;17;17;17;17;17;17;17;17;17;17;17;17;17;17;17;17;17;17;17;17;17;17;17;17;17;17;17;17;17;17;17;17;17;17;17;17;17;17;17;17;17;17;17;17;17;17;17;17;17;17;17;17;17;17;17;17;17;17;17;17;17;17;17;17;17;17;17;17;17;17;17;17;17;17;17;…	23704488;23704488;23704488;23705058;23705058;23705379;23705379;23705379;23705379;23705529;23705529;23705529;23705529;23705529;23705793;23705793;23705793;23705793;23705793;23705947;23705998;23705998;23705998;23705998;23706148;23706148;23706148;23706148;23706148;23706267;23706267;23706267;23706267;23706267;23707413;23707413;23707413;23707413;23707565;23707565;23707565;23707565;23707797;23707797;237…	23705235;23705235;23705235;23705235;23705235;23705432;23705432;23705432;23705432;23705570;23705570;23705570;23705570;23705570;23705870;23705870;23705870;23705870;23705870;23706057;23706057;23706057;23706057;23706057;23706177;23706177;23706177;23706177;23706177;23706326;23706339;23706326;23706326;23706326;23707445;23707445;23707445;23707445;23707948;23707683;23707683;23707606;23707948;23707948;237…	-;-;-;-;-;-;-;-;-;-;-;-;-;-;-;-;-;-;-;-;-;-;-;-;-;-;-;-;-;-;-;-;-;-;-;-;-;-;-;-;-;-;-;-;-;-;-;-;-;-;-;-;-;-;-;-;-;-;-;-;-;-;-;-;-;-;-;-;-;-;-;-;-;-;-;-;-;-;-;-;-;-;-;-;-;-;-;-;-;-;-;-;-;-;-;-;-;-;-;-;-;-;-;-;-;-;-;-;-;-;-;-;-;-;-;-;-;-;-;-;-;-;-;-;-;-;-;-	4111	0.0167858	0.0133565	0.0317401	0	0.00418612	0.0585785	0	0.0313098	0	0	0	0	0.0219287
1600002D24Rik	16;16;16;16;16;16;16;16	95831123;95841886;95842173;95843203;95843203;95897984;95898459;95929016	95832494;95842073;95842283;95843257;95843257;95898155;95898713;95929077	-;-;-;-;-;-;-;-	2215	0.124616	0.173526	0	0.149952	0.282522	0.0815405	0.0966189	0.755437	1.29467	0.839871	0.548567	1.58624	0.759721
1600002H07Rik	17;17;17;17;17;17;17;17;17;17;17;17;17;17;17;17;17;17;17;17;17;17;17;17;17;17;17;17;17;17;17;17;17;17;17;17	24215054;24215239;24215546;24216250;24216250;24216250;24217681;24217681;24217681;24217889;24217889;24217889;24218170;24218170;24218170;24219153;24219153;24219153;24219179;24219731;24219731;24219731;24219731;24219781;24220252;24220252;24220252;24220517;24220517;24220522;24220522;24220691;24220691;24220691;24220691;24220691	24216005;24216005;24216005;24216440;24216440;24216440;24217782;24217782;24217782;24218000;24218000;24218000;24218263;24218263;24218263;24219206;24219206;24219206;24219206;24220133;24220133;24220310;24220133;24220310;24220615;24220310;24220310;24220615;24220615;24220615;24220615;24220753;24220692;24220731;24220851;24220790	-;-;-;-;-;-;-;-;-;-;-;-;-;-;-;-;-;-;-;-;-;-;-;-;-;-;-;-;-;-;-;-;-;-;-;-	2551	2.46161	2.19548	2.37848	1.54072	1.88071	2.14762	2.26511	1.38756	1.22634	0.959538	2.02433	1.81287	1.93185
1600002K03Rik	10;10;10	80172944;80174209;80174817	80173174;80174325;80175146	+;+;+	678	3.46049	4.61621	5.19625	4.00075	4.92261	4.35103	5.36605	2.65783	2.43524	1.44412	2.09084	2.65753	3.45704
1600010M07Rik	7;7;7;7;7;7;7;7;7;7;7;7	109998376;109998404;109998412;109998950;110001140;110003586;110003586;110003586;110006558;110006558;110147628;110150565	109998773;109998773;109998773;109999233;110001255;110003715;110003715;110003715;110006631;110006646;110147701;110151202	-;-;-;-;-;-;-;-;-;-;-;-	1729	0.279378	0.190544	0.188669	1.37673	1.0104	0.626763	0.371332	0.335001	0.502601	0.113258	1.02486	2.50106	1.56418
1600012H06Rik	17;17;17;17;17;17;17;17;17;17;17	14943184;14943230;14943269;14943271;14943502;14943567;14943572;14948868;14952566;14958775;14959188	14943319;14943319;14943319;14943319;14945934;14945936;14944986;14948906;14952765;14958875;14959570	+;+;+;+;+;+;+;+;+;+;+	3294	9.23854	10.7405	12.9697	10.8312	8.8023	12.3552	11.3481	8.03979	7.78246	9.97244	10.3055	11.2316	12.2516
1600012P17Rik	1;1;1;1;1;1	158967701;158969608;158979678;158979678;158979955;158980311	158969865;158969865;158979834;158979834;158980071;158980463	-;-;-;-;-;-	2592	0	0	0	0	0	0	0	0	0	0	0	0.0115857	0
1600014C10Rik	7;7;7;7;7;7;7;7;7;7;7;7;7;7;7;7;7;7;7;7;7;7;7;7;7;7;7	38183217;38183217;38183240;38183261;38183653;38183717;38183787;38183848;38183898;38186271;38188606;38188606;38188606;38188606;38188606;38188606;38188606;38188606;38194704;38194704;38194704;38194704;38194704;38194704;38194704;38194785;38194785	38183521;38183521;38183521;38183526;38183899;38183899;38183899;38183899;38184025;38186320;38188776;38188956;38188776;38188776;38188776;38188776;38188776;38188776;38194972;38195266;38196592;38197568;38194783;38197568;38194783;38197563;38197563	+;+;+;+;+;+;+;+;+;+;+;+;+;+;+;+;+;+;+;+;+;+;+;+;+;+;+	3949	4.89282	4.7136	6.06325	25.0503	22.7004	6.55552	5.47356	16.8512	16.2291	13.116	18.2628	31.8019	28.2462
1600014C23Rik	17;17	45732864;45733586	45733122;45733844	-;-	518	0	0	0	0	0.100673	0	0	0	0.16776	0.189018	0.0977378	0	0
1600015I10Rik	6;6;6;6	48929895;48932411;48933008;48933386	48931655;48932699;48933140;48933687	+;+;+;+	2485	0	0	0	0	0	0	0	0	0	0	0	0	0
1600017P15Rik	3;3	30594844;30595346	30595733;30595757	-;-	914	0.0754992	0	0	0	0	0.0658688	0	0	0	0	0	0.0657113	0
1600019K03Rik	16;16;16	35503170;35506223;35509303	35503413;35506338;35509419	-;-;-	477	0	0	0	0	0	0	0	0	0	0	0	0	0
1600020E01Rik	6;6;6;6;6;6;6;6;6;6;6;6;6;6;6;6;6;6;6;6;6;6;6;6;6;6;6;6;6;6;6;6;6;6;6	86526247;86526247;86526271;86526810;86527319;86527401;86527474;86527891;86527891;86527891;86527891;86527891;86527893;86532193;86532193;86532193;86532193;86532193;86532193;86532193;86547981;86550917;86550917;86563432;86563432;86563432;86563432;86563432;86564276;86564276;86564276;86564276;86577961;86580797;86580797	86526282;86526282;86527974;86527367;86527433;86527531;86527531;86527974;86527974;86527974;86527974;86527974;86527974;86532307;86532307;86532307;86532307;86532307;86532307;86532307;86548156;86551114;86551042;86563505;86563537;86563537;86563537;86563537;86564449;86564448;86564449;86564449;86578121;86582466;86582036	+;+;+;+;+;+;+;+;+;+;+;+;+;+;+;+;+;+;+;+;+;+;+;+;+;+;+;+;+;+;+;+;+;+;+	4328	2.64673	2.56908	2.36668	2.03369	2.26525	2.48996	2.34878	3.44984	3.7346	4.32094	2.57352	2.99745	2.33288
1600023N17Rik	5	45668702	45669708	-	1007	0	0.163581	0.259153	0.164918	0.155359	0.179357	0.070841	0.12782	0.172591	0	0	0.357856	0.179045
1600025M17Rik	X;X;X;X;X	56317608;56317666;56318940;56318940;56320318	56317746;56317746;56319524;56319000;56320664	+;+;+;+;+	1071	0	0	0	0	0	0	0	0	0	0	0	0	0
1600027J07Rik	8;8;8	103343878;103347168;103347499	103344160;103347337;103347534	-;-;-	489	0	0	0	0	0	0.123117	0	0	0	0	0	0	0
1600029O15Rik	9;9;9;9	58202897;58203410;58207389;58208038	58203044;58203650;58208808;58208554	+;+;+;+	1809	0.0381461	0.060706	0	0.0306011	0.0864824	0	0	2.06342	1.68131	1.13661	0.251881	0.0664014	0.0996673
1700001C02Rik	5;5;5;5;5;5;5;5;5;5;5;5;5;5	30466047;30466055;30466059;30466084;30480385;30480385;30480385;30480385;30482032;30482070;30482076;30483868;30483868;30483868	30466184;30466184;30466184;30466184;30480655;30480655;30480906;30480655;30482188;30482188;30482188;30484067;30484088;30484044	+;+;+;+;+;+;+;+;+;+;+;+;+;+	1038	2.85864	5.23694	2.19987	1.86658	0.200959	2.32	1.03088	0.186004	1.75809	1.4149	1.56079	1.67798	0.347395
1700001C19Rik	17;17;17;17;17;17;17;17;17;17;17;17	47412734;47413375;47413383;47413628;47414533;47421787;47433336;47433336;47436607;47436607;47437191;47437266	47413894;47413894;47413894;47413894;47414711;47421880;47433423;47433423;47436794;47436794;47437375;47437376	-;-;-;-;-;-;-;-;-;-;-;-	1896	1.16466	0.839846	1.03231	0.613135	0.302551	0.698571	0.188125	0.644932	0.274999	0.826255	0.480647	0.411804	0.348678
1700001D01Rik	8;8;8;8;8	61281522;61282012;61282261;61282803;61288744	61281572;61282156;61282416;61282886;61288872	-;-;-;-;-	565	5.61821	6.4141	4.61889	4.99686	4.61494	8.73759	6.9443	4.78409	3.99893	5.19883	4.56998	3.40163	5.63764
1700001F09Rik	14;14;14;14;14	43342383;43344504;43345349;43346634;43347751	43342731;43344688;43345480;43346790;43347811	-;-;-;-;-	884	0	0	0	0	0	0	0	0	0	0	0	0	0
1700001G01Rik	18;18;18;18;18;18;18;18;18;18;18;18;18;18;18;18;18;18;18	17019051;17019076;17032426;17035508;17036192;17036192;17038565;17038565;17045370;17045370;17047252;17122253;17122253;17125731;17125787;17129395;17137139;17137139;17137139	17019164;17019164;17032615;17035864;17036290;17036290;17038654;17038654;17045446;17045512;17047568;17122347;17122347;17125840;17125840;17129707;17137514;17137559;17137559	+;+;+;+;+;+;+;+;+;+;+;+;+;+;+;+;+;+;+	2249	0	0	0	0	0	0	0	0	0	0	0	0	0
1700001G11Rik	14;14;14;14;14;14;14;14;14;14	66295334;66295335;66295495;66295955;66295955;66295955;66296493;66296493;66296809;66296809	66295586;66295586;66295586;66296144;66296144;66296144;66296677;66296883;66296940;66297129	-;-;-;-;-;-;-;-;-;-	1080	4.28094	2.94879	3.68496	2.2553	2.0763	2.39701	2.31184	1.96648	0.965553	0.815927	2.48453	2.22445	2.2259
1700001G17Rik	1;1	33669824;33669843	33670712;33670712	+;+	889	0.0776223	0.308822	0.0733879	0.0622692	0.0586601	0	0.240732	0.072393	0	0.110136	0.227798	0.270237	0.270413
1700001J03Rik	5;5;5;5;5;5;5;5	146182441;146182450;146183447;146183447;146184167;146184167;146184753;146185139	146182613;146182613;146183643;146183643;146184295;146184214;146184955;146185304	-;-;-;-;-;-;-;-	868	0.238501	0.822363	0.676471	0.637757	0.420555	0.728275	0.328742	2.0019	3.70425	2.70722	0.991565	0.553549	0.346194
1700001J04Rik	11;11;11;11;11	114185439;114185973;114186131;114186553;114186553	114185740;114186374;114186346;114186777;114186674	-;-;-;-;-	929	0	0	0	0	0	0	0	0	0	0	0	0	0
1700001J11Rik	9;9	40050365;40050566	40051123;40053028	+;+	2664	0.0906614	0	0.0979607	0.0103899	0.0293631	0.0677974	0.0133891	0.157028	0.11417	0.11026	0.0570137	0.0563627	0.0225598
1700001K19Rik	12;12;12;12;12;12	110667689;110668447;110670231;110670719;110672183;110682571	110667810;110668952;110670281;110670886;110672240;110682619	-;-;-;-;-;-	954	1.37434	2.70514	1.98324	1.50869	3.22514	2.14564	3.14062	2.5635	2.00398	1.53948	1.3798	1.25912	1.82692
1700001L05Rik	15;15;15;15;15;15;15;15;15;15;15;15;15	83357526;83357534;83357560;83358618;83358823;83363820;83365029;83365029;83365029;83365029;83366869;83366990;83366990	83358037;83358037;83358950;83358950;83358950;83363928;83365510;83365142;83365513;83365513;83367011;83367277;83367282	-;-;-;-;-;-;-;-;-;-;-;-;-	2433	2.56682	2.4148	1.68937	2.36628	1.92906	2.32601	2.46293	1.50776	1.32153	1.24753	2.35141	2.3945	2.12435
1700001L19Rik	13;13;13	68597439;68611161;68612830	68597727;68611277;68614231	+;+;+	1808	1.03051	2.03478	0.829957	0.704214	0.519181	0.965663	0.749669	0.106788	1.10547	0.812317	0.868071	0.764039	0.0997224
1700001N15Rik	3;3	143409401;143411277	143409626;143411532	+;+	482	0	0	0	0	0	0	0	0	0	0	0	0	0
1700001O22Rik	2;2;2;2;2;2;2;2;2;2;2;2;2;2;2;2;2;2;2;2;2;2;2;2;2;2;2;2;2;2;2;2;2;2;2;2;2;2;2;2;2;2;2;2;2;2;2;2;2;2;2;2;2;2;2;2;2;2;2;2;2;2;2;2;2;2;2;2;2;2;2;2;2;2;2;2;2;2	30794769;30795301;30795468;30795563;30795566;30795573;30795580;30795604;30795657;30795674;30795699;30796108;30796109;30796109;30796145;30796145;30796145;30796145;30796145;30796145;30796145;30796145;30796182;30796401;30796401;30796401;30796401;30796401;30796401;30796401;30796401;30796401;30796401;30796546;30796787;30797253;30797868;30797868;30797868;30797868;30797868;30797868;30797868;30797868;307…	30795009;30795805;30795805;30795805;30795805;30795805;30795805;30795805;30795805;30795805;30795805;30796283;30796283;30796211;30796283;30796283;30796283;30796283;30796283;30796283;30796283;30796283;30796566;30796566;30796566;30796566;30796566;30796566;30796566;30796566;30796664;30796566;30796566;30796566;30796875;30797610;30797980;30798028;30797980;30797980;30797980;30797980;30797980;30797980;307…	-;-;-;-;-;-;-;-;-;-;-;-;-;-;-;-;-;-;-;-;-;-;-;-;-;-;-;-;-;-;-;-;-;-;-;-;-;-;-;-;-;-;-;-;-;-;-;-;-;-;-;-;-;-;-;-;-;-;-;-;-;-;-;-;-;-;-;-;-;-;-;-;-;-;-;-;-;-	2788	0.0990047	0.295419	0.0702029	0.119133	0.0374095	0.129564	0.0511743	0	0.0935076	0.0702376	0.0726373	0.0646271	0.0646693
1700001P01Rik	11;11;11	97771481;97772716;97775652	97771737;97772815;97775918	-;-;-	624	0.110587	0.527967	0.418217	0.532282	0.752147	0.868328	0.342966	0.360979	0.139262	0.470727	0.892484	0.0962501	0.192626
1700003C15Rik	5;5;5;5;5;5;5;5;5;5;5	11689253;11691840;11697241;11719605;11742437;11744014;11749832;11754039;11757433;11769221;11769221	11689578;11692027;11697418;11719745;11742524;11744253;11750102;11754169;11757652;11769308;11769283	-;-;-;-;-;-;-;-;-;-;-	1871	0	0	0	0.029587	0	0	0	0	0	0	0	0	0
1700003D09Rik	11;11;11	98350718;98355423;98358237	98351994;98355487;98358283	-;-;-	1389	1.19233	1.60101	1.87882	0.478249	0.300353	1.6904	1.28396	1.32051	0.312814	0.493433	0.109348	0.0864796	0.0432681
1700003E16Rik	6;6;6;6;6;6	83156404;83156501;83160912;83160912;83161216;83161557	83156590;83156590;83162891;83161133;83161437;83162945	+;+;+;+;+;+	2221	2.29917	3.78253	1.70375	1.5204	0.727877	2.52093	0.995698	0.144884	0.508643	0.793517	1.82362	1.56843	0.838847
1700003E24Rik	X;X	93156154;93156527	93156383;93156873	+;+	577	0	0	0	0	0	0	0	0	0	0	0	0	0
1700003F12Rik	2;2;2;2;2;2;2;2;2	154547085;154548888;154548927;154548956;154549297;154549336;154549337;154549540;154549540	154547173;154549067;154549067;154549067;154549395;154549395;154549818;154550003;154550003	+;+;+;+;+;+;+;+;+	976	0.565625	0.675105	0.267385	0.340312	0.213725	0.246738	0.219273	0.26376	0.356146	0.300957	0.155619	0.246148	0.184732
1700003G13Rik	9;9;9;9;9;9;9	45318265;45318266;45319093;45319093;45321369;45321967;45321967	45318478;45318478;45319319;45319319;45321520;45322079;45322058	-;-;-;-;-;-;-	706	0.684198	1.16661	0.369642	0.23523	0	0.426375	0.202088	0	0.123087	0.138684	0.215134	0.085071	0
1700003G18Rik	7;7;7;7;7;7;7;7	116081759;116081898;116086627;116089113;116089113;116091896;116093062;116093062	116082086;116082086;116086755;116089190;116089190;116093098;116093106;116093159	-;-;-;-;-;-;-;-	1799	0.0383581	0.0305217	0.0362656	0.0307712	0.0289877	0.133861	0	0	0	0	0	0.0667705	0
1700003H04Rik	3;3;3;3;3;3;3;3;3;3;3;3;3;3;3;3;3;3;3;3;3;3;3;3;3;3;3;3;3;3	124556352;124556352;124565888;124573217;124573218;124573218;124574462;124574462;124575320;124575320;124575320;124575320;124575320;124578435;124578435;124578435;124578435;124578435;124578435;124578506;124579796;124579796;124579796;124579796;124579796;124580978;124580978;124580978;124580978;124580978	124556902;124556946;124566198;124573305;124573305;124573305;124574556;124574556;124575361;124575361;124575361;124575361;124575361;124578516;124578584;124578501;124578503;124578584;124578584;124578584;124579980;124579980;124579980;124579980;124579980;124581094;124581101;124581091;124581092;124581091	-;-;-;-;-;-;-;-;-;-;-;-;-;-;-;-;-;-;-;-;-;-;-;-;-;-;-;-;-;-	1591	0	0	0	0	0	0	0	0	0	0	0	0	0
1700003I16Rik	6;6	149199095;149215091	149200057;149215185	-;-	1058	0.0652233	0.103797	0	0.209291	0.24645	0.170711	0	0.547464	0.164272	0.462718	0.0478527	1.64626	0.96568
1700003I22Rik	1;1;1;1	56018978;56019023;56019798;56019856	56019053;56019053;56020137;56020203	+;+;+;+	482	0	0	0	0	0	0	0	0	0	0	0	0	0
1700003L19Rik	16;16;16;16;16	12811390;12818163;12822166;12847127;12848339	12811522;12818213;12822233;12847305;12848653	+;+;+;+;+	746	0	0	0	0	0	0	0	0	0	0	0	0.0805095	0
1700003M07Rik	4;4;4;4;4;4;4	129960374;129960664;129960808;129961199;129961199;129963372;129963372	129960561;129960808;129960980;129961280;129961280;129963520;129963657	+;+;+;+;+;+;+	873	0	0.125793	0.0747329	0	0	0.0689623	0	0	0.0995415	0.112155	0	0	0.0688423
1700003N22Rik	3	8462228	8463035	-	808	0.128106	0.203868	0.322979	0.376814	0.193622	0.22353	0.52973	0.677027	0.215098	0.484709	0.156647	0.743318	0.483473
1700003P14Rik	13;13;13;13;13;13;13;13;13;13;13;13	118555360;118556152;118556168;118564993;118564993;118564993;118587172;118587172;118587172;118587886;118587886;118588038	118555384;118556219;118556219;118565139;118565139;118565175;118587222;118587222;118587222;118588704;118588629;118588626	+;+;+;+;+;+;+;+;+;+;+;+	1146	0	0	0	0	0	0	0	0	0	0	0	0	0
1700006A11Rik	3;3;3;3;3;3;3;3;3;3;3;3;3;3;3;3;3;3;3;3;3;3;3	124400989;124401224;124406331;124406331;124407592;124407592;124409616;124409616;124412386;124412386;124413565;124413565;124414312;124414312;124416735;124416735;124419224;124419224;124419756;124421377;124421377;124425936;124425936	124401413;124401413;124406520;124406520;124407701;124407701;124409774;124409774;124412561;124412561;124413823;124413823;124414501;124414501;124416844;124416844;124419385;124419385;124419934;124421472;124421472;124425991;124426040	-;-;-;-;-;-;-;-;-;-;-;-;-;-;-;-;-;-;-;-;-;-;-	2161	0	0	0	0	0	0	0	0	0	0	0	0	0
1700006E09Rik	11;11;11;11;11;11;11;11;11;11;11;11;11;11;11	101984279;101984284;101987056;101987947;101987947;101988446;101988446;101988446;101990794;101990794;101990794;101991456;101991456;101992120;101992120	101984378;101984378;101987237;101988017;101988017;101988564;101988564;101988564;101990917;101990917;101990850;101991512;101991512;101992264;101992256	+;+;+;+;+;+;+;+;+;+;+;+;+;+;+	798	0.86474	0.756885	0.408784	0.346851	0.784194	0.60355	0.715157	0.241945	0.108897	0.245392	0.507551	0.677369	0.527187
1700006F04Rik	14;14;14	119749225;119750112;119751291	119749284;119750218;119751564	+;+;+	441	0.782384	0.871564	0.147941	0.502107	1.18251	0.682586	0.97057	0	0	0	0.114803	0.136191	0
1700006H21Rik	13;13;13;13;13	107687397;107687397;107689948;107691891;107691891	107687584;107687584;107690103;107692173;107692162	+;+;+;+;+	627	0.110058	0	0	0	0.083172	0	0	0	0	0	0.161493	0	0
1700006J14Rik	10;10;10;10;10;10;10;10;10;10;10;10;10;10;10	120364157;120364158;120364170;120364213;120369875;120369875;120369875;120369875;120371257;120380470;120382065;120382065;120382065;120383275;120383733	120364316;120364316;120364316;120364316;120370024;120370024;120370024;120370024;120371304;120380724;120382101;120384336;120382836;120383460;120383829	+;+;+;+;+;+;+;+;+;+;+;+;+;+;+	2885	0	0.0380649	0	0.057564	0.0361517	0.031302	0	0.0223076	0.0903637	0.033938	0.0263231	0.0416361	0.187485
1700006P03Rik	1	137325434	137325842	-	409	0	0	0	0	0	0	0	0	0	0	0	0	0
1700007B14Rik	8;8;8;8;8;8;8;8;8;8;8;8;8;8;8;8;8;8;8;8;8;8;8;8;8;8;8;8;8;8;8;8;8;8;8;8;8;8;8;8;8;8	75448694;75448791;75448983;75462609;75462609;75465865;75554843;75554843;75554843;75575873;75575873;75575873;75577730;75577730;75577730;75625021;75625021;75625021;75629714;75629714;75629714;75669384;75669384;75669384;75714770;75714770;75714770;75746263;75746263;75746263;75753340;75753340;75753340;75762975;75762975;75762975;75888497;75888497;75888497;75984192;75984192;75984192	75449006;75449006;75449006;75462726;75462726;75465890;75554924;75554924;75554924;75575955;75575955;75575955;75577994;75577994;75577994;75625111;75625111;75625111;75629793;75629793;75629793;75669499;75669499;75669499;75714828;75714828;75714828;75746458;75746458;75746458;75753484;75753484;75753484;75763109;75763109;75763109;75888658;75888658;75888658;75984503;75984478;75984478	+;+;+;+;+;+;+;+;+;+;+;+;+;+;+;+;+;+;+;+;+;+;+;+;+;+;+;+;+;+;+;+;+;+;+;+;+;+;+;+;+;+	2183	0	0	0	0	0	0.0275786	0	0.0294812	0	0	0	0	0
1700007E05Rik	16;16	31376506;31377635	31378018;31379133	-;-	2628	0.0722098	0.0417873	0.0372385	0	0.0396871	0.0458174	0	0.0244891	0.0330669	0.111771	0.00385298	0.0457078	0.0457377
1700007F19Rik	3;3;3;3;3;3	58141707;58146773;58148315;58162346;58163507;58163762	58142886;58146824;58148510;58162466;58163553;58163807	-;-;-;-;-;-	1642	0.0840515	0.0668801	0	0.0337134	0.0317594	0	0	0	0	0	0	0	0
1700007G11Rik	5;5;5;5;5;5;5;5;5;5;5;5;5;5;5;5;5;5	98329304;98329351;98329356;98329370;98330813;98346232;98346232;98346232;98346232;98498289;98498289;98698406;98737569;98737569;98784419;98784419;98801815;98801815	98329464;98329464;98329464;98329464;98330868;98346362;98346670;98346275;98346362;98498379;98498379;98698600;98737711;98737711;98784548;98784548;98802047;98802019	+;+;+;+;+;+;+;+;+;+;+;+;+;+;+;+;+;+	1448	2.59727	5.83972	1.93743	1.93063	0.594238	3.15988	1.57651	0.333343	2.49057	2.19759	1.04893	1.32729	0.352793
1700007J10Rik	11;11;11;11;11;11;11;11;11;11	59725917;59725917;59730048;59730048;59731478;59731478;59732586;59733795;59735969;59740038	59726122;59726122;59730182;59730182;59731628;59731628;59732772;59734216;59736048;59740154	-;-;-;-;-;-;-;-;-;-	1298	38.0917	29.9924	38.8787	23.5844	22.8402	31.4935	34.7616	32.3274	29.1897	31.9833	31.8279	31.21	25.5353
1700007K09Rik	7;7;7;7;7;7	131325944;131326099;131327192;131327192;131329216;131329438	131326324;131326324;131327327;131327325;131329299;131329516	-;-;-;-;-;-	680	0	0.161496	0.191888	0.162816	0.0766895	0.0885354	0.314722	0.28393	0.638969	0.863923	0.148906	0.0883237	0.441907
1700007K13Rik	2;2;2;2;2;2;2;2;2	28462001;28462001;28462348;28465137;28465137;28465137;28465700;28466034;28466034	28462434;28462434;28462430;28465215;28465215;28465215;28465852;28466332;28466316	-;-;-;-;-;-;-;-;-	965	8.79562	16.1499	5.74669	6.2528	3.18838	7.17458	3.73318	0.600224	2.70155	3.2468	3.20033	2.80073	1.12102
1700007L15Rik	16;16	33379855;33380516	33380379;33380727	-;-	737	0.280894	0.819531	0.265571	0.45067	0.707583	0.653504	0.0967937	0.960558	0.11791	0.398553	0.618254	0.488956	0.326184
1700007M16Rik	2;2	171234009;171238665	171234116;171238991	+;+	435	0	0	0	0	0	0	0	0	0	0	0	0	0
1700007P06Rik	1;1;1	187125138;187125630;187127562	187125315;187125983;187127852	+;+;+	823	0.670778	1.20092	0	0.403577	0.0633644	0.585216	0.0866791	0.0781985	0.211178	0.95175	0.123033	0.364885	0
1700008A23Rik	9	99322826	99323516	+	691	0.599186	0.715162	0.472083	0.721007	0.226406	0.261378	0	0	0.377278	0.141695	0.219804	0.0869176	0
1700008B11Rik	5	121835195	121835828	+	634	2.82991	3.55087	2.46972	2.35749	4.27719	4.653	2.36289	3.0453	1.91892	3.70642	4.55174	5.39972	2.65423
1700008H02Rik	5	82119679	82121362	-	1684	0.00819552	0	0	0	0	0	0	0	0	0	0	0	0
1700008J07Rik	7	127510438	127512869	-	2432	3.63191	4.17684	3.48743	3.34602	3.53806	3.76276	2.6986	3.13134	3.60891	2.61687	3.79919	4.44524	3.65736
1700008K24Rik	17;17;17;17;17;17;17;17;17;17;17;17	49112263;49112263;49112265;49112265;49112373;49113173;49113173;49113173;49113317;49113317;49113344;49113434	49112849;49112849;49112849;49112849;49112849;49113535;49113246;49113225;49113436;49113493;49113515;49113528	-;-;-;-;-;-;-;-;-;-;-;-	950	0	0	0	0	0	0	0	0	0	0	0	0	0
1700008N11Rik	8;8	28084828;28085305	28085171;28085596	+;+	636	0	0	0	0	0	0	0	0	0	0	0	0	0
1700008O03Rik	7;7;7;7;7;7;7;7;7;7;7;7;7;7;7;7;7;7;7	44360043;44360099;44360237;44361050;44361050;44361050;44362652;44362652;44362652;44362682;44362943;44362943;44373254;44374323;44374323;44374987;44378887;44385610;44385610	44360381;44360381;44360381;44361183;44361183;44361183;44362772;44362772;44363015;44363015;44363015;44363015;44373600;44374514;44374524;44375030;44380920;44385820;44385684	-;-;-;-;-;-;-;-;-;-;-;-;-;-;-;-;-;-;-	3675	0.168995	0.13447	0.0887644	0.0451897	0.0993312	0.0491462	0.097057	0.0700489	0	0.0133213	0.0826582	0.0653715	0
1700008P02Rik	3;3;3;3	6615418;6617255;6619621;6620006	6615577;6617373;6619686;6620443	-;-;-;-	783	0	0	0	0	0	0	0	0	0	0	0	0	0
1700009C05Rik	6;6;6;6;6;6	81900464;81902664;81908011;81908461;81909986;81910652	81900748;81902799;81908031;81908534;81910108;81910800	-;-;-;-;-;-	788	0	0	0	0	0	0	0	0	0	0	0	0	0
1700009J07Rik	10;10;10;10;10;10	77893417;77893420;77893428;77893895;77895842;77895842	77894063;77893892;77894511;77894063;77896111;77896114	+;+;+;+;+;+	1368	0.100886	0.120414	0.524606	0.0404659	0.152482	0.704141	0.208587	0.235224	0	0	0.0740178	0.0439036	0.0878646
1700009N14Rik	4;4	39450295;39450758	39450533;39451776	+;+	1258	0	0	0	0	0	0	0	0	0	0	0	0	0
1700010B08Rik	2;2;2	173719415;173720184;173721787	173719918;173720275;173722089	+;+;+	899	0.0767589	0.122155	0	0.0615766	0	0	0	0.214763	0.289988	0.217823	0.112632	0	0
1700010B13Rik	15;15;15	73645852;73645874;73651997	73647049;73647602;73652347	+;+;+	2102	0	0	0	0	0	0	0	0	0	0	0	0	0
1700010D01Rik	X;X	95732586;95732982	95732808;95733265	-;-	507	0	0	0.128682	0.327558	0	0	0.281408	0.253875	0.1714	0.386238	0	0.236923	0.118539
1700010H22Rik	5;5;5;5;5;5;5;5;5	98553629;98562782;98563646;98564177;98564186;98564197;98566431;98566431;98566431	98553980;98563094;98563695;98564242;98564242;98564242;98566762;98566926;98567004	-;-;-;-;-;-;-;-;-	1355	1.62967	2.10719	0.866681	0.653666	0.30789	1.11078	0.473825	0.142489	0.384796	1.15615	0.448368	0.620547	0.0887075
1700010I02Rik	3;3;3;3;3;3;3;3	7925303;7925303;7933195;7943534;7943534;7945200;7954812;7954812	7925493;7925493;7933333;7943562;7943562;7945339;7954882;7954889	-;-;-;-;-;-;-;-	577	0	0	0.113071	0	0	0	0	0.334614	0.150606	0.848451	0.350975	0	0
1700010I14Rik	17;17;17;17;17;17;17;17;17;17;17;17;17;17;17;17;17;17;17;17;17;17;17;17;17;17;17;17;17;17	8988333;8988357;8988383;8988529;8990001;8992046;8992046;8992046;8993596;8993596;8993596;8995198;8995198;8995198;8996979;8996979;8996979;9001128;9001128;9001128;9001770;9001770;9001770;9005192;9005192;9005192;9005693;9005693;9007897;9008006	8988421;8988421;8988421;8988690;8990068;8992752;8992752;8992752;8993718;8993718;8993718;8995257;8995257;8995257;8997103;8997103;8997103;9001186;9001186;9001186;9001945;9001945;9001945;9005263;9005245;9005245;9005754;9005754;9008318;9008319	+;+;+;+;+;+;+;+;+;+;+;+;+;+;+;+;+;+;+;+;+;+;+;+;+;+;+;+;+;+	2126	1.07112	1.49798	1.07407	0.963416	0.637757	1.01945	0.905972	0.423802	0.572247	0.87503	0.928739	0.819258	0.650181
1700010J16Rik	10;10;10;10;10;10;10;10;10;10;10	112726888;112726926;112734873;112734873;112756426;112757219;112759467;112782689;112782689;112785443;112785443	112726980;112726980;112735003;112735003;112756572;112757411;112759609;112782749;112782749;112785602;112785599	+;+;+;+;+;+;+;+;+;+;+	928	0	0	0	0	0	0	0	0	0	0	0	0	0
1700010K23Rik	16;16;16	66657118;66660045;66664397	66657202;66660105;66664626	+;+;+	376	0.550582	0.730167	0	0	0	0.160117	0.379452	0.171163	0.462233	0.260402	0	0	0
1700010K24Rik	3;3	108248909;108256878	108249026;108256985	-;-	226	0.305337	0.485916	0.577362	0.244944	0.461494	0.26639	0	0	0.384512	0.433236	0	0.531505	0.265926
1700010L04Rik	7;7;7;7;7;7;7;7;7;7;7;7;7;7;7	82851599;82853947;82856253;82856263;82856391;82857384;82857384;82857396;82858372;82858372;82858372;82858919;82859305;82859311;82859802	82852257;82854061;82856301;82856301;82856401;82857511;82857511;82857511;82858436;82858436;82858436;82858923;82859848;82859404;82859849	+;+;+;+;+;+;+;+;+;+;+;+;+;+;+	1577	0.131274	0.104455	0.0413709	0	0.0330684	0.114529	0.180943	0.16324	0.165313	0.558783	0	0.038085	0
1700010N08Rik	7;7;7;7;7;7;7;7	38791661;38796829;38826761;38834057;38847168;38859624;38859715;38860052	38791749;38797028;38826907;38834265;38847239;38859812;38859839;38860532	+;+;+;+;+;+;+;+	1414	0	0	0	0	0.0184402	0	0	0	0	0	0	0	0
1700011B04Rik	13;13;13;13	35180267;35181623;35184728;35187535	35182749;35181695;35184822;35188017	+;+;+;+	3061	0	0	0	0.0542542	0.102219	0.0196681	0.0233051	1.07227	0.42584	0.703707	1.02546	0.529769	0.137437
1700011C11Rik	7;7;7	71961173;71969008;72027095	71961256;71969065;72027317	+;+;+	365	0	0	0	0	0	0	0	0	0.476163	0	0.416122	0	0
1700011D18Rik	7	78847254	78847530	+	277	0	0	0.23553	0	0	0	0	0	0	0.35347	0	0	0
1700011H14Rik	14;14;14;14;14;14;14;14;14;14;14;14;14;14;14;14;14;14	49226358;49226592;49232811;49232812;49232812;49234463;49234463;49234463;49235880;49235880;49235880;49243729;49243729;49245041;49245041;49245061;49245358;49245358	49226801;49226801;49232971;49232971;49232971;49234564;49234564;49234564;49235966;49235966;49235966;49243811;49243811;49245397;49245261;49245261;49245397;49245428	-;-;-;-;-;-;-;-;-;-;-;-;-;-;-;-;-;-	1265	0.109101	0.130218	0.0515746	0.218804	0.164898	0.237961	0.0563928	1.17013	0.274782	0.619201	0.800445	0.617218	0.0475094
1700011I03Rik	18;18;18;18;18;18;18;18;18;18;18;18;18;18;18;18;18;18;18;18;18;18;18	57533780;57533829;57533882;57538033;57538033;57538033;57563176;57563944;57563944;57563944;57563944;57566724;57591968;57591968;57591968;57594079;57594079;57594079;57667235;57667235;57730715;57730715;57730715	57533968;57533968;57533968;57538084;57538084;57538084;57563291;57564042;57564042;57564042;57564042;57566946;57592099;57592099;57592099;57594135;57594135;57594135;57667367;57667367;57731006;57731065;57731065	+;+;+;+;+;+;+;+;+;+;+;+;+;+;+;+;+;+;+;+;+;+;+	1352	0.15312	0.0812257	0.0965116	0.0409448	0.0385716	0.133589	0.158292	0.0952032	0.064275	0.217259	0.0374469	0.0444231	0
1700011L03Rik	8;8	46946795;46948661	46947263;46948799	-;-	608	0	0	0	0	0.171542	0	0	0	0	0	0	0	0
1700011L22Rik	8;8;8;8;8;8;8;8;8	79210431;79213478;79214893;79220244;79223297;79229317;79229317;79248220;79248220	79210757;79213551;79214965;79220305;79223358;79229393;79229393;79248543;79248570	-;-;-;-;-;-;-;-;-	1026	0.336288	0.0535171	0.127177	0.107909	0.152482	0.117357	0.0695292	0.564538	0.423488	0.76344	0.172708	0.409767	0.0585764
1700011M02Rik	X;X;X	102908905;102909188;102909500	102909008;102909351;102909651	+;+;+	420	0	0	0	0	0	0.143343	0	0	0	0	0	0	0
1700012A03Rik	6;6;6;6;6;6;6;6;6;6;6	32050246;32050268;32050285;32051333;32051333;32051333;32058141;32058483;32058483;32058483;32058483	32050371;32050371;32050371;32051730;32051412;32051730;32058185;32058915;32058621;32058921;32058921	+;+;+;+;+;+;+;+;+;+;+	1008	0	0	0	0	0	0.179179	0	0.255386	0.0862101	0.0971342	0	0	0
1700012B07Rik	11;11;11;11;11;11;11;11;11;11;11;11;11;11;11	109787651;109791557;109791598;109791636;109794106;109794106;109797278;109797278;109797278;109813559;109813559;109813559;109814012;109827838;109827838	109788821;109791794;109791794;109791794;109794279;109794279;109797411;109797411;109797411;109813746;109813746;109813746;109814074;109828022;109828046	-;-;-;-;-;-;-;-;-;-;-;-;-;-;-	2177	0	0	0.0299687	0.0254283	0	0.0553092	0.0327685	0.0886873	0.0399172	0	0	0.0275885	0.055213
1700012B09Rik	9;9;9;9;9;9;9;9;9;9;9;9;9;9;9;9;9;9;9	14756587;14756593;14756595;14758191;14758191;14758323;14758346;14758384;14761605;14761605;14761605;14761605;14761622;14766857;14766857;14766857;14770839;14770839;14770839	14756717;14756717;14756717;14758455;14758455;14758455;14758455;14758455;14761730;14761615;14761659;14761730;14761730;14766961;14766961;14766961;14771030;14771013;14771013	-;-;-;-;-;-;-;-;-;-;-;-;-;-;-;-;-;-;-	819	1.43236	2.0113	0.238981	0.946279	0.127348	1.17615	0.435512	0.471483	2.01599	1.9128	1.23634	0.806668	0.293526
1700012C08Rik	4;4	117213334;117213717	117213630;117213782	-;-	363	0.66535	1.58826	0.629054	0.381249	0.502813	0.995109	0.294781	0.354586	0.478786	0.539456	0.48815	0.248182	0
1700012C14Rik	6;6;6;6	30460128;30460985;30462961;30462961	30460251;30461129;30463313;30463261	+;+;+;+	622	0	0	0	0	0	0	0	0	0	0.314827	0	0	0
1700012D14Rik	7;7;7;7;7;7;7;7;7;7	111083064;111117636;111117673;111119248;111120908;111120908;111120908;111122383;111122508;111122508	111083522;111117889;111117892;111122681;111121023;111121023;111121023;111122675;111122537;111122684	-;-;-;-;-;-;-;-;-;-	4153	0.905572	0.694125	1.13109	0.466532	0.376707	1.49068	1.37418	0.45715	0.313869	0.966617	0.499821	0.455548	0.810393
1700012D16Rik	3;3	153296504;153298577	153297007;153298649	-;-	577	2.63109	3.23551	2.48756	0.863459	1.71721	3.33888	2.71995	0.892303	0.602425	0.33938	1.49164	1.35317	1.56238
1700012E03Rik	1;1	120435805;120437394	120436119;120438455	+;+	1377	0	0	0	0	0	0	0	0	0	0	0	0	0.0436451
1700012I11Rik	15;15;15;15;15;15;15;15;15	67226769;67239643;67251170;67251717;67285066;67336891;67337753;67372861;67376912	67227080;67239722;67251211;67251762;67285130;67336987;67337859;67372967;67377094	+;+;+;+;+;+;+;+;+	1039	0.132832	0.105695	0.376758	0.159838	0.0501914	0.231777	0.274637	0	0.0836379	0	0.0487278	0	0
1700012J22Rik	13	99641974	99642803	+	830	0	0	0	0	0.06283	0	0	0	0	0	0	0	0
1700012P22Rik	4;4;4;4	144418189;144419673;144423779;144438488	144418585;144419850;144423892;144438772	-;-;-;-	974	0	0	0	0	0	0	0	0	0	0	0	0	0
1700013A02Rik	5	148553217	148553861	-	645	0	0.170259	0	0	0	0	0.1106	0	0	0	0	0.0931164	0
1700013D24Rik	6;6;6;6;6;6	124347593;124347598;124356404;124356404;124356878;124356878	124347828;124347828;124356493;124356493;124357069;124357086	-;-;-;-;-;-	535	0	0	0.121947	0	0	0	0	0	0	0	0	0	0
1700013F07Rik	3;3;3;3;3;3;3;3;3	108534150;108537328;108537534;108537541;108542488;108542488;108543439;108544036;108544577	108534247;108537693;108537699;108537699;108543081;108542601;108543554;108544160;108544723	+;+;+;+;+;+;+;+;+	1452	2.51882	5.67237	1.93209	1.14375	0.754219	2.81948	1.08086	0.443233	1.01742	0.944048	1.74339	1.69591	0.703643
1700013G24Rik	4;4	137453284;137454486	137453355;137455461	+;+	1048	0	0	0	0	0	0	0	0	0	0	0	0	0
1700013H16Rik	X;X;X;X;X;X;X;X;X	53742901;53743352;53745653;53746942;53747823;53750014;53751023;53751510;53757762	53743186;53743456;53745751;53747041;53747940;53750048;53751086;53751856;53757831	-;-;-;-;-;-;-;-;-	1224	0	0.0448599	0.0533022	0	0	0	0	0	0.0709965	0	0.0413629	0	0
1700013M08Rik	5;5;5;5	102474290;102479199;102482564;102483220	102474813;102479996;102482652;102483289	-;-;-;-	1481	0.792104	1.18641	0.704841	0.710189	0.492967	0.650416	0.433513	0.782196	0.997499	1.05779	0.752073	1.01384	0.730445
1700013N06Rik	12;12;12;12;12	106837982;106838682;106866267;106877512;106878677	106838068;106838852;106866405;106877612;106878841	+;+;+;+;+	663	0	0	0	0	0	0	0	0	0	0	0	0	0
1700014D04Rik	13;13;13;13;13	59740842;59741956;59743707;59744868;59746703	59744022;59742750;59744022;59744921;59746752	-;-;-;-;-	3285	0.0840259	0.0167149	0.0397211	0	0.0158748	0.0549809	0.021716	0.0391826	0.0264535	0.0298055	0.0308238	0.0182831	0.0365902
1700014F14Rik	5;5	60940938;60945565	60941049;60945649	-;-	197	0	0	0	0	0	0	0	0	0	0	0	0	0
1700014L14Rik	8;8	18319523;18334291	18319955;18334338	-;-	481	0	0	0	0	0	0	0	0	0	0	0	0	0
1700015C17Rik	3;3;3	153467216;153475491;153478187	153467356;153475564;153478210	-;-;-	239	1.73237	2.75692	1.63787	0.926483	0.654588	4.2823	2.68633	1.34639	1.09079	0.40967	1.9065	1.25649	0.754385
1700015E13Rik	1;1	170308803;170311537	170308984;170312125	+;+	771	1.43204	1.49556	1.60778	0.646195	1.01457	2.10831	2.77576	1.16862	1.23981	1.7779	1.9043	1.32428	1.01335
1700015F17Rik	5;5;5;5;5;5;5;5;5;5;5;5;5;5;5;5;5;5;5	5437827;5437827;5437832;5450608;5450608;5450608;5452009;5452009;5452009;5455897;5455897;5457285;5457285;5457285;5466625;5466625;5475020;5478866;5478866	5437917;5437917;5437917;5450654;5450654;5450654;5452067;5452067;5452067;5455990;5455990;5457378;5457378;5457378;5466671;5466671;5475427;5479080;5479143	-;-;-;-;-;-;-;-;-;-;-;-;-;-;-;-;-;-;-	1118	0.061723	0	0	0.0990292	0	0	0.127615	0.0575647	0	0	0.135854	0.161163	0.0537561
1700015G11Rik	7;7;7;7;7;7;7;7;7;7;7;7;7;7;7	52011683;52011685;52011687;52011690;52013482;52013482;52013482;52014856;52014856;52014856;52014860;52015638;52015638;52015638;52015638	52011838;52011838;52011838;52011838;52013547;52013586;52013586;52014900;52014900;52014900;52014900;52015682;52015703;52015695;52015728	-;-;-;-;-;-;-;-;-;-;-;-;-;-;-	397	0.173819	0	0	0.139439	0	0	0.17969	0.162109	0	0	0.510107	0	0.151384
1700015O11Rik	6;6;6	113631649;113632362;113632939	113631909;113632572;113633144	-;-;-	678	0.305337	0.161972	0.0962269	0.081648	0.0769157	0.0887966	0.105217	0.189845	0.256341	0.433236	0.149346	0.974426	0.265926
1700016A09Rik	8	120536892	120537726	-	835	1.32228	1.1179	1.09388	1.79	1.99852	1.08151	1.70867	1.15612	1.87329	1.40711	1.51581	2.37363	1.94333
1700016B15Rik	7	118740449	118741181	-	733	2.82427	2.3971	2.49219	3.17191	3.8418	2.13548	1.36251	1.4926	1.06698	2.40437	3.10814	3.76912	3.19765
1700016C15Rik	1;1;1;1;1;1	177729814;177733475;177740995;177743254;177752916;177753172	177729961;177733552;177741090;177743426;177753035;177753324	+;+;+;+;+;+	768	0.539111	0.64346	0.339801	0.14416	0.543217	0.705517	0.27866	1.08938	1.81041	2.67726	0.593299	0.469219	0.234763
1700016D06Rik	8;8;8;8;8;8;8;8;8;8;8;8;8;8;8;8;8	11654924;11655478;11655479;11655480;11656109;11656109;11656109;11656109;11660542;11661672;11662590;11662590;11662590;11665036;11665036;11678576;11700991	11655681;11655681;11655681;11655681;11656189;11656189;11656189;11656189;11660735;11661755;11662604;11662773;11662691;11665098;11665098;11678750;11701063	-;-;-;-;-;-;-;-;-;-;-;-;-;-;-;-;-	1612	0.0856157	0.0340624	0.0404726	0.0343408	0.0647008	0	0	0.0399239	0	0	0.0314071	0.0372581	0.0372825
1700016D08Rik	16;16	3908825;3908857	3909192;3909192	-;-	368	2.81276	3.13337	1.77288	1.80513	2.69247	0.654392	1.1631	1.92373	1.65298	1.06425	2.75153	1.79527	1.46982
1700016F12Rik	5;5	96849505;96852460	96849680;96852938	+;+	655	0	0.0838299	0	0	0.159233	0.0919147	0	0.8843	0.132671	0.149483	0.15459	0	0
1700016G14Rik	13;13	24741232;24746059	24741560;24746592	+;+	863	0.0799609	0.381751	0.0755989	0.12829	0.24171	0.139523	0.0826616	0.074574	0.20139	0	0.0586653	0.139189	0
1700016G22Rik	13;13;13;13;13	5855508;5855508;5856851;5857613;5857999	5855951;5855951;5856906;5857712;5858092	-;-;-;-;-	694	0.0994327	0.158238	0	0.0797656	0	0	0	0.185468	0.626079	0.282165	0	0.0865419	0
1700016H13Rik	5;5;5;5;5;5;5;5;5;5;5;5;5;5;5;5;5;5;5;5;5;5;5;5;5;5;5;5	103648039;103648429;103648587;103648593;103648698;103648771;103648771;103649422;103649422;103649422;103649422;103649422;103649422;103649422;103654922;103654922;103654922;103654922;103654922;103654922;103654922;103655445;103655445;103655586;103655586;103655604;103655604;103655770	103648954;103648954;103648954;103648954;103648954;103648954;103648954;103649572;103649572;103649576;103649572;103649576;103649576;103649576;103655056;103655056;103655056;103655056;103655056;103655056;103655056;103655723;103655732;103655723;103655724;103655748;103655723;103656010	-;-;-;-;-;-;-;-;-;-;-;-;-;-;-;-;-;-;-;-;-;-;-;-;-;-;-;-	1751	0.157639	0.0627168	0.186299	0.126459	0.089347	0.171913	0.203703	0.0367546	0.0496286	0	0.0578277	0.137202	0.171614
1700016K19Rik	11;11	75999912;76003004	76000266;76003569	+;+	921	3.67134	9.24085	4.17945	4.2074	0.84933	6.01387	1.9364	0.6289	4.05721	5.5281	3.43568	4.4344	0.326272
1700016L21Rik	1;1;1;1;1;1	80445932;80445940;80450077;80475390;80476614;80479369	80445994;80445994;80450136;80475660;80476688;80479867	+;+;+;+;+;+	968	0	0	0	0	0.107746	0	0	0	0	0	0.104604	0	0
1700016P03Rik	11;11;11	75172560;75173978;75176993	75172597;75174161;75177633	+;+;+	863	4.83764	4.96277	4.38474	4.42602	4.71334	5.30187	4.87703	2.23722	3.22224	3.29018	3.93058	3.89729	5.223
1700016P04Rik	6;6	13413337;13415782	13413550;13415996	+;+	429	0	0	0	0	0	0	0	0	0	0	0	0	0
1700017B05Rik	9;9;9;9;9;9;9;9;9;9;9;9;9;9	57253117;57253610;57253876;57255592;57256386;57258684;57258774;57258957;57261221;57262429;57262429;57262429;57262429;57262429	57254329;57254329;57254329;57259140;57259140;57258932;57259140;57259140;57261509;57262597;57262547;57262601;57262599;57262612	-;-;-;-;-;-;-;-;-;-;-;-;-;-	5235	4.65314	5.10802	4.28714	13.1758	11.147	6.73918	4.36061	14.4143	25.2897	21.1159	13.8393	21.4541	24.0397
1700017D01Rik	19;19;19;19;19;19;19;19	11096816;11101804;11105677;11109354;11110308;11112316;11116407;11130486	11097067;11101924;11105796;11111876;11110361;11112459;11116516;11130876	-;-;-;-;-;-;-;-	3661	0.131943	0.059993	0.0356415	0.241933	0.0854666	0.0493341	0.0194856	1.74034	1.28178	1.43083	0.511675	0.229675	0.147745
1700017G19Rik	3;3;3;3;3;3;3;3	40504867;40506919;40508211;40508430;40509308;40513002;40521386;40522615	40506013;40507021;40508676;40508676;40509774;40513289;40521520;40522912	-;-;-;-;-;-;-;-	2904	0.0237625	0	0	0.0190624	0.0359152	0	0.0491301	0.13297	0.269317	0.134864	0.0348679	0.0413637	0.103477
1700017I07Rik	9;9	89802870;89805658	89802933;89806055	+;+	462	0	0	0	0	0	0	0	0.278603	0	0	0	0	0
1700017J07Rik	2;2	168978268;168978727	168978560;168978906	+;+	473	0	0	0	0	0	0	0	0	0	0	0	0	0
1700017L05Rik	5;5	77465488;77468624	77465817;77468851	+;+	558	0	0	0	0	0	0	0	0	0	0	0	0	0
1700017N19Rik	10;10;10;10;10;10;10;10;10;10;10;10;10;10;10;10;10;10;10;10;10;10;10;10;10;10;10;10;10;10;10;10;10;10;10;10;10;10;10;10;10;10;10;10;10;10;10;10;10;10;10;10;10;10;10;10;10;10;10;10;10;10;10;10;10;10;10;10;10;10;10;10;10;10;10;10;10;10;10;10;10;10;10;10;10;10;10;10;10;10;10;10;10;10;10;10	100590511;100591727;100592350;100592370;100592376;100592381;100592385;100592396;100592408;100594537;100594537;100594537;100594537;100594537;100594537;100594537;100595035;100595035;100595035;100595035;100595035;100595035;100595035;100595035;100601864;100601864;100601864;100601864;100601864;100601864;100601864;100602013;100603343;100603343;100603343;100603343;100603343;100603343;100603343;100603343…	100590645;100591914;100592429;100592429;100592429;100592696;100592429;100592429;100592696;100594656;100594656;100594656;100594656;100594656;100594656;100594656;100595155;100595155;100595155;100595155;100595155;100595155;100595155;100595155;100602022;100602022;100602022;100602022;100602022;100602022;100602022;100602022;100603420;100603420;100603420;100603420;100603420;100603420;100603420;100603367…	+;+;+;+;+;+;+;+;+;+;+;+;+;+;+;+;+;+;+;+;+;+;+;+;+;+;+;+;+;+;+;+;+;+;+;+;+;+;+;+;+;+;+;+;+;+;+;+;+;+;+;+;+;+;+;+;+;+;+;+;+;+;+;+;+;+;+;+;+;+;+;+;+;+;+;+;+;+;+;+;+;+;+;+;+;+;+;+;+;+;+;+;+;+;+;+	2326	0	0	0	0	0	0	0	0	0	0	0	0	0
1700018A04Rik	13;13;13;13;13;13;13;13;13;13;13;13;13	31565492;31567280;31567397;31567474;31578287;31579570;31579570;31579943;31579943;31579943;31582437;31582464;31582464	31565617;31567380;31567613;31567610;31579537;31579658;31579658;31580153;31580153;31580153;31582513;31582513;31582505	-;-;-;-;-;-;-;-;-;-;-;-;-	2072	1.03243	1.97427	1.82627	1.06867	0.666962	1.77242	1.54931	0.248484	0.6291	1.0396	0.537558	0.405811	1.21823
1700018A14Rik	18	46199021	46199731	+	711	0	0.154454	0	0	0	0.0846752	0	0	0	0	0	0	0
1700018B08Rik	8;8;8;8;8;8;8;8;8;8;8;8;8;8;8;8;8;8;8;8;8;8;8;8;8;8;8;8;8	121530780;121530828;121530828;121531698;121531698;121531698;121531814;121533695;121533695;121533695;121533695;121535423;121535423;121535423;121535423;121539867;121539867;121539867;121539867;121540529;121540529;121540529;121540537;121541719;121541719;121541719;121542170;121544004;121544291	121531041;121531041;121531041;121531914;121531914;121531914;121531914;121533731;121533731;121533731;121533731;121535569;121535569;121535569;121535569;121540007;121540007;121540007;121540007;121540580;121540580;121540576;121540580;121541869;121541869;121541954;121542221;121544123;121544320	-;-;-;-;-;-;-;-;-;-;-;-;-;-;-;-;-;-;-;-;-;-;-;-;-;-;-;-;-	1294	0.0533279	0.0424332	0	0	0.0403005	0.0465256	0	0	0	0	0	0.0464143	0
1700018B24Rik	3;3	48605732;48608698	48605919;48609102	-;-	593	0	0	0	0	0	0	0	0	0	0	0	0	0
1700018C11Rik	4;4;4;4;4;4;4;4;4;4	63607089;63607089;63608457;63608457;63611863;63611863;63612444;63612444;63622389;63622406	63607415;63607415;63608567;63608567;63611976;63611976;63612540;63612540;63622416;63622428	-;-;-;-;-;-;-;-;-;-	689	0	0.159386	0.0946906	0.321378	0.0756878	0.087379	0.103537	0.186814	0	0.142106	0.0734806	0.26151	0
1700018F24Rik	5;5;5;5;5	145042990;145043375;145044097;145044719;145045166	145043168;145043556;145044144;145044915;145045681	+;+;+;+;+	1122	0.0307515	0.0489381	0	0	0	0.107316	0.0635801	0	0.0774507	0	0.0902463	0	0
1700018G05Rik	X;X;X	102928372;102928653;102928944	102928463;102928795;102929094	+;+;+	386	0.178773	0	0.338041	0	0	0.155969	0	0.166729	0.225129	0	0	0.311192	0
1700018L02Rik	19	29046245	29048729	+	2485	4.1376	3.55746	3.01924	1.73757	1.57391	2.85879	2.75587	1.26902	0.979152	1.33963	2.0781	1.37764	1.45109
1700018M17Rik	4;4;4;4;4	59549154;59549359;59549393;59549496;59549560	59549354;59549388;59549491;59549555;59549625	+;+;+;+;+	456	9.53376	9.63308	13.449	19.4236	17.2686	14.5229	12.6717	20.8879	20.2004	18.0363	21.0951	21.7323	22.5373
1700019A02Rik	1;1;1;1;1;1;1;1;1;1;1;1;1;1;1;1;1;1;1	53158577;53158600;53163226;53163226;53170238;53170238;53170388;53170388;53177770;53177770;53181843;53181843;53182495;53182495;53185215;53185215;53187328;53187554;53187554	53158788;53158788;53163245;53163245;53170260;53170260;53170458;53170458;53177827;53177827;53181895;53181895;53182544;53182544;53185290;53185290;53187458;53187608;53187636	-;-;-;-;-;-;-;-;-;-;-;-;-;-;-;-;-;-;-	777	0.177622	0.28267	0.335865	0.14249	0.0671157	0.232448	0.183621	0	0.11184	0	0.130317	0.154595	0.309392
1700019A23Rik	7	30539666	30539861	+	196	3.16866	4.76248	1.9972	2.54192	1.86246	3.68597	1.45586	0.328354	0	0	0.774921	1.22572	1.53315
1700019B03Rik	8;8;8;8;8;8;8;8;8;8;8;8;8;8;8;8;8;8;8;8;8;8;8;8;8;8	3470862;3470862;3475831;3475835;3475849;3478986;3478986;3478986;3479180;3479180;3479180;3483460;3483460;3483460;3483661;3483661;3483661;3484052;3484052;3484052;3485658;3485658;3485658;3486931;3486931;3486931	3470933;3470937;3476407;3476407;3476407;3479089;3479089;3479089;3479280;3479280;3479280;3483572;3483572;3483572;3483770;3483770;3483765;3484253;3484253;3484253;3485743;3485743;3485743;3487181;3487178;3487178	+;+;+;+;+;+;+;+;+;+;+;+;+;+;+;+;+;+;+;+;+;+;+;+;+;+	1620	0.0532456	0.0338942	0.120818	0.0683424	0.0643813	0.111489	0.0880703	0.635629	0.804627	0.302195	0.0937559	0.278056	0.0370984
1700019B21Rik	X;X;X;X;X;X	62510539;62510539;62514435;62514435;62516039;62526828	62510998;62510998;62514537;62514537;62516069;62527011	-;-;-;-;-;-	778	0	0	0	0	0	0	0	0	0	0	0	0	0
1700019D03Rik	1;1;1;1;1;1;1;1;1;1;1;1;1;1;1;1;1	52922324;52922324;52922324;52925183;52925187;52925188;52925198;52952615;52953197;52963053;52971971;52990106;52991269;52991269;52992626;52992626;53020094	52925734;52925734;52925734;52925734;52925734;52925734;52925734;52952844;52953350;52963260;52972046;52990164;52991343;52991343;52992656;52992655;53020179	-;-;-;-;-;-;-;-;-;-;-;-;-;-;-;-;-	4330	0.366546	0.190214	0.256146	0.063923	0.0722617	0.444926	0.354213	0.163495	0.150519	0.0904492	0.181232	0.0762888	0.0485792
1700019E08Rik	2;2;2;2;2;2	45696605;45696799;45696800;45697029;45697987;45697987	45696629;45696833;45697142;45697142;45698447;45698067	+;+;+;+;+;+	830	0	0	0	0	0	0	0	0.077539	0	0	0	0	0
1700019G24Rik	6;6;6	5963909;5969130;5977292	5964171;5969267;5977393	-;-;-	503	0	0	0	0	0	0	0	0	0	0	0.100652	0	0
1700019M22Rik	12	96046767	96047120	-	354	0	0	0	0	0	0	0	0	0	0	0	0	0
1700019N19Rik	19;19;19;19;19;19;19;19;19;19;19;19	58785803;58785996;58786214;58786214;58787535;58787535;58789079;58789079;58792736;58792736;58792997;58794381	58786126;58786126;58786311;58786311;58787721;58787721;58789297;58789297;58792796;58792796;58793283;58794461	-;-;-;-;-;-;-;-;-;-;-;-	1257	0.109795	0.0873645	0	0.0880785	0	0.0957901	0.0567517	0	0.0691326	0	0.040277	0.191122	0
1700019O17Rik	1	86426329	86428052	+	1724	0.280188	0.191097	0	0	0.120995	0.0349212	0	0	0	0.0567931	0.0293667	0.0348376	0
1700019P21Rik	1;1	138876272;138876915	138876645;138876951	-;-	411	0	0	0	0	0	0	0	0	0	0	0	0	0
1700020A23Rik	2;2;2;2;2;2;2;2	130405259;130405265;130405286;130405426;130405504;130405781;130405781;130405781	130405289;130405289;130405703;130405703;130405703;130406018;130406070;130406074	+;+;+;+;+;+;+;+	739	0.0933779	0.222904	0.264852	0.112363	0.2117	0.285134	0.868785	0.391892	0.352773	0.529966	0.822108	0.365725	0.0406626
1700020D05Rik	19	5502767	5503787	-	1021	1.96002	1.39826	1.5975	1.19281	1.88982	1.94587	1.25765	0.504269	0.510674	0.191795	0.595042	1.35297	2.2368
1700020G17Rik	10;10;10;10;10;10;10;10;10;10;10;10;10	110784585;110801173;110812806;110835859;110836105;110893020;110893020;110893020;110893029;110896317;110896317;110896317;110896317	110784753;110801510;110813013;110836303;110836303;110893101;110893101;110893101;110893101;110896518;110896550;110896537;110896488	-;-;-;-;-;-;-;-;-;-;-;-;-	1476	0.187009	0.260406	0.707229	0.22503	0.388643	0.367098	0.628306	0	0	0	0.274407	0.203456	0.0407177
1700020I14Rik	2;2;2;2;2;2	119594297;119594303;119596259;119596259;119599588;119599588	119594434;119594434;119596342;119596511;119600746;119607502	+;+;+;+;+;+	8306	25.7548	30.2539	35.3092	17.2017	13.9162	37.4663	41.0793	7.53135	6.03151	8.47558	14.7935	14.9463	22.0434
1700020L24Rik	11;11;11;11;11	83437677;83440131;83440287;83440287;83440676	83437757;83440152;83440596;83440828;83441233	+;+;+;+;+	1050	6.96635	6.7982	7.76689	2.42518	2.28462	6.88047	6.11459	1.59361	1.40695	0.932488	3.32699	2.002	0.858562
1700020M21Rik	9;9;9	120913774;120914182;120915215	120914090;120914470;120915252	-;-;-	644	0	0.170523	0.202614	0	0	0	0	0	0.134937	0.304072	0	0	0
1700020N01Rik	10;10;10;10;10	21593145;21593332;21616320;21621646;21621646	21593234;21593572;21616393;21621765;21622376	+;+;+;+;+	1136	0	0	0.0574312	0.0974601	0.137717	0.0529966	0	0.113305	0.917955	0.344758	0.178268	0.845917	0.370331
1700020N15Rik	X;X	69945300;69945605	69945450;69945978	+;+	525	0	0.104588	0.24854	0.105443	0	0.0573372	0	0	0	0	0	0	0
1700020N18Rik	1;1;1	91404879;91405496;91405906	91405182;91405614;91406029	-;-;-	547	0.126154	0.501906	0	0.506009	0.0953361	0.440249	0.130415	0	0	0	0.740449	0.439196	0
1700021A07Rik	10;10;10;10;10;10;10	21419358;21419416;21419477;21425304;21425304;21425342;21426418	21419384;21419518;21419518;21425429;21425746;21425650;21426565	+;+;+;+;+;+;+	721	0	0	0	0	0	0	0	0	0	0	0	0	0
1700021F05Rik	10;10;10;10;10;10;10;10;10	43525133;43525159;43525702;43530598;43532676;43533154;43538125;43540940;43540940	43525408;43525408;43525843;43530670;43533157;43533455;43540966;43540994;43540968	-;-;-;-;-;-;-;-;-	4141	2.74125	2.66521	2.7729	1.69775	1.47342	2.70417	2.65295	1.47644	1.20665	1.39502	1.95617	1.58091	2.33663
1700021F07Rik	2;2;2;2	173522586;173526004;173527845;173528186	173522731;173526085;173527946;173528501	+;+;+;+	646	0	0	0	0	0	0	0	0	0	0	0	0	0
1700021F13Rik	5;5;5;5	119805329;119805333;119807588;119807685	119805612;119805612;119807667;119807869	-;-;-;-	549	1.0684	1.05016	0.653607	0.15125	0.664922	1.75458	0.844608	0.35168	0.316575	1.24841	0.691642	0.273498	0.985235
1700021J08Rik	4;4	117002166;117002844	117002571;117003012	-;-	575	12.0011	12.0321	9.30406	8.56835	11.6088	11.9361	7.81605	5.82015	2.41808	3.40561	10.6539	12.1165	7.63001
1700021L23Rik	4;4	124302837;124311329	124303429;124311461	-;-	726	0	0	0	0	0	0	0	0	0	0	0	0	0
1700021N21Rik	4;4;4	134448766;134449677;134449991	134449368;134449796;134450171	-;-;-	904	0	0	0	0	0	0	0	0	0	0.108309	0	0	0
1700021P04Rik	19;19	24064793;24066000	24064998;24066452	+;+	659	0	0	0	0	0	0	0	0	0	0	0	0	0
1700022A21Rik	5;5;5	24645453;24647496;24647684	24645535;24648860;24648734	+;+;+	1448	0	0	0	0	0	0	0	0	0	0	0	0	0
1700022A22Rik	15;15;15;15;15;15;15;15;15;15;15;15;15;15;15	46324559;46324571;46324585;46325612;46337261;46337261;46338524;46338524;46338524;46353905;46353905;46353905;46359709;46373777;46373777	46325119;46325119;46325119;46325957;46337348;46337348;46338618;46338618;46338618;46353977;46354006;46354006;46359892;46373858;46373907	+;+;+;+;+;+;+;+;+;+;+;+;+;+;+	1507	0	0	0	0	0	0	0	0	0	0	0	0	0
1700022E09Rik	16;16;16;16;16;16	59462909;59463931;59466870;59467997;59469185;59469185	59463018;59464099;59467061;59468137;59469238;59469204	-;-;-;-;-;-	666	0	0	0	0.0831191	0	0	0	0	0	0	0	0	0
1700022F17Rik	12;12	28469870;28474178	28470883;28474225	-;-	1062	0	0	0	0	0	0	0	0	0	0	0	0	0
1700022H16Rik	12;12;12;12	9565236;9565494;9570206;9570520	9565391;9565569;9570383;9570585	-;-;-;-	476	0	0	0	0	0	0	0	0.270409	0	0	0	0	0
1700022I11Rik	4;4;4;4;4;4;4;4;4;4;4;4	42969604;42969631;42969934;42969946;42969946;42970132;42970864;42970864;42970864;42970864;42977286;42983011	42969652;42969652;42970101;42970209;42970209;42970209;42971298;42974326;42971488;42971332;42977409;42983640	+;+;+;+;+;+;+;+;+;+;+;+	4542	10.202	12.1737	9.93997	12.8277	11.8144	9.68939	9.27443	8.94797	7.71996	8.61196	13.0973	13.4216	10.3672
1700022N22Rik	17;17	25985815;25987983	25986036;25988469	+;+	709	1.36261	0.851896	0.920195	1.09309	0.441316	1.86811	0.905546	0.544632	0.980533	2.07146	0.928302	1.18595	0.508598
1700023C21Rik	11;11;11	109845878;109847647;109848317	109846065;109847687;109848476	+;+;+	389	0.177394	0	0	0	0	0	0	0	0	0	0.260299	0	0
1700023F02Rik	10;10;10;10;10;10;10;10;10;10;10;10;10;10;10	66120605;66120605;66120609;66120609;66120676;66121951;66121951;66122915;66122915;66124037;66124037;66124037;66187606;66205493;66254162	66120843;66120843;66120843;66120843;66120843;66122032;66122032;66123076;66123091;66124071;66124064;66124050;66187669;66205600;66254223	-;-;-;-;-;-;-;-;-;-;-;-;-;-;-	767	0	0	0	0	0	0	0	0	0	0	0	0	0
1700023F06Rik	11;11;11;11;11;11;11;11;11;11;11;11;11;11;11;11;11;11;11;11;11;11;11;11;11;11;11;11;11;11;11;11;11;11;11;11;11;11	103198944;103198947;103199318;103199318;103199416;103199647;103199647;103199647;103200063;103200063;103200268;103200268;103200268;103200325;103200699;103200791;103200791;103200791;103200791;103201096;103201096;103201096;103201096;103201096;103201264;103201264;103201264;103201264;103201264;103201717;103201717;103201717;103201717;103208358;103208509;103208509;103208509;103208532	103199118;103199118;103199470;103199470;103199470;103199822;103199822;103199822;103200183;103200183;103200339;103200339;103200339;103200339;103200934;103200934;103200934;103200934;103200934;103201142;103201142;103201142;103201142;103201142;103201488;103201488;103201488;103201478;103201488;103201762;103201762;103201762;103201762;103208523;103208548;103208522;103208548;103208558	-;-;-;-;-;-;-;-;-;-;-;-;-;-;-;-;-;-;-;-;-;-;-;-;-;-;-;-;-;-;-;-;-;-;-;-;-;-	1452	0.047525	0.0756316	0.0898648	0.114375	0.215491	0.248777	0.0982602	0.753496	0.71818	0.33716	0.383547	0.78591	0.455298
1700023G09Rik	1;1;1;1;1	186926933;186926962;186928996;186928996;186929211	186927275;186927077;186930112;186929071;186929326	+;+;+;+;+	1460	0	0	0	0	0	0	0	0	0	0	0	0	0
1700023H06Rik	13;13	80884224;80885152	80884894;80885524	-;-	1044	21.9445	22.2737	21.4036	4.63962	3.89618	21.4232	24.1548	2.28087	1.58151	4.9237	4.99492	8.45674	6.76406
1700024B05Rik	14;14;14;14;14;14;14;14;14;14;14	41943995;41943995;41996171;41996171;41997289;41997289;41998102;41998102;41998236;42003057;42003057	41944329;41944329;41996333;41996333;41997420;41997420;41998282;41998234;41998282;42003821;42003819	+;+;+;+;+;+;+;+;+;+;+	1576	0	0	0	0	0	0	0	0	0	0	0	0	0
1700024B18Rik	14;14;14;14	123987635;123997088;124013691;124015557	123987735;123997232;124013739;124015684	+;+;+;+	423	0	0.129807	0	0.130868	0.123283	0	0	0	0	0	0	0	0
1700024G13Rik	14;14;14	32376502;32377852;32388256	32376661;32377971;32388373	-;-;-	398	5.54824	13.3822	4.09811	3.7554	0.524109	6.50446	1.97162	0	1.96507	0.984032	0.763239	1.50905	0.302007
1700024J04Rik	11;11	49586641;49588097	49588095;49588462	-;-	1821	0	0.030153	0.0358275	0.0100318	0	0	0.0195873	0.0353418	0	0	0	0	0
1700024P04Rik	13	98984085	98984565	-	481	0	0	0	0.230176	0	0	0	0.133799	0	0.203558	0	0	0.124947
1700024P16Rik	4;4;4;4;4;4;4;4;4;4;4;4;4;4;4;4;4;4;4;4;4;4;4;4;4;4;4;4;4;4;4;4;4;4;4;4;4;4;4;4	104913456;104913524;104945104;104945104;104948674;104948674;104950853;104950853;104978986;104978986;104986256;104986256;104988150;104988150;104988964;104988964;104990198;104990198;104995698;104995698;104995901;104995901;104999326;104999326;105000421;105000421;105002122;105002122;105003873;105003873;105010451;105010451;105013288;105013288;105015610;105015610;105015852;105015852;105016131;105016131	104913690;104913690;104945851;104945851;104948832;104948832;104950886;104950886;104979086;104979086;104986290;104986290;104988181;104988181;104989066;104989066;104990357;104990357;104995812;104995812;104995941;104995941;104999389;104999389;105000519;105000519;105002153;105002153;105003945;105003945;105010537;105010537;105013381;105013381;105015766;105015766;105015885;105015885;105016863;105016863	+;+;+;+;+;+;+;+;+;+;+;+;+;+;+;+;+;+;+;+;+;+;+;+;+;+;+;+;+;+;+;+;+;+;+;+;+;+;+;+	3136	1.03421	0.770401	0.624125	0.47661	0.36584	0.729514	0.659685	0.820885	1.6072	1.37375	1.06552	0.440492	0.421615
1700025A08Rik	5	67607218	67607826	-	609	0.339932	0	0.214259	0.0908988	0.171261	0	0	0.105677	0	0.160774	0.166267	0.0986208	0
1700025B11Rik	15;15;15;15	77558239;77558894;77559118;77561828	77558527;77559049;77559160;77561892	-;-;-;-	553	0	0	0	0	0	0.108868	0	0.116379	0.157142	0	0.274656	0	0
1700025C18Rik	2;2;2	165078693;165090290;165090700	165079057;165090575;165090750	-;-;-	702	0	0	0	0	0.148572	0	0.10162	1.00845	1.36168	0.557899	0.0721199	0	0.0856116
1700025D23Rik	11;11	114091406;114094956	114091870;114095336	+;+	846	0.0815677	0	0	0	0	0	0	0	0	0	0.0598442	0	0
1700025F22Rik	19;19;19;19;19;19;19;19;19;19;19;19;19;19;19;19;19;19;19;19;19;19;19;19;19	11139664;11139664;11139664;11139664;11141527;11141527;11141527;11141527;11142337;11142337;11142337;11142337;11146729;11146729;11146729;11146729;11159046;11163378;11163378;11163400;11164971;11164971;11165272;11165272;11165272	11139806;11139806;11139806;11139806;11141638;11141638;11141638;11141638;11142453;11142453;11142453;11142453;11146785;11146785;11146785;11146785;11159178;11163491;11163491;11163491;11165050;11165050;11165320;11165306;11165306	-;-;-;-;-;-;-;-;-;-;-;-;-;-;-;-;-;-;-;-;-;-;-;-;-	805	0	0	0.162092	0	0.194344	0.0747877	0	0.439709	0.4318	0.668959	0.408799	0.149218	0.29863
1700025F24Rik	10;10;10;10	119413444;119414585;119415119;119426472	119413619;119414662;119415365;119426864	+;+;+;+	894	0.540318	0.245676	0.29191	0.309605	0	0.0673424	0.15959	0	0	0	0.0566311	0.0671813	0
1700025G04Rik	1;1;1;1;1;1;1;1;1;1;1;1;1;1;1;1;1;1;1;1;1;1;1	151852403;151884524;151892903;151893237;151893322;151915482;151915482;151915482;151915482;151921047;151921047;151921047;151921047;151974352;151980426;151980426;151980426;152006545;152006545;152006545;152055247;152089932;152089932	151854344;151893432;151893432;151893432;151893432;151915542;151915542;151915542;151915542;151921123;151921227;151921123;151921123;151974488;151980520;151980520;151980520;152006767;152006767;152006767;152055292;152090125;152089970	-;-;-;-;-;-;-;-;-;-;-;-;-;-;-;-;-;-;-;-;-;-;-	11788	2.23035	2.3127	2.47397	2.25412	2.05711	2.52297	2.67786	1.77982	0.914113	1.1047	1.81244	1.41132	1.42499
1700025H01Rik	16;16	30195071;30199932	30195249;30200299	+;+	547	0	0	0	0	0	0	0.130415	0	0	0	0	0	0
1700025J12Rik	7;7	121589903;121591430	121590370;121591591	+;+	630	0.109534	0.0871564	0	0	0	0	0	0.102155	0	0	0	0.190667	0
1700025K24Rik	17;17;17	54352583;54358429;54369926	54353077;54358524;54370074	-;-;-	740	0	0	0	0	0	0	0	0	0	0	0	0	0
1700025L06Rik	7;7;7;7;7;7	46345771;46346453;46348274;46348636;46348636;46348636	46346244;46347337;46348345;46349373;46349064;46349054	-;-;-;-;-;-	2169	0	0	0	0	0	0	0	0	0.0801289	0	0	0	0
1700025M24Rik	5;5;5;5;5;5;5;5;5;5;5;5	73268581;73268581;73268599;73271656;73271656;73271656;73282057;73283043;73283043;73284123;73284123;73284123	73268953;73268976;73268953;73271794;73271794;73271794;73282171;73283099;73283099;73284181;73284187;73284175	-;-;-;-;-;-;-;-;-;-;-;-	772	0	0.0711251	0	0	0	0.0779846	0	0	0	0	0	0	0
1700025N21Rik	10;10	83139150;83141843	83139639;83142038	-;-	686	2.21303	1.60083	2.0923	1.9367	1.67241	2.0185	1.55985	1.78249	8.61397	7.27911	3.39489	7.09164	4.46803
1700025N23Rik	6;6;6;6	39063878;39064889;39065792;39067506	39064563;39064949;39065866;39067598	-;-;-;-	915	2.11167	1.74027	1.28345	3.81149	3.76156	2.69767	1.79317	10.8317	10.5419	8.07901	5.06282	4.72604	5.12322
1700025O08Rik	4;4	22928167;22938127	22928313;22938435	-;-	456	0	0	0	0	0	0	0	0	0	0	0	0	0
1700026D11Rik	2;2;2;2;2;2;2;2;2;2;2;2;2;2;2;2;2;2;2;2;2;2	132490634;132490716;132490716;132490728;132490744;132490744;132497369;132497369;132497369;132505761;132508206;132508206;132512075;132512075;132512075;132512075;132512075;132512075;132520280;132520280;132523717;132523717	132490963;132490797;132490797;132490963;132490963;132490797;132497491;132497491;132497491;132505871;132508274;132508274;132512217;132512217;132512300;132512299;132512340;132513902;132520406;132520406;132523858;132524057	+;+;+;+;+;+;+;+;+;+;+;+;+;+;+;+;+;+;+;+;+;+	2929	0.0471193	0	0	0	0	0.041109	0.0243554	0	0	0.0334282	0	0.0410106	0.0205187
1700026F02Rik	8;8;8;8;8;8;8;8;8;8;8;8;8;8;8;8;8;8;8	70948246;70948246;70956647;70956647;71006727;71006728;71010314;71010314;71010314;71010314;71021108;71026628;71026628;71026628;71042645;71042649;71042914;71042914;71085514	70948535;70948538;70956952;70956952;71006886;71006886;71010508;71010508;71010508;71010508;71021258;71026764;71026755;71026764;71042709;71042709;71043040;71043040;71085758	-;-;-;-;-;-;-;-;-;-;-;-;-;-;-;-;-;-;-	1679	0.0821992	0.0490547	0.116573	0.0494556	0.062119	0.0358571	0.169951	0.134158	0.103514	0.174946	0.0603075	0.0894284	0.0715895
1700026J12Rik	16;16;16;16;16;16;16;16;16;16;16;16;16;16;16;16;16	49210641;49210668;49216834;49216834;49216913;49219515;49219515;49221491;49221491;49224945;49224945;49227801;49227801;49238728;49238728;49255699;49255699	49210899;49210899;49216923;49216911;49216923;49219607;49219607;49221586;49221586;49225052;49225052;49227890;49227890;49239072;49239072;49255772;49255772	-;-;-;-;-;-;-;-;-;-;-;-;-;-;-;-;-	1155	0	0	0	0	0	0	0	0	0	0	0	0	0
1700026J14Rik	6;6	48536582;48536836	48536736;48537474	-;-	794	0.0869097	0.0691544	0	0	0.197036	0.0758238	0.17969	0	0.109446	0	0	0	0
1700027A07Rik	15;15	78911966;78913532	78912294;78913660	-;-	458	1.50669	1.55854	1.56694	1.69215	2.27724	1.8403	2.1806	0.84311	0.569212	1.49646	1.3265	2.62271	3.28053
1700027A15Rik	1;1;1;1;1;1;1;1;1;1;1;1;1	72984844;73015691;73016036;73017506;73017929;73022554;73022832;73024569;73024698;73025322;73025322;73025322;73025322	72985078;73015764;73016094;73017601;73017989;73022992;73022992;73024814;73024724;73025499;73025507;73025498;73025507	+;+;+;+;+;+;+;+;+;+;+;+;+	1396	0.0494314	0	0	0	0	0	0.0511009	0	0	0	0	0	0
1700027F06Rik	6;6	124363301;124364493	124363516;124364519	-;-	243	0	0	0	0	0	0	0	0.264845	0	0	0	0	0
1700027F09Rik	5;5;5	64454813;64462425;64467794	64455285;64462568;64467943	-;-;-	767	0	0	0	0	0	0	0	0	0.339895	0	0	0	0.0783564
1700027H10Rik	3;3;3;3	45416584;45419444;45430835;45439255	45416783;45419597;45431008;45439310	-;-;-;-	584	0	0	0	0	0	0	0	0	0.297602	0	0	0	0
1700027I24Rik	9;9;9;9;9;9;9	36668856;36668856;36689409;36689409;36691129;36692866;36692866	36669071;36669071;36689526;36689526;36691166;36693189;36693150	-;-;-;-;-;-;-	696	0	0	0	0	0.0749265	0	0	0.0924675	0	0.422031	0.145483	0	0
1700027J07Rik	10;10;10;10;10;10;10;10;10	43745809;43745856;43746158;43747654;43751922;43757281;43763497;43764796;43765727	43746655;43746655;43746655;43747778;43752880;43757569;43763685;43765058;43765836	+;+;+;+;+;+;+;+;+	2782	0.148827	0.13816	0	0.0198984	0.0562353	0.0649217	0	0.046267	0.124946	0.0351945	0.127389	0.151122	0.151221
1700027J19Rik	7;7;7;7;7;7;7;7	4151260;4151551;4151776;4164085;4164093;4164093;4164459;4164459	4151787;4151787;4151787;4164187;4164187;4164442;4164860;4164539	-;-;-;-;-;-;-;-	1288	2.83954	3.87941	3.64706	2.4928	1.94344	2.47734	2.99083	0.849438	0.472281	0.836198	1.96538	1.6787	2.56635
1700028B04Rik	7;7;7	28492550;28496903;28496941	28492709;28497713;28497495	+;+;+	971	0	0	0	0	0	0	0	0	0	0	0	0	0
1700028D13Rik	5;5;5;5;5;5;5	112206763;112206806;112207297;112209540;112209540;112209767;112209767	112206971;112206971;112207454;112209652;112209652;112210004;112210002	+;+;+;+;+;+;+	718	0.096109	0.0764743	0	0	0	0	0	0	0	0	0	0	0
1700028E10Rik	5;5;5;5;5;5;5;5;5;5;5;5;5;5;5;5;5;5;5;5;5	151368675;151368709;151368718;151380389;151380389;151380389;151388462;151394491;151400144;151406504;151406526;151407875;151407875;151408000;151413627;151413627;151424513;151428088;151428088;151430075;151430075	151368856;151368856;151368856;151380523;151380523;151382183;151388538;151396164;151400382;151406617;151406617;151408067;151408067;151408067;151413876;151414083;151424581;151428170;151428170;151432118;151430473	+;+;+;+;+;+;+;+;+;+;+;+;+;+;+;+;+;+;+;+;+	6927	0.508058	0.665847	0.414413	0.263721	0.361361	0.478017	0.396488	0.380923	0.338717	0.282694	0.292353	0.255778	0.182198
1700028I16Rik	10;10;10;10;10;10;10;10	82812123;82812123;82812176;82812297;82819031;82819031;82823517;82823517	82812171;82812359;82812292;82812359;82819123;82819123;82824242;82824242	+;+;+;+;+;+;+;+	1056	0	0	0	0	0	0	0	0	0	0	0	0.0568751	0.113825
1700028J19Rik	7;7;7;7;7;7;7;7;7;7;7;7;7;7;7	44229930;44229933;44229933;44230782;44230843;44230843;44231326;44231326;44231326;44232356;44232356;44232356;44235140;44236069;44236069	44230641;44230641;44230641;44230915;44230915;44230910;44231472;44231472;44231472;44232556;44232556;44232491;44236117;44236122;44236104	-;-;-;-;-;-;-;-;-;-;-;-;-;-;-	2177	0.126791	0.23961	0.0299687	0.127141	0.311408	0.0553092	0.0655369	0.0886873	0.0798344	0.224877	0.139536	0.220708	0
1700028K03Rik	5;5;5;5;5;5;5;5;5;5;5;5;5;5;5;5;5;5;5;5;5;5;5	107534709;107534720;107534737;107534757;107539130;107539130;107539130;107539130;107540954;107543920;107543920;107543920;107543920;107545688;107545688;107545688;107546201;107546201;107546201;107548117;107548117;107549085;107549085	107534808;107534808;107534808;107534808;107539223;107539223;107539223;107539223;107541161;107549022;107544013;107544013;107544013;107545856;107545856;107545856;107546279;107546279;107546279;107548220;107548377;107549214;107551542	+;+;+;+;+;+;+;+;+;+;+;+;+;+;+;+;+;+;+;+;+;+;+	7963	0.262142	0.291333	0.196635	0.198127	0.127703	0.32132	0.264277	0.1024	0.0654776	0.0614789	0.127159	0.120678	0.188683
1700028M03Rik	3;3;3;3;3	83555363;83556161;83560525;83561733;83574090	83555442;83556203;83560786;83561790;83574122	-;-;-;-;-	476	0	0	0	0	0	0	0	0	0	0	0	0	0
1700028N14Rik	11;11;11	103264860;103265313;103267338	103265112;103265398;103267745	-;-;-	747	2.35564	2.57269	2.62015	2.63077	3.73489	4.3521	1.86221	3.70464	2.79196	2.29377	3.65987	5.22611	4.78703
1700028P14Rik	19;19;19;19;19;19	23558760;23572485;23592109;23593027;23616519;23652575	23559037;23572542;23592177;23593145;23616624;23652812	-;-;-;-;-;-	868	2.30551	6.45239	1.6536	1.33929	0.120159	2.5663	0.986225	0.6673	3.20368	2.36882	1.74982	1.52226	0.276956
1700028P15Rik	2;2;2;2;2;2;2;2;2;2;2;2	171956879;171958188;171958189;171958294;171959439;171959439;171959439;171962017;171962017;171962502;171962502;171962750	171957159;171958443;171958443;171958443;171962114;171959586;171959586;171962131;171962114;171962824;171962630;171962799	-;-;-;-;-;-;-;-;-;-;-;-	3553	0	0	0	0	0	0	0	0	0	0	0	0	0
1700029B22Rik	7;7;7;7;7;7;7;7;7;7;7;7;7;7	131146439;131146444;131146482;131147635;131147635;131148401;131148401;131148401;131149528;131149528;131149528;131150215;131150215;131150215	131146528;131146541;131146528;131147673;131147673;131148523;131148523;131148523;131149595;131149595;131149595;131150558;131150580;131150580	+;+;+;+;+;+;+;+;+;+;+;+;+;+	699	0	0	0	0	0	0	0	0	0	0	0	0	0
1700029B24Rik	3	10241812	10242308	+	497	0.971919	2.09912	1.18144	0.334149	0	1.21135	0.57414	0.388475	0	0	0.611205	0.241691	0.483697
1700029E06Rik	5;5	58453039;58454651	58453153;58455292	+;+	757	0	0	0	0	0	0	0	0	0	0	0	0	0
1700029F12Rik	13;13;13	97021864;97030201;97034182	97022588;97030422;97034362	-;-;-	1128	0	0	0	0	0	0	0	0	0	0	0	0	0.106559
1700029H14Rik	8;8;8;8;8;8;8;8;8;8;8;8;8;8;8;8;8;8;8;8;8;8;8;8;8;8;8;8;8;8;8;8;8;8;8;8;8;8;8;8;8;8;8;8;8;8;8;8;8	13550733;13550733;13550733;13550733;13551011;13551648;13551648;13551648;13551648;13551648;13554654;13554654;13554654;13554654;13554654;13555925;13555925;13555925;13555925;13555925;13555955;13557652;13557652;13557652;13557652;13557652;13557652;13558625;13558625;13558625;13558625;13558625;13558759;13558759;13558759;13558759;13558759;13560082;13560082;13560082;13560082;13560082;13560082;13562159;135…	13551118;13551118;13551118;13551118;13551118;13551921;13551716;13551832;13551832;13551921;13554732;13554732;13554732;13554732;13554732;13555989;13555989;13555989;13555989;13555989;13555989;13557702;13557702;13557702;13557702;13557702;13557702;13558672;13558672;13558672;13558672;13558672;13558921;13558921;13558921;13558921;13558921;13560133;13560133;13560133;13560133;13560133;13560133;13562405;135…	-;-;-;-;-;-;-;-;-;-;-;-;-;-;-;-;-;-;-;-;-;-;-;-;-;-;-;-;-;-;-;-;-;-;-;-;-;-;-;-;-;-;-;-;-;-;-;-;-	1421	0.0485618	0.115922	0.0459126	0.136348	0.146795	0.0847348	0.200808	1.92483	2.2627	2.51496	1.60328	0.803055	0.422937
1700029I15Rik	2;2;2;2;2;2;2;2;2	92382538;92382918;92382918;92382918;92383208;92383208;92383448;92383448;92385427	92383603;92383113;92383051;92383051;92383281;92383281;92383603;92383589;92385708	+;+;+;+;+;+;+;+;+	1348	2.61077	3.13647	2.46835	2.46398	2.68868	2.90302	2.43435	2.14843	1.16038	1.45269	2.3286	1.73764	2.31837
1700029J03Rik	16;16;16;16;16;16;16	93391677;93396815;93397323;93397323;93425094;93425771;93458693	93391840;93397120;93397625;93397625;93425198;93425910;93458872	-;-;-;-;-;-;-	1198	0.172804	0.275001	0	0.369665	0.26118	0.150762	0	0	0	0.163458	0.76069	0.350935	0.125416
1700029J07Rik	8;8;8;8;8;8;8;8;8;8;8;8;8;8;8	45953606;45953608;45956397;45956397;45962254;45962254;45967856;45967856;45968027;45968027;45970354;45970354;45973504;45973504;45975079	45953812;45953812;45956566;45956566;45962433;45962433;45967931;45967931;45968164;45968164;45970573;45970573;45973680;45975252;45975252	-;-;-;-;-;-;-;-;-;-;-;-;-;-;-	2740	3.92882	7.73529	2.76206	1.57587	1.23711	5.38321	2.99407	0.634179	1.4589	2.03684	2.03252	2.47693	1.29411
1700029M03Rik	1;1;1;1	164960921;164960923;164961162;164962500	164961038;164961038;164961402;164962825	+;+;+;+	685	0	0	0	0	0	0	0	0	0	0	0	0.087679	0
1700029M20Rik	4;4;4;4;4;4;4;4;4;4	135626655;135626774;135626818;135627253;135627314;135627756;135627756;135627756;135627756;135627866	135627045;135627045;135627045;135627442;135627442;135627985;135627864;135628485;135630198;135628485	+;+;+;+;+;+;+;+;+;+	3024	0	0	0	0	0.017245	0	0	0	0	0	0	0	0
1700029N11Rik	13;13;13;13;13;13;13;13	44439712;44439727;44455212;44455212;44456285;44456288;44457441;44457441	44439853;44439861;44455291;44455291;44456510;44456510;44457566;44457569	+;+;+;+;+;+;+;+	585	0	0.281582	0	0.283884	0.26743	0	0	0.110013	0	0	0.0865439	0.205334	0.821872
1700029P11Rik	15	81980540	81981563	+	1024	0	0.107243	0	0	0	0	0	0.251396	0.169726	0.0956164	0.197766	0	0
1700030A11Rik	17;17;17	28905265;28905703;28906004	28905299;28905787;28906771	+;+;+	888	0	0	0	0.124679	0.234905	0	0	0.362373	0.29358	0.11026	0.114027	0.13527	0.270718
1700030C10Rik	12;12;12;12	20804381;20814257;20815346;20815346	20805681;20815727;20815471;20815779	-;-;-;-	2824	0.464277	0.66108	0.646874	0.411652	0.295461	0.17055	0.644154	0.467184	0.49235	0.329376	0.770896	0.740755	0.25538
1700030C12Rik	11;11;11;11;11;11;11;11;11;11	23497753;23497757;23497783;23498462;23498462;23498462;23498796;23498851;23499386;23499386	23497911;23497911;23497911;23498585;23498793;23498646;23499192;23499197;23499644;23499661	+;+;+;+;+;+;+;+;+;+	1169	4.95853	2.72429	3.73927	5.68253	6.78069	2.62653	3.11222	0.550534	0.520358	0.92132	0.82287	1.84958	2.15926
1700030C14Rik	2;2	152652883;152654083	152653390;152654330	-;-	756	0	0	0	0.146448	0	0.079635	0	0.255386	0.804627	0	0	0	0
1700030F04Rik	6;6;6;6;6;6;6;6;6;6;6;6;6	117646693;117646694;117647658;117647658;117679207;117702622;117702622;117702622;117717216;117751010;117751010;117751676;117751676	117646922;117646922;117647763;117647763;117679343;117702723;117702723;117702723;117717263;117751094;117751094;117751769;117751769	-;-;-;-;-;-;-;-;-;-;-;-;-	802	1.67783	1.12966	1.46428	1.00085	1.49554	1.16355	1.95687	1.60492	1.11929	0.732503	0.820656	1.38543	0.899242
1700030I03Rik	12	83122214	83123155	+	942	0.43953	0.116579	0.138518	0	0.166079	0.127822	0.151458	0	0.276751	0	0.107491	0.0637581	0.0637997
1700030J22Rik	8;8;8;8;8;8	116969594;116971108;116973452;116973452;116978775;116978779	116972156;116972156;116973699;116973699;116978959;116978943	-;-;-;-;-;-	2996	1.84262	2.84073	1.15414	1.64446	0.852902	1.38654	0.928618	0.429622	2.26241	2.28765	1.40258	1.34313	0.581736
1700030K09Rik	8;8;8;8;8;8;8;8;8;8;8;8;8;8;8;8;8;8	72443880;72443932;72444750;72444750;72449450;72449450;72451359;72451359;72455114;72455216;72457890;72457973;72457973;72458603;72458603;72458603;72460029;72460029	72443989;72443989;72445470;72445470;72449741;72449741;72451432;72451432;72455567;72455567;72458068;72458068;72458068;72458769;72458651;72458769;72460641;72461001	+;+;+;+;+;+;+;+;+;+;+;+;+;+;+;+;+;+	2970	4.41454	4.78832	4.08585	4.28693	3.93311	5.04741	3.53082	2.51362	2.25296	2.50547	2.86382	2.68956	3.05556
1700030L20Rik	3;3;3;3;3	136435270;136437625;136443663;136448480;136448959	136435560;136437682;136443796;136448590;136449349	-;-;-;-;-	985	0	0	0	0	0	0	0	0	0	0	0	0	0
1700030M09Rik	8;8;8;8;8;8	121544382;121544388;121545267;121547115;121547115;121548211	121544722;121544722;121545357;121547259;121547652;121548342	+;+;+;+;+;+	1102	0	0.149479	0.0592031	0	0	0.0546317	0	0.0584005	0.0788564	0	0.0459421	0.054501	0.0545366
1700030N03Rik	19;19;19;19;19;19;19;19;19;19;19;19;19;19;19;19;19;19;19;19;19;19	3065711;3069367;3072688;3075714;3145870;3145946;3149813;3153208;3153799;3153931;3153931;3153931;3159930;3159941;3196945;3196945;3196945;3196945;3197605;3197605;3197605;3197605	3068149;3069440;3072953;3075885;3146265;3146265;3150006;3153401;3154009;3154009;3154009;3154009;3160181;3160190;3197029;3197029;3197029;3197029;3197703;3197698;3197698;3197714	-;-;-;-;-;-;-;-;-;-;-;-;-;-;-;-;-;-;-;-;-;-	4402	0	0.0124735	0.014821	0.0125755	0.0118466	0	0.0162056	0.0219301	0.0657374	0.0667273	0.0460047	0.0136438	0
1700030N18Rik	5	134090486	134091451	-	966	0	0	0	0	0	0	0	0	0	0	0.0524101	0	0
1700030O20Rik	10;10;10	116723067;116723536;116729077	116723256;116723838;116729177	-;-;-	594	0	0	0	0	0	0	0	0	0	0	0	0	0
1700031A10Rik	17;17;17	36923792;36925353;36932943	36923848;36925461;36933432	+;+;+	656	0	0	0	0	0	0	0	0	0	0	0.154354	0	0
1700031F05Rik	X;X;X;X;X;X;X;X;X;X;X;X;X;X;X	102859186;102859186;102859665;102860746;102860746;102861142;102861142;102864145;102864145;102864654;102864654;102865015;102865015;102866214;102867889	102859250;102859757;102859757;102860977;102860977;102861208;102861208;102864281;102864281;102864712;102864712;102865168;102865168;102866353;102867971	-;-;-;-;-;-;-;-;-;-;-;-;-;-;-	1444	0	0	0	0	0	0	0	0	0	0	0	0	0
1700031F10Rik	6;6;6;6	88222602;88222604;88223554;88225651	88223126;88223126;88223639;88225678	-;-;-;-	639	0	0	0	0	0	0	0	0.251789	0	0	0	0	0
1700031L13Rik	5;5;5;5;5;5;5;5	82122408;82122427;82122437;82122686;82123211;82123292;82124596;82124606	82123114;82123114;82123114;82123114;82123337;82123345;82124713;82124710	-;-;-;-;-;-;-;-	960	0	0	0	0	0	0	0	0	0	0	0	0	0
1700031M16Rik	15;15;15;15;15;15;15;15;15;15;15;15;15;15;15;15;15;15;15;15;15;15;15;15;15;15;15;15;15;15;15;15;15;15;15;15;15;15;15;15;15;15;15;15;15;15;15;15;15;15;15;15;15;15;15;15;15;15;15;15;15;15;15;15	98398419;98398426;98398445;98398445;98398445;98398445;98398445;98399001;98399001;98399001;98399001;98399001;98401769;98401769;98401769;98401769;98401769;98401769;98401769;98402232;98402232;98402232;98402232;98402232;98402232;98402232;98406874;98406874;98406874;98406874;98406874;98406874;98406874;98409588;98409588;98409588;98409588;98409588;98409588;98411974;98411974;98411974;98411974;98411974;984…	98398487;98398487;98398487;98398487;98398487;98398487;98398487;98399087;98399087;98399087;98399087;98399087;98401796;98401796;98401796;98401796;98401796;98401796;98401796;98402270;98402270;98402270;98402270;98402270;98402270;98402270;98406906;98406906;98406906;98406906;98406906;98406906;98406906;98409612;98409612;98409612;98409612;98409612;98409612;98412025;98412025;98412025;98412025;98412025;984…	+;+;+;+;+;+;+;+;+;+;+;+;+;+;+;+;+;+;+;+;+;+;+;+;+;+;+;+;+;+;+;+;+;+;+;+;+;+;+;+;+;+;+;+;+;+;+;+;+;+;+;+;+;+;+;+;+;+;+;+;+;+;+;+	1666	0	0	0	0	0	0.0722738	0	0	0	0	0	0	0
1700031P21Rik	12;12;12;12;12;12;12;12;12	52599981;52601595;52601613;52601990;52601990;52601990;52602180;52602180;52602180	52600078;52601852;52601852;52602058;52602055;52602055;52602318;52602319;52602322	-;-;-;-;-;-;-;-;-	568	0.12149	0	0	0	0	0	0	0	0	0	0	0	0
1700034B16Rik	18;18	75781032;75781998	75781447;75782303	+;+	722	0	0	0	0	0	0	0	0	0	0	0	0	0
1700034E13Rik	18;18;18;18;18;18;18	52646209;52646216;52656497;52660391;52660391;52663567;52663567	52646306;52646306;52656540;52660571;52660571;52663733;52663733	+;+;+;+;+;+;+	490	0.140829	0.336175	0.266293	0.112974	0.106426	0.122866	0.291171	0	0.532039	0.399638	0.929905	0.367715	0
1700034G24Rik	5;5;5;5;5;5;5;5;5;5	112582936;112583018;112584033;112584033;112585932;112585932;112586304;112586304;112589874;112589874	112583446;112583446;112584176;112584207;112586096;112586096;112586410;112586410;112589996;112589996	-;-;-;-;-;-;-;-;-;-	1081	0	0	0	0	0	0	0	0	0	0	0	0	0
1700034H15Rik	1;1;1;1;1;1;1;1;1;1;1;1;1;1;1;1;1;1	191886130;191890231;191890233;191890422;191894072;191898273;191898618;191898618;191899150;191899970;191900680;191900680;191900680;191901562;191903542;191903542;191907060;191907060	191886172;191890644;191890644;191890644;191897128;191898826;191899129;191898826;191899256;191900918;191900918;191900918;191900886;191901721;191903585;191903585;191907527;191907519	-;-;-;-;-;-;-;-;-;-;-;-;-;-;-;-;-;-	6099	0.792005	0.819262	0.7488	0.87134	0.786636	0.473815	0.619914	0.569815	0.455942	0.449502	0.747095	0.728717	0.266057
1700034I23Rik	3	40900196	40902543	-	2348	0.529009	0.502783	0.639081	0.365434	0.299834	0.611015	0.288629	0.465961	0.666182	0.166799	0.517494	0.243003	0.315598
1700034J04Rik	12	11221461	11222210	-	750	0	0	0	0	0	0	0	0	0	0	0	0	0
1700034J05Rik	6;6;6;6;6;6	146950329;146951302;146952886;146952886;146954289;146954289	146952500;146952497;146953586;146953586;146954422;146954414	-;-;-;-;-;-	3007	1.5605	1.36952	1.47537	1.56481	1.35271	1.66177	1.25735	1.77641	1.90734	2.27928	1.51531	1.22837	1.57893
1700034K08Rik	9;9;9;9;9;9;9;9;9;9;9;9;9;9	92979914;92979914;92979995;92980726;92980726;92980726;92990668;93001620;93003805;93003805;93003805;93005684;93005684;93005684	92980255;92980255;92980255;92980853;92980853;92980853;92990733;93001719;93003936;93003903;93003936;93005730;93005733;93005739	-;-;-;-;-;-;-;-;-;-;-;-;-;-	824	0	0	0	0	0	0	0	0	0	0	0	0	0
1700034O15Rik	6;6	41684431;41685215	41684668;41685717	+;+	741	0	0	0	0	0	0	0	0.173704	0.351821	0.132134	0.0683241	0	0
1700034P13Rik	1;1;1;1;1;1;1;1;1;1;1;1;1;1;1;1;1;1;1;1;1;1;1;1;1;1;1;1;1;1;1;1	9747648;9747956;9748481;9748587;9748589;9748626;9750358;9750358;9751809;9752449;9752449;9752449;9752449;9752449;9752449;9770672;9770672;9770672;9770960;9770960;9780333;9780730;9781533;9783778;9789656;9789656;9789656;9789656;9791125;9791125;9791125;9791125	9748604;9748604;9748604;9748645;9748645;9748645;9750405;9750405;9751928;9752564;9752564;9752564;9752564;9752564;9752564;9770751;9770795;9770795;9771095;9771256;9780431;9780813;9781608;9783991;9789780;9789780;9789780;9789780;9791164;9791924;9791318;9791922	+;+;+;+;+;+;+;+;+;+;+;+;+;+;+;+;+;+;+;+;+;+;+;+;+;+;+;+;+;+;+;+	3101	3.31568	2.79766	2.59831	4.76634	4.71711	3.06748	2.80264	5.16768	6.10904	3.78889	3.82038	4.31906	3.62418
1700036A12Rik	9;9;9;9;9	60743120;60746013;60768670;60768848;60769602	60743302;60746153;60768744;60770276;60769955	+;+;+;+;+	1828	0.113249	0	0	0.030283	0	0.0329344	0.0390246	0	0	0.0535619	0.0276959	0	0
1700036G14Rik	3;3;3	85317519;85330959;85331863	85317560;85331290;85332030	+;+;+	542	0	0	0	0	0	0	0	0	0	0	0	0	0
1700036O09Rik	X;X	67458196;67459164	67458504;67459203	+;+	349	0	0	0	0	0	0	0	0	0	0	0	0	0
1700037C06Rik	4	137116709	137117582	-	874	0	0	0	0	0	0	0	0	0	0	0	0	0
1700037C18Rik	16;16;16;16;16;16;16;16;16;16;16;16;16;16;16;16;16;16;16;16	3895179;3895181;3897229;3897229;3904303;3905798;3906258;3906841;3906841;3906841;3906841;3906904;3907013;3907615;3907615;3907645;3907999;3908450;3908605;3908605	3895414;3895414;3897313;3897345;3906300;3906300;3906300;3907194;3907194;3907194;3907194;3907194;3907194;3907651;3907757;3907702;3908137;3908689;3908623;3908653	-;-;-;-;-;-;-;-;-;-;-;-;-;-;-;-;-;-;-;-	3227	5.81646	7.14645	5.55981	6.87893	6.01966	6.49242	6.0129	4.25792	3.98549	3.88368	6.96588	7.6122	6.63011
1700037F24Rik	1;1	132201069;132203254	132201491;132203803	-;-	973	0	0.0564322	0	0.398254	0.321576	0.371248	0.0733165	0	0.267933	0.100628	0.416264	0.678994	0.926506
1700037H04Rik	2;2;2;2;2;2;2;2;2;2;2;2;2;2;2;2;2;2;2;2;2;2;2;2;2;2;2;2;2;2;2;2;2;2;2;2;2;2;2	131146324;131146325;131146325;131146794;131146804;131147161;131147161;131147161;131147161;131147161;131147161;131148156;131148156;131148156;131148156;131148156;131148156;131148281;131149441;131149441;131151618;131151618;131151618;131151618;131151618;131151618;131153585;131153594;131153594;131153594;131153594;131153594;131155642;131159953;131159953;131159953;131159953;131159953;131159953	131146975;131146975;131146975;131146975;131146975;131147283;131147283;131147283;131147283;131147283;131147283;131148294;131148294;131148294;131148294;131149028;131148294;131148294;131149542;131149542;131151760;131151756;131151756;131151760;131151760;131151760;131153710;131153710;131153710;131153710;131153710;131153710;131155779;131160042;131160081;131160042;131160024;131160020;131160034	-;-;-;-;-;-;-;-;-;-;-;-;-;-;-;-;-;-;-;-;-;-;-;-;-;-;-;-;-;-;-;-;-;-;-;-;-;-;-	2286	9.8106	11.3012	10.1102	9.32309	10.1515	7.63744	10.142	4.4763	3.26919	3.51213	6.20118	6.2267	5.02143
1700039E22Rik	19;19;19	44828493;44832703;44835491	44828692;44832824;44835938	-;-;-	770	0	0	0	0	0	0	0	0	0	0	0	0	0
1700039I01Rik	1	63248021	63248499	-	479	0	0	0	0	0	0	0	0	0	0	0	0	0
1700039M10Rik	14;14	57571624;57571909	57571685;57572368	+;+	522	0.132196	0.105189	0.124984	0.424194	0.199804	0	0.136661	0	0.332949	0	0	0.115058	0.230266
1700039M15Rik	9;9	107241220;107242906	107241247;107243997	+;+	1120	0	0	0.174755	0.296557	0.0465615	0.0537537	0	0.229848	1.08625	0	0.135611	0.375376	0.268301
1700040D17Rik	3;3	94409395;94412694	94410166;94412919	-;-	998	0.484012	0.110037	0	0.0554683	0.0522534	0.120649	0.28592	0	0.0870739	0	0.0507296	0.0601805	0.301099
1700040F15Rik	Y;Y;Y;Y;Y;Y;Y;Y;Y;Y	61102247;61103655;61115111;61115728;61122793;61123419;61130587;61131455;61133569;61134026	61102290;61103786;61115177;61115762;61122859;61123453;61130704;61131554;61133667;61134259	+;+;+;+;+;+;+;+;+;+	931	0	0	0	0	0	0	0	0	0	0	0	0	0
1700040F17Rik	15;15	55436115;55438829	55436739;55439020	-;-	817	0.084463	0	0.0798554	0.0677569	0	0.0736892	0	0	0	0	0	0	0
1700040K01Rik	1	152936604	152937041	+	438	0	0	0	0	0	0	0	0	0	0	0	0	0
1700040L02Rik	10;10;10;10;10;10;10;10;10;10;10;10;10	68430953;68436280;68436280;68436843;68436843;68509697;68509697;68516266;68516266;68525598;68525598;68533812;68541747	68431323;68436420;68436420;68436965;68436965;68509769;68509769;68516410;68516410;68525767;68525767;68533900;68541896	-;-;-;-;-;-;-;-;-;-;-;-;-	1262	1.74976	4.00284	1.49922	0.833431	0.785126	2.81461	1.18706	0.254982	0.688587	1.16376	1.24364	0.475912	0.714335
1700040L08Rik	6;6	71543192;71543938	71543555;71544114	-;-	541	22.1943	19.7914	21.9483	13.9161	15.423	21.7002	25.9767	15.3458	10.1196	10.8589	17.7807	20.0385	17.8854
1700041C23Rik	9;9;9;9;9;9	57175275;57178320;57179946;57181294;57184329;57186040	57175375;57178378;57179970;57181394;57184368;57186108	+;+;+;+;+;+	395	0	0	0	0.140145	0	0	0	2.11809	3.95999	0.991506	0.897208	0.304102	0.304301
1700041G16Rik	8;8;8	22805766;22807836;22808275	22805887;22809537;22808732	+;+;+	1824	0.226994	0.301034	0.107306	0.242795	0.428856	0.19804	0.195551	0.987942	1.04813	0.751512	0.471863	0.559771	0.461289
1700041M05Rik	4;4	125228597;125241991	125228840;125242052	+;+	306	0	0	0	0	0.170421	0	0	0.210318	0.283986	0.959914	0.165452	0.785099	0.982016
1700041M19Rik	16;16;16;16;16;16;16;16;16;16;16;16;16;16;16;16;16;16;16;16	76819583;76821402;76827837;76834383;76834390;76835066;76835066;76847728;76847728;76874127;76889005;76889005;76985998;77004228;77007059;77007288;77010838;77010838;77010838;77010838	76820027;76821519;76827960;76834531;76834531;76835116;76835116;76847845;76847845;76874249;76889281;76889295;76986151;77004903;77007696;77007696;77010875;77010879;77010881;77010897	-;-;-;-;-;-;-;-;-;-;-;-;-;-;-;-;-;-;-;-	2947	0	0	0	0	0	0.0102145	0	0	0	0	0	0	0
1700042D02Rik	9;9	49051335;49055348	49051605;49055465	-;-	389	0	0	0	0	0	0	0	0	0	0	0	0	0
1700042G07Rik	4;4	116173372;116174164	116173629;116174290	+;+	385	0	0	0	0	0	0	0	0	0	0	0	0	0
1700042G15Rik	4;4;4;4;4;4;4;4	57360868;57361192;57361294;57362075;57362122;57364034;57364034;57364034	57360901;57361417;57361417;57362219;57362219;57364273;57364292;57364252	-;-;-;-;-;-;-;-	664	0	0	0	0	0	0.0906688	0	0.0969238	0	0.147457	0	0	0.271533
1700042O10Rik	11;11;11;11	11868123;11870964;11882957;11884640	11868199;11871156;11883079;11885321	+;+;+;+	1075	0	0	0	0	0	0	0	0.419071	0.606277	0.364321	0.047096	0	0.0559064
1700044C05Rik	14;14;14;14;14;14	118365878;118367282;118367624;118390001;118394601;118397831	118366119;118367341;118367696;118390107;118394676;118398170	+;+;+;+;+;+	898	0	0	0	0	0	0	0	0	0	0	0	0	0
1700044K03Rik	18;18	49523289;49524133	49523357;49524440	+;+	377	0	0	0	0	0	0	0	0	0	0	0	0	0
1700045H11Rik	4;4;4;4	150828225;150849787;150852571;150854826	150828481;150849909;150852659;150854949	-;-;-;-	593	0	0.462973	0.44008	0.653459	0	0.101525	0.481193	0	0.293085	0.165112	0	0.405127	0
1700045I11Rik	4	42170845	42171337	+	493	0	0	0	0	0.0528893	0	0	0	0	0	0	0	0
1700046C09Rik	11;11;11;11	14560355;14577922;14578212;14599148	14560599;14578029;14578323;14599225	-;-;-;-	543	0	0	0	0	0	0	0	0	0	0	0	0	0
1700047A11Rik	8;8;8;8;8;8;8;8;8	26082609;26082616;26087012;26087012;26088912;26088912;26089094;26095787;26096305	26082735;26082735;26087032;26087032;26088998;26088998;26089292;26095955;26096522	+;+;+;+;+;+;+;+;+	821	8.90946	11.5703	14.5821	7.07981	6.03428	14.2261	15.3796	6.34951	5.7157	7.03625	9.31164	7.16917	10.2484
1700047F07Rik	4;4;4;4;4;4;4;4;4;4;4;4	107689701;107689733;107705623;107705623;107707034;107707057;107708479;107708479;107715217;107715217;107716881;107758959	107689738;107689738;107705898;107705898;107707377;107707276;107708587;107708644;107715338;107715338;107716957;107758985	+;+;+;+;+;+;+;+;+;+;+;+	1050	0	0	0	0	0	0	0	0.0612928	0.0827617	0.0932488	0	0	0
1700047G03Rik	15;15;15;15;15;15;15;15;15;15;15;15;15	11964276;11964337;11964424;11967062;11967100;11967814;11967814;11967814;11967814;11969470;11969470;11969470;11969470	11964526;11964526;11964651;11967196;11967196;11967904;11967904;11967904;11967904;11969505;11969474;11970083;11970068	+;+;+;+;+;+;+;+;+;+;+;+;+	1216	0.0567486	0	0.0536528	0.136572	0	0.0990199	0.11733	0	0.142927	0	0.041635	0	0.0988476
1700047I17Rik2	12;12;12;12;12	55199533;55205680;55210732;55212182;55213840	55199786;55205853;55210798;55212279;55214076	+;+;+;+;+	830	21.5798	21.2066	22.3677	14.9952	16.6267	20.6188	20.6353	24.6225	21.1993	36.7427	29.296	24.3555	23.0499
1700047K16Rik	11;11	58322988;58323720	58323153;58324439	+;+	886	3.6606	2.72684	2.87182	1.68696	2.0012	3.05777	2.81805	0.871658	1.47121	1.2156	1.4857	1.89806	2.03497
1700047L14Rik	5;5;5	108763842;108767002;108768629	108763932;108767135;108768914	+;+;+	511	0	0	0	0	0	0	0	0	0	0	0	0	0
1700047M11Rik	1;1;1;1;1	182287990;182297909;182300834;182301073;182302969	182288230;182298021;182301198;182303325;182303287	+;+;+;+;+	2846	0.0727403	0.0578797	0.0229241	0.0389019	0.0549707	0.0846157	0.0501314	0.384426	0.519078	0.309628	0.444731	0.232137	0.29564
1700047N06Rik	1	10057025	10057944	-	920	1.0501	1.0743	0.56732	0.722052	0.510152	0.785271	0.930482	0.0699537	0.283369	0.851402	0.660367	0.195848	0.718579
1700047O18Rik	7	12780860	12781602	+	743	0	0	0	0	0	0	0.096012	0	0.116958	0.131778	0	0	0
1700048F04Rik	5;5	125928770;125951884	125929086;125952630	+;+	1064	0	0	0	0	0	0	0	0	0	0	0	0	0
1700048M11Rik	16;16	92308716;92312348	92309079;92312468	-;-	485	2.9879	2.71712	1.61423	0.798972	0.860188	1.24132	2.05921	0.265391	0.537524	0.403758	1.04388	2.22903	1.73483
1700048O20Rik	9;9;9;9;9;9;9;9;9;9;9;9;9	121937223;121937976;121938116;121938135;121939419;121939419;121939419;121940684;121940684;121940684;121941799;121945611;121945611	121937319;121938162;121938162;121938162;121939501;121939501;121939501;121940810;121940810;121940810;121941997;121947014;121947016	+;+;+;+;+;+;+;+;+;+;+;+;+	2099	0.0328758	0.156956	0.233118	0.250545	0.198757	0.186435	0.390841	0.122644	0.227703	0.0699699	0.289442	0.100148	0.286324
1700049E15Rik	6;6;6;6;6;6;6	147690241;147694727;147694978;147694981;147701088;147701970;147701970	147690498;147694849;147695041;147695041;147701284;147702374;147702348	+;+;+;+;+;+;+	1047	0	0.104887	0	0	0	0	0	0	0	0	0.0483555	0.057364	0
1700049E17Rik1	14;14;14;14;14	41924949;41925833;41926941;41927753;41931914	41925104;41925995;41927072;41927934;41933041	+;+;+;+;+	1761	0	0	0	0	0	0	0	0	0	0	0	0	0
1700049E17Rik2	14;14;14;14;14;14;14;14;14;14	41570696;41571792;41573141;41573342;41574095;41574095;41575203;41575203;41576015;41576015	41570765;41571819;41573301;41573366;41574257;41574257;41575334;41575334;41576319;41576186	+;+;+;+;+;+;+;+;+;+	884	0	0	0	0	0	0	0	0	0	0	0	0	0
1700049E22Rik	6;6;6;6	100527400;100529619;100533065;100533305	100527639;100529697;100533130;100533426	+;+;+;+	507	0	0	0	0	0	0	0	0	0	0.386238	0	0	0
1700049J03Rik	17;17	26554254;26561292	26554466;26561499	-;-	421	0	0	0	0.26298	0	0	0	0.152868	0.412825	0	0.240514	0.285321	0
1700049L16Rik	10	71979890	71980694	-	805	0	0	0	0	0	0	0	0	0	0	0	0	0
1700051A21Rik	11;11;11;11;11	72266421;72266844;72267881;72267881;72268346	72267525;72267525;72268061;72268557;72268575	+;+;+;+;+	1800	0	0	0	0	0	0	0	0	0.0482776	0	0	0	0
1700051K13Rik	6	134245671	134246366	-	696	0.594882	1.02559	1.40607	3.57914	1.72331	2.1625	1.22995	3.60623	5.49366	6.33047	2.6187	2.32992	3.45399
1700051O22Rik	8;8	85432686;85432686	85433323;85433315	+;+	638	2.48769	1.72127	2.86328	1.64857	1.7165	2.26473	2.12445	1.31136	0.544826	0.613864	2.49967	2.63587	1.83689
1700052I22Rik	12;12	80923432;80924228	80923588;80924449	-;-	379	0.182075	0	0	0	0	0	0	0.679234	0.458574	0.258341	0	0	0
1700052K11Rik	11	105177726	105181433	-	3708	1.33993	1.76217	2.09379	1.1794	1.30794	1.70481	1.61605	1.14552	1.3124	1.18824	1.43365	1.21481	1.8153
1700054A03Rik	19;19;19;19;19	53076218;53076252;53079193;53083999;53083999	53076445;53076445;53079384;53084392;53084392	+;+;+;+;+	814	0.0847743	0.0674552	0	0	0	0.295843	0.175275	0	0	0	0.0621968	0	0.0738321
1700054K02Rik	1	92572374	92572749	-	376	0	0	0	0	0	0	0	0	0	0	0	0	0
1700054K19Rik	6;6;6	112210708;112211518;112212190	112210764;112211582;112212519	+;+;+	452	0	0	0	0	0	0	0	0	0	0	0	0	0
1700054M17Rik	2;2;2	118304914;118305877;118307827	118304935;118305959;118308166	+;+;+	445	0.15507	0	0	0.373196	0.351565	0.13529	0	0	0	0.220025	0.227542	0.269933	0.810328
1700054O19Rik	14	25706406	25707273	-	868	0.477002	0.253035	0.22549	0	0.120159	0.554876	0.246556	0.741445	0.300345	0.338403	0.291637	0.276775	0.138478
1700055C04Rik	9;9;9	64038465;64038880;64041307	64038620;64038919;64041465	-;-;-	355	0	0	0	0	0	0	0	0	0	0	0	0	0
1700055D18Rik	4;4	45011687;45012830	45015406;45014399	+;+	3720	0.537952	0.79706	0.719063	0.505954	0.616815	0.631172	0.498591	0.761216	0.794245	0.552725	0.748535	0.758824	0.840099
1700056E22Rik	1;1	184033030;184033032	184034301;184033998	-;-	1272	0.379751	0.172668	0.102582	0	0.204988	0.0946605	0.112165	0.151786	0.204952	0.0769742	0.159208	0	0.0472479
1700056N10Rik	16;16	17047520;17048243	17047693;17049111	+;+	1043	4.9621	3.68514	3.87823	3.47642	3.39993	4.27143	4.78771	5.15229	4.24917	4.03661	4.19879	4.37638	3.4573
1700057G04Rik	9;9;9;9;9;9;9;9;9;9;9;9;9;9;9;9;9;9;9;9;9;9;9;9;9;9;9;9	92309377;92309377;92309377;92309408;92326382;92326382;92326575;92343451;92343451;92343451;92343505;92346134;92347802;92347802;92350926;92350926;92350926;92351085;92352535;92352535;92352535;92353467;92354545;92354545;92354545;92357702;92357702;92357702	92309432;92309432;92309432;92309432;92326490;92326490;92327114;92343683;92343683;92343683;92343683;92346267;92347844;92347844;92351071;92351146;92351146;92351146;92352696;92352696;92352696;92353605;92354706;92354706;92354706;92357876;92357819;92357876	+;+;+;+;+;+;+;+;+;+;+;+;+;+;+;+;+;+;+;+;+;+;+;+;+;+;+;+	1974	0.0699152	0.0278159	0	0	0.0528357	0	0.0361383	0.13041	0.220111	0.198402	0.051295	0.0304256	0.0608909
1700057H15Rik	4;4;4;4;4;4;4;4;4;4;4;4;4	124414416;124414416;124418690;124418690;124449902;124450235;124450632;124450632;124450632;124451232;124451232;124483035;124485927	124414730;124414730;124418857;124418858;124450455;124450452;124450679;124450679;124450679;124451295;124451285;124483103;124485959	-;-;-;-;-;-;-;-;-;-;-;-;-	1252	0	0	0	0	0	0	0	0	0	0	0	0	0
1700057H21Rik	2;2;2;2;2	51420984;51421050;51436123;51437694;51438661	51421241;51421241;51436229;51437900;51438785	-;-;-;-;-	697	0	0	0	0	0.074819	0.086376	0	0	0	0	0	0	0
1700058P15Rik	7;7	19258492;19259474	19258638;19259739	+;+	413	9.1897	7.31228	6.63476	14.0739	16.7937	12.3907	8.98189	24.3093	47.7633	36.9834	20.1042	40.7187	29.9769
1700060C16Rik	6;6;6;6;6	143593353;143613874;143615475;143634872;143651223	143593532;143613942;143615709;143634966;143651288	-;-;-;-;-	645	0	0	0	0	0	0	0	0.0997789	0	0	0	0	0
1700060C20Rik	2;2;2	158192008;158194111;158195355	158192059;158194268;158195749	+;+;+	605	0	0	0	0	0	0	0	0	0.287272	0.161837	0.167366	0	0
1700060J05Rik	4;4	53562983;53564512	53563856;53564697	-;-	1060	5.59862	5.33545	5.10856	5.0135	3.00102	5.16846	4.71093	5.64645	7.87016	7.66663	6.01807	7.47918	4.87599
1700060O08Rik	12;12	54062048;54079312	54062247;54079392	-;-	281	0	0	0	0.197001	0	0	0	0.22903	0.309252	0	0	0	0
1700061E17Rik	9;9	110986201;110987093	110986555;110987804	+;+	1067	2.18789	2.22979	2.27766	1.60832	2.68809	2.45443	2.64087	0.56275	0.162886	0.0917631	0.78291	0.778473	0.81672
1700061E18Rik	13;13	41800783;41801469	41801043;41801795	+;+	588	0	0	0	0.18829	0	0.102388	0.121321	0.109451	0	0.166516	0.344409	0.408572	0.20442
1700061F12Rik	2;2;2;2	9189515;9190299;9193431;9197123	9189647;9190407;9193709;9197477	+;+;+;+	876	0	0	0	0	0	0	0	0	0	0	0	0	0
1700061G19Rik	17;17;17;17;17;17;17;17;17;17;17;17;17;17;17;17;17	56875477;56875503;56876088;56876088;56877363;56877363;56880451;56880946;56882167;56882541;56882780;56883316;56883627;56884751;56885084;56886441;56888637	56875680;56875680;56876396;56876396;56877818;56877589;56880539;56881066;56882247;56882690;56882986;56883497;56883860;56884968;56885223;56886687;56888904	+;+;+;+;+;+;+;+;+;+;+;+;+;+;+;+;+	2906	0.474923	0.472372	0.269409	0.419085	0.287124	0.745818	0.564607	0.354342	0.358843	0.60647	0.331017	0.310014	0.413623
1700061H18Rik	18;18;18;18	69943320;69946938;69969480;69969480	69943823;69947384;69969596;69969609	-;-;-;-	1081	6.12822	6.65404	5.85426	4.3528	3.66634	3.56435	6.40119	3.33396	1.12544	1.44919	3.37209	2.77799	3.72494
1700061I17Rik	3;3;3;3;3;3;3;3;3	117060522;117061104;117061480;117062451;117066819;117067719;117068972;117076998;117077393	117060871;117061345;117061682;117062487;117067150;117067825;117069059;117077227;117077765	-;-;-;-;-;-;-;-;-	1962	0	0	0	0	0	0	0	0	0	0	0	0.0306117	0
1700061J23Rik	11;11;11	23152140;23165171;23166078	23152237;23165311;23166375	+;+;+	537	0	0	0	0	0	0	0	0	0	0	0	0	0
1700063A18Rik	1;1;1	95990659;95995414;96021727	95990903;95995492;96021758	-;-;-	356	0	0	0	0	0	0	0	0	0	0	0	0	0
1700063D05Rik	9;9;9;9;9;9;9;9;9;9;9;9;9;9;9;9;9;9;9;9;9;9	41192446;41196096;41206137;41210706;41210838;41210838;41210838;41216735;41216735;41216735;41216735;41216948;41217285;41217285;41217285;41217285;41217285;41217460;41217460;41217460;41217460;41217460	41192555;41196188;41206329;41211034;41211034;41211034;41211034;41216813;41216813;41216813;41216813;41217051;41217374;41217374;41217374;41217374;41217374;41217566;41217627;41217564;41217990;41217990	+;+;+;+;+;+;+;+;+;+;+;+;+;+;+;+;+;+;+;+;+;+	1529	0	0	0	0	0	0	0	0	0	0	0.0662239	0	0
1700063H04Rik	6;6	122391379;122392024	122391531;122392687	+;+	817	0	0.0672075	0	0.0677569	0	0	0	0	0	0	0	0	0
1700063H06Rik	9;9	82260293;82263182	82260433;82263485	+;+	445	0	0	0	0	0	0	0	0	0	0	0	0	0
1700063I16Rik	1	168675272	168675882	-	611	0	0	0	0	0	0	0.116754	0.105331	0	0	0.0828612	0.098298	0
1700063K16Rik	16;16;16;16;16;16;16	76819585;76821373;76821402;76827837;76834383;76835066;76841718	76820027;76821741;76821519;76827960;76834531;76835116;76841784	-;-;-;-;-;-;-	1203	0	0	0	0	0	0.0250225	0	0	0	0	0	0	0
1700063O14Rik	5;5;5	91766242;91766972;91767277	91766552;91767128;91767300	-;-;-	492	0	0	0	0	0	0	0	0	0	0	0	0	0.122153
1700064H15Rik	3;3	19610368;19628488	19610571;19628677	-;-	394	7.00571	1.67234	2.64942	2.95052	5.95609	0.916814	1.62952	5.55368	10.8073	4.72161	7.45288	10.2133	4.11848
1700064J06Rik	10;10;10;10	119092905;119093762;119095598;119102881	119092933;119093802;119095686;119103107	+;+;+;+	386	0	0	0	0	0	0	0	0.166729	0	0	0.131161	0	0
1700064M15Rik	12;12	99626053;99627606	99626328;99627974	-;-	645	0	0.0851296	0	0	0	0	0	0	0	0	0	0	0
1700065D16Rik	9;9;9;9;9;9;9;9;9	95855418;95855420;95855420;95855421;95855552;95856472;95856472;95857366;95857507	95855560;95855560;95858322;95855560;95858320;95857871;95856569;95857517;95857871	-;-;-;-;-;-;-;-;-	2905	0.688875	0.548141	0.426711	0.533565	0.50264	0.476659	0.392906	0.288002	0.239311	0.404453	0.470554	0.434169	0.444797
1700065I16Rik	15;15;15;15;15;15;15;15;15;15;15	63817188;63817202;63817455;63818210;63818210;63818210;63819006;63819006;63819006;63820026;63821346	63817278;63817278;63817484;63818396;63818396;63818396;63819420;63819540;63819176;63820131;63821393	+;+;+;+;+;+;+;+;+;+;+	997	0	0	0	0	0	0	0	0.0322755	0	0	0	0	0
1700065J11Rik	6;6;6	35330846;35334851;35336614	35330882;35335025;35336825	+;+;+	424	0	0	0	0	0	0	0	0	0	0	0	0	0
1700065J18Rik	1;1;1;1;1	192841661;192841671;192842347;192842452;192842452	192841737;192841729;192842373;192842740;192842734	+;+;+;+;+	393	0.526765	0	0	0.140858	0	0.306382	0.544557	0	0	0	0	0	0
1700065L07Rik	6;6;6;6;6	73436986;73437517;73440183;73461480;73470956	73437208;73437612;73440248;73461642;73471021	-;-;-;-;-	614	0	0	0	0	0	0	0	0	0	0	0	0	0
1700065O20Rik	18;18;18;18;18	49803326;49805781;49807177;49808332;49817817	49803527;49805878;49807356;49808419;49817958	-;-;-;-;-	710	0	0	0	0	0	0.0847945	0	0	0	0	0	0	0
1700066B17Rik	1;1;1;1;1;1;1;1;1;1;1;1	39839175;39840641;39842423;39842428;39844018;39845228;39845228;39845228;39845665;39845665;39847309;39847309	39839604;39840738;39842556;39842556;39844103;39845339;39845339;39845339;39845846;39845699;39847330;39847334	-;-;-;-;-;-;-;-;-;-;-;-	1068	0	0	0	0	0	0.0563709	0	0.542338	0.569568	0.458386	0.189619	0.112472	0.112546
1700066B19Rik	18;18;18;18;18	35703225;35715460;35726989;35728474;35728474	35703422;35715594;35727096;35730869;35729770	+;+;+;+;+	2837	3.33234	4.1225	3.93245	4.11717	4.1175	3.28926	5.05418	2.20045	2.63425	3.69281	5.24663	4.53044	3.89788
1700066C05Rik	16;16;16	79999376;80000065;80000364	79999411;80000252;80000546	+;+;+	407	0	0	0	0	0	0	0	0	0	0	0	0	0
1700066J03Rik	13;13	58148777;58149377	58148904;58149692	+;+	444	0	0	0	0.124679	0	0	0	0	0	0	0	0	0
1700066M21Rik	1;1;1;1;1;1;1	57377620;57377633;57377640;57379707;57380042;57380042;57382743	57377946;57377946;57377946;57379812;57380162;57380078;57385423	+;+;+;+;+;+;+	3235	1.83448	1.85009	2.03692	2.17323	1.08005	2.32628	2.40362	0.656505	0.644697	0.817188	1.47111	1.26247	2.13645
1700066N21Rik	5;5;5;5;5	87908579;87912261;87914069;87954988;87979046	87908793;87912332;87914132;87955113;87979351	-;-;-;-;-	783	0	0	0	0	0	0	0	0	0	0	0	0	0
1700066O22Rik	18;18;18;18;18;18;18;18;18;18;18;18;18;18;18	57504422;57505975;57515690;57515701;57530433;57532816;57532816;57533426;57533426;57533426;57533426;57533426;57533650;57533650;57533650	57505055;57506159;57515940;57515940;57531040;57532956;57532956;57533495;57533495;57533716;57533752;57533495;57533723;57533739;57533728	-;-;-;-;-;-;-;-;-;-;-;-;-;-;-	2146	0.0803894	0.0511729	0.0608032	0.0257956	0	0	0.0332418	0.0299895	0	0	0	0	0
1700067G17Rik	1;1;1	89016113;89016546;89021972	89016372;89016649;89022210	+;+;+	603	0.114438	0	0	0.0918032	0	0	0.118303	0	0.144112	0.162374	0	0	0
1700067K01Rik	8;8;8;8;8;8;8;8;8;8;8;8;8;8;8;8;8;8;8;8	84001502;84001704;84001704;84002329;84002858;84002861;84002861;84003116;84003116;84003116;84003116;84003296;84003296;84003296;84003925;84003925;84003925;84004451;84004451;84004451	84001905;84001905;84001905;84003002;84003002;84003002;84003002;84003289;84003216;84003216;84003216;84003481;84003481;84003481;84004059;84004123;84004059;84004670;84004664;84004770	+;+;+;+;+;+;+;+;+;+;+;+;+;+;+;+;+;+;+;+	1957	0.599441	0.729495	0.366715	0.53745	1.14584	0.830613	0.656139	0.0657715	0	0.0500313	0.465665	0.859317	0.798459
1700067P10Rik	17;17;17	48089632;48090024;48090235	48089691;48090071;48090920	+;+;+	794	0	0	0	0	0	0	0	0	0	0	0	0	0
1700069B07Rik	7;7	121707075;121707189	121708013;121708011	+;+	939	0.661402	0.935609	0.903242	0.825349	1.38842	0.448806	0.911654	0.411229	0.37018	1.04272	0.75484	1.15131	0.960054
1700069L16Rik	5;5;5;5;5;5;5;5;5	113692422;113700274;113703697;113703898;113704354;113723700;113723700;113724631;113724631	113692819;113700740;113703948;113703948;113704448;113723865;113723865;113724749;113724772	-;-;-;-;-;-;-;-;-	1520	0	0	0	0	0	0	0	0	0	0	0	0	0
1700069P05Rik	6;6;6	118246695;118247211;118247906	118246822;118247320;118248452	-;-;-	785	0	0	0	0	0	0	0	0	0	0	0	0	0
1700071G01Rik	5;5	73157014;73157697	73157192;73157884	+;+	367	1.88028	0.897688	1.95548	1.81005	1.13676	1.47639	0.971893	0.876804	0.236784	1.60073	1.65542	1.80017	3.11141
1700071K01Rik	11	81572655	81573473	-	819	0	0	0	0	0	0	0	0	0	0	0.0618171	0	0
1700071M16Rik	17;17;17;17;17;17;17;17;17;17;17;17	43588340;43588533;43589397;43589397;43589773;43589773;43591160;43591160;43591422;43591845;43592182;43592318	43588953;43588953;43589549;43589549;43591509;43589877;43591453;43591453;43591509;43591962;43592432;43592442	-;-;-;-;-;-;-;-;-;-;-;-	2883	0.622325	1.00942	1.31253	17.5884	13.6839	4.51061	2.12798	34.9356	47.6698	39.0049	18.7287	31.2487	34.2293
1700072B07Rik	9;9;9	58370504;58373671;58373937	58370640;58373731;58374183	+;+;+	445	0	0	0	0.124399	0	0	0	0	0	0	0	0	0
1700072G22Rik	1;1	51457932;51458777	51458324;51458931	-;-	548	0	0.100198	0	0	0.285487	0.109861	0	0	0.317152	0.17867	0.184774	0.109599	0
1700072O05Rik	6;6	120554796;120562724	120554960;120562879	+;+	321	0	0	0	0	0	0	0	0	0	0	0	0	0
1700073E17Rik	6;6;6;6;6;6;6	145387596;145387597;145390308;145391425;145391425;145391426;145402100	145387897;145387897;145390374;145392240;145392049;145392166;145402179	+;+;+;+;+;+;+	1265	0.381853	0.824714	0.154724	0.0437607	0.164898	0.237961	0.281964	0.0508754	0.343477	0.232201	0.160089	0.0474783	0
1700074A21Rik	1	37299352	37299697	-	346	0	0	0	0	0	0	0	0	0	0	0	0	0
1700074H08Rik	13;13;13	119680040;119680716;119681318	119680279;119680759;119681588	+;+;+	555	1.11902	2.17656	1.29308	0.398972	0.281886	0.542379	0.51414	0	0.156576	0	0.45611	0.541082	0.541436
1700074P13Rik	6;6;6;6;6;6;6;6;6;6;6;6;6;6;6;6;6	40920437;40920460;40921707;40921707;40921784;40925977;40925977;40925977;40928512;40928512;40928512;40929441;40929441;40929441;40939183;40940353;40940353	40921141;40921141;40921852;40921852;40921852;40926227;40926227;40926227;40928680;40928680;40928680;40929566;40929740;40929566;40939250;40940557;40940497	-;-;-;-;-;-;-;-;-;-;-;-;-;-;-;-;-	1844	0	0	0	0	0	0	0	0	0	0	0	0	0
1700080E11Rik	9;9;9;9;9	105143342;105144312;105144435;105144788;105144788	105143649;105144704;105144704;105145092;105145076	-;-;-;-;-	1006	0	0	0	0	0	0	0	0	0	0	0	0	0
1700080G11Rik	4;4	127531622;127532480	127531651;127532885	+;+	436	0	0	0	0	0	0	0	0.147609	0.199311	0	0	0	0
1700080N15Rik	2;2;2;2;2;2;2;2;2	4132063;4132065;4135479;4135706;4135706;4138180;4140933;4140933;4140933	4132189;4132209;4135785;4135785;4135785;4138981;4141141;4141139;4141141	-;-;-;-;-;-;-;-;-	1465	0	0.0374802	0	0	0	0	0.0973883	0.04393	0	0	0.0345585	0	0
1700080O16Rik	X;X;X;X;X;X;X;X	51968695;51968892;51970215;51970215;51970483;51970910;51970982;51972731	51969869;51969869;51970285;51970285;51970599;51971075;51971047;51972772	-;-;-;-;-;-;-;-	1571	0	0	0	0	0	0	0	0.286761	0	0.124648	0.418947	0.496996	0.076511
1700081H04Rik	5;5;5;5	119108234;119113646;119113870;119114220	119108715;119113757;119114079;119114543	+;+;+;+	1128	0	0	0	0	0	0	0	0	0.154078	0	0	0	0
1700082M22Rik	8;8;8;8;8;8	104641807;104652617;104657281;104657281;104658289;104658289	104641883;104654317;104657442;104657442;104658558;104658447	+;+;+;+;+;+	2210	0.156123	0.0745365	0.0295212	0.0250486	0.0471935	0.136208	0.0645583	0.029121	0	0	0.0458173	0.054353	0.108777
1700083H02Rik	12;12	71383154;71384051	71383632;71384208	-;-	637	0	0	0	0	0	0	0	0	0	0	0.0794791	0	0
1700084C06Rik	9;9	21091755;21127840	21091950;21128393	+;+	750	9.43086	9.22464	10.0038	12.7691	15.297	11.7197	9.36892	13.1289	11.8184	10.705	12.1508	14.975	12.1401
1700084E18Rik	2;2;2	30236795;30237493;30237780	30238223;30237777;30238223	-;-;-	1429	2.87325	3.53505	3.19589	2.32431	2.44505	2.56994	2.09668	4.7964	2.18922	2.60366	7.42239	5.86311	1.72433
1700084F23Rik	13;13;13;13;13;13;13;13;13;13;13;13;13;13;13;13;13;13;13;13;13;13;13;13	70004050;70004485;70012201;70012825;70013176;70018897;70020770;70020770;70020770;70020770;70020972;70020972;70020972;70020972;70022116;70026762;70026762;70026762;70026762;70027350;70027954;70028136;70028136;70028234	70004591;70004591;70012338;70013021;70013298;70019078;70020894;70020894;70020894;70020894;70021049;70021049;70021049;70021049;70022340;70026847;70026847;70026847;70026847;70027363;70028135;70028319;70028348;70028323	-;-;-;-;-;-;-;-;-;-;-;-;-;-;-;-;-;-;-;-;-;-;-;-	2105	0	0	0	0	0	0	0	0	0	0	0	0	0
1700084J12Rik	15;15	33403985;33405206	33405976;33405939	-;-	1992	0.935326	1.18528	0.687791	1.19496	1.02099	1.02758	1.18179	0.452311	0.261746	0.294913	0.508315	0.663314	0.995622
1700084M14Rik	X;X	91575210;91575708	91575564;91575911	-;-	559	0	0	0	0	0	0	0	0	0	0	0	0	0
1700085C21Rik	12;12;12	82932520;82937520;82939005	82933394;82937575;82939155	-;-;-	1082	0.255106	0.811957	0.72357	0.204648	0.192787	0.778981	1.25268	0.2974	0.40157	0.090491	0.187165	0.111017	0.111089
1700086D15Rik	11;11;11;11;11;11;11;11	65151910;65151910;65152927;65152927;65153203;65153203;65159868;65159869	65152644;65152644;65153069;65153069;65153393;65153393;65159890;65159891	-;-;-;-;-;-;-;-	1093	6.94482	6.07862	5.0737	2.83624	2.33787	3.91079	4.63396	2.29638	2.94171	3.04573	3.52035	2.74749	3.79401
1700086L19Rik	12;12;12;12;12;12;12;12;12;12;12;12	74284242;74284281;74284289;74285515;74285515;74288708;74295323;74295323;74295323;74295553;74295553;74295553	74284456;74284456;74284456;74285638;74285638;74288934;74295438;74295438;74295438;74295945;74295927;74295931	+;+;+;+;+;+;+;+;+;+;+;+	1075	0.0641919	0.306466	0	0	0	0	0.13272	0	0	0.0910802	0.047096	0.0558699	0
1700086O06Rik	18;18;18;18;18;18	38238405;38238405;38239573;38240839;38249714;38250178	38239189;38239189;38239751;38240953;38250198;38250565	-;-;-;-;-;-	1931	1.57239	2.24639	1.62176	0.860031	1.3233	1.34064	1.73632	0.666571	0.945052	0.608459	1.44202	1.30633	0.933703
1700086P04Rik	4;4	129050097;129057788	129050909;129057983	-;-	1009	0.341954	0.163256	0.3233	0.219454	0.103367	0.238668	0.141401	0.0637833	0.0861246	0	0.15053	0	0.119127
1700087M22Rik	14;14	30770681;30777829	30770712;30778004	-;-	208	12.2752	15.179	12.8602	13.8393	11.0315	10.1305	10.9749	11.1388	5.43123	6.59018	11.6834	7.79626	10.9797
1700088E04Rik	15;15;15;15;15;15;15;15;15;15;15;15;15;15;15;15;15;15;15;15;15;15;15;15;15;15;15;15;15;15;15;15;15;15;15;15;15;15;15;15;15;15;15;15;15;15;15;15;15;15;15;15;15;15;15;15;15;15;15;15;15;15;15;15;15;15;15;15;15;15;15	79129349;79130649;79130954;79131179;79131601;79132132;79132667;79133981;79134179;79134550;79134655;79134655;79134661;79134813;79134992;79135009;79135017;79135056;79135082;79135353;79135353;79135353;79135353;79135353;79135353;79135353;79135353;79135637;79135637;79135637;79135637;79135637;79135637;79135637;79135637;79136307;79136307;79136307;79136307;79136307;79137132;79137420;79137423;79137425;791…	79130537;79130764;79131074;79131373;79132039;79132570;79132742;79134033;79134389;79134631;79135222;79135222;79135222;79134916;79135222;79135222;79135222;79135222;79135222;79135453;79135453;79135453;79135453;79135453;79135453;79135453;79135453;79135765;79135765;79135765;79135765;79135765;79135765;79135765;79135765;79136489;79136713;79136489;79136489;79136489;79137312;79137723;79137683;79137720;791…	-;-;-;-;-;-;-;-;-;-;-;-;-;-;-;-;-;-;-;-;-;-;-;-;-;-;-;-;-;-;-;-;-;-;-;-;-;-;-;-;-;-;-;-;-;-;-;-;-;-;-;-;-;-;-;-;-;-;-;-;-;-;-;-;-;-;-;-;-;-;-	5292	10.347	12.0203	10.1894	8.74504	7.62722	10.5004	10.0427	6.76166	7.66038	9.69491	13.1737	10.6002	11.0159
1700091H14Rik	14;14;14;14;14;14;14;14;14	42089750;42091673;42091676;42092513;42092513;42093945;42093945;42095095;42095095	42090518;42091816;42091816;42092644;42092644;42094107;42094107;42095277;42095245	-;-;-;-;-;-;-;-;-	1391	0	0	0	0	0	0	0	0	0	0	0	0	0
1700092C02Rik	8;8;8	77624172;77627606;77628830	77624285;77627722;77628957	+;+;+	359	0	0	0	0	0	0	0	0	0	0	0	0	0
1700092C10Rik	14;14;14	69164797;69165764;69171576	69165017;69165845;69171857	-;-;-	585	0	0	0	0	0	0	0	0.110013	0	0	0	0	0
1700092C17Rik	2;2;2	22755984;22761910;22761972	22756043;22762273;22762241	+;+;+	424	0	0	0	0.26112	0.368978	0.283982	0	0	0.204952	0	0.238812	0.424953	0.425231
1700092E19Rik	13;13;13;13;13;13	26284151;26286088;26305750;26306447;26312121;26312121	26284263;26286337;26305987;26306564;26312406;26312347	-;-;-;-;-;-	1005	0	0	0	0	0	0	0	0	0	0	0	0	0
1700092K14Rik	11;11;11	114198258;114198726;114199023	114198323;114198877;114199199	+;+;+	395	0	0	0	0	0.132022	0	0	0	0	0	0	0	0
1700092M07Rik	19;19;19	8740718;8740762;8740975	8740846;8741224;8741225	+;+;+	508	0.791942	1.00846	0.385287	0.98074	0.615932	1.00735	0.491495	0.506751	0.769781	1.2528	0.348816	0.768485	0.532376
1700093J21Rik	16;16	96082676;96088466	96082718;96089070	+;+	648	0.106491	0.508413	0.100682	0.512568	0.24143	0.74326	0.220176	1.39044	1.87746	0.906585	0.468779	0.278056	0.46373
1700093K21Rik	11;11;11;11;11;11;11;11;11;11;11;11;11;11;11	23516203;23516203;23517212;23517212;23518041;23518041;23518781;23518781;23518788;23518817;23519069;23519498;23519498;23519498;23520624	23516610;23516610;23517380;23517380;23518142;23518142;23518976;23518976;23518976;23518976;23519223;23519617;23519942;23519942;23521155	-;-;-;-;-;-;-;-;-;-;-;-;-;-;-	2007	0.137531	0.0273585	0.0325072	0.0827464	0	0.149985	0.106632	0.320665	0.389685	0.536634	0.428838	0.0598506	0
1700094J05Rik	10;10;10;10;10;10	76389015;76389386;76398401;76398593;76400786;76401368	76389106;76389560;76398945;76398960;76400830;76401507	+;+;+;+;+;+	1012	11.7965	9.76635	13.1515	10.612	7.60075	11.1842	12.6884	8.52163	3.69238	6.77252	8.92997	7.35914	7.36395
1700094M24Rik	6;6;6	52492451;52493658;52499605	52492479;52493811;52500086	+;+;+	665	0	0	0	0	0	0	0	0	0	0	0	0	0
1700095A13Rik	18;18	83106528;83107585	83106962;83107860	-;-	711	0	0	0	0	0	0	0	0	0	0	0	0.0844727	0
1700095A21Rik	4;4;4	146519039;146546117;146546779	146519927;146546201;146546873	-;-;-	1069	0	0	0	0.103568	0	0	0	0	0.0812907	0	0	0	0
1700095B10Rik	5;5;5;5;5;5;5;5;5;5;5;5;5	112793292;112793300;112793309;112793332;112795415;112795415;112795415;112795415;112795599;112798829;112798829;112801295;112801295	112793611;112793611;112793611;112793611;112795501;112795501;112795691;112795598;112795942;112798964;112798964;112801649;112801701	+;+;+;+;+;+;+;+;+;+;+;+;+	1391	0.0496091	0	0	0.0397968	0	0.0865623	0	0	0.312364	0.351945	0.036397	0	0.0432059
1700095J03Rik	7;7	109438618;109444651	109440182;109444893	+;+	1808	1.79386	3.55326	0.793872	0.734832	0.288434	1.36525	0.591844	0.284767	0.769024	0.704008	0.980081	0.930134	0.0664816
1700095J07Rik	6;6;6;6	30304605;30304621;30307665;30330860	30305089;30305089;30307768;30331779	+;+;+;+	1509	0	0	0	0	0	0	0	0	0.0575876	0	0	0	0.0398273
1700095J12Rik	4;4	138137595;138137896	138137708;138138518	-;-	737	2.24715	2.30959	1.85899	1.65246	1.55668	3.75765	1.64549	1.22253	2.00447	1.19566	2.61041	3.91165	2.69102
1700095K22Rik	7;7	3981150;3982670	3981223;3982877	+;+	282	0	0	0.231354	0.196303	0.36985	0.426979	0	0	0	0	0.179533	0	0
1700096J18Rik	11;11	109346839;109353384	109347052;109353651	+;+	482	0.715833	0.455673	0.676783	0.229699	0.216385	0.374714	0.148002	0.400565	0.90145	0.203135	0.420151	0.249212	0.249375
1700096K18Rik	5	25530013	25531466	+	1454	0.474596	0.528693	0.71793	0.380725	0.502121	0.828117	0.932188	0.796721	0.29883	0.808071	0.905318	0.826136	0.454672
1700097M23Rik	6	81893818	81895339	-	1522	0	0	0	0	0	0	0	0	0.0570958	0.128661	0	0	0
1700097N02Rik	17;17;17;17	30622441;30624200;30624881;30626782	30622694;30624613;30624933;30626905	-;-;-;-	845	0.218043	0.173498	0.12894	0.633498	0.493717	0.28499	0.478675	0	0	0	0.179745	0.272225	0.379088
1700099I09Rik	13;13;13;13;13	102760255;102760270;102760982;102761262;102761329	102760296;102760296;102761189;102761896;102761862	+;+;+;+;+	885	6.54975	6.45253	6.15559	4.8164	3.77122	7.07483	5.40065	7.89014	14.4342	14.2165	6.54047	4.54692	4.14244
1700100L14Rik	13;13;13;13;13;13;13	70573241;70573280;70574513;70574790;70574790;70575719;70575719	70573372;70573372;70574630;70574953;70574953;70576110;70576105	+;+;+;+;+;+;+	806	0.256847	0.204374	0	0.137363	0.129402	0.0746949	0.265522	0.479087	0.754712	0.850346	0.188442	0	0.29826
1700101I11Rik	6;6;6	129531950;129532094;129533238	129533817;129532942;129533284	-;-;-	1868	13.0403	13.0805	12.9226	8.38658	6.50465	9.08863	10.8457	9.78453	4.97766	4.50769	10.4888	8.39169	6.24158
1700101I19Rik	1;1	34579202;34579224	34579711;34579613	-;-	510	0	0	0	0	0	0	0	0	0	0	0	0	0
1700101O22Rik	12;12;12	7372039;7375852;7380265	7372203;7375959;7380330	-;-;-	339	0	0	0	0	0	0	0	0	0	0	0	0	0
1700102F20Rik	6	140309071	140309740	+	670	0	0	0	0	0	0	0	0	0	0	0	0	0
1700102P08Rik	9;9;9;9;9;9;9;9	108392805;108392834;108393235;108393235;108395294;108395294;108397193;108410829	108392859;108392859;108393639;108393639;108395385;108395385;108397770;108410934	+;+;+;+;+;+;+;+	1236	1.39576	1.59928	1.3724	0.985325	1.81424	1.70481	1.32747	0.57276	0.351536	0.950594	1.02403	1.06903	2.04221
1700104B16Rik	8;8;8;8	33730534;33730534;33731642;33731789	33731077;33731077;33731819;33731814	-;-;-;-	722	0	0.380253	0	0	0	0.16677	0	0	0	0	0	0	0.24972
1700105P06Rik	19	7382537	7384308	+	1772	3.19329	2.50993	2.24591	2.6554	3.06066	2.58212	2.17392	2.61497	4.3646	6.13327	3.51426	3.28771	2.74721
1700108F19Rik	14;14;14;14;14;14;14;14;14;14;14;14;14;14;14;14;14;14;14;14;14;14;14;14;14;14	76672963;76677566;76677579;76677579;76677607;76677610;76677654;76678229;76678238;76678238;76678238;76679455;76679455;76679455;76679455;76679455;76680126;76680126;76680126;76680126;76681754;76686728;76686834;76686834;76686834;76686834	76673014;76678379;76679830;76677679;76677679;76677679;76677755;76678379;76678379;76678379;76678379;76679598;76679598;76679598;76679598;76679598;76680388;76680320;76680388;76680320;76681909;76687169;76686887;76687095;76687108;76687092	+;+;+;+;+;+;+;+;+;+;+;+;+;+;+;+;+;+;+;+;+;+;+;+;+;+	3178	0.0217137	0.0172777	0.0615877	0.0348379	0	0.037888	0	0.0607527	0	0	0.0318617	0.0188987	0
1700108J01Rik	14;14	122229905;122233456	122230189;122233654	-;-	484	0.28515	0.226895	0.134797	0.457499	0.107746	0.746332	0.736952	0.531879	0.179545	0.404592	0.523018	0.620455	0.496689
1700108N11Rik	2;2	144331459;144332032	144331767;144332639	+;+	917	0.564391	0.658663	0.213441	0.301839	0.341214	0.525227	0.233381	0.210548	0	0.213547	0.276053	0	0.327696
1700109G14Rik	14;14;14;14;14;14	61292980;61294629;61294670;61304825;61305141;61317756	61293182;61295032;61295032;61305308;61305334;61318146	-;-;-;-;-;-	1508	0	0.0364115	0.0432638	0.110127	0.0345815	0.119769	0.0473057	0	0.0576258	0	0.134292	0.238966	0
1700109G15Rik	11;11;11	84716976;84719911;84720386	84717159;84720063;84720432	-;-;-	384	0	0	0	0	0	0	0	0	0	0	0	0	0
1700109H08Rik	5;5;5;5;5;5;5;5;5;5;5;5;5;5;5;5;5;5;5	3571566;3571673;3575623;3575623;3575688;3577240;3577240;3577240;3578223;3580405;3580453;3580498;3582143;3582143;3582177;3584240;3584240;3584240;3584240	3571810;3571810;3575778;3575778;3575778;3577344;3577344;3577344;3580449;3580556;3580556;3580556;3582247;3582247;3582247;3584344;3584356;3584356;3584341	+;+;+;+;+;+;+;+;+;+;+;+;+;+;+;+;+;+;+	3062	3.7861	4.16028	3.6861	3.36266	2.81863	4.48287	4.25948	9.39509	11.4939	12.4228	5.37366	5.02135	4.37693
1700109I08Rik	14;14;14;14	39655663;39661349;39683740;39685225	39655842;39661442;39683792;39685293	+;+;+;+	396	0	0	0	0	0	0	0	0	0	0	0	0	0
1700109K24Rik	15;15;15	77084443;77090555;77095853	77084862;77090717;77096314	+;+;+	1045	5.48088	5.30695	3.30892	3.49625	2.79458	5.01221	4.43722	3.32564	4.07472	4.40366	4.45722	2.87369	4.37086
1700110C19Rik	17;17;17;17;17;17	10324602;10324602;10325055;10325055;10328920;10328920	10324790;10324753;10325194;10325194;10329307;10329307	+;+;+;+;+;+	717	2.11735	2.60375	1.72886	0.540448	1.52737	2.60297	2.88531	0.448796	0.363597	0.273114	0.564889	1.08896	0.922026
1700110I01Rik	14;14;14;14;14;14;14;14;14;14;14;14;14;14;14;14;14	3262340;3262368;3262461;3263231;3269901;3270669;3270669;3270681;3270860;3273660;3298551;3300099;3304664;3304664;3304664;3304664;3304667	3262566;3262566;3262566;3263719;3270075;3270862;3270862;3270862;3270932;3273762;3299646;3300272;3304837;3305064;3304865;3305832;3304703	+;+;+;+;+;+;+;+;+;+;+;+;+;+;+;+;+	3697	0	0.0148522	0	0	0	0	0	0.017408	0.0235055	0.0529679	0.0136944	0.0162456	0
1700110I07Rik	7	41048659	41048847	-	189	0	0	0	0	0	0	0	0	0	0	0	0.635557	0
1700110K17Rik	9;9;9;9;9;9	40323426;40333474;40342038;40342038;40343204;40343381	40323520;40333587;40342495;40342495;40343558;40343564	+;+;+;+;+;+	1028	2.48369	2.51041	2.66552	2.63863	2.63788	3.68955	1.80424	2.00334	5.4101	3.4288	3.69369	3.21333	4.76469
1700111E14Rik	6;6;6;6;6	36937048;36938657;36974713;36983823;36985503	36937232;36938806;36974908;36983917;36985784	+;+;+;+;+	908	0	0.060472	0	0	0	0.132608	0	0	0	0	0	0	0
1700111N16Rik	X;X;X;X;X;X;X;X;X	69929259;69949056;69967407;69979588;69980115;69988998;70098243;70131873;70143510	69929689;69949100;69967567;69979663;69980205;69989097;70098309;70131955;70143588	-;-;-;-;-;-;-;-;-	1133	0.0609058	0.048463	0	0	0	0.159411	0	0.113605	0.230096	0.0864177	0.134055	0.0530098	0.106089
1700112D23Rik	3;3;3;3;3	28702667;28738789;28742116;28742116;28780971	28702952;28738962;28742237;28742240;28781108	-;-;-;-;-	723	0.572666	0.493645	0.360951	0.306265	0.0721284	0.749429	0.197336	0.0890144	0.240387	0	0	0.0830707	0.083125
1700112E06Rik	14;14;14;14;14;14;14;14;14;14;14;14;14;14;14;14;14;14;14;14;14;14;14;14;14;14;14;14;14;14;14;14	22019712;22019821;22019848;22019848;22027227;22027227;22027227;22027227;22310165;22408853;22577727;22577848;22577848;22577848;22577848;22584406;22584406;22584406;22584406;22584406;22596425;22596425;22596425;22596425;22596425;22598134;22684829;22716197;22828689;22828689;23055955;23055955	22019908;22019908;22019908;22019908;22027327;22027327;22027327;22027327;22310254;22409034;22577974;22577974;22577974;22577974;22577974;22584545;22584439;22584545;22584545;22584545;22596542;22596542;22596542;22596542;22596542;22599268;22684892;22716410;22828775;22828782;23056085;23056085	+;+;+;+;+;+;+;+;+;+;+;+;+;+;+;+;+;+;+;+;+;+;+;+;+;+;+;+;+;+;+;+	2714	4.42413	4.47118	3.30536	9.3826	9.1078	6.16682	4.88897	4.22093	3.16989	4.97854	6.49175	9.25023	11.7143
1700112H15Rik	1;1;1;1;1;1	184527841;184528837;184530085;184531704;184554369;184557613	184528070;184529068;184530165;184531814;184554413;184557691	-;-;-;-;-;-	778	0	0	0.0838584	0.0711534	0	0	0	0	0	0.12585	0.0650748	0.154396	0.231746
1700112J05Rik	5;5;5;5	77006449;77007196;77017245;77018761	77006822;77007330;77017425;77018863	-;-;-;-	793	0.261058	0.90014	0.246817	0.349038	0.591853	0.683275	0.0899583	0.486941	0.219167	0.370408	0.446907	0.151476	0.151575
1700112J16Rik	7;7;7;7;7	67204082;67219498;67222010;67222244;67222496	67205398;67220180;67222329;67222458;67222536	-;-;-;-;-	2490	0.0831401	0.110258	0.104806	0.0444637	0	0.0241784	0.0572987	0.180924	0.069799	0.0393218	0.0813304	0.0964821	0.0241363
1700112K13Rik	4;4	127810638;127812072	127811236;127812173	-;-	701	0	0	0	0	0	0	0	0	0	0	0	0	0
1700113A16Rik	3;3;3;3;3;3;3;3;3;3	88171556;88171556;88172009;88172088;88175743;88175851;88175851;88177587;88177587;88177587	88171969;88172258;88172258;88172258;88175935;88175935;88175935;88177706;88177785;88177692	-;-;-;-;-;-;-;-;-;-	1095	4.60042	5.56607	6.25607	5.4599	4.04809	7.50489	6.09133	5.70107	6.74564	7.86867	5.96441	5.86889	5.70807
1700113B19Rik	1	138261642	138262061	+	420	0	0	0	0	0	0	0	0.153232	0	0.233122	0	0	0
1700113H08Rik	10;10;10;10;10;10;10;10;10;10;10;10;10	87058045;87058046;87073958;87073958;87121410;87121410;87165023;87165023;87205979;87225877;87230006;87230006;87230006	87058159;87058159;87074051;87074051;87121478;87121478;87165134;87165134;87206194;87226236;87230588;87230587;87230589	+;+;+;+;+;+;+;+;+;+;+;+;+	1550	0	0	0	0.0357144	0	0.0388414	0.0920476	0	0.0560643	0	0	0	0.0387738
1700116B05Rik	16;16;16;16	50783409;50783478;50783827;50783830	50783557;50783557;50784091;50784065	+;+;+;+	414	0	0	0	0	0	0	0	0	0	0	0	0	0
1700119H24Rik	16;16;16	34935854;34936748;34939168	34936260;34936766;34939329	-;-;-	588	2.93394	4.20219	3.10675	1.97705	2.57197	4.50507	2.66907	1.42287	1.47789	0.999094	1.72205	0.408572	1.83978
1700119I11Rik	13;13;13;13;13;13	91861432;91861485;91861624;91861709;91861928;91861928	91861506;91861501;91861767;91861836;91862044;91862038	+;+;+;+;+;+	405	0.340772	0.542307	0	0.136685	0.128763	2.22978	0.704562	0	1.07284	4.10985	0.125008	0.148297	0.148393
1700120B22Rik	10;10	63243068;63243887	63243264;63244153	-;-	464	13.2361	12.0704	11.9516	18.2536	22.7027	15.57	11.992	11.9283	14.9827	18.7804	17.2398	22.9109	20.7239
1700120C14Rik	15;15;15;15;15;15	99251788;99251836;99251838;99261625;99261625;99261952	99252001;99252001;99253265;99261784;99261708;99262044	+;+;+;+;+;+	1731	1.35541	2.12529	1.65837	1.69494	1.95822	1.66944	1.60724	2.56537	3.38864	2.88473	2.42758	1.80423	1.80541
1700120C18Rik	8;8	87500049;87501164	87500965;87501231	-;-	985	0	0	0	0	0	0.0611209	0	0	0	0	0.102798	0.182924	0.183044
1700120E14Rik	18;18;18;18;18	74525140;74525253;74529029;74531063;74531063	74525876;74525876;74529092;74531124;74531106	-;-;-;-;-	863	3.11848	2.79951	1.36078	1.79607	1.08769	2.30213	1.48791	1.34233	1.30903	1.92873	1.40797	1.2527	1.60172
1700120G07Rik	7;7;7;7;7;7;7	135191764;135192827;135192901;135193710;135193710;135195971;135195971	135192234;135193014;135193014;135193903;135193949;135196002;135196002	-;-;-;-;-;-;-	931	0.148241	0.117956	0.140154	0.17838	0.168041	0	0	0.553017	0.466701	0.94651	0.271902	0.129023	0
1700120G11Rik	4;4	14219496;14237243	14219778;14237450	-;-	491	0	0	0	0	0	0	0	0	0	0	0	0	0
1700120K04Rik	7	127603900	127604445	-	546	1.20066	1.05593	0.716943	1.5715	1.91021	2.09501	1.17588	1.06084	2.86483	3.76582	1.94724	1.87	2.31151
1700120O09Rik	14;14	67324894;67335566	67325507;67335928	-;-	977	0	0.112402	0	0	0	0.0616214	0	0	0	0	0	0.061474	0
1700121C08Rik	4;4;4;4	123833622;123856945;123858806;123859189	123833725;123857004;123858993;123859513	-;-;-;-	677	0	0.0811057	0	0	0	0	0	0.285188	0.51344	0.723126	0	0.0887151	0
1700121L03Rik	1;1	125190282;125197150	125190679;125197455	-;-	704	0	0	0	0	0	0	0	0	0	0	0	0	0
1700121L16Rik	X;X;X	104816776;104833043;104842058	104816842;104833138;104842455	+;+;+	561	0	0	0	0	0	0.107316	0	0	0	0	0	0	0
1700121N20Rik	12;12;12;12	106442653;106443667;106446483;106447325	106443051;106443871;106446563;106447666	-;-;-;-	1027	0	0	0	0	0	0	0	0	0	0	0	0	0
1700122D07Rik	1;1	59534811;59537047	59535048;59537229	-;-	421	0.409776	0.652121	0.619875	0.525961	0	0.500509	0.338893	0	0	0	0.240514	0	0.142754
1700122E12Rik	8;8;8;8	84847188;84847438;84848070;84848070	84847320;84847667;84848216;84848415	+;+;+;+	709	0.291987	0.15489	0	0	0.220658	0.254742	0.100616	0.0907721	0	0	0.249927	0.338844	0.508598
1700122O11Rik	17;17;17	48036745;48037415;48038214	48037281;48037568;48038293	-;-;-	771	0.179005	0.0712173	0.253859	0	0	0	0	0.250418	0.11271	0	0.0656656	0	0
1700123K08Rik	5;5;5;5;5;5;5;5;5;5;5;5;5	138561840;138562035;138562287;138562819;138563280;138563540;138563540;138564143;138564143;138564143;138564529;138564529;138564529	138562007;138563015;138562551;138563015;138563587;138563587;138563587;138564345;138564345;138564345;138564712;138564695;138564694	-;-;-;-;-;-;-;-;-;-;-;-;-	1844	0.0374221	0.0595538	0	0	0.0282803	0.130595	0	0	0	0	0	0	0
1700123L14Rik	6	96164497	96166243	-	1747	0.315999	0.345732	0.522831	0.22181	0.56716	0.551383	0.530841	0.147355	0.0497423	0.280227	0.11592	0.068758	0.103204
1700123M08Rik	4;4;4;4;4;4;4;4;4	11966565;11966574;11976444;11977457;11980142;11980162;11981462;11993865;11993865	11966683;11966683;11976587;11977570;11980408;11980408;11981661;11994280;11993999	+;+;+;+;+;+;+;+;+	1260	1.64301	2.04818	1.55338	0.571147	0.538044	1.29009	2.0382	0.56185	0.896585	0.621659	0.602716	0.429001	0.620073
1700123O12Rik	4;4;4;4;4;4;4;4;4;4;4;4;4;4;4;4;4;4	10479962;10508028;10508031;10509660;10742888;10742888;10745714;10745986;10745990;10746578;10746820;10776504;10776504;10776504;10788485;10797642;10797642;10797642	10480139;10508098;10508098;10509818;10742904;10743064;10746087;10746087;10746087;10746693;10746920;10776563;10776563;10776563;10788612;10797798;10797811;10797795	-;-;-;-;-;-;-;-;-;-;-;-;-;-;-;-;-;-	1534	0	0	0	0	0	0	0	0	0	0	0	0	0
1700123O20Rik	14;14	54686171;54689804	54687120;54690742	+;+	1889	12.3108	11.7142	10.4477	13.1873	13.0027	9.81623	10.0076	11.9243	8.51056	9.84814	12.8112	13.8148	12.0342
1700123O21Rik	16;16;16;16	5975585;5993326;5994197;5998240	5975840;5993401;5994284;5998496	+;+;+;+	677	0	0.0811057	0	0.0817686	0	0	0	0	0	0	0	0	0
1700124L16Rik	6;6;6;6;6	83761756;83761756;83761756;83762465;83762602	83762060;83762865;83762060;83762508;83762842	-;-;-;-;-	1110	0.310839	0.544139	0.293882	0.3491	0.187924	0.379665	0.192802	0.318888	0.39144	0.0882083	0.228055	0.216433	0.162431
1700125G02Rik	4;4;4	124890888;124891308;124894480	124890981;124891429;124894782	-;-;-	519	0	0	0	0	0	0	0	0	0.167437	0	0	0	0
1700125G22Rik	3;3;3	27154026;27154740;27156636	27154310;27154931;27157019	+;+;+	861	0	0.127546	0.151549	0	0	0	0.165707	0	0	0	0	0	0.139604
1700125H03Rik	8;8;8;8;8;8;8	68368434;68368466;68369237;68369237;68371996;68371999;68375434	68368534;68368534;68369345;68369345;68372293;68372180;68375710	+;+;+;+;+;+;+	785	1.4944	2.23831	2.49332	1.26934	0.930044	1.38048	1.8175	1.06579	0.885602	1.12255	1.54787	0.765097	0.995276
1700125H20Rik	11;11;11;11;11;11;11;11;11;11;11	85170404;85171096;85172834;85172834;85173188;85174017;85174017;85178257;85178257;85180886;85180886	85170432;85171227;85172935;85172935;85173363;85174116;85174116;85178452;85178452;85181145;85181145	+;+;+;+;+;+;+;+;+;+;+	995	0	0.110369	0	0	0.0524109	0.0605066	0	0.258723	0.0873364	0.196806	0.101765	0.0603619	0.0604014
1700126A01Rik	1	57127340	57129400	+	2061	0	0	0	0	0	0	0	0	0	0	0	0	0
1700126G02Rik	6;6;6;6;6	143201397;143203260;143205040;143220878;143221299	143201601;143203506;143205117;143220922;143221448	-;-;-;-;-	725	18.3699	23.8568	24.6569	26.8006	22.6218	31.4722	32.4706	32.6225	24.4518	33.3573	23.673	21.7873	29.1378
1700126H18Rik	5;5;5	66166607;66180017;66191274	66166762;66180202;66191336	-;-;-	405	0.170386	0.135577	0.161091	0	0	0	0	0	0.429135	0.241756	0.375023	0	0
1700128A07Rik	14;14;14;14;14;14	106417187;106423695;106443211;106443311;106486403;106486403	106417444;106424084;106443404;106443404;106486520;106486492	-;-;-;-;-;-	960	0	0	0	0.0576639	0	0	0	0	0	0	0.105475	0.25025	0
1700128E19Rik	8;8	11713264;11720294	11713375;11722620	+;+	2439	0	0	0	0	0	0	0	0	0	0	0	0	0
1700128F08Rik	9;9;9;9	8221889;8221970;8225242;8241268	8222171;8222686;8225348;8241987	+;+;+;+	1625	0.0849308	0.10137	0	0.0340661	0.0320916	0.0370487	0.0438996	0	0	0.0602531	0	0	0.0369842
1700129C05Rik	14;14;14;14;14;14;14;14;14;14;14;14;14;14;14;14;14;14;14	59133040;59133239;59133242;59139604;59139604;59139604;59140004;59140004;59140004;59141326;59142113;59142113;59142113;59142458;59142458;59142458;59142458;59142871;59142871	59133418;59133418;59133418;59139675;59139675;59139675;59140102;59140102;59140102;59141435;59142193;59142193;59142193;59142893;59142568;59142568;59142893;59142893;59142893	-;-;-;-;-;-;-;-;-;-;-;-;-;-;-;-;-;-;-	1177	0	0	0	0.0470326	0.0443066	0	0	0.164038	0	0.0831871	0.0430146	0	0.153184
1700129L04Rik	15;15;15;15;15;15;15	95097542;95097616;95148836;95148836;95149068;95149159;95162217	95098308;95098308;95148994;95148994;95149364;95149318;95162394	-;-;-;-;-;-;-	1401	0.049255	0	0	0	0	0	0	0	0	0.0698867	0	0	0
1810006J02Rik	1;1;1;1;1;1;1	98131456;98131467;98133512;98133512;98134293;98138053;98143297	98131704;98131704;98133601;98133601;98134339;98138189;98144655	+;+;+;+;+;+;+	1882	0	0.0875269	0.173331	0.147071	0.249384	0.159947	0.341144	0.136785	0.369393	0.468226	0.269013	0.191477	0.127735
1810007C17Rik	12;12;12	49476991;49478010;49480530	49477219;49478157;49480862	-;-;-	710	0	0	0	0	0	0	0	0	0	0	0	0	0
1810007D17Rik	19;19;19	58606329;58628906;58629336	58606489;58629068;58629753	+;+;+	742	0	0	0	0	0	0	0	0	0	0	0	0	0.0809964
1810008B01Rik	8;8	124305132;124306362	124305814;124306507	-;-	829	7.49163	7.28582	9.99483	9.41542	9.18424	7.62537	7.83071	3.41583	2.41097	2.95269	5.74071	5.43366	9.642
1810008I18Rik	7;7;7;7	65803111;65804026;65804031;65805814	65803149;65804332;65806449;65806286	+;+;+;+	2463	0.476292	1.0032	0.21191	0.179805	0.14821	0.659972	0.173781	0.0522593	0.141128	0.357776	0.452221	0.365774	0.0732026
1810009A15Rik	19;19;19;19;19;19;19;19;19;19;19;19;19;19;19;19;19;19;19;19	8888853;8888899;8888915;8888929;8888939;8889124;8889124;8889124;8889637;8889637;8890003;8890003;8890003;8890003;8890003;8890411;8890411;8890411;8890411;8890411	8888964;8889248;8888964;8888964;8889248;8889727;8889248;8889248;8889727;8889727;8890100;8890100;8890100;8890100;8890100;8890741;8890465;8890546;8890881;8890746	+;+;+;+;+;+;+;+;+;+;+;+;+;+;+;+;+;+;+;+	1444	2.19014	2.9154	2.38693	2.9584	2.40773	2.12632	2.34661	1.73818	1.08324	1.26593	2.68813	3.59071	2.79562
1810009J06Rik	6;6;6;6;6	40964754;40966163;40966607;40967410;40968183	40964828;40966325;40966860;40967546;40968435	+;+;+;+;+	882	0	0	0	0	0	0	0	0	0	0	0	0	0
1810010D01Rik	7;7;7;7;7;7;7;7;7;7	145205825;145206365;145206389;145206756;145206929;145206929;145206955;145208026;145208026;145208026	145206581;145206581;145206581;145207005;145207182;145207005;145207005;145208117;145208119;145208080	-;-;-;-;-;-;-;-;-;-	1278	0.701942	1.03115	0.45945	0.346525	0.408051	0.635959	0.390734	0.226611	0.339983	0.383064	0.713073	1.31587	0.564313
1810010H24Rik	11;11;11;11;11;11;11;11	107025681;107025871;107027810;107028223;107028363;107028366;107029585;107029585	107025753;107025969;107028268;107028268;107028557;107028557;107030443;107030438	+;+;+;+;+;+;+;+	1685	16.7089	25.1895	17.4624	9.00173	3.99241	18.4721	15.1141	3.62846	1.08302	3.48645	5.96421	6.09512	3.13872
1810010K12Rik	2;2;2	19451828;19452470;19454031	19453151;19452712;19454995	+;+;+	2289	0	0	0	0	0	0	0	0	0	0	0	0	0
1810011H11Rik	14;14;14;14;14	32785963;32805124;32806780;32808349;32816847	32786096;32805177;32806911;32808379;32817968	+;+;+;+;+	1473	2.10813	1.93839	1.55021	3.08167	2.92076	2.41143	1.98562	0.262148	0.0589951	0.0664706	0.240595	0.937802	3.79446
1810011O10Rik	8	24437180	24438984	-	1805	19.0962	23.0281	27.398	11.7309	13.3189	27.2336	25.1359	4.5995	3.37007	5.47869	4.03903	3.3607	6.07653
1810012K08Rik	2;2	26138546;26139364	26138939;26139543	+;+	574	14.0657	12.0531	12.6165	10.705	7.9041	10.3836	9.94243	6.95149	6.20712	4.94673	8.90844	12.5561	8.16681
1810012K16Rik	8;8;8	22398721;22399147;22399445	22398983;22399278;22399596	+;+;+	547	1.00923	0.200763	0.477089	0.202403	0.381345	0.770436	0.26083	0.352966	0.317732	0.53699	0.185112	0.658794	0.439483
1810013D15Rik	3;3;3;3;3;3;3;3;3;3;3;3;3;3;3	157925220;157925269;157925271;157925711;157926110;157926110;157926206;157926789;157926789;157926789;157928363;157928363;157936936;157936936;157937905	157926246;157925346;157925346;157926246;157926201;157926246;157926246;157926879;157927025;157927147;157928450;157928450;157937073;157937131;157938355	+;+;+;+;+;+;+;+;+;+;+;+;+;+;+	2121	0.0325348	0.103552	0	0	0.0491739	0.0283848	0	0	0	0	0	0	0
1810013L24Rik	16;16;16;16	8830100;8831321;8842968;8855794	8830685;8831401;8843243;8858916	+;+;+;+	4066	19.3985	20.7967	20.2898	18.6521	15.5254	24.9715	24.8609	18.8039	18.8076	19.2523	19.0821	27.0167	25.2089
1810014B01Rik	10;10;10;10;10	86685601;86685880;86688534;86692218;86694093	86685737;86685996;86689138;86692305;86694806	+;+;+;+;+	1661	131.926	158.081	152.715	197.5	143.009	146.976	161.099	54.4771	33.3787	34.4251	91.3806	120.138	128.684
1810017P11Rik	5	114975456	114976013	+	558	0	0	0	0	0	0	0	0	0	0	0	0	0
1810018F18Rik	19;19;19;19;19;19;19;19;19;19;19;19;19;19;19;19	58698917;58698917;58699082;58699082;58699082;58699951;58700230;58703784;58705066;58708644;58710235;58710446;58711216;58713684;58714845;58715608	58698944;58698944;58699127;58699330;58699127;58701323;58700385;58703906;58705200;58708755;58710345;58710563;58711335;58713815;58714953;58715770	+;+;+;+;+;+;+;+;+;+;+;+;+;+;+;+	2773	0	0	0	0	0	0	0	0	0	0	0	0	0
1810019D21Rik	8;8;8;8;8;8;8;8;8;8	106135400;106135435;106136531;106137065;106137167;106137167;106137469;106137828;106137828;106137828	106135732;106135621;106136688;106137350;106137350;106137350;106137544;106137891;106138100;106138525	+;+;+;+;+;+;+;+;+;+	1551	14.8601	13.9838	12.1566	7.70934	7.397	12.7317	9.75076	3.56849	1.84893	1.89383	6.85488	5.88597	9.26096
1810019N24Rik	7;7;7	12948592;12949690;12961689	12949985;12950066;12961768	-;-;-	1555	0.576901	0.494354	0.209781	0.177998	0.570116	0.696896	0.321131	0.248324	0.335304	0.188896	0.260466	0.386239	0.42514
1810020O05Rik	6;6;6;6;6	87675593;87679827;87680151;87681104;87690548	87675896;87679983;87680271;87681268;87690847	-;-;-;-;-	1047	1.05454	3.04174	0.685444	0.740213	0.149424	1.32254	0.817615	0.73762	1.57698	1.68329	0.483555	0.516276	0.114803
1810021B22Rik	15;15;15;15;15;15;15;15;15;15;15;15;15;15;15;15;15	89071196;89071196;89071198;89071198;89071198;89071571;89071571;89071571;89071571;89071571;89074073;89074073;89074073;89075099;89075099;89075099;89075614	89071336;89071336;89071336;89071336;89071336;89071748;89071748;89071718;89071718;89071748;89074198;89074198;89074297;89075211;89075149;89075149;89075852	-;-;-;-;-;-;-;-;-;-;-;-;-;-;-;-;-	896	1.30927	1.83846	1.31066	0.556045	1.04763	1.88138	0.875788	1.50838	1.16384	0.874207	1.01708	1.13953	0.737827
1810022K09Rik	3;3;3;3;3;3;3;3;3;3;3;3;3;3;3;3	14606284;14606289;14606289;14606293;14607177;14607177;14609184;14609541;14609541;14609541;14609541;14611017;14611210;14611210;14611210;14611210	14606408;14607293;14606408;14606408;14607293;14607293;14609657;14609657;14609657;14609657;14609657;14611221;14611243;14611254;14611261;14611285	-;-;-;-;-;-;-;-;-;-;-;-;-;-;-;-	1753	11.1008	12.1062	11.7793	12.3472	6.60414	12.3121	12.1879	12.9412	9.26997	8.96449	12.6498	12.2998	11.4336
1810024B03Rik	2;2;2;2	127186355;127202567;127208175;127208175	127187514;127204850;127208280;127208254	-;-;-;-	3550	0.524836	0.66509	0.532962	0.358653	0.381935	0.830986	0.522468	0.416963	0.171352	0.248226	0.427844	0.490632	0.694105
1810026B05Rik	7;7;7;7;7;7;7;7;7;7;7;7;7;7;7;7;7;7;7;7;7;7;7;7;7;7;7;7;7;7;7;7	73539203;73544036;73544037;73544042;73544243;73544264;73544306;73549597;73549597;73549597;73549597;73549597;73549597;73553499;73555146;73555255;73555255;73555255;73555255;73555255;73555855;73555855;73555855;73555855;73555855;73555855;73557775;73558039;73558039;73558039;73558039;73558039	73544382;73544410;73544382;73546865;73544382;73544382;73544382;73549652;73549652;73549652;73549652;73549652;73549652;73553589;73555333;73555333;73555333;73555333;73555333;73555333;73555920;73555920;73555920;73555920;73555920;73555920;73557973;73558248;73558386;73558147;73558395;73558244	-;-;-;-;-;-;-;-;-;-;-;-;-;-;-;-;-;-;-;-;-;-;-;-;-;-;-;-;-;-;-;-	8620	5.98601	6.97027	8.17415	5.09583	4.93962	11.4087	9.37228	5.25984	7.39454	9.15504	6.65449	8.13459	11.0176
1810026J23Rik	9;9	21592722;21593150	21593070;21595970	+;+	3170	10.3074	9.5527	8.98362	9.19421	8.53794	8.40388	8.41641	9.13591	8.37472	8.324	8.77608	8.59219	8.81584
1810030O07Rik	X;X;X;X;X;X;X	12654879;12657862;12662650;12664500;12669527;12673026;12673326	12656486;12658024;12662829;12664649;12669646;12673160;12673668	-;-;-;-;-;-;-	2699	13.9853	12.8167	14.4794	12.5523	10.5689	13.2052	14.0908	7.55883	4.82955	5.84057	10.7296	10.3698	11.3786
1810032O08Rik	11;11;11;11;11;11;11;11;11;11;11;11;11;11;11;11;11;11;11;11;11;11;11;11;11;11;11;11;11	116671660;116671669;116671669;116671696;116671708;116671881;116672164;116672164;116672164;116672164;116672664;116672664;116672664;116672664;116672664;116672692;116673938;116673938;116673938;116673938;116673938;116673938;116674300;116674300;116674300;116674300;116675489;116675508;116675508	116671756;116671756;116671756;116671756;116671756;116672355;116672355;116672355;116672622;116672355;116672738;116672738;116672738;116672738;116672738;116672738;116674071;116673974;116674587;116674071;116674071;116674071;116674375;116675798;116674375;116674375;116675799;116675795;116675798	+;+;+;+;+;+;+;+;+;+;+;+;+;+;+;+;+;+;+;+;+;+;+;+;+;+;+;+;+	2776	2.17509	2.09665	1.85667	1.83461	2.30124	2.36392	2.46698	3.55867	5.08689	5.29059	3.21897	1.96883	1.91599
1810034E14Rik	13;13;13;13;13;13;13	64248700;64248772;64266377;64266442;64266477;64267021;64267969	64249203;64249203;64266549;64266474;64266549;64268148;64268148	+;+;+;+;+;+;+	1805	2.33207	2.58572	2.27714	1.22676	1.27122	2.26808	2.29227	1.17662	0.86659	0.705178	1.57074	1.53062	0.832401
1810037I17Rik	3;3	122924203;122925479	122924656;122926184	+;+	1160	29.1789	26.3182	28.0371	41.2794	32.4132	21.798	26.3824	35.1746	32.8496	36.1259	33.4102	31.5315	30.8268
1810041H14Rik	14;14;14;14;14;14	121876725;121876811;121876859;121878124;121878290;121879208	121877011;121877011;121877011;121878270;121878504;121879409	-;-;-;-;-;-	851	2.02721	1.35497	0.919979	1.10585	0.674075	0.919687	0.58679	1.36126	1.02115	1.49571	1.01137	0.776335	0.282488
1810041L15Rik	15;15;15;15;15;15;15;15;15;15;15;15;15;15;15;15;15;15	84379203;84380047;84406446;84406446;84406569;84417100;84417100;84417100;84417253;84420137;84420137;84420137;84420137;84435145;84443451;84446362;84446362;84446999	84384392;84384392;84406763;84406763;84406763;84417313;84417313;84417313;84417313;84420232;84420232;84420232;84420232;84435282;84443697;84446610;84446545;84447097	-;-;-;-;-;-;-;-;-;-;-;-;-;-;-;-;-;-	6551	0.505618	0.565765	0.31869	0.0591515	0.119407	0.477883	0.239568	0.275074	0.238772	0.239136	0.231849	0.137521	0.165133
1810043G02Rik	10;10;10;10;10;10;10;10;10;10;10;10;10;10;10;10;10;10;10;10;10;10;10;10;10;10;10;10;10;10;10;10;10;10;10;10;10;10;10	77978524;77978654;77978671;77978673;77978681;77978693;77979753;77979753;77979753;77979753;77979753;77980493;77980501;77980501;77980501;77981584;77981584;77981584;77981584;77981762;77982550;77982870;77982870;77982870;77982870;77982870;77983516;77983516;77983516;77983516;77983516;77983516;77983945;77984419;77984419;77984419;77984419;77985039;77986718	77978781;77978781;77978781;77978781;77983041;77978781;77980051;77979771;77983041;77979771;77980547;77980547;77980522;77980547;77980547;77981813;77981813;77981813;77981813;77981813;77982686;77982894;77983041;77983041;77983041;77983041;77983591;77985436;77983591;77983591;77983591;77983591;77984005;77984479;77985434;77985255;77985434;77985096;77986905	+;+;+;+;+;+;+;+;+;+;+;+;+;+;+;+;+;+;+;+;+;+;+;+;+;+;+;+;+;+;+;+;+;+;+;+;+;+;+	6627	1.71813	1.84354	1.24045	2.13009	2.36075	1.99863	1.19487	1.15566	3.12089	1.56611	1.75713	1.7854	2.31256
1810044D09Rik	6;6	91440987;91441442	91441158;91441755	+;+	486	0.425965	1.58173	0.53697	0.56952	0.107302	0.867137	0.587135	1.1918	1.07284	0.805854	1.14591	1.11222	0.98929
1810046K07Rik	9;9;9;9;9;9;9;9;9	51289686;51290444;51291547;51291547;51294957;51294957;51312551;51318281;51328808	51290448;51290448;51291845;51291845;51294999;51294999;51312669;51318383;51328917	-;-;-;-;-;-;-;-;-	1437	0.192084	0.305684	0.136204	0.0385229	0	0.0418957	0.049643	0.22393	0.241892	0.476951	0.246623	0.0835909	0.0418228
1810049J17Rik	15	12321438	12321899	-	462	23.8983	29.237	33.1392	26.6003	23.9298	26.9746	24.8598	39.2831	32.3523	39.4188	34.7384	33.5401	25.7569
1810053B23Rik	16;16;16;16;16;16;16;16;16;16;16;16;16;16;16;16;16;16;16;16;16	93343281;93343724;93344275;93344744;93344875;93344875;93344875;93346057;93346797;93346860;93346860;93346860;93346860;93353031;93353982;93353982;93358625;93358995;93358995;93359454;93359497	93344371;93344371;93344371;93345047;93345047;93345047;93345047;93347188;93347188;93347099;93347099;93347188;93347099;93353189;93354071;93354061;93358712;93359058;93359058;93359543;93359511	-;-;-;-;-;-;-;-;-;-;-;-;-;-;-;-;-;-;-;-;-	3018	0.0228649	0.272905	0.0864703	0.201766	0.0518378	0.0997417	0.0709115	0.0213245	0.201557	0.0973273	0.150979	0.199006	0.0696977
1810055G02Rik	19;19;19;19	3708333;3714404;3715638;3716491	3708436;3714625;3715802;3717881	+;+;+;+	1882	3.40998	4.17212	3.60529	5.11805	4.93225	2.81507	3.25982	6.32631	7.24934	6.65921	8.6622	6.6698	5.39681
1810058I24Rik	6;6;6;6;6;6;6;6;6;6	35252654;35252716;35252732;35252956;35260410;35260410;35260410;35261159;35261159;35261159	35252782;35252782;35253045;35253045;35260463;35260463;35260463;35261637;35262022;35263496	+;+;+;+;+;+;+;+;+;+	2784	6.09754	10.2165	7.38189	6.62141	6.40622	9.28795	7.53343	6.61143	5.07227	4.18514	7.7288	10.9808	9.56322
1810059C17Rik	2;2;2	18054193;18055713;18056520	18054476;18055821;18056613	-;-;-	487	0.283393	0.338246	0.937768	0.11367	0.107082	1.23622	0.878894	0	0.178439	0	0.311878	0	0.246815
1810059H22Rik	5;5;5;5;5;5;5;5;5;5;5;5;5;5;5;5;5;5;5;5	148953748;148954644;148954966;148958598;148958670;148958889;148959132;148959148;148959148;148959148;148959909;148963894;148963894;148963942;148964761;148964843;148964942;148969744;148969744;148969744	148954672;148956497;148955201;148958730;148958730;148959680;148959210;148959704;148959210;148959210;148960210;148964274;148963995;148963995;148965023;148965023;148965023;148970122;148969896;148969882	-;-;-;-;-;-;-;-;-;-;-;-;-;-;-;-;-;-;-;-	5024	0.766843	0.781442	0.480483	0.352595	0.259499	0.633078	0.276885	0.438742	0.916737	0.740571	0.987572	0.685359	0.34093
1810062G17Rik	3;3;3	36475937;36479484;36481776	36476239;36479567;36482299	+;+;+	911	1.21197	0.663001	0.50131	0.303827	0.400705	0.660857	0.548143	0.211934	0.190779	0.537383	0.77804	0.362602	0.527766
1810062O18Rik	14;14;14;14;14;14;14;14;14;14;14;14;14;14;14;14;14;14;14;14;14	20546079;20546114;20546257;20546293;20550071;20561986;20561986;20561986;20561986;20564781;20564781;20564781;20564781;20565011;20565011;20565011;20566948;20569870;20570342;20570342;20570342	20546344;20546344;20546344;20546344;20550175;20562096;20562096;20562096;20562141;20564973;20564839;20564839;20565005;20565047;20565047;20565047;20567049;20570022;20570687;20570680;20570543	+;+;+;+;+;+;+;+;+;+;+;+;+;+;+;+;+;+;+;+;+	1390	16.1842	14.4974	14.4565	6.96945	5.43999	13.5134	13.2923	7.77845	4.62632	5.98738	9.87067	7.99361	4.66959
1810063I02Rik	11;11	59921499;59921725	59921607;59921889	+;+	274	0	0.601189	0	0	0	1.75778	0	0	0.317152	1.07202	0.184774	0.438395	0.219341
1810064F22Rik	9;9;9;9;9;9;9;9	22196963;22199977;22206151;22206781;22207341;22208883;22213723;22213723	22197215;22200043;22206276;22208949;22208546;22208949;22213860;22213839	-;-;-;-;-;-;-;-	2753	2.80737	3.17125	1.80108	0.924968	0.606162	2.03377	1.39927	3.13254	1.48358	2.91635	3.31023	3.51241	1.17885
1810065E05Rik	11;11;11;11;11;11	58421111;58421681;58422196;58422732;58423815;58425665	58421190;58421770;58422306;58422884;58423946;58426024	+;+;+;+;+;+	926	0	0	0.140911	0.0597812	0	0	0	0	0	0	0	0	0
2010001A14Rik	11;11;11;11;11;11;11;11;11;11	57795499;57795519;57795606;57796026;57796026;57796312;57796312;57801234;57801234;57801234	57795794;57795794;57795794;57796173;57796173;57796397;57796397;57801398;57801414;57801417	-;-;-;-;-;-;-;-;-;-	714	2.22289	2.6916	3.10675	1.78322	1.60683	2.69822	1.79841	0.540818	1.4605	1.09704	2.83631	2.01883	1.43094
2010001K21Rik	13;13	47010673;47011025	47011020;47011195	+;+	519	5.85024	7.40578	2.76555	1.81325	0.602877	2.668	1.37451	0.496011	1.17206	0.754614	1.56079	1.0415	0.69479
2010003K11Rik	19;19	4496790;4498244	4497614;4498583	-;-	1165	0.0592328	0	0.112003	0	0.089526	0.0516773	0	0.165727	0.149184	0	0.130373	0	0
2010005H15Rik	16;16;16;16;16;16;16;16;16;16;16;16	36221468;36221562;36238824;36253014;36253014;36253046;36255541;36255541;36255541;36257247;36257247;36257247	36221646;36221646;36238885;36253111;36253111;36253111;36255642;36255642;36255642;36257372;36257444;36257427	+;+;+;+;+;+;+;+;+;+;+;+	639	0.917924	1.63265	1.5315	4.20161	1.87703	1.41324	1.33966	12.3377	16.4552	10.7258	6.14035	7.61325	4.27938
2010007H06Rik	9;9;9	51278513;51279498;51280295	51278733;51284210;51280920	+;+;+	4934	2.32165	3.21617	1.37518	0.841468	0.581311	2.12313	1.09883	0.456528	0.898234	1.07159	1.19029	1.48507	0.56031
2010008C14Rik	6	125083437	125084029	+	593	0.349104	0.740756	0.77014	0.933513	0.527645	1.42134	0.72179	0.217057	0	0	0.256129	0.506409	1.01348
2010009K17Rik	2;2;2;2	158070367;158084077;158086556;158091631	158070635;158084126;158086636;158091797	-;-;-;-	567	1.09534	0.774724	0.575325	0.97632	0.643813	1.91124	1.00652	2.1566	2.29893	2.59024	2.14299	1.27111	1.37794
2010010A06Rik	18;18;18;18;18;18	75288655;75288926;75295675;75296710;75297183;75297183	75289169;75289183;75296063;75296867;75297329;75297317	-;-;-;-;-;-	1223	0.620661	0.246931	0.320075	0.0452636	0.12792	0.344586	0.116659	0.0526226	0	0	0.165587	0.147326	0.147423
2010013B24Rik	6;6	145303152;145308524	145303470;145308951	+;+	747	0.277134	0.0735054	0.174677	0.296425	0.209433	0.644756	0.381992	0.430772	0	0	0.406652	0.643214	0.241363
2010015M23Rik	11;11	88039578;88046621	88040036;88047360	-;-	1199	0.805745	0.870111	0.489722	0.738714	0.782885	1.10466	0.356982	0.429407	0.507338	0.653286	0.422253	0.701285	0.801993
2010016I18Rik	3;3;3;3;3;3;3	106481982;106482000;106482013;106482013;106483146;106484070;106485804	106483433;106482151;106483437;106483461;106483834;106485848;106485913	-;-;-;-;-;-;-	3697	3.97575	3.64621	3.00003	4.22255	3.89318	4.95865	3.56974	8.704	14.6674	13.5068	13.2425	11.2907	7.59167
2010103J01Rik	1;1	185312187;185313530	185312300;185313803	+;+	388	3.4681	4.17475	2.69039	2.99615	2.75529	3.87913	2.11437	2.23924	1.67976	1.89261	2.34873	1.23835	1.85874
2010106C02Rik	17;17;17	86285164;86286199;86286901	86285448;86286295;86287178	-;-;-	660	4.28675	3.91016	3.16324	2.51624	2.9235	3.73995	4.75579	4.68054	3.42332	3.11536	4.52585	4.00401	2.36755
2010106E10Rik	X;X;X;X;X;X;X;X;X;X;X;X;X;X	112495274;112495275;112497873;112497873;112512392;112512392;112515189;112515189;112556250;112556250;112556969;112556969;112557847;112557847	112495419;112495419;112497978;112497978;112512583;112512583;112515312;112515282;112556332;112556332;112557107;112557107;112558333;112558343	+;+;+;+;+;+;+;+;+;+;+;+;+;+	1287	0	0	0	0	0	0	0	0	0	0	0	0	0
2010107E04Rik	12;12;12;12	111961376;111962433;111963230;111966924	111961538;111962456;111963353;111966977	-;-;-;-	365	36.6773	47.086	39.6813	53.689	45.2909	34.9679	43.5839	41.9645	29.9983	27.3615	45.3573	43.1116	38.8588
2010107G23Rik	10;10;10;10;10;10;10;10;10;10;10;10;10;10;10;10;10;10;10;10;10;10;10;10;10;10;10;10;10;10;10;10;10;10;10;10;10;10	62107655;62108210;62108210;62108210;62108212;62108835;62108917;62108918;62108920;62109884;62109884;62109884;62109884;62109884;62109884;62109884;62109884;62109947;62110236;62110236;62110236;62110236;62110598;62110706;62110957;62110959;62110959;62134489;62134489;62134489;62134489;62134521;62139662;62142266;62142266;62143870;62143870;62143870	62109123;62109123;62109123;62109123;62109123;62109123;62109123;62109123;62109123;62110012;62110031;62110012;62110010;62110012;62110012;62110012;62110012;62110012;62110496;62110314;62110314;62110314;62110968;62110945;62111013;62111050;62111050;62134761;62134706;62134761;62134761;62134761;62139870;62142349;62142382;62143920;62143910;62143906	-;-;-;-;-;-;-;-;-;-;-;-;-;-;-;-;-;-;-;-;-;-;-;-;-;-;-;-;-;-;-;-;-;-;-;-;-;-	2981	1.66671	1.15122	1.2475	1.07706	0.612281	0.908817	1.12474	0.496551	0.291512	0.492676	0.526492	0.503691	0.826593
2010109A12Rik	5;5;5;5	93206518;93206533;93208099;93213229	93206723;93207449;93208194;93213475	+;+;+;+	1275	0.487103	0.38759	0.921061	0.260505	0.490813	0.755502	0.559505	0.807622	1.43129	0.460759	0.4765	0.518166	0.754188
2010109I03Rik	15;15;15;15;15;15	74876987;74878339;74880675;74880675;74881614;74896956	74880032;74880032;74880773;74880773;74881704;74897021	-;-;-;-;-;-	3302	0.104492	0.315949	0.138308	0.0502944	0.0947587	0.200559	0.0216042	0.350828	0.184221	0.296521	0.398647	0.163701	0.163808
2010109P13Rik	6	100143423	100143814	-	392	0	0	0	0.141218	0	0	0	0	0	0	0	0	0
2010110E17Rik	8	86885688	86886566	+	879	0	0.0624671	0.0742228	0.944665	0.47462	0.273966	0.162314	3.29475	5.14083	3.1189	1.20955	4.37298	3.89723
2010110G14Rik	3;3;3	130838455;130842064;130937324	130838926;130842104;130937337	-;-;-	527	0	0	0	0	0.0989542	0	0	0	0	0	0	0	0
2010110K18Rik	18;18;18;18;18	34751809;34751912;34754484;34754676;34758232	34752135;34752135;34754569;34756662;34758685	+;+;+;+;+	2854	0	0.0577175	0	0.0775856	0.0548166	0.0421893	0.0499908	0.135299	0	0	0	0.0420884	0.0421159
2010111I01Rik	13;13;13;13;13;13;13;13;13;13;13;13;13;13;13;13;13;13;13;13;13;13;13;13;13;13;13;13;13;13;13;13;13;13;13	63014934;63015167;63033023;63033023;63061035;63061041;63068040;63068053;63156546;63156546;63170941;63170941;63190479;63190479;63191066;63191066;63199507;63199507;63210106;63210106;63240087;63240087;63240257;63240257;63282142;63282142;63282142;63296858;63296858;63296858;63298712;63298712;63298712;63301779;63323779	63015963;63015963;63033189;63033189;63061194;63061210;63068285;63068285;63156735;63156735;63171047;63171047;63190581;63190581;63191173;63191173;63199550;63199550;63210166;63210166;63240155;63240155;63240331;63240331;63282258;63282258;63282258;63296944;63296944;63296944;63298856;63298856;63299656;63302284;63326096	+;+;+;+;+;+;+;+;+;+;+;+;+;+;+;+;+;+;+;+;+;+;+;+;+;+;+;+;+;+;+;+;+;+;+	6349	9.55914	9.73808	8.74481	9.35556	11.0269	11.2414	8.96627	8.8594	9.00615	9.28113	8.41278	8.40974	10.9142
2010204K13Rik	X;X;X;X;X;X;X;X;X;X	7411817;7412087;7412103;7412106;7412685;7420928;7422879;7424130;7429507;7445009	7412532;7412532;7412532;7412532;7412825;7421085;7422988;7424284;7429674;7445143	-;-;-;-;-;-;-;-;-;-	1583	0.305145	0.971219	0.638818	0.209819	0.263545	0.494411	0.450644	0.121966	0.109791	0	0.287842	0.265585	0.227793
2010300C02Rik	1;1;1;1;1;1;1;1;1;1;1;1;1;1;1;1;1;1	37611677;37611677;37613337;37613337;37614481;37614481;37623761;37623761;37628217;37631321;37631816;37637861;37637986;37644561;37644561;37676342;37719570;37719570	37612396;37612399;37613481;37613481;37614668;37614668;37625242;37626068;37628426;37631482;37631951;37638029;37638029;37644640;37644640;37676779;37719795;37720085	-;-;-;-;-;-;-;-;-;-;-;-;-;-;-;-;-;-	5075	8.17809	8.9363	5.81507	4.98129	3.16407	5.43118	4.78794	4.40255	4.02821	3.25895	5.28708	4.39924	2.55792
2010300F17Rik	11;11;11;11	96712982;96746032;96746371;96747007	96714408;96746631;96747436;96747410	-;-;-;-	2832	0.2193	0.310218	0.299486	0.625507	0.44194	0.510204	0.201517	0.249976	0.214795	0.276585	0.518438	0.466569	0.891304
2010308F09Rik	X;X;X;X;X;X	13234641;13234684;13235418;13235418;13236201;13247505	13234947;13234947;13235499;13235499;13236283;13247736	-;-;-;-;-;-	704	0	0.233985	0.0926731	0	0	0.0855172	0.101331	0.0914167	0.123437	0	0.14383	0.0853126	0
2010309G21Rik	16;16;16;16	19051367;19065561;19099252;19106706	19051591;19065653;19099347;19106749	+;+;+;+	458	0.753344	0.659382	0.569798	0.48347	1.02476	1.0516	1.24606	0.421555	0.569212	0	0.331626	0.262271	0.590496
2010310C07Rik	6;6;6;6;6;6;6	42370671;42371253;42377956;42378906;42378906;42379146;42379988	42370696;42371398;42378009;42379007;42379007;42381215;42380555	+;+;+;+;+;+;+	2398	1.69782	1.9005	1.2243	1.33892	1.35918	1.38083	1.51717	2.91192	3.1165	2.65397	1.52011	1.75321	1.09021
2010315B03Rik	9;9;9;9;9;9;9;9;9;9;9;9;9;9;9;9;9;9;9;9;9	124291804;124293641;124293831;124293843;124295098;124295098;124295098;124295098;124295358;124295358;124295358;124295358;124300720;124304656;124304656;124311676;124311676;124312560;124312560;124312560;124312560	124294101;124294101;124294101;124294101;124295158;124295158;124295158;124295158;124295484;124295484;124295484;124295484;124301723;124304718;124304718;124311899;124311750;124312671;124312671;124312642;124312696	-;-;-;-;-;-;-;-;-;-;-;-;-;-;-;-;-;-;-;-;-	3914	3.66717	4.2928	5.01732	3.73386	2.57147	6.61414	5.01218	2.63086	2.13142	3.17699	4.39795	2.77743	5.37424
2010320M18Rik	8	70776815	70777823	+	1009	3.28276	2.93861	2.78038	2.414	2.5325	4.05736	3.53503	1.65837	1.89474	1.74668	2.91024	4.04766	2.08472
2010320O07Rik	18;18	38209772;38228720	38209870;38229145	+;+	525	1.05152	1.56882	1.49124	0.843541	1.29131	1.26142	2.17408	0	0.49657	0.186498	0.771477	0.686401	0.343425
2200002A13Rik	7	127897568	127898276	+	709	0.097329	0.0774451	0	0	0	0.0849141	0	0.0907721	0.122567	0.138098	0	0	0
2200002D01Rik	7;7;7;7;7;7;7	29246561;29247572;29247897;29247897;29248128;29248128;29248357	29247734;29247734;29247965;29247965;29248338;29248240;29248466	-;-;-;-;-;-;-	1564	6.08879	5.72257	5.00577	6.30026	6.20185	3.88786	5.56464	5.80204	6.13966	6.51072	7.60717	7.10429	7.32029
2200002J24Rik	7;7;7;7;7;7;7;7;7;7;7;7;7;7	30698926;30698936;30698952;30699553;30699557;30699557;30699773;30699773;30699773;30699783;30700246;30700246;30700246;30700246	30698986;30698986;30698982;30699608;30699608;30699608;30699980;30699980;30699980;30699980;30700534;30700380;30700528;30700536	+;+;+;+;+;+;+;+;+;+;+;+;+;+	616	0	0.0891373	0	0	0	0	0	0	0	0	0	0	0
2200007N16Rik	7	24666733	24666970	+	238	0	0	0	0	0	0	0	0	0	0	0	0	0.505037
2210008F06Rik	11;11	77489854;77490486	77490011;77491409	+;+	1082	0.318883	0	0.120595	0.0511621	0	0.111283	0.263722	0.05948	0.160628	0	0.0467913	0.0555084	0.111089
2210010C04Rik	6;6;6;6;6	41030268;41032305;41032942;41034244;41035439	41031784;41032441;41033195;41034406;41035509	-;-;-;-;-	2142	0	0	0	0	0	0	0	0	0	0	0	0	0
2210011C24Rik	8;8;8;8;8;8;8;8;8;8;8;8	84010222;84010239;84010711;84010767;84010959;84011141;84011141;84011141;84011444;84011452;84012114;84012114	84010492;84010492;84010772;84010772;84011007;84011411;84011411;84012158;84011770;84011748;84012156;84012171	-;-;-;-;-;-;-;-;-;-;-;-	1413	6.32435	4.08025	3.64763	0.724778	0.73813	2.21558	4.89716	1.27531	0.369001	0.207879	0.62703	0.382548	1.06333
2210011K15Rik	1;1	121355116;121359812	121356767;121359900	-;-	1741	0.079272	0.0315385	0	0.0317963	0	0	0	0.295726	0.149741	0	0.0581599	0	0
2210013O21Rik	X;X;X;X;X;X;X;X;X;X;X;X;X;X;X;X;X;X;X;X;X;X	153723590;153723593;153723610;153723627;153723939;153725705;153725705;153725705;153725705;153725705;153725833;153726943;153728862;153728862;153728862;153728862;153728862;153741040;153741040;153741040;153741040;153741040	153723937;153724125;153723937;153723937;153724125;153725841;153725841;153725841;153725841;153725841;153725841;153727032;153728939;153728939;153729188;153728939;153728939;153741122;153741084;153741920;153741262;153741264	+;+;+;+;+;+;+;+;+;+;+;+;+;+;+;+;+;+;+;+;+;+	1971	4.5514	5.18163	5.82576	3.73543	3.49247	5.25373	6.37001	4.53865	2.46899	2.18574	3.67317	4.1137	4.17738
2210016F16Rik	13;13;13;13	58380046;58382408;58384150;58384824	58382009;58382603;58384409;58385225	-;-;-;-	2822	6.24773	6.68359	6.65828	8.10155	7.32708	6.68816	5.3844	5.86104	5.57365	6.83505	7.46326	7.53412	7.53904
2210016L21Rik	5;5;5;5;5;5;5;5;5;5;5;5;5;5;5;5;5;5;5;5;5;5	114942158;114942204;114942210;114942231;114945786;114945786;114945786;114945786;114945805;114946018;114946018;114946018;114946018;114946018;114946291;114946291;114946291;114946291;114947163;114947163;114947682;114947682	114942355;114942355;114942355;114942355;114945907;114945828;114945828;114945828;114945907;114946116;114946217;114946116;114946116;114946116;114946364;114946846;114946880;114946364;114947253;114947253;114947784;114949783	+;+;+;+;+;+;+;+;+;+;+;+;+;+;+;+;+;+;+;+;+;+	3303	4.53356	4.24324	5.15535	3.41898	4.29443	3.88237	3.71479	2.5135	1.89427	2.63824	3.28018	3.40941	3.69366
2210017I01Rik	3;3	92604718;92607225	92605271;92607492	-;-	822	0.167898	0.267195	0.158739	0	0	0.292964	0.520707	0	0.105717	0.238227	0	0.0730658	0
2210019I11Rik	5;5;5;5;5;5;5;5;5;5;5;5;5;5	147228596;147230743;147230763;147231202;147231202;147237312;147238666;147239189;147239189;147240547;147240547;147270870;147271220;147271220	147229201;147230847;147230847;147231289;147231289;147237424;147239051;147239413;147239413;147240664;147240664;147270995;147271502;147271521	-;-;-;-;-;-;-;-;-;-;-;-;-;-	2069	0	0	0	0	0	0	0	0	0	0	0	0.0290286	0
2210406H18Rik	7	121062852	121063959	-	1108	2.30436	2.25482	1.76648	5.47078	4.35358	3.45033	1.73835	7.84138	11.137	8.39492	8.54465	11.4374	10.2787
2210406O10Rik	5;5;5;5;5;5;5;5;5;5	36447611;36454967;36455768;36455834;36458385;36464515;36464515;36464515;36464515;36464725	36447923;36456411;36456411;36456411;36458759;36464853;36464812;36464821;36464720;36464811	-;-;-;-;-;-;-;-;-;-	2472	0	0.111061	0.0263923	0	0.0421916	0.0730632	0.028858	0.0260345	0.0351536	0	0.0204807	0.0242962	0
2210407C18Rik	11;11;11;11;11;11;11;11;11;11;11;11;11;11;11	58608204;58608209;58610678;58610678;58611979;58611979;58612315;58612514;58612514;58612806;58612806;58613416;58613416;58613416;58615935	58608512;58608512;58610812;58610812;58612134;58612134;58612895;58612627;58612627;58612895;58612895;58613492;58613485;58613468;58616075	-;-;-;-;-;-;-;-;-;-;-;-;-;-;-	1399	0	0	0	0.197846	0	0.0860673	0	0	0	0.349933	0.0361888	0	0
2210408F21Rik	6;6;6;6;6;6;6;6;6;6;6;6;6;6;6;6;6;6;6;6;6;6;6;6;6;6;6;6;6;6;6;6;6;6;6;6;6;6;6;6;6;6;6;6;6;6;6;6;6;6;6;6;6;6;6;6;6;6;6;6;6;6;6;6;6;6;6;6;6;6;6;6;6;6;6;6	31220351;31220351;31220351;31220357;31220405;31220405;31220422;31220422;31220435;31220441;31220447;31244105;31244105;31249818;31277848;31277848;31277848;31277848;31277848;31277848;31277848;31285003;31285003;31285003;31285003;31285003;31285003;31285003;31285003;31285003;31285004;31292534;31293018;31321971;31328289;31328289;31328289;31328289;31328289;31328289;31328289;31328289;31328289;31328332;313…	31220519;31220519;31220519;31220519;31220519;31220519;31220519;31220519;31220519;31220519;31220519;31244358;31244358;31249936;31277955;31277955;31277955;31277955;31277955;31277955;31277955;31285120;31285120;31285120;31285120;31285120;31285120;31285120;31285120;31285120;31285120;31293666;31293220;31322054;31328360;31328389;31328360;31328300;31328360;31328389;31328360;31328360;31328389;31328360;313…	+;+;+;+;+;+;+;+;+;+;+;+;+;+;+;+;+;+;+;+;+;+;+;+;+;+;+;+;+;+;+;+;+;+;+;+;+;+;+;+;+;+;+;+;+;+;+;+;+;+;+;+;+;+;+;+;+;+;+;+;+;+;+;+;+;+;+;+;+;+;+;+;+;+;+;+	2406	3.61379	3.38899	3.11838	2.32381	2.51424	2.92763	2.54987	1.47118	0.993243	1.09875	2.50405	1.97205	2.4979
2210408I21Rik	13;13;13;13;13;13;13;13;13;13;13;13;13;13;13;13;13;13;13;13	77135540;77174853;77183601;77192554;77245201;77254123;77259841;77261889;77263532;77267662;77269762;77281042;77298467;77303296;77316348;77323365;77327867;77332303;77334269;77612527	77135630;77174984;77183769;77193223;77245362;77254217;77260068;77262154;77263682;77267852;77269944;77281152;77298606;77303460;77316572;77323770;77328023;77332458;77334363;77613291	+;+;+;+;+;+;+;+;+;+;+;+;+;+;+;+;+;+;+;+	4558	2.4299	3.85492	2.03255	1.46348	1.00682	2.78698	1.93289	1.97675	2.19251	3.13625	2.81021	1.79205	1.66137
2210409E12Rik	11	88972657	88973002	+	346	0	0	0	0	0	0	0	0	0	0	0	0	0
2210411M09Rik	1;1;1	180952064;180952852;180957988	180952382;180953013;180958149	-;-;-	643	21.2492	18.4879	13.6977	18.682	15.2473	18.0706	16.9744	17.8159	20.0018	15.3795	20.078	20.0823	19.5346
2210412B16Rik	5	130131327	130131824	+	498	0.4157	1.10258	0.786046	0.555797	0.837733	0.725351	0.286494	1.16309	1.57048	0.589827	0.406652	0.241205	1.20681
2210414B05Rik	4;4;4;4	3656508;3657290;3659234;3662824	3656655;3657658;3659303;3663108	+;+;+;+	872	0	0.44078	0.0748186	0.380899	0	0.0690414	0	0.147609	0	0.112284	0.174179	0.482134	0.55137
2210417A02Rik	5;5	148741840;148742735	148741984;148743139	+;+	550	0.376398	0.299501	0.237243	0.503249	0.0948161	0.328386	0.518814	0.117013	0	0	0.184102	0	0.764901
2210418O10Rik	2;2;2;2;2;2;2;2;2;2;2;2;2;2;2	176226569;176226573;176230125;176230125;176230177;176231481;176235319;176235319;176235319;176235651;176235651;176235651;176236860;176236867;176236867	176226686;176226686;176230179;176230179;176230179;176231582;176235445;176235445;176235445;176235715;176235711;176235711;176237609;176240328;176238721	+;+;+;+;+;+;+;+;+;+;+;+;+;+;+	3936	0.385706	0.432042	0.485501	0.280303	0.267236	0.37597	0.341642	0.147159	0.171989	0.22239	0.228573	0.252692	0.282479
2210420H20Rik	18;18;18;18	82754505;82754658;82754984;82758814	82754568;82754888;82755089;82759041	-;-;-;-	629	0	0	0	0	0	0	0	0	0	0	0	0	0
2300002M23Rik	17;17;17	35567450;35567485;35567834	35567620;35568930;35568952	+;+;+	1503	0	0	0.0868155	0	0	0.120168	0	0	0	0	0	0.0399601	0.0799725
2300003K06Rik	11	99836802	99838066	-	1265	0	0	0	0	0	0	0	0	0	0	0	0	0
2300009A05Rik	9;9;9;9;9;9;9	63394447;63394447;63394448;63397476;63398512;63398544;63398876	63394675;63394675;63394675;63399246;63398827;63398827;63399241	-;-;-;-;-;-;-	2000	1.27662	1.78453	1.43532	0.747324	0.912605	1.80612	2.14011	0.74011	0.825548	1.07702	1.13913	1.08108	1.23204
2310001H17Rik	6;6;6;6;6;6;6;6;6;6;6;6;6;6;6;6;6;6;6;6	129208412;129212736;129216302;129216351;129227628;129232623;129232683;129232788;129233064;129233064;129233064;129233064;129233064;129233885;129233896;129237739;129237739;129237739;129237739;129238436	129210203;129216536;129216536;129216536;129227774;129232947;129232947;129232947;129233153;129233153;129233153;129233153;129233153;129233974;129233983;129237857;129238725;129237991;129237948;129238482	-;-;-;-;-;-;-;-;-;-;-;-;-;-;-;-;-;-;-;-	7241	1.50573	2.31282	1.82904	2.17118	1.99492	2.29891	1.51718	3.60405	4.06836	3.20466	3.16033	5.09279	3.56064
2310001K20Rik	7	76611065	76612015	+	951	0	0	0	0	0	0	0	0	0	0	0	0	0.063196
2310001K24Rik	2;2;2	163471957;163472278;163472545	163471968;163473005;163473003	+;+;+	740	2.33129	2.81963	3.43842	1.87018	2.11414	2.19664	2.98844	1.65242	0.822025	1.58775	2.32616	1.94789	1.54309
2310002F09Rik	7;7;7;7;7;7;7;7;7;7;7;7	43695209;43703030;43703650;43745466;43748651;43748651;43756027;43757980;43758439;43796824;43797420;43797420	43695495;43703128;43703853;43747790;43748793;43748790;43756231;43758584;43758584;43796908;43797958;43797945	-;-;-;-;-;-;-;-;-;-;-;-	4492	0.215069	0.476722	0.319528	0.0369706	0.139311	0.281453	0.269975	0.157598	0.154764	0.174374	0.14652	0.106964	0.0133792
2310002L09Rik	4;4;4;4;4;4;4	73939371;73939371;73941579;73941602;73942779;73950573;73950573	73939598;73939598;73943234;73941801;73943234;73950846;73950845	-;-;-;-;-;-;-	2158	0	0	0	0	0	0.111592	0.0991709	0	0	0.0907426	0	0	0
2310003L06Rik	5;5;5	87969459;87970639;87971440	87969556;87970712;87972870	+;+;+	1603	0	0	0	0	0	0	0	0	0	0	0	0	0
2310005A03Rik	2;2;2	155097789;155099111;155100028	155099007;155099235;155100081	-;-;-	1398	0	0	0	0	0	0	0	0	0	0	0	0	0
2310005E17Rik	13;13;13	98424109;98429050;98434862	98424916;98429224;98435065	-;-;-	1187	0	0	0	0	0	0	0	0	0	0	0	0	0
2310007B03Rik	1;1;1;1;1;1;1;1;1;1;1;1	93151349;93151583;93152917;93152917;93154487;93154487;93155979;93155979;93159601;93159601;93160802;93160889	93152100;93152100;93153273;93153273;93154640;93154640;93156204;93156204;93160350;93160350;93160870;93160948	-;-;-;-;-;-;-;-;-;-;-;-	2368	13.6672	9.92435	8.40319	9.3509	5.57165	7.77975	6.86859	8.23492	5.24775	5.99541	12.5715	11.0837	18.7557
2310008N11Rik	8;8;8;8;8;8;8;8;8;8;8;8;8;8;8	26814593;26814593;26815163;26815163;26824214;26826490;26826808;26841479;26841479;26841911;26880340;26880340;26880491;26882489;26884051	26814807;26814807;26815305;26815305;26824423;26826708;26826898;26841536;26841536;26841999;26880582;26880582;26880582;26882695;26884380	-;-;-;-;-;-;-;-;-;-;-;-;-;-;-	1805	0	0	0	0	0	0	0.0790437	0.0713101	0.0481439	0.0542444	0.0841465	0.0332743	0
2310009A05Rik	9;9;9	73039718;73039730;73042432	73039865;73042368;73042779	+;+;+	2999	1.35758	1.94075	2.11019	1.31056	1.3911	2.40897	2.11703	0.53649	1.15905	0.979439	1.73881	1.6472	1.98394
2310009B15Rik	1;1;1;1;1;1;1;1	138851983;138851984;138852033;138853571;138853571;138853571;138856074;138856581	138852173;138852173;138852173;138854350;138853672;138853672;138856847;138856852	-;-;-;-;-;-;-;-	1750	1.30126	1.00404	0.894745	0.964799	0.864181	1.06647	0.733751	0.717125	1.19177	0.951138	0.983633	1.26984	0.927247
2310010J17Rik	7;7;7;7;7;7;7;7;7	90124822;90124831;90124831;90126928;90126928;90127597;90129376;90129872;90129872	90125032;90125032;90125032;90127044;90127044;90127656;90129477;90129984;90129940	-;-;-;-;-;-;-;-;-	603	2.51764	2.7773	3.13767	1.56065	1.4702	2.69571	1.77455	2.66822	2.16169	3.0851	1.34337	2.19125	2.19268
2310011J03Rik	10;10	80318254;80320183	80319547;80320537	-;-	1649	9.12272	7.92495	10.5242	9.76894	9.7878	8.21463	8.30606	8.62522	7.64127	6.94701	11.2064	13.0755	9.69462
2310014F06Rik	7;7;7;7;7;7;7;7	112612560;112618629;112665560;112667852;112677849;112677849;112679917;112679917	112613767;112618667;112666730;112667900;112678026;112678026;112680081;112680058	-;-;-;-;-;-;-;-	2810	1.76813	1.71956	1.30019	0.827405	0.519633	1.04982	0.913925	0.939022	0.804055	0.871096	0.432411	0.427474	0.406366
2310015A10Rik	12;12;12	80120548;80131814;80132727	80125126;80131959;80132844	-;-;-	4843	4.3031	4.20629	3.5295	2.81759	3.18191	4.63682	3.4468	5.14274	8.6487	6.50989	6.19915	7.70128	5.38574
2310015D24Rik	16;16;16;16;16;16;16	13514131;13519185;13519193;13519648;13519648;13520328;13520990	13516487;13519522;13519522;13519775;13519777;13520419;13521107	-;-;-;-;-;-;-	3035	0.0227368	0.0361836	0.0214965	0.0182397	0	0	0	0.0212051	0.0572651	0.129043	0	0.0197892	0
2310015K22Rik	1;1	80225044;80227460	80225171;80228792	+;+	1461	0	0	0	0	0	0.0412075	0	0	0	0	0	0	0
2310016D03Rik	12;12;12	30410559;30428312;30467284	30411950;30428391;30467358	-;-;-	1547	0	0	0	0	0	0	0	0	0	0	0	0	0
2310016D23Rik	1;1;1;1	60778843;60797944;60801240;60803622	60778916;60798027;60801300;60803790	+;+;+;+	388	0	0	0	0.142674	0	0	0	0.16587	0	0	0.130485	0.154794	0
2310016G11Rik	7;7;7;7;7;7;7	44668233;44669199;44669663;44670434;44676854;44677752;44677752	44668357;44669302;44669833;44670599;44677361;44677918;44678235	+;+;+;+;+;+;+	1558	12.8446	9.62133	10.3642	4.44138	3.46432	6.00882	7.25732	5.61785	1.78485	1.00551	2.92461	2.92976	3.85747
2310020H05Rik	13;13;13;13;13;13	99076526;99078709;99078933;99083644;99083828;99087854	99076800;99078850;99079038;99083675;99083924;99087921	-;-;-;-;-;-	720	0	0	0	0	0	0	0	0	0	0	0	0	0.166943
2310022A10Rik	7;7;7;7;7;7;7;7;7;7;7;7;7;7;7;7;7;7;7;7;7;7;7;7;7;7;7;7;7;7;7;7;7;7;7;7;7;7;7;7;7;7;7;7;7;7;7;7;7;7;7;7;7	27553233;27553267;27553270;27553286;27553730;27556414;27556414;27560476;27560497;27560552;27560552;27560552;27564486;27564486;27564486;27564486;27564486;27564660;27564660;27564660;27564660;27564660;27565647;27565647;27565647;27565647;27565647;27565658;27571564;27571564;27571564;27571564;27571564;27571564;27574467;27574591;27574591;27574591;27574591;27574591;27574591;27578713;27578713;27578713;275…	27553353;27553353;27553353;27553353;27554071;27556534;27556534;27560603;27560603;27560603;27560603;27560603;27564573;27564573;27564573;27564573;27564573;27564774;27564774;27564774;27564774;27564774;27565728;27565728;27565728;27565728;27565728;27565728;27573327;27571748;27571701;27571701;27571701;27571701;27574501;27574740;27574740;27574740;27574740;27574718;27574740;27578783;27578783;27578783;275…	+;+;+;+;+;+;+;+;+;+;+;+;+;+;+;+;+;+;+;+;+;+;+;+;+;+;+;+;+;+;+;+;+;+;+;+;+;+;+;+;+;+;+;+;+;+;+;+;+;+;+;+;+	4780	1.81899	1.92984	2.37491	3.64803	3.81843	2.56938	1.82073	1.89841	1.49984	1.55675	2.58437	2.72658	2.71579
2310022B05Rik	8;8;8;8	124635756;124639091;124651371;124662848	124637964;124639615;124651421;124663369	-;-;-;-	3307	14.0433	12.403	12.7544	8.06841	7.15923	12.1246	12.2526	8.93258	6.01755	4.0858	7.34851	6.04778	7.34204
2310026I22Rik	18;18;18	32915826;32923871;32938911	32916730;32923953;32939222	-;-;-	1300	0	0	0	0	0	0.0926217	0	0	0.066846	0	0	0	0
2310026L22Rik	4;4	138215714;138215916	138215839;138216189	+;+	400	2.2427	1.57862	1.95726	0.83036	0.912605	1.95663	1.96177	1.52849	0.651748	1.22389	2.46812	1.5015	2.25373
2310030A07Rik	1;1;1;1	150320681;150322643;150344897;150346662	150320920;150322830;150344968;150346771	-;-;-;-	610	0	0	0	0	0	0	0	0	0.284917	0	0	0	0.0985235
2310030G06Rik	9;9;9;9;9	50739691;50741296;50742261;50745720;50746442	50740749;50741360;50742298;50746511;50746536	-;-;-;-;-	1979	6.99129	7.69941	6.29671	4.61544	3.10943	6.11472	5.65937	4.39022	3.77634	2.67166	6.47242	4.27917	4.73749
2310031A07Rik	11;11	46440362;46447069	46441171;46447248	-;-	990	6.83092	6.26734	7.6445	9.22622	10.4824	9.24346	12.0336	13.9116	14.22	13.3515	12.6826	13.7107	14.7517
2310033P09Rik	11;11;11;11;11;11;11	59208321;59208820;59208969;59209128;59209308;59209973;59210227	59208673;59208865;59209051;59209200;59209393;59210104;59210738	+;+;+;+;+;+;+	1285	7.27654	7.60601	6.65111	5.60035	7.75131	7.58993	7.88315	4.40735	3.92232	3.3526	6.75699	7.2446	5.93978
2310034C09Rik	16	88758847	88759792	+	946	0	0	0	0	0	0	0	0	0	0	0	0	0
2310034G01Rik	19;19;19;19	46348201;46348899;46350196;46350200	46349466;46349466;46350302;46350302	-;-;-;-	1373	2.01038	3.31931	1.6156	2.13688	2.2789	2.89401	1.03914	1.21871	5.50639	5.4197	3.2818	3.19329	2.45125
2310034O05Rik	5;5;5;5;5;5;5	100210692;100210708;100215806;100215806;100216614;100216614;100217447	100211027;100211027;100215865;100215865;100216741;100216721;100218049	+;+;+;+;+;+;+	1127	0.06123	0.048721	0	0	0	0	0	0.22842	0	0	0.044923	0	0
2310035C23Rik	1;1;1;1;1;1;1;1;1;1;1;1;1;1;1;1;1;1;1;1;1;1;1;1;1;1;1;1;1;1;1;1;1;1;1;1;1;1;1;1;1;1;1;1;1;1;1;1;1;1;1;1;1;1;1;1;1;1;1;1;1;1;1;1;1;1;1;1;1;1;1;1;1;1;1;1;1;1;1;1;1;1;1;1;1;1;1;1;1;1;1;1;1;1;1;1;1;1;1;1;1;1;1;1;1;1;1;1;1;1;1;1;1;1;1;1;1;1;1;1;1;1;1;1;1;1;1;1;1;1;1;1;1;1;1;1;1;1;1;1;1;1;1;1;1;1;1;1;1;1;1;1;1;1;1;1;1;1;1;1;1;1;1;1;1;1;1;1;1;1;1;1;1;1;1;1;1;1;1;1;1;1	105663861;105663861;105663883;105663913;105663923;105663937;105664441;105664974;105678163;105678163;105678163;105678163;105678163;105678163;105681039;105686949;105686949;105686949;105686949;105686949;105687130;105687130;105687130;105687130;105687130;105687130;105687282;105687282;105687282;105687282;105687282;105691906;105691906;105691906;105691906;105691906;105692212;105692212;105692212;105692212…	105664633;105663983;105664633;105664633;105664633;105664633;105664633;105665150;105678252;105678252;105678252;105678252;105678252;105678252;105681095;105687020;105687020;105687020;105687020;105687020;105687185;105687185;105687185;105687185;105687185;105687141;105687395;105687395;105687395;105687395;105687395;105692109;105692109;105692109;105692109;105692109;105692303;105692303;105692303;105692303…	+;+;+;+;+;+;+;+;+;+;+;+;+;+;+;+;+;+;+;+;+;+;+;+;+;+;+;+;+;+;+;+;+;+;+;+;+;+;+;+;+;+;+;+;+;+;+;+;+;+;+;+;+;+;+;+;+;+;+;+;+;+;+;+;+;+;+;+;+;+;+;+;+;+;+;+;+;+;+;+;+;+;+;+;+;+;+;+;+;+;+;+;+;+;+;+;+;+;+;+;+;+;+;+;+;+;+;+;+;+;+;+;+;+;+;+;+;+;+;+;+;+;+;+;+;+;+;+	9500	6.65366	6.89536	6.52419	6.97211	6.19748	8.64087	8.01977	9.38263	9.18393	10.2343	7.86069	7.30836	8.33167
2310036O22Rik	8;8;8	85026823;85029539;85029875	85027234;85029616;85030286	+;+;+	902	37.7928	44.8034	41.0112	43.083	39.7765	33.4393	32.9004	33.356	30.4438	28.2227	49.3372	57.8628	41.6431
2310039H08Rik	17	46772635	46773407	+	773	3.6601	4.54612	4.38884	3.6523	2.93464	4.51725	2.39943	5.41168	4.60917	3.92658	7.46651	4.04026	3.34317
2310039L15Rik	10;10;10	95336276;95358267;95362947	95336555;95358358;95363216	+;+;+	642	0.107486	0.598692	0.609737	0.172453	0	0	0.888934	0.300735	0.270716	0.305019	0.31544	0.0935515	0.0936127
2310040G07Rik	5;5;5	76928368;76928608;76947446	76928845;76928756;76947758	+;+;+	791	2.79166	2.46429	2.14449	0.839808	1.1867	2.81612	2.34483	1.62724	1.53805	2.47563	1.66414	0.759293	1.06371
2310040G24Rik	6;6;6;6	86483376;86483376;86487795;86488002	86483699;86483717;86488227;86488204	-;-;-;-	775	0.801363	0.425099	0.84183	1.07143	0.807466	0.699144	0.644334	0.166084	0.336386	0	0.78392	0.697472	0.853023
2310043L19Rik	1;1;1	177641542;177642010;177642707	177641897;177642114;177642943	-;-;-	698	0	0.0786656	0	0.396543	0.224136	0	0.102202	0.461013	0.497993	0.70137	0	0.258138	0.430511
2310043M15Rik	16;16	93792150;93794569	93793382;93794888	-;-	1553	5.1988	5.1974	4.01197	3.86753	4.19743	4.71011	4.08821	3.23237	4.14075	3.90888	4.33583	5.00823	3.61835
2310043O21Rik	15;15;15	38549344;38587028;38594808	38549550;38587314;38594934	-;-;-	621	0	0.176839	0.105059	0.178285	0	0	0	0	0.139935	0	0.163054	0	0
2310043P16Rik	7	34389732	34393612	+	3881	0.746783	0.735698	0.563154	0.841557	0.792781	0.760114	0.772005	5.62153	7.05319	4.8943	2.29594	2.33679	1.57952
2310044K18Rik	7;7	83659575;83660487	83659715;83660963	+;+	618	1.00495	1.42158	1.3724	1.34362	1.5189	1.6561	3.46296	2.60345	1.68737	3.01022	1.8023	2.5268	1.75047
2310046K23Rik	3;3	92532505;92534474	92533143;92534511	-;-	677	0	0	0	0	0	0	0.105372	0	0	0	0	0	0
2310047D07Rik	5;5;5;5;5	149231332;149237154;149237239;149237534;149237537	149231429;149237427;149237427;149237966;149237984	+;+;+;+;+	823	0.503083	0.533741	0.0792732	0.134526	0.570279	0.292608	0.0866791	0.156397	0.211178	0	0.430616	1.39897	0.438148
2310050C09Rik	3;3	92868359;92870176	92869395;92870216	-;-	1078	0	0	0	0	0	0	0	0	0	0	0	0	0
2310057J18Rik	10;10;10;10;10;10;10;10;10;10;10;10;10;10;10;10;10;10;10;10	28972288;28972364;28972366;28972366;28973850;28973850;28973850;28973850;28981486;28981486;28981486;28982421;28982421;28982421;28983928;28983928;28983928;28984944;28985992;28985992	28972679;28972679;28972679;28972679;28974088;28974189;28974088;28973901;28981586;28981586;28981586;28982605;28982605;28982605;28984014;28984014;28984014;28985384;28986303;28986293	-;-;-;-;-;-;-;-;-;-;-;-;-;-;-;-;-;-;-;-	1858	0	0	0	0	0	0	0	0	0	0	0	0	0
2310057M21Rik	7;7;7;7;7;7;7;7;7;7;7;7;7;7;7;7;7;7;7;7;7;7;7;7	131338220;131343186;131343511;131348692;131350651;131350651;131350929;131357460;131357460;131357460;131360889;131360889;131360889;131360927;131361733;131361733;131361733;131361733;131361783;131362209;131362374;131362508;131362508;131362508	131343804;131343804;131343804;131351102;131355742;131351102;131351102;131357666;131357666;131357666;131360961;131360961;131360961;131360961;131361936;131361936;131361936;131361936;131361932;131362387;131362454;131362710;131362696;131362759	-;-;-;-;-;-;-;-;-;-;-;-;-;-;-;-;-;-;-;-;-;-;-;-	13618	1.25415	1.18139	1.12585	1.04471	0.908833	1.38154	1.1996	1.14131	1.26349	1.67523	1.24358	1.0673	1.23129
2310057N15Rik	16	88773179	88774206	-	1028	0	0	0	0	0	0	0	0	0	0	0	0	0
2310058D17Rik	11;11	58965748;58977682	58968579;58978050	-;-	3201	1.121	1.37229	1.26367	0.91657	1.56398	1.56106	1.13658	0.663478	0.678692	0.428228	0.759185	1.44474	1.80242
2310061I04Rik	17;17;17;17;17;17;17;17;17;17;17;17;17;17;17;17;17;17;17;17;17;17;17;17;17;17;17;17;17;17;17;17;17;17;17;17	35892677;35892677;35892683;35892687;35892831;35893040;35893040;35893040;35893040;35894919;35894919;35894919;35894919;35894919;35895044;35895284;35895284;35895284;35895284;35895284;35895284;35895671;35895671;35895671;35895671;35895671;35895771;35895920;35896260;35896260;35896273;35896980;35897045;35897045;35897191;35897191	35892966;35892966;35893109;35892966;35892989;35893109;35893109;35893109;35893109;35895119;35895119;35895119;35895119;35895119;35895119;35895372;35895372;35895372;35895313;35895372;35895372;35895920;35896072;35897111;35896072;35896072;35896072;35896072;35896608;35896445;35896445;35897120;35897103;35897073;35897312;35897431	-;-;-;-;-;-;-;-;-;-;-;-;-;-;-;-;-;-;-;-;-;-;-;-;-;-;-;-;-;-;-;-;-;-;-;-	2414	4.54515	4.89037	4.5945	4.81568	4.36374	4.80087	4.93507	1.66625	2.23189	2.69722	3.83801	4.60278	5.1784
2310061N02Rik	16	88707169	88707962	-	794	0	0	0	0	0	0	0	0	0	0	0	0	0
2310065F04Rik	11;11;11;11;11;11;11;11;11	67112461;67114009;67114654;67114781;67116112;67116112;67116650;67119757;67120047	67114117;67114117;67115139;67115139;67116500;67116500;67116841;67119914;67120080	-;-;-;-;-;-;-;-;-	2916	0	0	0	0	0	0	0	0	0	0	0	0	0
2310068J16Rik	15	99972164	99973287	-	1124	3.43803	1.80749	2.03155	2.85652	2.69096	1.66043	2.09441	2.92013	2.31939	2.26485	3.64847	2.72515	2.7804
2310069B03Rik	6;6;6;6;6;6;6;6;6;6;6;6	82877864;82878527;82879421;82880395;82880395;82880395;82881237;82881237;82881237;82881724;82881769;82881769	82879476;82879476;82879476;82880456;82880456;82880456;82881333;82881333;82881309;82881832;82881853;82881853	-;-;-;-;-;-;-;-;-;-;-;-	1902	0.0362809	0	0	0.0291048	0	0.031653	0	0.10151	0.365509	0.51478	0.186329	0.0631547	0.063196
2310069G16Rik	15;15;15	44787782;44788485;44805235	44787890;44788623;44805827	+;+;+	841	0.246158	0.0652896	0	0.0658232	0.124016	0.0715863	0.0848239	0	0.103329	0	0.1204	0	0
2310074N15Rik	5	24447908	24448489	+	582	0	0.0943446	0.112099	0.0951157	0.179206	0.31033	0.122572	0	0	0	0	0.103196	0.103264
2310075C17Rik	9;9	112227579;112228010	112227671;112228242	+;+	326	0	0	0	0	0	0	0	0	0	0	0	0	0.184354
2310079G19Rik	16	88626786	88627666	-	881	0	0	0	0	0	0	0	0	0	0	0	0	0
2310081O03Rik	4;4	56220617;56223963	56220816;56224521	-;-	759	0	0.0723433	0.0859576	0.145869	0	0	0	0.0847923	0.343477	0.129	0.0667038	0	0
2410002F23Rik	7;7;7;7;7;7;7;7;7;7;7;7;7;7;7;7;7;7;7;7;7;7;7;7;7;7;7;7;7;7;7;7;7;7;7;7;7;7;7;7;7;7;7;7;7;7;7;7;7;7;7;7;7;7;7;7;7;7;7;7;7;7;7;7;7;7;7;7;7;7;7;7;7;7;7;7;7;7;7;7;7;7;7;7;7;7;7;7;7;7;7;7;7;7;7;7;7;7;7;7	44246722;44246728;44246735;44246754;44246787;44246787;44246787;44246787;44246789;44246791;44246797;44246799;44246800;44246808;44246818;44247231;44247238;44247238;44247238;44247238;44247251;44247251;44247251;44247442;44247910;44247910;44247910;44248252;44248252;44248252;44248252;44248252;44248252;44248252;44248252;44248252;44248252;44248252;44248252;44249542;44249542;44249542;44249542;44249542;442…	44246823;44246808;44246808;44246808;44248295;44246823;44248752;44246823;44248295;44246823;44246823;44246808;44247416;44246823;44246823;44247416;44247416;44248166;44247416;44247416;44248295;44247416;44247416;44249599;44248059;44248059;44248059;44248295;44248295;44248295;44248295;44248295;44248295;44248295;44248295;44248295;44248295;44248295;44248295;44249599;44249599;44249599;44249599;44249599;442…	+;+;+;+;+;+;+;+;+;+;+;+;+;+;+;+;+;+;+;+;+;+;+;+;+;+;+;+;+;+;+;+;+;+;+;+;+;+;+;+;+;+;+;+;+;+;+;+;+;+;+;+;+;+;+;+;+;+;+;+;+;+;+;+;+;+;+;+;+;+;+;+;+;+;+;+;+;+;+;+;+;+;+;+;+;+;+;+;+;+;+;+;+;+;+;+;+;+;+;+	5233	2.61757	2.91877	2.85715	2.11919	2.43484	3.53965	2.66276	3.53172	3.94677	4.66823	5.07607	4.07727	3.09512
2410003L11Rik	11;11;11;11;11;11	97598511;97614924;97614982;97618437;97618437;97622607	97598667;97615028;97615028;97618499;97619031;97622893	+;+;+;+;+;+	1144	0.241281	0.143991	0.0570296	0	0.136754	0.052626	0.24943	0	0	0.0855867	0	0.0525001	0.315206
2410004B18Rik	3;3;3;3;3;3;3;3;3;3;3;3;3;3;3;3;3;3;3;3;3	145938014;145938042;145938190;145938236;145938285;145938543;145938543;145938543;145938644;145938898;145938898;145938898;145938898;145939086;145941195;145943762;145943762;145943762;145943762;145943797;145943797	145938328;145938328;145938328;145938328;145938328;145938669;145938669;145938787;145939096;145939096;145939096;145939096;145939096;145939096;145941286;145944242;145943853;145944198;145943810;145944827;145944829	+;+;+;+;+;+;+;+;+;+;+;+;+;+;+;+;+;+;+;+;+	2029	4.69338	4.87114	5.36983	4.20159	4.90904	4.4211	5.80118	5.04328	3.51197	4.0535	4.21693	3.90731	5.59822
2410004I01Rik	11;11;11	102958300;102961809;102964021	102958899;102962028;102964387	-;-;-	1187	2.96489	2.72924	5.16658	3.82418	3.25107	1.67374	2.10345	3.57842	1.46419	1.31978	3.07096	2.8841	1.11389
2410004P03Rik	12;12;12;12;12;12;12;12;12;12;12;12	17003319;17005590;17007020;17007020;17007140;17008273;17008273;17011128;17011128;17011128;17011452;17011452	17005998;17005998;17007236;17007236;17007236;17008312;17008312;17011503;17011351;17011351;17011727;17011554	-;-;-;-;-;-;-;-;-;-;-;-	3537	2.86794	6.11648	1.89989	2.37894	1.04681	3.13191	1.00844	0.618646	3.16937	3.21111	2.76258	2.64896	0.441782
2410006H16Rik	11;11;11;11;11	62602877;62603235;62603597;62604403;62604655	62603023;62603282;62603646;62604466;62604807	+;+;+;+;+	462	32.2627	29.4153	39.9642	34.2089	31.7747	40.4618	39.1427	37.0543	28.1202	34.2265	37.6424	39.5201	29.4643
2410012E07Rik	14;14;14;14	70852933;70855781;70872255;70872942	70852995;70855909;70872406;70873954	+;+;+;+	1357	0	0	0	0	0	0	0	0	0	0	0	0	0
2410015M20Rik	17;17;17;17	56607452;56608638;56608846;56609640	56607841;56608692;56609023;56609771	-;-;-;-	755	15.0808	17.818	14.863	14.3709	16.9225	12.8781	13.1336	12.36	7.36634	6.61387	13.4785	14.319	13.0149
2410016O06Rik	12	83950608	83952953	+	2346	4.08861	6.7524	4.65815	6.58342	5.80173	4.8502	5.74709	2.16719	3.03742	2.62933	4.55351	4.45458	4.22694
2410017I17Rik	17;17;17;17;17;17;17;17;17;17;17;17;17;17;17	36145018;36145018;36154847;36155032;36155299;36155299;36155299;36161025;36161025;36161025;36161237;36161237;36161237;36161626;36162059	36145202;36145202;36154943;36155139;36155364;36155364;36155364;36161146;36161146;36161146;36162375;36161345;36162056;36163176;36162374	+;+;+;+;+;+;+;+;+;+;+;+;+;+;+	2518	0.068513	0.109032	0.207282	0.0879386	0.0724865	0.143457	0.0566616	0.881783	0.345114	0.291634	0.392077	0.0954092	0.0716037
2410018L13Rik	12;12;12;12;12;12;12;12;12;12;12;12;12;12;12;12;12;12;12;12	22953997;22953999;22958352;22958352;22959677;22982386;22983061;22992324;22992788;22992788;22992788;22992788;22993051;22993051;22993051;23009845;23009845;23009845;23009845;23009845	22954837;22954837;22960254;22958457;22960254;22982546;22983185;22992848;22992848;22992848;22992848;22992848;22993177;22993177;22993177;23009998;23010225;23010243;23010284;23010209	-;-;-;-;-;-;-;-;-;-;-;-;-;-;-;-;-;-;-;-	4122	0.212108	0.084321	0.10288	0.141012	0.0948851	0.0292111	0.19037	0.132712	0.0895982	0.0515447	0.153039	0.116565	0.0801908
2410021H03Rik	17;17;17	69275362;69276126;69277060	69275906;69276195;69277208	-;-;-	764	0.0903223	0.359349	0.939346	0.362286	0.136515	0.236404	0.466865	0.168475	0.227486	0.128156	0.265069	0.157225	0.471984
2410022M11Rik	14	56811953	56815597	+	3645	0.624748	0.768268	0.680162	0.303744	0.443516	0.561575	0.587135	1.09469	1.07284	1.04761	1.23619	0.69205	0.313275
2410024N13Rik	3;3;3;3;3	103198226;103198291;103198320;103198340;103198818	103198288;103198317;103198337;103198742;103198975	-;-;-;-;-	669	0	0	0	0	0	0	0	0	0	0	0	0	0
2410080I02Rik	19;19	23134900;23135359	23134954;23135717	+;+	414	1.00009	1.19366	0.157589	0	0.125963	0.727103	0.689246	0.155453	0.209903	0.709502	0.12229	0.435218	0
2410089E03Rik	15;15;15;15;15;15;15;15;15;15;15;15;15;15;15;15;15;15;15;15;15;15;15;15;15;15;15;15;15;15;15;15;15;15;15;15;15;15;15;15;15;15;15;15;15;15;15;15;15;15;15;15;15;15;15;15;15;15;15;15;15;15;15	8169106;8170306;8171693;8174726;8174957;8176119;8178337;8179758;8180879;8182116;8186083;8186211;8186499;8186824;8186824;8188387;8188797;8194301;8194324;8199181;8199181;8201134;8201134;8202194;8202194;8203261;8203673;8209962;8212369;8212629;8213707;8215969;8216308;8218423;8218423;8220858;8221783;8222337;8223071;8226913;8227286;8228590;8230215;8231112;8232046;8233764;8242270;8243803;8244221;8244609…	8169489;8170394;8171821;8174861;8175076;8176351;8178443;8179914;8180982;8182298;8186332;8186651;8186651;8187065;8187578;8188595;8188877;8194488;8194488;8199339;8199339;8201362;8201362;8202606;8202333;8203478;8203837;8210100;8212478;8212787;8213815;8216599;8216599;8218631;8219395;8220967;8221949;8222407;8223150;8227093;8227567;8229330;8230369;8231241;8232100;8233868;8242341;8243912;8244413;8244761…	+;+;+;+;+;+;+;+;+;+;+;+;+;+;+;+;+;+;+;+;+;+;+;+;+;+;+;+;+;+;+;+;+;+;+;+;+;+;+;+;+;+;+;+;+;+;+;+;+;+;+;+;+;+;+;+;+;+;+;+;+;+;+	13017	5.27208	5.80005	4.68627	4.13362	4.1885	6.32936	4.91034	3.0604	5.25057	7.34127	4.05663	4.31868	4.76473
2410124H12Rik	16;16;16	92478742;92492014;92497050	92478968;92492175;92497366	+;+;+	706	0	0	0	0	0	0	0	0	0	0	0	0	0
2410131K14Rik	5;5;5;5;5	118245227;118255670;118258976;118259375;118261100	118245458;118255826;118259127;118259488;118266093	+;+;+;+;+	5649	2.44313	2.74105	2.56394	2.09709	2.1094	2.98409	2.36148	2.28993	2.13827	1.99324	2.5453	2.37093	2.07991
2410137M14Rik	17;17;17;17;17;17;17;17	36977701;36977838;36978453;36978469;36978651;36978651;36981140;36981140	36978106;36978106;36978546;36978546;36978933;36978933;36981237;36981217	-;-;-;-;-;-;-;-	881	0.234982	0.280464	0	0	0.0591928	0.136672	0.242918	0.0730504	0.0986376	0	0.0574667	0.0681726	0.0341086
2410141K09Rik	13;13;13;13;13;13;13;13;13;13;13;13;13;13;13;13	66418114;66418245;66418327;66418762;66418762;66419571;66429720;66433418;66433418;66433418;66433679;66433679;66433679;66433893;66441020;66441020	66418282;66418282;66418820;66418820;66418820;66419597;66432231;66433478;66433478;66433478;66433805;66433805;66433805;66433895;66441078;66441118	-;-;-;-;-;-;-;-;-;-;-;-;-;-;-;-	3492	0	0	0	0	0	0	0	0	0	0	0	0	0
2410152P15Rik	19;19	6617671;6674271	6618263;6674548	-;-	871	0	0	0	0	0	0	0	0	0	0	0	0	0
2500002B13Rik	8;8;8;8;8	57488054;57490340;57505815;57506528;57506528	57488193;57490467;57505908;57508877;57506731	+;+;+;+;+	2712	0.661564	0.647889	0.44505	0.224532	0.461494	0.554979	0.420867	0.142384	0.096128	0.144412	0.317359	0.420775	0.531853
2500004C02Rik	2;2;2;2;2;2	153341157;153342515;153342635;153343170;153345621;153345877	153342864;153342864;153342864;153343221;153345810;153346073	-;-;-;-;-;-	2147	2.98909	3.05616	2.9172	1.55991	1.3359	3.19668	2.55843	1.25897	1.63924	1.45932	2.00438	2.12602	1.76351
2510002D24Rik	16;16;16;16;16;16;16;16;16;16	18836578;18836581;18836581;18836655;18836706;18836706;18837234;18839090;18839090;18839090	18836619;18836619;18836619;18836873;18836873;18836873;18837387;18839800;18840045;18840160	+;+;+;+;+;+;+;+;+;+	1486	5.22423	5.37003	4.71972	2.77532	2.21966	5.97584	3.36042	1.88395	1.57893	2.37201	2.94706	3.5163	2.68951
2510009E07Rik	16;16	21649045;21694216	21653758;21694665	-;-	5164	11.9331	12.1535	12.3497	8.42581	7.40223	12.6144	12.5986	4.21862	3.50022	4.45568	6.63245	6.99286	8.47257
2510016D11Rik	5	120552055	120553039	-	985	1.33109	2.1183	2.252	1.57361	1.53535	2.56708	1.95543	0.849387	0.794008	0.497011	0.873786	1.21949	0.976233
2510017J16Rik	5	3585112	3586374	+	1263	2.13083	2.39111	2.42784	0.964261	1.07353	2.52638	2.59818	1.85989	2.47695	2.24816	2.44522	2.13991	2.28406
2510039O18Rik	4;4;4	147940895;147944608;147946601	147942057;147945461;147947314	+;+;+	2731	11.6232	11.028	11.7297	15.7498	13.8726	12.8521	10.9709	12.0184	11.3278	12.584	14.3116	14.4707	15.1184
2510046G10Rik	7;7	126648543;126649223	126649594;126649570	-;-	1052	2.95179	2.55753	3.10085	1.57863	2.32984	2.74695	2.98367	1.10117	1.40427	1.39607	2.74316	2.79748	1.1997
2600006K01Rik	2;2	29868723;29869560	29869370;29870317	-;-	1406	0.736198	0.546742	0.417622	0.787444	0.556353	0.385375	0.456637	1.28165	0.494451	0.76602	1.2603	0.469887	0.555684
2600014E21Rik	2;2;2;2;2;2;2;2;2;2;2	75138842;75139290;75248377;75275290;75301643;75302677;75304279;75305451;75311017;75312591;75315024	75139052;75139373;75248519;75275452;75301666;75302759;75304346;75305520;75311142;75314047;75322897	+;+;+;+;+;+;+;+;+;+;+	10303	0	0.0213175	0	0.00537293	0	0.0116867	0.0276956	0.0312324	0.0168688	0.0285095	0.00982785	0.0233175	0.00583319
2610001A08Rik	11	19005607	19006473	-	867	4.77552	3.22992	6.05763	2.04318	1.44357	4.72189	4.03173	0.89076	0.200461	0.451724	2.04381	2.97876	1.66365
2610001J05Rik	6;6;6;6;6;6;6;6;6	13867735;13869800;13869860;13870001;13871056;13871056;13871439;13871439;13871439	13870740;13870740;13871465;13870740;13871163;13871146;13871465;13871518;13871466	-;-;-;-;-;-;-;-;-	3784	5.50737	5.70271	6.1897	5.67618	5.01643	5.20263	5.60855	6.77759	4.93749	5.07151	6.58273	5.59492	5.73358
2610002M06Rik	X;X;X;X;X;X;X;X;X;X;X;X;X;X	107782751;107787837;107788266;107788266;107790736;107790736;107792899;107792899;107793093;107793093;107793508;107793508;107807792;107816135	107787853;107787853;107788338;107788338;107790779;107790779;107793006;107793006;107793161;107793161;107794149;107793654;107807889;107816334	-;-;-;-;-;-;-;-;-;-;-;-;-;-	6337	3.45195	3.88181	4.27258	3.82618	2.53461	4.18968	4.95317	2.22412	2.0981	2.44121	3.14778	3.03286	4.28671
2610005L07Rik	8;8;8;8;8;8;8;8;8;8;8	20385782;20395392;20399096;20399303;20401377;20401377;20405121;20405121;20410357;20410357;20424592	20388402;20395545;20399468;20399468;20401496;20401496;20405419;20405419;20410565;20410729;20424814	-;-;-;-;-;-;-;-;-;-;-	4163	9.25078	8.82679	7.71916	5.80301	6.40969	8.08366	7.14123	6.78729	7.79217	7.74799	7.12321	5.67851	4.09926
2610008E11Rik	10;10;10;10;10;10	79064374;79068634;79088287;79092412;79094431;79097458	79068051;79068728;79088379;79092504;79094557;79097600	-;-;-;-;-;-	4229	10.0026	9.03674	10.0354	4.80401	4.09398	11.4315	11.4537	5.60026	2.89734	5.23243	7.34761	6.83114	6.52296
2610011E03Rik	5	131996179	131998413	-	2235	0.741007	0.565055	0.817348	0.222915	0.186663	0.673424	0.67028	0.6047	0.194407	0.0876163	0.453048	0.134363	0.10756
2610012C04Rik	1	135480392	135481414	-	1023	1.28164	1.28818	1.33928	1.73161	1.37636	1.53011	1.67359	0.440373	0.679568	0.47855	0.395919	1.35032	0.64623
2610016A17Rik	19;19;19;19;19	25671134;25671172;25671565;25672078;25672078	25671445;25671541;25672253;25672222;25672239	-;-;-;-;-	1097	0.125809	0.0500534	0	0	0	0.0548807	0	0	0	0	0	0	0
2610020C07Rik	16;16	11203383;11223237	11203747;11225796	+;+	2925	4.18756	4.61795	4.03719	5.20454	4.48391	5.16623	5.73134	4.13647	4.4564	5.33909	5.67728	5.15387	4.81822
2610020F03Rik	16;16	21907922;21908721	21908452;21908777	-;-	588	0.821503	0.840437	0.554778	0.0941451	0.0886886	0.614328	0.606606	0.328354	0.295577	0.333031	0.774921	0.715001	0.10221
2610020H08Rik	7;7;7;7;7;7;7;7;7;7;7;7;7;7;7;7;7;7;7;7;7;7;7;7;7;7;7;7;7;7;7;7;7;7;7;7;7;7;7;7;7;7;7;7;7;7;7;7;7;7;7;7;7;7;7;7;7;7;7;7;7;7;7;7;7;7;7;7;7;7;7;7;7;7;7;7;7;7;7;7;7;7;7	119794006;119794010;119794119;119794130;119794151;119794358;119799565;119799565;119801230;119801230;119802741;119802741;119805143;119805143;119805143;119805143;119805143;119818383;119818383;119818383;119818383;119818383;119819432;119819432;119819432;119819432;119819432;119823756;119823756;119823756;119823756;119823876;119824045;119824045;119824045;119824045;119824100;119825536;119825536;119825536…	119794502;119794069;119794502;119794502;119794502;119794502;119799677;119799677;119801356;119801356;119802837;119802837;119805286;119805286;119805286;119805286;119805286;119818471;119818471;119818471;119818471;119818471;119820856;119819547;119819547;119819547;119819547;119823894;119823894;119823894;119823894;119823894;119824139;119824139;119824139;119824139;119824139;119825638;119825638;119825638…	+;+;+;+;+;+;+;+;+;+;+;+;+;+;+;+;+;+;+;+;+;+;+;+;+;+;+;+;+;+;+;+;+;+;+;+;+;+;+;+;+;+;+;+;+;+;+;+;+;+;+;+;+;+;+;+;+;+;+;+;+;+;+;+;+;+;+;+;+;+;+;+;+;+;+;+;+;+;+;+;+;+;+	4782	1.68836	1.79125	1.81455	2.28051	1.82118	2.48018	2.34209	3.71448	3.1438	3.03029	2.60975	1.60763	1.98572
2610021A01Rik	7;7;7;7;7;7;7;7;7;7;7;7;7;7;7;7;7;7;7;7;7;7	41599230;41599261;41599285;41599324;41601748;41602878;41603436;41603436;41603436;41611676;41611676;41611676;41611984;41612371;41612371;41613156;41613156;41613156;41624575;41624723;41625253;41625253	41599400;41599400;41599400;41599400;41601815;41602997;41603465;41603534;41603534;41611925;41611925;41611919;41612493;41612497;41612497;41613219;41613196;41613251;41624832;41624832;41625526;41628533	+;+;+;+;+;+;+;+;+;+;+;+;+;+;+;+;+;+;+;+;+;+	4857	3.67977	3.37455	3.29769	2.18831	1.88969	3.84875	3.65717	1.68281	1.72654	2.09651	2.74666	2.58443	2.45619
2610024D14Rik	11	21099534	21099827	+	294	5.86788	3.73528	4.66013	8.28477	6.91771	7.98626	6.30871	11.3829	11.5275	10.324	6.02716	8.17144	11.2431
2610027F03Rik	1;1;1;1;1;1;1	120621740;120663384;120678984;120679700;120688622;120689043;120690109	120621879;120663578;120679119;120679758;120688774;120689197;120690403	+;+;+;+;+;+;+	1133	0	0	0	0	0	0	0	0	0	0	0	0	0
2610027K06Rik	11;11;11;11;11;11;11;11;11;11;11;11	85791661;85795789;85795875;85796154;85801789;85801789;85801789;85804037;85805391;85805391;85832168;85832168	85793236;85796284;85796284;85796284;85801943;85801943;85801943;85804155;85805562;85805562;85832223;85832209	-;-;-;-;-;-;-;-;-;-;-;-	2574	3.49857	4.03175	2.76277	1.61298	2.43118	3.56687	3.4643	1.56268	0.641451	0.646655	1.59319	1.26	1.44761
2610028E06Rik	4;4;4;4;4;4;4;4;4;4;4;4;4;4;4;4;4;4;4;4;4;4;4;4;4;4	125887851;125887851;125888197;125890415;125891484;125891484;125891484;125891484;125893182;125893182;125893182;125893182;125893843;125893843;125893843;125893843;125898156;125898852;125916954;125918488;125918575;125921873;125921873;125922077;125922077;125922077	125890733;125890733;125890733;125890733;125891590;125891590;125891590;125891590;125893276;125893276;125893276;125893276;125893970;125893970;125893970;125893970;125898278;125898982;125917171;125918806;125918806;125921968;125921968;125922417;125922310;125922417	-;-;-;-;-;-;-;-;-;-;-;-;-;-;-;-;-;-;-;-;-;-;-;-;-;-	4441	0	0	0	0	0.0117426	0	0	0	0	0	0	0	0
2610028H24Rik	10;10;10;10;10;10;10;10;10;10;10;10;10;10;10;10	76449081;76450327;76450633;76450633;76451313;76451313;76452784;76452784;76454705;76454705;76457501;76457501;76457880;76457880;76460487;76460487	76449321;76450376;76450669;76450669;76451386;76451386;76452948;76452948;76454819;76454819;76457616;76457616;76458162;76458162;76461110;76461095	+;+;+;+;+;+;+;+;+;+;+;+;+;+;+;+	1705	34.8067	20.2888	14.3111	10.6494	9.17575	12.4292	8.57717	6.1149	2.80322	2.41189	9.5466	9.08827	8.37161
2610034O05Rik	10	80508769	80509623	+	855	0	0	0	0	0	0	0	0	0	0	0	0	0
2610035D17Rik	11;11;11;11;11;11;11;11;11;11;11;11	113043895;113043895;113043895;113044517;113067342;113067342;113067342;113072768;113172953;113172953;113201289;113201289	113045160;113045162;113045160;113045160;113067386;113067386;113067386;113072900;113173077;113173077;113201838;113201822	-;-;-;-;-;-;-;-;-;-;-;-	2121	2.17983	1.76039	2.12244	0.73079	0.442565	1.02185	0.706306	0.394458	0.573596	0.461628	0.739968	0.991091	0.510037
2610035F20Rik	14;14;14;14;14;14;14;14	122470284;122470377;122471391;122472993;122472993;122473271;122474448;122474903	122471689;122470589;122471689;122473177;122473177;122473579;122474602;122475199	-;-;-;-;-;-;-;-	2352	0	0	0	0	0	0	0	0.0273628	0	0	0	0	0
2610037D02Rik	15;15;15;15;15;15;15;15	96134819;96136809;96192699;96193211;96194563;96195924;96281499;96283183	96135528;96136928;96192894;96193947;96194664;96196081;96284495;96283608	-;-;-;-;-;-;-;-	5020	3.95893	4.71973	4.70469	2.88365	2.26463	5.45675	4.86001	1.97431	2.38888	2.22348	2.90456	3.46961	3.81906
2610042L04Rik	14;14;14;14;14;14;14;14;14;14;14	4334763;4339506;4339563;4348806;4348806;4349922;4349922;4350728;4350728;4353453;4353453	4334796;4339643;4339643;4348968;4348968;4350053;4350053;4350910;4350910;4354688;4353492	+;+;+;+;+;+;+;+;+;+;+	1886	0.0365887	0.101898	0.0345927	0	0	0.0638432	0.0378245	0.0170619	0	0.0622977	0	0	0
2610044O15Rik8	8;8;8;8;8;8;8;8;8;8;8;8;8;8;8;8;8;8;8;8;8;8;8;8;8;8	129216354;129217543;129217635;129217724;129218117;129220095;129220102;129220102;129220102;129221544;129221544;129221544;129221544;129221544;129221544;129221824;129221824;129221824;129221824;129221824;129221824;129233905;129233905;129233905;129234309;129234309	129217749;129217749;129217749;129217749;129220151;129220151;129220151;129220151;129220151;129221604;129221604;129221604;129221604;129221604;129221604;129221950;129221950;129221950;129221950;129221950;129221950;129234018;129234013;129234046;129234406;129234368	-;-;-;-;-;-;-;-;-;-;-;-;-;-;-;-;-;-;-;-;-;-;-;-;-;-	3859	3.69565	3.79195	4.85214	2.56775	2.14866	4.9455	5.22595	1.6844	1.14845	2.25812	3.11588	2.61469	3.23935
2610105M22Rik	9	35361961	35363113	-	1153	0	0	0	0	0	0	0	0	0	0	0	0	0
2610203C20Rik	9;9;9;9;9;9;9;9;9;9;9;9;9;9;9;9;9;9;9;9;9;9;9;9;9;9;9;9;9;9;9;9;9;9;9;9;9;9;9;9;9;9;9;9;9;9;9;9	41327260;41376397;41376526;41376561;41393194;41393194;41393194;41393194;41393378;41393378;41402124;41402124;41402124;41402124;41431754;41474855;41474893;41474937;41488194;41488194;41528123;41528123;41528123;41528123;41528123;41579494;41579974;41580713;41580741;41581174;41581253;41581267;41581339;41588494;41589974;41589974;41590199;41590220;41590220;41590220;41600272;41612560;41612560;41612560;416…	41327375;41376676;41376676;41376676;41393299;41393299;41393299;41393299;41393417;41393417;41402263;41402263;41402263;41402263;41432079;41475153;41475153;41475153;41488268;41488426;41528200;41528200;41528200;41528200;41528200;41580198;41580198;41581402;41581171;41581402;41581402;41581402;41581402;41592737;41592487;41590019;41590476;41592827;41592829;41592826;41600454;41612729;41612763;41615185;416…	+;+;+;+;+;+;+;+;+;+;+;+;+;+;+;+;+;+;+;+;+;+;+;+;+;+;+;+;+;+;+;+;+;+;+;+;+;+;+;+;+;+;+;+;+;+;+;+	11379	1.46957	1.54814	1.46303	1.34188	1.03574	2.18336	1.71042	1.12833	1.33515	1.35092	1.40819	1.58345	1.54223
2610203C22Rik	1;1;1;1;1;1;1;1;1;1;1;1;1;1;1;1;1;1;1;1	9560832;9563505;9563823;9600413;9601018;9603435;9619550;9619550;9619550;9619550;9620955;9620955;9620955;9620955;9620955;9631061;9631061;9631061;9631061;9631061	9561778;9563871;9563871;9603675;9601281;9603675;9619639;9619639;9619639;9619639;9621082;9621082;9621082;9621082;9621082;9631175;9631164;9631144;9631092;9631137	-;-;-;-;-;-;-;-;-;-;-;-;-;-;-;-;-;-;-;-	4910	1.6584	1.36433	1.54136	0.608818	1.00899	1.07901	1.49648	0.419437	0.707941	0.877412	0.793965	0.733932	0.354966
2610204G07Rik	13;13	104684931;104694362	104685289;104694994	+;+	992	1.04344	1.32843	0.789216	0.948664	0.89368	1.09241	0.719122	0.973146	1.66441	1.97402	0.765547	0.968711	1.09051
2610206C17Rik	7;7;7;7;7;7;7;7;7;7	84689640;84736995;84753127;84764875;84764875;84765259;84765259;84775215;84775703;84778955	84689814;84737139;84753227;84764900;84764900;84765294;84765294;84776549;84776020;84779053	+;+;+;+;+;+;+;+;+;+	1917	1.07991	1.03115	0.986966	0.721927	0.625678	0.81654	1.04196	0.570723	0.543973	0.663978	0.528202	0.830252	1.00322
2610300A13Rik	1	38767184	38767686	+	503	0	0	0	0	0	0	0	0	0	0	0	0	0
2610301B20Rik	4;4;4;4;4;4;4;4;4;4;4;4;4;4;4;4;4;4;4;4;4;4;4;4;4;4;4	10874498;10874525;10874565;10874568;10879523;10879523;10879523;10879523;10879539;10881801;10881801;10881801;10881801;10881801;10882407;10882407;10882407;10882407;10882407;10891622;10893263;10893263;10893263;10893263;10897896;10897896;10897899	10874772;10874772;10874693;10874772;10879610;10879610;10879610;10879610;10879610;10881868;10881868;10881868;10881868;10881868;10882472;10882472;10882472;10882472;10882472;10891778;10893358;10893358;10893469;10893358;10899425;10898073;10899421	+;+;+;+;+;+;+;+;+;+;+;+;+;+;+;+;+;+;+;+;+;+;+;+;+;+;+	2391	6.63799	6.23491	5.36178	3.77384	2.78084	6.96212	5.2809	3.55298	3.96155	5.40539	4.61604	3.66741	3.89603
2610303G11Rik	9;9	98186527;98186936	98186825;98187153	-;-	517	0	0	0	0	0	0	0	0	0	0	0	0	0
2610306M01Rik	6	86848399	86849440	-	1042	3.70859	2.16051	2.37926	2.23129	2.30216	1.84888	1.71154	1.35879	0.917368	1.69136	2.81807	1.72918	1.4996
2610306O10Rik	7	128538932	128539543	+	612	5.18675	4.21683	2.3453	2.80405	4.43095	3.5906	3.8466	2.8393	4.40178	3.27971	2.8954	4.41618	4.32087
2610307P16Rik	13;13;13;13;13;13;13;13;13;13;13;13;13;13;13;13;13;13;13;13;13;13;13;13;13;13;13;13;13	28460034;28460778;28460778;28460941;28480765;28505706;28505706;28505717;28513670;28516747;28516747;28521070;28561441;28561484;28608518;28608518;28668370;28668370;28668650;28669782;28711117;28772619;28772619;28772619;28883315;28883315;28883315;28885144;28885144	28461061;28461061;28461061;28461061;28480841;28505913;28505913;28505913;28513738;28516781;28516940;28521108;28561579;28561579;28608628;28608628;28668704;28668704;28668704;28669994;28711208;28772666;28772666;28772666;28883577;28883456;28883577;28885344;28885620	-;-;-;-;-;-;-;-;-;-;-;-;-;-;-;-;-;-;-;-;-;-;-;-;-;-;-;-;-	3293	5.7837	4.58544	4.69551	2.10133	2.1379	5.17393	5.15584	0.830607	0.791677	1.39746	1.29146	1.52293	1.93457
2610316D01Rik	3;3;3;3;3;3;3;3;3;3;3;3;3;3;3;3;3;3;3;3;3;3;3	45280437;45281310;45281350;45281995;45281995;45287332;45327045;45327066;45327066;45327771;45327771;45327771;45363700;45363700;45363700;45364630;45364630;45364630;45366305;45366305;45377868;45378142;45378142	45280533;45281408;45281408;45282164;45282164;45287452;45327162;45327162;45327162;45327858;45327858;45327858;45363787;45363787;45363787;45364751;45364670;45364751;45366348;45366348;45378010;45378205;45378260	-;-;-;-;-;-;-;-;-;-;-;-;-;-;-;-;-;-;-;-;-;-;-	1209	0	0.090833	0	0	0.0431339	0.0995932	0	0	0.0718774	0	0	0	0
2610318N02Rik	16;16;16;16;16;16;16;16;16;16;16;16;16;16;16	17113399;17113399;17117480;17117480;17117794;17117794;17118292;17118292;17120956;17120956;17121296;17121296;17123512;17124990;17124990	17113626;17113626;17117584;17117584;17117864;17117864;17118512;17118512;17121079;17121079;17121551;17121551;17123654;17125140;17125106	-;-;-;-;-;-;-;-;-;-;-;-;-;-;-	1299	0.0531226	0.211349	0.251123	0.596615	0.923344	0.463465	0.439334	0.173403	0.200692	0.602994	0.721032	0.369885	0.346994
2610507B11Rik	11;11;11;11;11;11;11;11;11;11;11;11;11;11;11;11;11;11;11;11;11;11;11;11;11;11;11;11;11;11;11;11;11;11;11;11;11;11;11;11;11;11;11;11;11;11;11;11;11;11;11;11;11;11;11;11;11;11;11;11;11;11;11;11;11;11;11;11;11	78261752;78261752;78262472;78262699;78262699;78263554;78263590;78263590;78263912;78263912;78263912;78264464;78265179;78265573;78266133;78266351;78266595;78266595;78266936;78266936;78267097;78267097;78268099;78268112;78268326;78268639;78269488;78271291;78271971;78272778;78272778;78273097;78273151;78273403;78273403;78273441;78273682;78273682;78274465;78274465;78274788;78274788;78275007;78277040;782…	78262309;78261917;78262828;78262828;78262828;78263639;78263639;78263639;78263966;78264059;78264032;78264582;78265239;78265762;78266474;78266474;78266719;78266719;78267003;78267003;78267242;78267242;78268217;78268180;78268489;78268897;78269693;78272383;78272383;78273299;78272969;78273299;78273299;78273424;78273559;78273559;78273902;78273902;78274655;78274655;78274887;78274887;78275209;78277334;782…	+;+;+;+;+;+;+;+;+;+;+;+;+;+;+;+;+;+;+;+;+;+;+;+;+;+;+;+;+;+;+;+;+;+;+;+;+;+;+;+;+;+;+;+;+;+;+;+;+;+;+;+;+;+;+;+;+;+;+;+;+;+;+;+;+;+;+;+;+	8798	26.4676	29.5076	27.4783	36.1855	34.9655	30.629	28.6264	21.2574	16.4209	18.7187	25.7255	27.0468	32.5157
2610507I01Rik	11;11	59199836;59201493	59200302;59202385	-;-	1360	9.24329	8.40464	8.22719	3.42605	4.98482	8.68533	7.71068	0.615181	0.383381	0.935916	3.03397	3.44462	3.64573
2610509F24Rik	9	118402465	118403302	-	838	0	0	0	0	0	0	0	0	0	0	0	0	0
2610524H06Rik	5;5	114821935;114823313	114822725;114823468	-;-	947	0.400776	1.15963	0.413359	1.69521	0.991214	0.826455	1.20527	0.577653	0.596461	0	0.801925	1.23672	2.15774
2610528A11Rik	14;14;14;14;14;14	37102140;37102142;37107374;37107374;37109979;37113951	37102691;37102691;37107454;37107454;37110101;37114022	-;-;-;-;-;-	828	0	0.132629	0.0787945	0	0.0944726	0.290841	0.0861557	0	0.104951	0	0.0611451	0.0725363	0.145168
2610528J11Rik	4;4;4;4;4;4	118526999;118527243;118529199;118529199;118529479;118529479	118527244;118527337;118529311;118529311;118529855;118530228	+;+;+;+;+;+	1202	3.27234	3.42608	2.17111	1.70401	1.04124	2.45424	1.54306	1.44563	1.15674	1.30331	2.02176	0.999336	1.14999
2700012I20Rik	9;9	57075216;57075958	57075843;57076013	-;-	684	2.32039	1.44496	2.00304	0.485591	1.37234	1.40828	1.46011	0.188179	1.01637	0.57258	1.33232	2.19518	1.58156
2700016F22Rik	4;4	139376549;139377800	139377573;139380379	-;-	3605	4.91945	4.27738	4.37962	4.15372	4.06486	4.82635	5.58031	4.03461	3.32654	4.37273	4.65554	3.79853	4.27614
2700029L08Rik	5	134519325	134520789	-	1465	2.02544	2.02393	1.78135	2.00269	3.0257	3.34924	1.7043	1.14218	1.18634	1.53717	1.38234	1.78335	3.42546
2700033N17Rik	2;2	116066218;116067125	116066618;116067444	-;-	721	0.287127	0.761561	0.67866	0.345504	0.361643	1.16901	0.395767	0	0.241053	0.271598	0.561755	0.249903	0.416778
2700038G22Rik	5;5;5;5;5;5;5	23850597;23850601;23852121;23852121;23852718;23852718;23853767	23850621;23850621;23852155;23852155;23852979;23852760;23855038	+;+;+;+;+;+;+	1594	1.25545	1.06786	0.859523	1.18077	2.02838	1.58631	1.29785	3.02811	3.76166	3.68549	2.2392	2.27957	2.58269
2700046A07Rik	18;18;18;18;18	62751674;62754790;62755126;62755924;62755924	62753333;62755174;62755174;62756347;62756315	-;-;-;-;-	2469	0.111796	0.155674	0.184971	0	0	0.024384	0.202251	0.0260662	0	0.0396562	0.0615166	0	0
2700046G09Rik	19;19	32389216;32389705	32389376;32391184	+;+	1641	0.672822	0.568827	0.318059	0.371073	0.476681	0.843811	0.217358	0.392184	0.68842	0.178997	0.586188	1.02479	0.732472
2700049A03Rik	12;12;12;12;12;12;12;12;12;12;12;12;12;12;12;12;12;12;12;12;12;12;12;12;12;12;12;12;12;12;12;12;12;12;12;12;12;12;12;12;12;12;12;12;12;12;12;12;12;12;12;12;12;12;12;12;12;12;12;12;12;12;12;12;12;12;12;12;12;12;12;12;12;12;12	71136848;71136848;71139655;71139655;71140865;71140865;71142050;71142050;71148244;71148244;71150243;71150243;71150434;71151385;71152650;71152650;71152650;71154762;71154762;71154762;71157047;71157047;71158828;71158828;71160191;71160191;71161124;71161124;71162576;71162576;71164384;71164384;71167066;71167066;71170519;71170519;71170589;71173129;71173129;71173129;71175923;71175923;71175923;71177829;711…	71138038;71138038;71139728;71139728;71140934;71140934;71142119;71142119;71148418;71148418;71150464;71150464;71150464;71151500;71152797;71152797;71152797;71154887;71154923;71154923;71157170;71157170;71158957;71158957;71160408;71160408;71161196;71161196;71162800;71162800;71164558;71164558;71167260;71167260;71170706;71170706;71170706;71173239;71173239;71173239;71176003;71176003;71176003;71178022;711…	+;+;+;+;+;+;+;+;+;+;+;+;+;+;+;+;+;+;+;+;+;+;+;+;+;+;+;+;+;+;+;+;+;+;+;+;+;+;+;+;+;+;+;+;+;+;+;+;+;+;+;+;+;+;+;+;+;+;+;+;+;+;+;+;+;+;+;+;+;+;+;+;+;+;+	5879	4.073	3.62383	4.40568	3.06965	2.56354	4.31638	3.74947	1.653	1.07904	1.5322	2.5792	2.87581	3.12815
2700060E02Rik	14;14;14;14;14;14;14;14	19811402;19812349;19814537;19816185;19817061;19819907;19822566;19823669	19812237;19812397;19814605;19816273;19817147;19820006;19822690;19823823	-;-;-;-;-;-;-;-	1510	25.5003	30.727	37.5249	38.1636	24.8657	33.0524	38.7629	32.0721	18.0705	23.797	32.4557	30.925	31.8009
2700062C07Rik	18;18;18;18;18	24470861;24471062;24472950;24475525;24477269	24470980;24471084;24473149;24475724;24477765	+;+;+;+;+	1040	6.50251	6.86357	5.2068	4.57763	4.46274	4.92053	4.18418	6.74515	4.17787	5.46043	7.03439	5.19751	3.98736
2700068H02Rik	4;4	106554669;106557386	106556028;106557897	-;-	1872	0	0	0	0	0	0.0643206	0.114322	0.0687579	0.0464208	0.156909	0	0.0320834	0
2700069I18Rik	3;3;3;3;3;3	5177586;5178980;5178980;5202638;5220670;5220670	5178389;5179041;5179041;5202737;5220841;5220823	-;-;-;-;-;-	1138	0	0	0	0.0486444	0.045825	0	0	0	0	0	0	0	0
2700078F05Rik	1	181950132	181953375	-	3244	1.72303	2.18348	1.2268	0.90442	0.337585	1.70739	1.12151	0.833234	1.66085	2.11276	0.655482	0.647997	0.592842
2700080J24Rik	7	16889406	16891067	-	1662	0	0.0330376	0.117765	0.0333077	0.0627544	0.108672	0	0	0.104572	0	0.0304622	0	0.108483
2700081O15Rik	19;19;19;19;19;19;19;19;19;19;19;19;19;19;19;19;19;19	7417625;7418717;7420067;7420090;7420409;7420419;7421028;7421255;7421255;7421397;7421593;7421914;7421914;7421914;7422643;7422643;7422643;7422643	7417917;7421088;7420561;7420561;7420485;7420561;7421644;7421469;7421644;7421644;7421644;7422324;7422462;7422462;7425540;7422672;7425904;7423338	+;+;+;+;+;+;+;+;+;+;+;+;+;+;+;+;+;+	7032	4.1706	4.54838	4.11937	2.89304	3.40021	5.03413	4.0477	0.960968	1.13073	1.27402	2.03391	2.21211	2.13236
2700089I24Rik	19;19;19;19;19	59493136;59493557;59556309;59557429;59558021	59493262;59493644;59556420;59557557;59559391	+;+;+;+;+	1827	0	0	0	0	0	0	0	0	0	0	0	0	0
2700097O09Rik	12;12;12;12;12;12;12;12;12;12;12;12;12;12;12;12	55045661;55045676;55048887;55048887;55053301;55053301;55053754;55057242;55059457;55059457;55061055;55061055;55062988;55062988;55079981;55079981	55045943;55045943;55048977;55048977;55054101;55053407;55057352;55057352;55059578;55059578;55061193;55061193;55063109;55063109;55080108;55080110	-;-;-;-;-;-;-;-;-;-;-;-;-;-;-;-	4939	1.71852	1.8566	1.82291	1.22539	1.24412	2.49885	2.1521	0.742736	0.809352	0.991205	1.23008	1.20996	1.40544
2700099C18Rik	17;17;17;17;17;17;17;17;17;17;17;17;17;17;17;17;17;17;17;17;17;17;17;17;17;17;17;17;17;17;17;17	94750100;94750112;94750138;94752495;94752703;94755211;94755211;94755211;94756434;94756434;94756434;94759603;94761498;94761498;94762462;94762462;94762503;94763772;94763772;94763772;94766857;94766857;94766857;94771113;94771134;94771134;94771857;94771857;94771857;94774892;94774892;94774892	94750232;94750232;94750232;94752619;94752875;94755305;94755305;94755305;94756523;94757016;94756523;94759693;94761604;94761604;94762620;94762620;94762566;94763924;94763924;94763924;94766947;94766947;94766947;94771238;94771238;94771238;94771960;94771960;94771960;94775026;94775132;94775129	+;+;+;+;+;+;+;+;+;+;+;+;+;+;+;+;+;+;+;+;+;+;+;+;+;+;+;+;+;+;+;+	2181	0.601155	0.629397	1.07689	1.72595	1.29117	1.62863	1.04667	0.944262	0.39844	0.718285	1.32316	0.715985	0.881788
2810001G20Rik	11;11;11;11;11	64079484;64079582;64079859;64082653;64082653	64079777;64079777;64080014;64083259;64083259	+;+;+;+;+	1057	3.19897	3.48049	3.20963	2.35675	2.36816	4.38573	3.98191	2.3137	1.2332	1.29684	2.56254	3.29563	4.00852
2810002D19Rik	2;2	94406151;94410459	94406966;94411682	+;+	2040	3.89006	3.28375	3.58191	3.03923	3.27209	4.33824	3.14722	2.30298	2.47068	2.06382	2.68031	3.50351	3.41741
2810004N23Rik	8;8;8;8;8;8;8;8;8;8;8;8	124836945;124838488;124840448;124841294;124841687;124842363;124857690;124860049;124860946;124862885;124862885;124862885	124837672;124839966;124840506;124841380;124841782;124842419;124861271;124861271;124861271;124863120;124862965;124863014	-;-;-;-;-;-;-;-;-;-;-;-	6324	3.58998	3.87243	3.3013	2.93681	2.86143	3.73182	3.24874	2.64594	2.98872	3.30288	3.43445	2.88714	2.86052
2810006K23Rik	5;5;5;5;5	124328089;124328098;124338627;124338627;124340609	124328229;124328229;124338935;124340122;124341844	+;+;+;+;+	2873	2.13768	2.0832	2.54336	2.19657	1.83329	2.07456	1.98641	0.358412	0.272223	0.477117	0.916347	1.35883	1.67349
2810013P06Rik	8	123042466	123044602	+	2137	5.55408	5.75551	4.39627	3.41936	3.53841	5.04283	5.10742	3.04169	3.17182	2.70321	4.52503	4.0471	3.69821
2810021J22Rik	11;11;11;11;11;11;11;11;11	58867216;58867267;58868815;58868815;58876694;58876694;58877943;58878776;58879929	58867309;58867309;58869006;58869006;58876820;58876820;58878004;58878868;58883288	+;+;+;+;+;+;+;+;+	3928	2.35408	1.82423	1.49485	1.02174	1.30545	2.03082	1.85843	1.17967	1.1504	0.997059	1.22446	1.11619	1.88698
2810025M15Rik	1;1;1;1;1;1;1;1;1	157412352;157412640;157412978;157413744;157413744;157419235;157419869;157419869;157419902	157413125;157412691;157413271;157413795;157413795;157419304;157420233;157420236;157420152	+;+;+;+;+;+;+;+;+	1410	10.8893	10.2418	10.1796	4.35792	4.77107	7.13056	7.99378	2.14525	1.04773	1.31937	5.17054	4.60035	3.02628
2810029C07Rik	12;12	111572321;111573873	111573740;111574402	-;-	1950	0.849308	0.703956	0.368031	0.255495	0.187201	0.771847	0.329247	0.660076	0.490204	1.25527	0.908711	0.462001	0.215741
2810030D12Rik	8;8;8;8;8;8;8;8	13200720;13200728;13200752;13200820;13201688;13207364;13207364;13207526	13201293;13201293;13201790;13201293;13201725;13207707;13207702;13207714	+;+;+;+;+;+;+;+	1422	0.630859	0.733659	1.00937	0.155717	0.550094	1.39714	1.00333	0.0452584	0	0	0.569656	0.295654	0.380376
2810032G03Rik	12;12;12;12	5375870;5411641;5414902;5414902	5376528;5412424;5416305;5416631	+;+;+;+	3173	0.456707	0.276879	0.246739	0.122125	0.0657408	0.284608	0.202342	0.0811313	0.0821617	0	0.143603	0.075714	0.22729
2810039B14Rik	15;15;15;15;15;15;15;15;15;15;15;15;15;15;15;15	75642129;75642475;75642484;75643486;75643987;75644499;75644663;75645349;75645349;75645349;75646076;75646458;75646458;75646458;75649852;75651226	75642511;75642511;75642511;75643601;75644479;75646732;75645444;75645453;75645444;75645444;75646967;75646642;75646485;75647437;75649920;75653643	+;+;+;+;+;+;+;+;+;+;+;+;+;+;+;+	6418	0.473088	0.620267	0.376122	0.215633	0.2397	0.515928	0.216745	0.100276	0.12186	0.183069	0.228765	0.173124	0.168555
2810047C21Rik1	7;7;7;7;7;7;7;7;7;7	8086326;8086387;8088142;8088142;8088989;8088989;8090261;8090261;8092761;8092761	8086971;8086971;8088228;8088228;8089114;8089114;8090299;8090299;8092838;8093041	-;-;-;-;-;-;-;-;-;-	1179	0.117059	0.0931443	0.147749	0.407081	0.206561	0.0510637	0.332785	0.163759	0.0243231	0	0.27182	0.352516	0.136103
2810049E08Rik	13;13;13	83891208;83910729;83927903	83891414;83910815;83928710	+;+;+	1102	0	0	0	0	0	0	0	0	0	0	0	0	0
2810402E24Rik	14	20641009	20644048	+	3040	1.02147	1.26434	1.33059	0.928692	0.823403	1.62393	1.05597	0.973829	1.02908	0.901814	1.56548	1.00759	1.20594
2810403A07Rik	3;3;3;3;3;3;3;3;3;3;3;3;3;3;3;3;3;3;3;3;3;3;3;3;3;3;3;3;3;3;3;3;3;3;3;3;3;3;3;3;3;3;3;3;3;3;3;3;3;3;3;3;3;3;3;3;3;3;3;3;3;3;3;3;3;3;3;3;3;3;3;3;3;3;3;3;3;3;3;3;3;3	88685803;88685814;88685827;88685827;88685833;88685837;88686344;88686344;88686344;88686344;88686344;88686344;88689175;88689175;88689175;88689175;88689175;88689624;88689624;88689624;88689624;88689624;88693076;88693076;88693076;88693076;88693076;88693421;88693421;88693421;88693421;88693421;88693441;88696565;88696565;88696565;88696565;88696565;88696565;88698839;88698849;88698849;88698849;88698849;886…	88685887;88685887;88685887;88685887;88685887;88685887;88686566;88686566;88686566;88688062;88686566;88686566;88689303;88689303;88689303;88689303;88689303;88689703;88689703;88689703;88689703;88689703;88693128;88693128;88693128;88693128;88693128;88693584;88693584;88693584;88693584;88693584;88693584;88696776;88696776;88696776;88696776;88696776;88696776;88698909;88698909;88698909;88698909;88698909;886…	+;+;+;+;+;+;+;+;+;+;+;+;+;+;+;+;+;+;+;+;+;+;+;+;+;+;+;+;+;+;+;+;+;+;+;+;+;+;+;+;+;+;+;+;+;+;+;+;+;+;+;+;+;+;+;+;+;+;+;+;+;+;+;+;+;+;+;+;+;+;+;+;+;+;+;+;+;+;+;+;+;+	6720	10.0942	10.3975	10.0096	11.0014	12.0245	11.9614	10.8651	8.77252	9.15551	12.0786	10.9355	10.734	13.889
2810403D21Rik	X;X;X;X;X;X;X;X;X;X;X;X;X;X;X;X;X;X;X;X;X;X;X;X;X;X;X;X;X;X;X;X;X;X	108833800;108834478;108834502;108834578;108834657;108834664;108834679;108834695;108836229;108836266;108836266;108836266;108836266;108836266;108836266;108836266;108855880;108858268;108871472;108871472;108871472;108874268;108874268;108886345;108886345;108886345;108901464;108901464;108903386;108925435;108972121;108972121;108974265;108974265	108833955;108834685;108834685;108834685;108834773;108834773;108834773;108835004;108836355;108836355;108836355;108839502;108836355;108836355;108836355;108836355;108855929;108858372;108871598;108871598;108871598;108874770;108874974;108886683;108886690;108886896;108901555;108901555;108904353;108926529;108972170;108972170;108974906;108974398	+;+;+;+;+;+;+;+;+;+;+;+;+;+;+;+;+;+;+;+;+;+;+;+;+;+;+;+;+;+;+;+;+;+	8345	0.835187	0.914594	0.816207	0.510787	0.481182	1.04609	1.00017	0.425245	0.470685	0.633578	0.758361	0.676531	0.748991
2810404F17Rik	16;16	95806029;95808076	95807490;95808317	-;-	1704	0	0.0322233	0	0.0324867	0.0918114	0	0	0.0755368	0.101995	0	0.20798	0.334842	0.211617
2810404M03Rik	8;8;8;8;8;8	41827267;41875120;41877100;42026661;42044659;42045604	41827470;41875187;41877171;42026750;42044870;42046202	+;+;+;+;+;+	1245	0	0	0	0	0	0	0	0	0	0	0	0	0
2810405F15Rik	2	116075165	116076096	-	932	0	0	0	0	0	0	0	0	0	0.105055	0	0	0.0644843
2810405F17Rik	4	137387266	137388382	-	1117	3.15069	2.60533	2.56996	0.991179	2.89457	3.39558	2.04367	1.49802	1.40035	1.5778	2.31158	2.20453	2.04456
2810407A14Rik	16;16;16;16;16;16;16;16;16	87784075;87787572;87787745;87792522;87829277;87831398;87833723;87835647;87838025	87784592;87787844;87787844;87793602;87829556;87831485;87833785;87835845;87839293	+;+;+;+;+;+;+;+;+	3771	0.128094	0.0873645	0.121107	0.132118	0.179776	0.0798251	0.0945862	0.42666	0.483929	0.701035	0.228236	0.159268	0.254996
2810408A11Rik	11;11;11;11;11;11;11;11;11;11;11;11;11;11;11;11;11;11;11;11;11;11;11;11;11;11;11;11;11;11;11;11;11;11;11;11;11;11;11;11;11;11;11;11;11;11;11;11;11;11;11;11;11;11;11;11;11;11;11;11;11;11;11	69897352;69897358;69897363;69897363;69897363;69897466;69897466;69897572;69897611;69897619;69897619;69898103;69898103;69898103;69898103;69898205;69898252;69898252;69898252;69898252;69898252;69898847;69898847;69898847;69898847;69898847;69898847;69898847;69898847;69899183;69899199;69899199;69899199;69899199;69899199;69899199;69899199;69899211;69899517;69899517;69899517;69899517;69899517;69899517;698…	69897492;69897492;69897492;69897492;69897492;69897492;69897492;69897636;69898150;69898410;69897754;69898410;69898150;69898150;69898150;69898410;69898410;69898410;69898410;69898410;69898410;69899092;69899092;69899092;69899092;69899092;69899092;69899092;69899092;69899256;69899287;69899287;69899287;69899287;69899287;69899287;69899287;69899287;69899647;69899588;69899588;69899588;69899588;69899588;698…	-;-;-;-;-;-;-;-;-;-;-;-;-;-;-;-;-;-;-;-;-;-;-;-;-;-;-;-;-;-;-;-;-;-;-;-;-;-;-;-;-;-;-;-;-;-;-;-;-;-;-;-;-;-;-;-;-;-;-;-;-;-;-	2368	0.466259	0.417379	0.606132	0.25715	0.198201	0.533905	0.421755	0.163068	0.073395	0.289434	0.448983	0.278995	0.253798
2810408I11Rik	1;1;1;1;1;1;1	64679871;64683348;64685832;64688789;64689124;64690464;64690464	64680385;64683429;64685903;64688924;64690628;64690659;64690608	-;-;-;-;-;-;-	2341	0	0.0469103	0	0.0709406	0.0222763	0.102869	0.182837	0.302405	0.334087	0.167298	0.0865069	0.0769672	0.154035
2810410L24Rik	11;11;11;11;11	120185400;120187707;120188489;120188489;120189440	120187751;120187751;120188751;120188676;120189852	-;-;-;-;-	3028	1.91431	1.61389	2.04689	0.639864	0.981666	1.72977	1.36643	0.425082	0.286987	0.388023	0.80256	0.892571	0.635132
2810414N06Rik	1;1	151748949;151754918	151750228;151755018	-;-	1381	0.749525	0.47712	0.37794	0.24051	0.151047	0.261567	0.309936	0.186408	0	0.0708988	0.219963	0.304432	0.0870375
2810417H13Rik	9;9;9;9;9;9;9;9;9	65890237;65890320;65890362;65890732;65890732;65890732;65893372;65893372;65901558	65890474;65890474;65890474;65890809;65893148;65890809;65893820;65893534;65903266	+;+;+;+;+;+;+;+;+	4813	1.0323	1.31767	1.59275	3.32972	2.58957	2.25156	1.90459	0.541549	0.695126	0.52892	0.852043	0.68633	1.24244
2810425M01Rik	10;10;10	77486664;77515285;77515652	77487432;77515586;77516430	+;+;+	1850	2.57375	3.29451	3.45605	3.97974	4.00278	2.92885	3.74037	2.50472	1.87891	2.16992	2.87349	3.40882	4.02828
2810428I15Rik	8;8;8;8;8;8;8;8;8;8;8;8;8;8;8;8;8;8;8;8;8;8;8;8;8;8;8;8	70504292;70504295;70504295;70504295;70504299;70504398;70504984;70504984;70504984;70504984;70504984;70505245;70505756;70505756;70505756;70505756;70505756;70505756;70505851;70506292;70506497;70506497;70506497;70506497;70506662;70506662;70506662;70506662	70504509;70504509;70504509;70504509;70504528;70504509;70505060;70505060;70505060;70505060;70505060;70505960;70505960;70506108;70505960;70505960;70505960;70506112;70506579;70506426;70506579;70506579;70506579;70506721;70506699;70506713;70506737;70506752	-;-;-;-;-;-;-;-;-;-;-;-;-;-;-;-;-;-;-;-;-;-;-;-;-;-;-;-	1822	6.36282	6.05742	5.9441	6.47152	7.44166	4.1634	5.32482	3.03773	1.24006	2.79439	4.41816	3.75788	3.85929
2810428J06Rik	3	135425237	135427932	-	2696	0.97264	1.4053	1.11318	0.821326	0.677007	1.78647	1.27009	0.883243	0.67689	1.28926	0.788718	0.735157	1.71649
2810429I04Rik	13;13;13;13;13;13;13;13;13;13;13;13;13;13;13;13;13;13;13;13;13;13;13;13;13;13;13;13;13;13;13;13;13;13;13;13;13;13;13;13;13;13;13	3478230;3478234;3478243;3478243;3478246;3478255;3478262;3478277;3478303;3478304;3478326;3479522;3479522;3479522;3479909;3479909;3479909;3479909;3479909;3479909;3479909;3479909;3479909;3485031;3485049;3485049;3485049;3485049;3485049;3485049;3485049;3485049;3485049;3485049;3488986;3488986;3492182;3497960;3497960;3498045;3498275;3498275;3500916	3480001;3478390;3480001;3478352;3478352;3478352;3478790;3478352;3478352;3478390;3478390;3479574;3479574;3479574;3480001;3480001;3480001;3480001;3480001;3480001;3480001;3480001;3480001;3486177;3485220;3485220;3485220;3485398;3488561;3485749;3485220;3485220;3488058;3485187;3489263;3489283;3492406;3498110;3498156;3498156;3498358;3498570;3501393	+;+;+;+;+;+;+;+;+;+;+;+;+;+;+;+;+;+;+;+;+;+;+;+;+;+;+;+;+;+;+;+;+;+;+;+;+;+;+;+;+;+;+	6797	0.0507623	0.0161567	0.0575917	0.0610828	0.069051	0.177149	0.0419814	0.0284055	0.012785	0.0144051	0.0446916	0.0618539	0.0972625
2810430I11Rik	2;2	27882925;27886826	27886113;27887052	-;-	3416	0.737333	0.835845	0.534769	0.866984	0.610642	0.652094	0.438547	0.3768	0.305268	0.2293	0.429806	0.246148	1.00283
2810432F15Rik	5;5;5;5	131615438;131619679;131622230;131624864	131615598;131619907;131622272;131625087	+;+;+;+	657	1.26039	0.501448	0.297908	0.337031	0.238123	0.549809	0.21716	0.293869	0.132267	0	0.154119	0	0.0914754
2810433D01Rik	11;11;11;11;11;11;11	102619796;102621318;102621478;102622058;102622058;102624278;102624278	102620460;102621570;102621570;102622205;102622205;102624416;102624366	-;-;-;-;-;-;-	1205	2.11886	1.45815	1.51599	0.413457	0.73571	1.24905	2.01283	0.640903	0.36058	0.0812541	0.294106	0.19937	0.448875
2810442N19Rik	1;1;1;1;1;1	162004969;162005172;162005436;162005436;162016320;162016320	162005334;162005334;162005822;162005537;162016485;162016494	+;+;+;+;+;+	928	1.4872	1.95257	1.68729	0.715828	1.33013	1.94625	2.15241	2.01117	1.68556	1.68812	0.763787	0.647199	0.777147
2810454H06Rik	6	134897961	134901108	+	3148	0.416493	0.872118	0.476672	0.211019	0.198789	0.458989	0.385238	0.306658	0.386466	0.497643	0.466397	0.381576	0.362734
2810455O05Rik	8;8	123838553;123839357	123838814;123840785	-;-	1691	0.754947	1.16896	0.810218	0.294628	0.462586	1.12148	0.801538	0.399617	0.102779	0.318458	0.314368	0.461727	0.319866
2810459M11Rik	1;1;1;1;1;1	86045863;86045863;86048588;86048591;86052950;86052950	86046572;86046572;86048701;86048701;86053353;86055456	+;+;+;+;+;+	3331	0.103582	0.197809	0.0881382	0.0498565	0.0313112	0.162665	0.0428321	0.0579622	0.0521764	0.0293939	0.121593	0.0540919	0
2810468N07Rik	17;17	25570811;25573986	25571101;25575043	+;+	1349	0.102307	0.284922	0.290179	0.164143	0.115972	0.312401	0.211525	0	0	0	0.412832	0.311654	0.311857
2810471M01Rik	11;11;11	28681564;28683524;28692389	28682119;28683676;28693276	+;+;+	1597	0.0864199	0	0.0408528	0.0346633	0	0	0	0.0402989	0	0	0	0	0
2810474O19Rik	6;6;6;6;6;6;6;6;6;6;6;6;6;6;6;6;6;6;6;6;6;6;6;6;6;6;6;6;6;6;6;6;6;6;6;6;6;6;6;6	149309414;149309428;149309456;149309474;149309474;149309573;149309728;149310322;149310322;149310322;149310322;149310322;149310322;149310322;149311416;149311483;149317334;149317635;149317635;149324656;149324732;149324732;149324732;149325405;149325405;149325405;149325405;149325405;149325405;149325405;149325405;149325458;149331426;149331426;149331426;149331432;149334592;149334592;149334592;149334592	149309904;149309904;149309904;149309904;149309904;149309904;149309904;149310455;149310377;149310377;149310359;149310377;149310377;149310377;149314366;149311606;149317708;149317708;149317708;149324800;149324800;149324800;149324800;149325967;149325489;149325773;149329784;149329784;149328977;149326671;149329784;149329784;149331506;149331506;149331506;149331506;149335658;149334930;149334930;149335663	+;+;+;+;+;+;+;+;+;+;+;+;+;+;+;+;+;+;+;+;+;+;+;+;+;+;+;+;+;+;+;+;+;+;+;+;+;+;+;+	9629	27.5373	29.3988	29.8057	33.1393	26.9807	28.3118	34.0645	70.7971	65.2086	51.2588	48.086	57.8209	50.2794
2900002M20Rik	1	25824390	25824719	-	330	0	0	0	0	0	0	0	0	0	0	0	0	0
2900005J15Rik	5;5;5;5;5;5	25100983;25101458;25103128;25104721;25109184;25109647	25103007;25102367;25103231;25104827;25109412;25110109	+;+;+;+;+;+	2928	1.29622	1.53774	1.29236	0.926404	1.15768	1.51806	1.12073	0.703359	0.712293	0.668793	1.26225	1.09741	0.985235
2900009J06Rik	1;1;1;1	127753616;127753616;127773928;127773928	127753953;127753948;127774054;127774092	-;-;-;-	503	0	0.109162	0.129705	0.110054	0.207351	0.11969	0	0	0.345526	0.194655	0	0.358211	0.119482
2900011O08Rik	16;16;16;16;16;16;16;16;16;16;16;16;16;16;16	13986604;13986657;13986674;14049383;14049383;14088946;14088946;14088946;14093889;14093889;14095904;14095904;14095904;14099793;14099793	13986893;13986893;13986893;14049506;14049506;14089019;14089019;14089019;14094003;14094003;14095986;14095987;14095986;14100228;14101500	+;+;+;+;+;+;+;+;+;+;+;+;+;+;+	2395	0	0.0229263	0	0	0	0.0251374	0	0.0806147	0.253987	0	0.0422782	0.0501546	0.075281
2900018N21Rik	11	18888261	18889840	-	1580	2.05272	2.64117	2.89046	0.910944	1.08919	2.61011	2.9799	0.407325	0.274999	0.309846	1.02538	0.874292	1.06505
2900022M07Rik	1	25808956	25809972	-	1017	0	0	0	0	0	0	0	0	0	0	0	0	0
2900026A02Rik	5;5;5;5;5;5;5;5;5;5;5;5;5;5;5;5;5;5;5;5;5;5;5;5;5;5;5;5;5	113086323;113086323;113086323;113092415;113092415;113092415;113093102;113093102;113093102;113093966;113093966;113093966;113095590;113095590;113095590;113097598;113097598;113097598;113101459;113101459;113101459;113137705;113163058;113175205;113182054;113188286;113190604;113193761;113221211	113091024;113091024;113091024;113092497;113092497;113092497;113093244;113093244;113093244;113094084;113094084;113094084;113095764;113095764;113095764;113097838;113097838;113097838;113101577;113101577;113101577;113137986;113163351;113175339;113184717;113188373;113192199;113193907;113221236	-;-;-;-;-;-;-;-;-;-;-;-;-;-;-;-;-;-;-;-;-;-;-;-;-;-;-;-;-	10814	10.513	11.6707	9.81886	5.86898	5.98694	11.2124	9.71037	6.76663	10.2698	9.59963	7.90041	7.41171	4.75171
2900027M19Rik	8	9685829	9690276	-	4448	0	0.0123446	0	0	0.0273172	0.0203026	0	0.0144688	0	0.0220124	0	0	0
2900035J10Rik	1	194732707	194733238	+	532	1.03769	2.06423	1.34899	1.04055	0.490121	2.37648	2.14547	4.35501	2.94022	1.84044	3.3308	2.93527	1.24266
2900037B21Rik	7	79512924	79513260	+	337	0	0.325867	0	0	0	0	0	0	0	0	0	0	0
2900041M22Rik	11;11	117611247;117612262	117611434;117613857	+;+	1784	0.309445	0.18467	0.219423	0.0930897	0.0292314	0	0.119961	0	0	0	0	0.0673319	0.033688
2900042K21Rik	1	189210361	189211013	-	653	0.211351	0.75678	0.399644	0.339096	0.0798604	0.553177	0	0	0	0	0.0775316	0.0919756	0
2900052L18Rik	11;11	120229802;120231495	120231298;120231585	-;-	1588	4.47585	3.52687	4.14951	1.08065	1.14938	3.63954	3.50395	0.810546	0.766119	0.986511	2.86935	1.89106	0.946149
2900052N01Rik	9;9;9;9;9;9;9;9;9;9	46913493;46913603;46913627;46920531;46920531;46920531;46922351;46922351;46926423;46926423	46913746;46913746;46913746;46921746;46922567;46921951;46922426;46922426;46927366;46927366	+;+;+;+;+;+;+;+;+;+	3235	0	0	0	0	0.0322404	0	0	0.0198941	0	0.0302662	0	0.0185657	0
2900055J20Rik	18	40256962	40257684	+	723	0.524944	0.0759455	0	0	0	0.16654	0	0	0	0	0	0	0
2900060B14Rik	1;1	118458652;118458670	118459267;118458747	-;-	616	2.35249	2.62955	2.22415	1.97705	3.04766	1.85694	1.6792	1.7761	2.75088	1.27157	1.47939	2.19375	2.9757
2900064F13Rik	5	81826816	81827823	+	1008	0.0684586	0.0544728	0.194172	0	0.10347	0.238905	0.141542	0.127693	0	0.194268	0.150679	0.17875	0.0596224
2900064K03Rik	5	49515825	49518937	-	3113	3.87925	3.12201	3.05985	0.906914	0.77059	2.92028	2.87593	0.392801	0.0279151	0.125809	0.260215	0.308693	0.695013
2900069G24Rik	1	181381178	181382488	+	1311	0	0	0	0	0	0	0	0	0	0	0	0	0
2900072N19Rik	2;2	92054989;92059219	92055643;92059369	-;-	806	0.0856157	0	0	0	0.0647008	0.0746949	0	0	0	0	0	0	0
2900076A07Rik	7;7;7;7;7;7;7;7;7;7;7;7;7;7;7;7;7;7;7;7;7;7;7	81523550;81523563;81523571;81523571;81523618;81528400;81528777;81528787;81528787;81528787;81528787;81528792;81529157;81529157;81529157;81529157;81529347;81529347;81529347;81529347;81529347;81531211;81531211	81523676;81523676;81523723;81523676;81523723;81528940;81528940;81528940;81528940;81528940;81528940;81528940;81529590;81529258;81529240;81529554;81529527;81529527;81529511;81529438;81530146;81531498;81531494	+;+;+;+;+;+;+;+;+;+;+;+;+;+;+;+;+;+;+;+;+;+;+	1993	3.86061	3.93975	3.42086	2.51372	2.89134	3.38327	3.65096	2.05052	1.43888	2.11249	2.81973	2.83274	2.48781
2900076G11Rik	5	31581079	31581709	+	631	0.437441	0.174037	0.413578	0.263189	0.247934	0.0954106	0.339161	0.611956	1.23946	1.70685	0.641879	0.285547	0.190489
2900079G21Rik	9;9;9;9;9;9;9;9;9;9;9;9	112234277;112234294;112234381;112235103;112235103;112256574;112276595;112278554;112278554;112279243;112345337;112346536	112234377;112234377;112234603;112236018;112236020;112256749;112278215;112278701;112278701;112280333;112345386;112348925	+;+;+;+;+;+;+;+;+;+;+;+	6718	0	0	0	0.00824015	0	0	0.0106188	0	0	0	0	0	0
2900089D17Rik	5;5;5;5	144241690;144241777;144244433;144256079	144242090;144242090;144246506;144256186	-;-;-;-	2583	1.73651	1.19043	1.37657	1.54306	1.6959	2.58717	1.93325	2.04309	2.69144	2.08483	1.58764	3.9761	2.39653
2900092C05Rik	7;7;7;7;7;7	12512517;12512816;12515456;12550484;12554618;12556013	12512699;12512908;12515497;12550583;12554775;12556323	+;+;+;+;+;+	887	0	0	0	0	0	0.0339369	0	0	0	0	0.057078	0	0.135512
2900092N22Rik	2	14673404	14674812	+	1409	2.20389	2.88377	3.65799	1.80727	0.851259	4.78556	4.05036	1.91839	0.801772	1.94572	1.14982	0.980399	2.51658
2900092O11Rik	1	184442980	184443734	+	755	0.182798	0.0727266	0	0.146642	0	0	0	0.170483	0.115099	0.129684	0	0	0
2900093K20Rik	2	163419795	163420361	+	567	1.33875	0.774724	1.78351	0.781056	1.74749	2.1236	1.25815	0.113505	0.613049	0.518049	0.803622	1.80074	1.58993
2900097C17Rik	2;2	156391831;156392491	156392979;156392829	-;-	1149	39.7882	41.2971	33.0513	35.0418	31.642	34.3111	33.1956	35.5299	32.0674	33.0913	34.8612	30.6139	28.0056
3000002C10Rik	9;9;9;9;9	109827943;109830176;109830374;109832213;109832347	109831429;109831429;109831381;109832702;109832706	-;-;-;-;-	3981	0.520017	0.655151	0.508038	0.266566	0.327486	0.438563	0.340468	0.0969968	0.130972	0.147568	0.356089	0.346994	0.347221
3010001F23Rik	X;X;X;X;X;X;X;X;X;X;X;X;X;X;X;X;X;X	152368573;152369028;152369028;152369842;152369842;152369842;152369842;152382459;152385645;152385645;152385645;152402596;152402968;152403313;152403313;152416291;152416291;152416291	152368694;152369116;152369116;152370022;152370022;152370022;152370022;152382530;152385752;152386200;152385752;152402740;152403045;152403477;152403477;152416698;152416698;152416698	+;+;+;+;+;+;+;+;+;+;+;+;+;+;+;+;+;+	1816	0.265993	0.483776	0.179631	0.121932	0.287163	0.696193	0.0392824	0.106317	0.143557	0.215664	0.0836368	0.198436	0.165472
3010003L21Rik	6;6;6;6;6;6;6	148944867;148944867;148945236;148945424;148945458;148946937;148946937	148946420;148945231;148945421;148945453;148946420;148947121;148947129	+;+;+;+;+;+;+	1747	2.09349	2.13191	2.25938	1.6002	1.46268	1.99876	2.38184	1.25252	1.81559	1.34509	1.55043	1.3064	1.16965
3010026O09Rik	11;11;11;11;11;11;11;11;11;11;11;11;11;11;11;11	50174444;50174849;50174907;50176827;50176827;50176827;50177676;50182492;50182492;50187544;50194208;50194208;50196944;50196944;50197619;50199536	50174547;50174951;50174951;50176886;50176886;50176886;50178348;50182580;50182580;50187663;50194283;50194283;50197024;50197092;50197703;50200115	+;+;+;+;+;+;+;+;+;+;+;+;+;+;+;+	2039	2.33518	1.64268	1.63185	1.38461	1.688	1.683	1.0146	2.46193	2.42927	2.497	2.43333	4.1827	2.35799
3100002H09Rik	4	124609931	124610803	-	873	0.079045	0	0.0747329	0.190231	0	0	0	0	0	0	0	0	0
3100003L05Rik	7;7;7;7	124625670;124626948;124628313;124708764	124625808;124627203;124628409;124708935	-;-;-;-	664	0	0	0	0	0	0	0	0	0	0	0	0	0
3110001I22Rik	16;16	13671929;13676834	13672078;13678405	+;+	1722	4.34796	3.3162	2.95521	4.00232	5.17855	4.16045	3.47985	5.25099	4.44087	4.29286	4.85113	4.95269	5.53179
3110002H16Rik	18;18;18;18;18;18;18;18;18;18;18;18;18;18;18;18;18;18;18;18;18;18;18;18;18;18;18;18;18;18;18;18;18;18;18;18;18;18;18;18;18;18;18;18;18;18;18;18;18;18;18;18;18;18;18;18;18;18;18;18;18;18;18;18;18;18;18;18;18;18;18;18;18;18;18;18;18;18;18;18;18;18;18	12168717;12168717;12168739;12168752;12169233;12169233;12169233;12171549;12171549;12171549;12171549;12176137;12176137;12176137;12176137;12178188;12178188;12178188;12178188;12179113;12179113;12179113;12179113;12179489;12179489;12179489;12179489;12179570;12180485;12180485;12180485;12180485;12180485;12180525;12180666;12180666;12180666;12180666;12180666;12181584;12181584;12181584;12181584;12183979;121…	12168902;12168902;12168902;12168902;12169309;12169309;12169309;12171633;12171633;12171633;12171633;12176193;12176193;12176193;12176193;12178274;12178274;12178274;12178274;12179253;12179253;12179253;12179253;12179592;12179592;12179592;12179592;12179592;12180574;12180574;12180571;12180574;12180574;12180574;12180771;12180771;12180771;12180771;12181116;12181695;12181695;12181695;12181695;12184023;121…	+;+;+;+;+;+;+;+;+;+;+;+;+;+;+;+;+;+;+;+;+;+;+;+;+;+;+;+;+;+;+;+;+;+;+;+;+;+;+;+;+;+;+;+;+;+;+;+;+;+;+;+;+;+;+;+;+;+;+;+;+;+;+;+;+;+;+;+;+;+;+;+;+;+;+;+;+;+;+;+;+;+;+	5768	8.64373	8.25818	8.29662	8.72876	8.51668	9.99401	9.2696	4.54117	3.99245	3.88725	6.24952	9.43385	11.3989
3110004A20Rik	11;11	40474718;40475540	40474964;40475677	-;-	385	0	0	0	0	0	0	0	0	0	0	0	0	0
3110009E18Rik	1;1;1;1;1;1;1;1;1;1;1;1;1;1;1;1;1;1;1;1;1;1;1;1;1;1;1;1	120121187;120121195;120121200;120150599;120150603;120150603;120150603;120150671;120160480;120160606;120160606;120160606;120160606;120160606;120164765;120165349;120166135;120166135;120166135;120166135;120166135;120169041;120171401;120171401;120173058;120188041;120188041;120188041	120121810;120121217;120121217;120150747;120150747;120150747;120150747;120150747;120160656;120160656;120160656;120160656;120160656;120160656;120164882;120165459;120166172;120166172;120166172;120166172;120166172;120169511;120171482;120171482;120173566;120188189;120188189;120188189	+;+;+;+;+;+;+;+;+;+;+;+;+;+;+;+;+;+;+;+;+;+;+;+;+;+;+;+	2428	0.767368	1.01766	0.832989	0.50159	0.536953	0.545507	0.822666	0.265063	0.178953	0.120978	0.396184	0.519465	0.222774
3110018I06Rik	12	107488632	107489636	+	1005	0	0	0	0	0	0	0	0	0	0	0	0	0
3110021N24Rik	4;4;4;4	108719649;108723807;108727456;108780453	108719812;108723912;108727545;108781904	+;+;+;+	1812	4.9127	5.60601	4.54857	3.46228	3.07943	5.59845	4.64556	3.6938	2.92543	3.51227	3.63226	3.31457	2.68656
3110031N09Rik	5	69556557	69556882	-	326	0	0	0	0	0	0	0	0.0987077	0	0	0.465903	0	0
3110035E14Rik	1;1;1;1;1;1	9601199;9606974;9613312;9619836;9622593;9624713	9601650;9607029;9613474;9619897;9622684;9627143	+;+;+;+;+;+	3256	0.360291	0.539642	0.54101	0.272026	0.288292	0.526971	0.7011	0.0988289	0.106756	0.210497	0.18659	0.387365	0.18458
3110039M20Rik	12;12;12;12;12	49389652;49390403;49390659;49406849;49406849	49389939;49390470;49390755;49407138;49407360	+;+;+;+;+	965	0	0	0	0	0	0	0	0	0	0	0	0	0
3110040N11Rik	7;7;7;7;7;7;7;7;7;7;7;7;7;7;7;7;7;7;7;7	81782182;81783031;81783031;81783031;81783050;81783104;81786077;81786077;81786077;81786077;81786077;81788450;81788450;81788450;81788450;81788450;81788957;81789252;81789355;81789428	81782581;81783138;81783138;81783138;81783138;81783138;81786204;81786204;81786204;81786204;81786204;81788576;81788576;81788576;81788664;81788576;81789109;81789465;81789478;81789469	-;-;-;-;-;-;-;-;-;-;-;-;-;-;-;-;-;-;-;-	1231	3.1392	4.28207	3.65694	4.09222	3.96094	4.35269	3.88268	2.66631	3.38845	1.90891	4.40066	4.58623	3.41751
3110043O21Rik	4;4;4;4;4;4;4;4;4;4;4;4;4;4;4;4;4;4;4;4;4;4;4;4;4;4;4;4;4;4;4;4;4;4;4;4;4;4;4;4;4;4;4	35191285;35191287;35191287;35193185;35193185;35194137;35194137;35194137;35196973;35196973;35196973;35197044;35205768;35205768;35205768;35205768;35211292;35211292;35211292;35212423;35213009;35213009;35213009;35213549;35213549;35213549;35213549;35217213;35217213;35217213;35217213;35218409;35218414;35218414;35218414;35218593;35221881;35225788;35225788;35225929;35225929;35225929;35226116	35193294;35193068;35193068;35193294;35193294;35194194;35194194;35194194;35197208;35197208;35197208;35197208;35206130;35205884;35205884;35205884;35211364;35211364;35211364;35213073;35213073;35213073;35213073;35213644;35213644;35213644;35213644;35217272;35217272;35217272;35217272;35218916;35218916;35218916;35218916;35218916;35222088;35225880;35225834;35226123;35226123;35226123;35226175	-;-;-;-;-;-;-;-;-;-;-;-;-;-;-;-;-;-;-;-;-;-;-;-;-;-;-;-;-;-;-;-;-;-;-;-;-;-;-;-;-;-;-	4603	3.46306	3.05379	3.38753	6.44012	5.03022	4.70855	4.10695	10.4722	20.6347	15.1663	5.98343	9.81864	11.9663
3110045C21Rik	1;1;1;1;1;1	169969409;169969452;169970450;169970470;169971782;169971782	169969575;169969575;169970802;169970802;169972396;169972370	+;+;+;+;+;+	1135	0.547186	0.725664	0.804745	0.682822	0.275677	0.954779	1.19419	0.45362	0.153127	0.172531	0.713701	0.687913	1.05902
3110053B16Rik	12;12;12;12;12;12;12;12;12;12;12	20874125;20875128;20875640;20876427;20876698;20876750;20914759;20915748;20920842;20920842;20920842	20874219;20875233;20877095;20877095;20877071;20877038;20914841;20915791;20921053;20921228;20921262	-;-;-;-;-;-;-;-;-;-;-	2205	1.17358	0.867331	1.02079	0.778267	0.863235	0.655283	0.614695	2.08687	1.7045	1.48754	1.25135	0.73543	0.749538
3110056K07Rik	12;12;12;12;12;12;12	70991615;71009795;71010341;71014456;71014456;71015507;71015507	70992055;71010479;71010479;71014507;71014507;71015596;71015832	-;-;-;-;-;-;-	1504	5.13876	5.6953	6.07304	5.11614	5.02765	7.32537	7.16215	3.2521	4.21787	4.29664	4.00582	6.42931	8.27165
3110062G12Rik	1	176745564	176746982	-	1419	0.291781	0.464343	0.459773	0.858253	0.183752	1.10311	1.20654	0.136062	0.0612401	0.414001	0.321109	0.211628	1.18589
3110062M04Rik	6;6;6;6;6;6;6;6;6;6;6;6;6;6;6;6;6	34871771;34871840;34873695;34874646;34875346;34875456;34875537;34875537;34875537;34876539;34876539;34876539;34876539;34876539;34877575;34877900;34877900	34874695;34874695;34874695;34874695;34875612;34875612;34875612;34875612;34875612;34877129;34876771;34876980;34876771;34876771;34878021;34878009;34878060	-;-;-;-;-;-;-;-;-;-;-;-;-;-;-;-;-	4269	15.9382	17.8462	17.2695	24.5341	24.0772	17.1629	17.7381	28.8998	21.3534	19.2887	28.1959	30.431	32.8442
3110067C02Rik	X;X	150463726;150466036	150465721;150466156	+;+	2117	0.456348	0.337181	0.0616361	0.0522979	0.418767	0.54033	0.303275	0.304003	0.28734	0.41625	0.263066	0.170222	0.369056
3110070M22Rik	13	119487261	119488383	-	1123	0.67593	0.586734	0.232384	0.221824	0.348278	0.750541	0.317618	0.286542	0.386909	0.217968	0.653703	0.775486	0.294342
3110079O15Rik	1;1;1;1;1;1	87470271;87472539;87475023;87475023;87475329;87475329	87470411;87472782;87475205;87475205;87475482;87475458	+;+;+;+;+;+	722	0.669036	0.684456	0.451813	0.383361	0.288913	0.333541	0.296414	0.178275	0.361079	0.271222	0.140244	0.166371	0
3110080E11Rik	8	16912706	16916182	-	3477	0.0198465	0.110544	0.131347	0.063684	0.0299965	0.0692598	0.123101	0.0370189	0	0.0563194	0.232974	0.155462	0.449406
3110080O07Rik	3	51829385	51830405	-	1021	5.06902	4.84013	4.6008	3.57844	2.91135	6.7221	5.37996	1.44977	2.12781	2.01385	3.7686	3.64714	5.29769
3110082I17Rik	5;5;5;5;5;5;5;5;5;5;5;5;5;5;5	139359739;139359739;139361307;139363651;139363973;139363973;139414883;139415623;139455417;139455417;139455417;139455417;139460469;139460469;139460469	139360730;139361388;139361388;139364163;139364163;139364163;139415242;139415795;139455530;139455546;139455546;139455546;139460527;139460511;139460502	-;-;-;-;-;-;-;-;-;-;-;-;-;-;-	2885	2.3919	2.22679	1.62822	2.34093	2.38294	2.38938	2.05233	2.81076	3.93082	2.78292	4.29945	6.08574	3.19766
3110082J24Rik	5;5;5;5;5	30103584;30103889;30105063;30105063;30106007	30103918;30103918;30105414;30105359;30106086	-;-;-;-;-	767	0	0	0	0	0	0	0	0	0	0	0	0.0783052	0
3110083C13Rik	14;14	57999323;58002980	57999462;58003695	+;+	856	0.806148	1.66778	0.914605	0.776038	0.548294	1.19564	0.6667	0.150368	0	0	0.23658	0.280655	0.351048
3110099E03Rik	2;2;2;2;2;2;2;2;2;2	115493513;115495026;115495731;115497721;115497721;115497721;115502481;115512139;115512139;115527703	115496007;115496043;115496007;115497882;115497806;115497882;115502611;115512207;115512201;115527744	-;-;-;-;-;-;-;-;-;-	2935	0	0	0	0	0	0	0	0	0	0	0	0	0
3222401L13Rik	18;18	37655451;37655907	37661742;37658737	+;+	6292	2.32507	1.87625	2.03751	0.624662	0.518008	1.38263	1.51925	0.296625	0.200262	0.202296	0.523018	0.477273	0.549223
3300002A11Rik	12;12;12;12;12;12;12	99341154;99346398;99347083;99361351;99361351;99361629;99361629	99341225;99346457;99347330;99361497;99361497;99361827;99361827	+;+;+;+;+;+;+	726	20.5308	24.2021	8.26756	8.15873	3.95067	17.9949	9.03994	3.27992	11.4909	14.1607	9.69327	11.4991	3.22848
3300002I08Rik	2;2;2;2;2;2;2;2;2;2;2;2;2;2;2	150310935;150310937;150342836;150343244;150344309;150344309;150344580;150344580;150344580;150344580;150360111;150362588;150362588;150362588;150362588	150311218;150311218;150343155;150344369;150344369;150344369;150344706;150344706;150344706;150344706;150360192;150362742;150362744;150362733;150362765	-;-;-;-;-;-;-;-;-;-;-;-;-;-;-	2117	2.75438	2.04902	2.11104	1.70831	1.46569	2.76791	2.07238	1.56561	0.513107	0.74	1.45882	1.76833	2.00142
3300002P13Rik	7;7	3421665;3423274	3422584;3423445	-;-	1092	0.0631926	0	0	0	0	0.110264	0.0653269	0	0	0	0	0.0550001	0
3300005D01Rik	17;17;17;17;17;17;17;17;17;17	5798657;5798699;5799491;5799652;5801199;5801199;5802713;5802713;5802713;5802713	5798760;5798862;5799993;5799993;5801341;5801341;5802894;5802893;5803240;5803048	+;+;+;+;+;+;+;+;+;+	1380	0	0.119366	0.0472767	0.280798	0.264523	0.261757	0	0.0466358	0.0629708	0.212851	0.220122	0.0870436	0.479053
3425401B19Rik	14;14;14;14	32659119;32667817;32668357;32685003	32664178;32667939;32668450;32685272	-;-;-;-	5547	0.311007	0.425648	0.223471	0.189614	0.225631	0.466698	0.29579	0.243646	0.673641	0.644269	0.282941	0.17324	0.270864
3632451O06Rik	14;14;14;14;14;14;14;14;14;14;14;14;14;14;14;14;14;14	49681560;49681668;49682612;49682612;49689267;49689267;49728889;49751419;49751419;49751419;49768409;49768409;49770379;49770379;49772862;49772862;49783268;49783268	49682416;49682413;49682746;49682746;49689298;49689298;49729328;49751547;49751682;49751682;49768600;49768600;49770627;49770627;49774239;49774239;49783371;49783383	-;-;-;-;-;-;-;-;-;-;-;-;-;-;-;-;-;-	3663	2.18529	1.15423	1.42488	0.982317	0.377271	0.838222	1.03217	0.263544	0.308407	0.133649	0.0414645	0.22955	0.131257
3632454L22Rik	X;X;X;X;X;X;X;X;X;X	135022734;135023533;135027906;135029869;135029869;135029869;135036014;135036014;135059915;135060070	135025294;135025433;135029032;135030044;135030044;135030044;135036602;135036148;135059979;135060336	-;-;-;-;-;-;-;-;-;-	4924	0.308314	0.36799	0.437242	0.146151	0.148271	0.29344	0.36219	0.601227	0.317668	0.357921	0.400995	0.365923	0.329546
3830403N18Rik	X;X;X;X;X;X;X;X	56136572;56137971;56138411;56138745;56147076;56147888;56152655;56153073	56136625;56138096;56138474;56138779;56147193;56147987;56152753;56153498	+;+;+;+;+;+;+;+	1022	0	0.0537266	0	0.270829	0.204105	0.294541	0.209404	0.062972	0	0.670625	0.321999	0.528905	0.176417
3830406C13Rik	14;14;14;14;14;14;14;14;14;14;14	12284209;12284209;12285385;12285385;12287270;12287270;12297582;12297582;12299722;12301148;12301148	12284257;12284257;12285468;12285468;12287393;12287393;12297656;12297656;12299782;12303231;12303231	+;+;+;+;+;+;+;+;+;+;+	2477	10.5446	10.8842	11.9579	9.29141	7.51601	10.8401	11.5343	4.22207	3.12236	3.16225	5.9274	6.17089	9.34124
3830408C21Rik	13	107031963	107033673	+	1711	0.564633	0.256732	0.305047	0.25883	0.182872	0.59817	0.416931	0.0376139	0.101578	0.0572246	0.236718	0.210614	0.105376
3830417A13Rik	X;X;X;X;X;X;X;X	64173548;64174348;64175928;64175928;64176792;64176792;64177431;64177431	64173691;64174465;64176013;64176013;64176862;64176862;64178778;64177507	+;+;+;+;+;+;+;+	1767	0	0	0	0	0	0	0	0	0	0	0	0	0
3830422I06Rik	3	38418971	38420151	-	1181	0	0	0	0	0	0	0	0	0	0	0	0	0.0508885
3830432H09Rik	1;1;1;1;1;1	119529480;119530293;119534978;119534978;119535762;119536063	119531596;119531596;119535245;119535022;119535910;119536165	-;-;-;-;-;-	2637	0.706549	0.395625	0.296891	0.209925	0.632827	0.388119	0.270523	0.170839	0.296586	0.222779	0.307186	0.318863	0.205117
3930402G23Rik	8;8;8;8;8;8;8	10924427;10926917;10927285;10928020;10928020;10928269;10928269	10926995;10926995;10927521;10928108;10928108;10928696;10928444	-;-;-;-;-;-;-	3323	0.49839	0.264381	0.294501	0.249883	0.0941599	0.108704	0.107338	0.290509	0.470718	0.294647	0.2133	0.361481	0.144687
4430402I18Rik	19;19;19;19;19;19;19;19;19;19;19;19;19;19;19;19;19;19;19;19;19;19;19;19;19;19;19;19;19;19;19;19;19;19;19;19;19;19;19;19;19;19;19;19;19;19;19;19;19;19;19;19;19;19;19;19;19;19;19;19;19;19;19;19;19;19;19;19;19;19;19;19;19;19;19;19;19;19	28893042;28896081;28897505;28901268;28901442;28902686;28904609;28905331;28909431;28911654;28923064;28923530;28923533;28923567;28923688;28923688;28927649;28927649;28927649;28927649;28927649;28927649;28928548;28928548;28928548;28928548;28928548;28928548;28929125;28938232;28938232;28938232;28938232;28938232;28939135;28939135;28939135;28939135;28939135;28941712;28941712;28941712;28941712;28941712;289…	28894565;28896124;28897602;28901718;28901626;28902790;28904732;28905527;28909565;28911879;28923702;28923702;28923702;28923702;28923702;28923702;28927750;28927750;28927750;28927750;28927750;28927750;28928632;28928632;28928632;28928632;28928632;28928632;28929227;28938419;28938419;28938419;28938419;28938419;28939169;28939169;28939169;28939169;28939169;28941814;28941814;28941814;28941814;28941814;289…	-;-;-;-;-;-;-;-;-;-;-;-;-;-;-;-;-;-;-;-;-;-;-;-;-;-;-;-;-;-;-;-;-;-;-;-;-;-;-;-;-;-;-;-;-;-;-;-;-;-;-;-;-;-;-;-;-;-;-;-;-;-;-;-;-;-;-;-;-;-;-;-;-;-;-;-;-;-	5420	4.37973	5.75932	3.71349	2.62488	1.78961	4.47088	3.58001	4.03718	7.28707	9.46596	3.42814	2.28827	2.16225
4631405J19Rik	2;2;2;2;2;2;2;2;2;2;2;2;2;2;2;2;2;2;2;2;2;2;2;2;2	93027956;93027956;93029348;93029349;93030138;93030138;93030138;93030143;93030395;93030395;93030398;93030398;93030444;93030876;93030876;93031466;93031466;93031466;93031466;93033010;93033010;93033010;93033010;93039676;93044269	93029651;93029647;93029647;93029647;93030174;93030174;93030174;93030174;93030955;93030955;93030559;93030559;93030559;93030955;93030955;93031709;93031681;93031681;93031681;93033239;93033412;93033439;93033412;93039801;93044732	+;+;+;+;+;+;+;+;+;+;+;+;+;+;+;+;+;+;+;+;+;+;+;+;+	3558	1.04731	1.35805	1.11854	0.622342	0.791467	1.20137	1.18293	1.77263	1.441	1.70615	2.40477	1.46859	0.929023
4631405K08Rik	1;1	193507238;193509725	193508899;193510174	-;-	2112	0.0326734	0.0779951	0.123564	0	0	0.142529	0	0.0304722	0	0	0	0.0853126	0
4632404H12Rik	3;3;3	89767511;89768121;89772502	89769562;89772791;89773240	-;-;-	5730	1.61978	1.98361	1.41187	1.42016	1.31055	1.8492	1.74919	0.797448	0.925111	0.683499	1.59041	1.72948	1.86696
4632404M16Rik	3	102134615	102137496	+	2882	0.454934	0.247679	0.135826	0.0960398	0.0361894	0.167118	0.0990103	0.223308	0.241221	0.339734	0.263505	0.208397	0.0625601
4632411P08Rik	5;5	29378699;29388765	29380211;29390488	+;+	3237	0.170544	0.30533	0.12093	0.0855072	0.0966615	0.130191	0.0881519	0.178936	0.0805373	0.211733	0.312809	0.296868	0.129965
4632415L05Rik	3;3	19894886;19894898	19895962;19898984	+;+	4099	3.12287	3.49625	2.97639	2.25535	2.1628	4.5825	3.42849	2.0097	1.75962	2.05425	2.89021	2.69604	3.05262
4632427E13Rik	7;7;7;7;7;7	92734166;92737637;92737658;92740000;92740706;92741062	92739264;92741468;92741468;92741459;92740976;92741459	-;-;-;-;-;-	7303	5.18752	6.88707	5.64602	3.88858	4.37371	7.95522	6.30047	3.85104	4.36105	6.50909	5.41083	5.1688	7.32006
4632428C04Rik	16;16;16	30008667;30016557;30019152	30008730;30016643;30021430	+;+;+	2430	2.3854	2.14663	2.14788	1.79968	2.66109	1.65995	1.70269	0.979927	1.14436	0.362634	0.479197	0.519038	0.964558
4632432E15Rik	3	10220995	10223433	-	2439	0.278119	0.34512	0.561738	0.0680902	0.128287	0.246839	0.350981	0.0527736	0.0356292	0	0.207578	0.0492498	0.0295692
4633401B06Rik	3	121787500	121788572	-	1073	2.7654	2.20044	2.37133	1.80569	1.45803	3.87147	3.39066	1.91933	1.2958	2.69187	1.7458	1.11948	2.96856
4731419I09Rik	3;3	89337850;89345180	89338017;89347831	+;+	2820	10.3142	12.9872	12.9327	21.2203	19.5558	15.478	12.5093	13.5333	9.02894	8.50647	13.842	13.4177	15.4937
4732414G09Rik	11;11;11;11;11	73015856;73015856;73016448;73018657;73018657	73016049;73018092;73016513;73018804;73018841	-;-;-;-;-	2422	0.427372	0.181366	0.269372	0.022856	0.064594	0.273429	0.147269	0.13286	0.0358793	0.121277	0.146324	0.32237	0.12407
4732416N19Rik	6	148212253	148215731	+	3479	2.34054	2.90405	2.26912	1.67074	1.49896	2.92455	2.15303	1.83138	1.42377	1.37903	2.16832	1.91626	1.58929
4732419C18Rik	8;8;8	123744631;123747865;123754058	123747368;123747993;123754726	-;-;-	3536	0	0	0.0184508	0.0626214	0.0737399	0.0510781	0.0201745	0.273009	0.491514	0.553797	0.0715896	0.050956	0
4732440D04Rik	1;1;1;1	6209866;6213293;6214233;6214612	6215293;6213347;6214590;6215292	-;-;-;-	5428	4.46227	4.58246	3.49767	2.98815	2.93025	5.26841	4.67869	2.43059	2.67359	2.68769	2.91009	3.65141	4.81636
4732463B04Rik	12;12;12	84039469;84043159;84053496	84041441;84043805;84053807	-;-;-	2932	0.0235356	0.0374547	0.101913	0.094402	0	0.0205335	0.0486609	0.0439	0.148192	0.066788	0.0518024	0	0.0477597
4732465J04Rik	10;10;10;10;10;10;10;10;10;10	95746077;95773520;95778917;95780509;95780509;95783728;95791684;95791684;95794806;95794806	95746232;95773658;95779069;95780626;95780626;95783983;95791732;95791732;95797236;95796831	+;+;+;+;+;+;+;+;+;+	3302	0.229882	0.266062	0.138308	0.486179	0.442207	0.656374	0.280854	0.272866	0.894788	0.56339	0.444645	0.964017	1.18306
4732471J01Rik	7;7;7;7;7;7;7;7;7;7;7;7;7;7;7;7;7;7;7;7;7;7;7	25376819;25376823;25377983;25378386;25383599;25384795;25384805;25385052;25385052;25385463;25385463;25394713;25395414;25396328;25396328;25396690;25396690;25417401;25417401;25438964;25531067;25531291;25565792	25376870;25376870;25378105;25378455;25383737;25384882;25384882;25385300;25385300;25385736;25385573;25395953;25395953;25396389;25396563;25396976;25396906;25417509;25417509;25439538;25531157;25531462;25566417	+;+;+;+;+;+;+;+;+;+;+;+;+;+;+;+;+;+;+;+;+;+;+	4332	5.24078	7.38325	6.04677	6.70243	7.77659	6.51099	5.09667	2.97126	2.80839	4.29435	6.15906	7.79866	5.93086
4732487G21Rik	12;12;12;12	86290761;86293072;86302119;86305721	86292833;86293275;86302219;86306006	-;-;-;-	2664	2.82345	2.74131	3.60006	3.26243	2.44693	3.29947	3.69538	7.58567	7.53523	7.93875	4.84616	3.81012	3.90285
4732490B19Rik	11;11;11;11	113203315;113206390;113208986;113209397	113205167;113206500;113209194;113209669	-;-;-;-	2446	0	0	0.0800186	0.0452636	0	0	0	0.236802	0.106582	0.360262	0.103492	0.0245544	0.0245705
4732491K20Rik	17;17	12318885;12324397	12319172;12327250	+;+	3142	0.483176	0.40194	0.311467	0.229041	0.298752	0.325738	0.408677	0.307244	0.22126	0.373945	0.2417	0.210268	0.286916
4732496C06Rik	7	116546865	116549364	+	2500	2.67744	2.39401	1.95726	1.61643	1.33501	2.72123	2.14011	1.62181	1.84227	2.38903	2.3694	2.09009	2.52417
4831440E17Rik	5;5	25499067;25500577	25499129;25501541	+;+	1028	1.14115	1.2285	1.01544	0.484646	0.608742	1.34698	1.24909	0.250418	0.338131	0.190489	0.246246	0.350545	0.584624
4833403J16Rik	6	48755338	48756368	+	1031	3.90411	4.37618	5.3997	2.79203	3.93671	4.97341	5.06278	4.38017	3.84938	2.13676	4.42788	2.85446	2.91461
4833404L02Rik	7	17058534	17059441	+	908	1.29197	1.57227	0.790375	0.243865	0.114865	1.39239	0.628519	0.141756	0.478523	0.107832	1.78425	0.859891	0.860453
4833407H14Rik	19;19	53460631;53461716	53461107;53462723	+;+	1485	0.464689	1.29414	1.18622	3.57866	4.03846	1.86491	1.39311	12.5248	28.557	17.1427	11.711	33.5689	17.3823
4833411C07Rik	8;8;8;8;8;8;8	10899922;10899937;10900265;10900265;10901605;10901605;10902968	10900151;10900151;10900506;10900506;10902463;10901789;10903893	+;+;+;+;+;+;+	2257	0.886656	0.437906	0.49141	0.392431	0.323475	0.85358	0.284463	0.31366	0.346521	0.347049	0.358906	0.319327	0.26628
4833412C05Rik	7;7;7;7;7;7;7	67784538;67784951;67786399;67786399;67788454;67803365;67803923	67785292;67785292;67786594;67786594;67788548;67803496;67804139	-;-;-;-;-;-;-	1395	0.247334	0.196805	0.140305	0.0396827	0	0.129471	0.0511376	0.32294	0.0622937	0.140375	0.254048	0.0430538	0.043082
4833412K13Rik	1	78465448	78466926	-	1479	1.16643	1.81915	1.58804	1.34744	1.26934	2.11671	1.63993	1.26191	1.9977	2.11843	1.78003	1.27917	1.62541
4833413E03Rik	17;17;17;17;17;17;17	31557126;31557126;31557613;31558192;31558685;31558685;31558685	31557791;31557611;31557791;31558469;31559113;31559110;31559110	+;+;+;+;+;+;+	1373	0	0.319933	0.142553	0.201593	0.0759634	0.0876972	0.207828	0.140621	0.253167	0.427871	0.258119	0.174975	0.262634
4833413G10Rik	5	3629777	3631722	-	1946	3.2801	4.24653	4.34163	1.9486	1.72847	4.74888	3.86744	1.48822	1.80855	1.40879	2.09433	1.82094	2.19273
4833417C18Rik	11;11	95858865;95859994	95859082;95861044	+;+	1269	0.70692	0.692307	0.719768	0.654342	0.452039	0.66419	0.730796	0.659296	0.136958	0.0771562	0.159584	0.331301	0.899833
4833418N02Rik	17;17;17;17;17;17;17;17;17;17;17;17;17;17;17	87274886;87274921;87275247;87276446;87276446;87276446;87277412;87277412;87277412;87280258;87280559;87280559;87282174;87282174;87282174	87275370;87275370;87275370;87276474;87276474;87276474;87277582;87277582;87277582;87281021;87281693;87280762;87282500;87282779;87282814	-;-;-;-;-;-;-;-;-;-;-;-;-;-;-	2762	1.92378	1.75222	1.89749	1.28272	1.30278	1.96176	1.21392	2.19029	1.76191	2.37511	1.998	1.91662	1.65371
4833418N17Rik	7;7	81992002;81992481	81992478;81992618	+;+	615	0.785437	0.0892822	0.424337	0.360048	0.33918	0.489464	0.579975	0.209292	0	0	0.164644	0.292976	0.195445
4833420G17Rik	13;13;13;13;13;13;13;13;13;13;13;13;13	119462759;119466011;119466867;119469515;119472139;119473833;119474833;119475937;119477684;119479428;119480935;119484453;119485727	119463119;119466304;119466956;119470161;119472240;119473956;119474924;119476006;119477854;119479522;119481030;119484493;119486117	+;+;+;+;+;+;+;+;+;+;+;+;+	2574	16.3937	13.7165	12.876	11.9898	11.5684	17.4017	14.6609	9.67611	7.32605	8.44456	12.067	12.6234	11.4408
4833421G17Rik	1	87865073	87865916	+	844	1.14465	1.56138	2.00982	1.2462	1.42112	3.1386	1.77497	0.610023	0.617771	1.3921	1.43966	1.13858	1.28174
4833421K07Rik	7	55088597	55089987	+	1391	0	0	0	0	0	0	0	0	0	0	0	0	0
4833422C13Rik	13;13;13;13;13;13	91701665;91707904;91713308;91741422;91741422;91741422	91704041;91709314;91714983;91741872;91741828;91741776	-;-;-;-;-;-	5915	1.31829	1.31818	1.11402	0.636399	0.652412	1.51655	0.976888	0.478736	0.528891	0.811099	0.83881	0.467078	1.12782
4833422M21Rik	15;15;15;15;15;15;15;15	96231870;96231870;96240370;96248958;96253864;96253864;96254464;96254464	96232874;96232874;96240588;96251075;96254002;96254002;96254616;96254684	-;-;-;-;-;-;-;-	3702	0.0745611	0.118657	0.123364	0	0.0281733	0.0650503	0.0578095	0	0.0234737	0.105793	0.0273518	0	0.0162343
4833423E24Rik	2;2;2;2;2;2;2;2;2;2;2;2	85483594;85485430;85486981;85488748;85490346;85490669;85493251;85494105;85500212;85502031;85508344;85518428	85484192;85485555;85487060;85488844;85490443;85490745;85493311;85494230;85500313;85502228;85508454;85519024	-;-;-;-;-;-;-;-;-;-;-;-	2272	0	0.0241675	0.0287156	0	0	0.317979	0.0627966	0	0	0	0	0	0
4833427F10Rik	17;17;17	35772450;35776876;35780023	35772911;35777223;35780687	+;+;+	1475	0.0935678	0.297809	0.132695	0.225182	0.212131	0.0408163	0.193456	0.479953	0.294575	0.265522	0.480539	0.366468	0.244472
4833427G06Rik	9;9;9;9;9;9	51081115;51083579;51086114;51100000;51101054;51101745	51081530;51083631;51086173;51100070;51101092;51102078	-;-;-;-;-;-	973	6.80843	14.6159	4.62661	3.35671	2.51901	7.73434	2.93266	0.39686	2.23278	3.72324	5.25534	2.99375	1.42064
4833428L15Rik	9;9;9;9;9;9;9;9	45416626;45418829;45419857;45421660;45430511;45431145;45431145;45431344	45417395;45419004;45419983;45421757;45430657;45431232;45431251;45431730	-;-;-;-;-;-;-;-	1812	0.0380829	0.303027	0.0720109	0.0305504	0	0.199351	0	0.106552	0.959158	2.05333	0.0279405	0.0331457	0
4833439L19Rik	13;13;13;13;13;13;13;13;13;13;13;13;13;13;13;13;13;13;13;13;13;13;13;13;13;13;13;13;13;13;13;13;13;13;13;13;13;13;13;13;13;13;13;13;13;13;13	54551218;54551223;54552396;54552898;54552898;54552898;54553198;54553198;54553198;54556194;54556368;54556527;54556527;54556527;54556587;54559198;54559198;54559198;54559198;54559198;54561571;54561693;54561693;54561693;54561693;54561693;54561693;54561708;54564185;54564185;54564185;54564185;54564510;54564510;54564515;54564515;54564515;54564515;54565182;54565182;54565182;54565182;54565182;54565182;545…	54552817;54552817;54552817;54553037;54553037;54553037;54553304;54553304;54553304;54556651;54556651;54556651;54556651;54556651;54556651;54559324;54559324;54559324;54559324;54559324;54561871;54561871;54561871;54561871;54561871;54561871;54561871;54561871;54564272;54564272;54564272;54564272;54564621;54564621;54564621;54564621;54564621;54564621;54565356;54565344;54565325;54565330;54565338;54565291;545…	-;-;-;-;-;-;-;-;-;-;-;-;-;-;-;-;-;-;-;-;-;-;-;-;-;-;-;-;-;-;-;-;-;-;-;-;-;-;-;-;-;-;-;-;-;-;-	3187	24.857	27.5835	28.2094	20.974	16.6412	23.0842	26.0211	19.8201	14.3833	14.1629	24.7899	22.5673	18.6125
4833445I07Rik	9;9;9	108567533;108567893;108568484	108569174;108568180;108568774	+;+;+	1642	0.987605	1.07008	0.75493	1.16311	1.47681	1.20995	0.608232	0.764293	1.40246	2.08702	1.51083	1.17048	1.02484
4921501E09Rik	17	33064143	33068058	-	3916	0	0	0	0	0	0	0	0	0	0	0	0	0
4921504A21Rik	5;5;5;5;5;5;5	19202368;19203293;19207085;19210228;19210228;19226141;19226141	19203925;19203925;19207172;19210322;19210322;19226168;19226555	-;-;-;-;-;-;-	2156	0.448093	0.534824	0.181564	0.154056	0.120939	0.167544	0.132351	0.208953	0.20153	0.0908267	0.140895	0.139286	0.0278754
4921504E06Rik	2;2;2;2;2;2;2;2;2;2;2;2;2;2;2;2;2;2;2;2;2;2;2;2;2;2;2	19462837;19475559;19475692;19477786;19480374;19480515;19480921;19493699;19493984;19495057;19495057;19511782;19511782;19516255;19516255;19517536;19517536;19523966;19523966;19533762;19533762;19540269;19540269;19542375;19542375;19553774;19553774	19463186;19475607;19475772;19477873;19480439;19480594;19480983;19494232;19494232;19495128;19495128;19511847;19511847;19516313;19516313;19517683;19517683;19524121;19524121;19533836;19533836;19540412;19540412;19542495;19542495;19553914;19553914	-;-;-;-;-;-;-;-;-;-;-;-;-;-;-;-;-;-;-;-;-;-;-;-;-;-;-	2293	0.0300943	0.0478923	0	0	0	0.0787668	0.0933322	0	0	0	0	0.0261928	0.0262099
4921507G05Rik	12;12	110841029;110842409	110841285;110843804	+;+	1653	0.0834922	0.166088	0.0394688	0.133956	0.094644	0.0728422	0.043156	0.0778674	0	0.0592324	0.15314	0.072668	0.0363577
4921507P07Rik	6;6;6;6;6;6;6;6;6;6	50573302;50577421;50577791;50583930;50584343;50587178;50589111;50591637;50595798;50596443	50574516;50577512;50577965;50584018;50584524;50587207;50589182;50591813;50595953;50596632	-;-;-;-;-;-;-;-;-;-	2378	1.2478	0.923609	0.68589	0.279347	0.263157	0.987367	0.959959	0.324764	0.401975	0.535259	0.681287	0.707184	0.379096
4921508D12Rik	2;2;2;2	132424741;132445498;132447800;132451978	132424865;132445662;132448062;132452499	+;+;+;+	1075	0	0	0	0	0	0	0	0.0598673	0	0	0	0	0
4921508M14Rik	12	34873730	34874828	-	1099	0.43953	0.249811	0.296824	0.302224	0.0949024	0.219123	0.389465	0.17568	0.316287	0.534547	0.414607	0.382548	0.437484
4921509A06Rik	9;9	78629374;78629999	78629635;78630128	-;-	392	0	0	0	0.282435	0	0.153582	0	0	0	0	0	0	0
4921509C19Rik	2;2;2;2	151470542;151471283;151471868;151475989	151471053;151471356;151473800;151476153	-;-;-;-	2684	0	0	0.0243077	0	0	0	0	0	0	0	0	0	0
4921511C10Rik	3;3;3	79212919;79248177;79253474	79213556;79248561;79253913	+;+;+	1463	3.72624	2.70227	2.80946	2.87571	3.17242	3.539	2.43804	1.49566	1.96014	1.40542	1.7995	2.66843	2.54693
4921511C20Rik	X	127394293	127395898	+	1606	0	0	0	0	0	0	0	0	0	0	0	0	0
4921511E07Rik	1	16930970	16931796	+	827	0	0	0	0	0	0	0	0	0	0	0	0	0
4921511H03Rik	5;5;5;5;5;5;5;5	7304119;7304125;7304132;7304146;7304457;7304756;7304756;7311324	7304491;7304194;7304194;7304194;7305809;7307573;7305602;7311491	+;+;+;+;+;+;+;+	3623	0.0190467	0	0.0180077	0.0152794	0	0.0166172	0.01969	0	0	0.0270249	0	0.0165774	0
4921511M17Rik	X;X;X;X;X	154022780;154022780;154032423;154032423;154033759	154023584;154023584;154032451;154032532;154033827	-;-;-;-;-	984	0	0	0	0	0	0	0	0	0	0	0	0	0
4921513D11Rik	17;17	79626677;79627462	79626802;79628681	+;+	1346	6.61353	5.46638	4.09579	2.69384	2.01467	4.89773	5.19392	1.98427	0.645615	0.654681	1.3729	1.6956	2.36647
4921513I03Rik	10;10;10	120765774;120770915;120777635	120765838;120771131;120778886	+;+;+	1534	1.79938	0.787476	1.02073	0.829999	0.577921	1.13815	1.39512	1.5523	1.58618	1.21272	1.25415	0.743899	0.352604
4921513I08Rik	7;7	78254296;78254828	78254567;78255421	+;+	866	0	0	0.075337	0	0	0	0	0	0	0	0	0	0
4921514A10Rik	4;4;4;4;4	141115660;141115660;141116281;141116281;141116455	141115968;141115968;141118087;141116452;141118087	+;+;+;+;+	2116	7.43546	5.94237	5.79654	8.68556	8.30537	4.77991	5.25924	6.18938	6.73514	5.32126	5.76625	7.12433	6.24852
4921515E04Rik	15;15;15;15;15	18078137;18080129;18081989;18165132;18165768	18078288;18080242;18082118;18165312;18165988	-;-;-;-;-	798	0	0	0	0	0	0	0	0	0	0	0	0	0
4921517D22Rik	13;13;13;13;13	59687402;59690449;59691558;59693385;59694037	59689701;59690944;59691656;59693566;59694101	-;-;-;-;-	3142	0	0	0	0	0	0	0	0	0	0	0	0	0
4921518K17Rik	12;12;12;12;12	57585975;57587347;57592881;57617359;57618439	57586198;57589940;57593136;57617510;57618602	-;-;-;-;-	3390	0.936368	1.725	0.981515	0.42457	0.307663	0.887966	1.05217	0.588519	0.948463	1.15529	0.433102	0.372054	0.248198
4921521D15Rik	3;3	117969130;117973303	117970832;117973526	+;+	1927	0	0	0	0	0	0	0	0	0	0	0	0	0
4921522P10Rik	8;8	8661801;8662995	8662167;8664728	+;+	2101	1.478	1.30672	1.18	0.948531	1.24105	1.06023	1.01861	0.673899	1.07539	0.885442	1.25305	0.914766	0.715128
4921523L03Rik	9;9	107991684;107995532	107992744;107995656	-;-	1186	2.38555	7.63905	1.32024	5.60108	1.9347	2.84269	1.08269	2.00778	12.3096	12.3834	4.14075	4.00063	1.3682
4921524J17Rik	8;8;8;8;8;8;8;8;8;8;8	85408759;85409818;85412113;85412113;85412243;85426860;85426860;85427671;85432659;85432659;85432659	85409890;85409890;85412295;85412295;85412295;85426956;85426956;85427762;85432814;85432821;85432833	-;-;-;-;-;-;-;-;-;-;-	1679	4.24682	3.1068	4.35205	3.36298	2.22075	3.65743	5.82082	2.41484	2.6396	1.9244	3.21138	3.38039	3.53473
4921524L21Rik	18;18;18;18;18;18;18;18;18;18	6603633;6619307;6620104;6623466;6623954;6626323;6629481;6630053;6635815;6638599	6603676;6619410;6620245;6623524;6624053;6626531;6629691;6630165;6635944;6638966	+;+;+;+;+;+;+;+;+;+	1480	0	0	0	0	0	0	0	0	0.058716	0	0	0	0
4921527H02Rik	3;3	124398086;124398812	124398331;124399758	-;-	1193	0	0	0	0	0	0	0	0	0	0	0	0	0
4921528I07Rik	9;9;9;9;9;9;9;9;9;9;9;9;9;9;9;9;9;9;9;9;9;9;9;9;9;9;9;9;9;9;9;9;9;9;9;9;9;9;9;9;9;9;9;9;9;9;9;9;9;9;9	114237697;114238889;114240413;114241325;114241613;114242057;114242270;114243530;114244005;114244006;114248528;114248528;114253720;114253720;114254446;114254446;114261204;114261204;114263036;114263036;114263798;114263798;114276663;114276663;114276683;114278563;114279299;114279299;114279299;114282288;114284563;114299977;114299977;114301709;114301709;114302281;114302281;114304583;114304583;114307059…	114237962;114239019;114240469;114241396;114241637;114242097;114242298;114243554;114244073;114244073;114248641;114248641;114253741;114253741;114254507;114254504;114261317;114261317;114263060;114263060;114263829;114263829;114276776;114278587;114278587;114278587;114279369;114279369;114279369;114282355;114284646;114300090;114300090;114301733;114301733;114302351;114302351;114304696;114304696;114307083…	-;-;-;-;-;-;-;-;-;-;-;-;-;-;-;-;-;-;-;-;-;-;-;-;-;-;-;-;-;-;-;-;-;-;-;-;-;-;-;-;-;-;-;-;-;-;-;-;-;-;-	3954	0	0	0	0	0	0.00761306	0	0.0325531	0.0439554	0.0495252	0	0.0151897	0
4921529L05Rik	6;6;6;6;6;6;6;6;6;6;6	53978691;53978701;53978729;53981341;53995798;54009662;54009662;54009712;54009985;54016211;54016211	53978795;53978795;53978795;53981793;53995912;54009786;54009786;54009786;54010086;54018030;54017385	+;+;+;+;+;+;+;+;+;+;+	2720	0	0.020187	0.023986	0.020352	0	0.0221339	0	0.189286	0.191691	0.0359968	0.0186133	0.0220809	0.0220954
4921530L21Rik	14;14	95881266;95881681	95881326;95882775	+;+	1156	0	0	0	0	0	0	0	0	0	0	0	0	0
4921531C22Rik	2;2;2;2	179975993;179976853;179977449;179977449	179976054;179977192;179977987;179979013	+;+;+;+	1967	1.05246	1.24221	0.945294	0.788005	0.556749	1.16307	1.08801	0.817964	0.397609	0.6471	1.19685	0.748079	0.824953
4921534H16Rik	9;9;9;9	98003420;98003420;98004656;98009616	98003697;98003697;98005769;98012175	+;+;+;+	3952	0.401605	0.597436	0.363188	0.224119	0.527823	0.822627	0.86644	0.765384	0.967507	0.743253	1.26827	0.668685	0.410598
4921536K21Rik	11;11;11	3886088;3890039;3894840	3888309;3890147;3895098	-;-;-	2590	0.532867	0.699607	0.251899	0.213735	0.201347	0.371917	0.220346	0.111818	0.16776	0.340232	0.36163	0.255081	0.185635
4921539E11Rik	4;4;4;4;4;4;4;4;4;4;4;4;4;4;4;4;4;4;4;4;4;4;4;4;4;4	103230445;103230445;103235183;103235631;103235631;103235631;103236931;103236931;103236931;103242761;103242761;103242761;103255511;103255511;103255511;103266340;103266340;103266340;103270706;103270706;103270706;103284388;103284388;103290299;103290299;103290299	103231515;103231515;103235488;103235811;103235811;103235811;103237000;103237000;103237000;103242905;103242905;103242905;103255575;103255575;103255575;103266452;103266452;103266452;103270851;103270851;103270851;103284479;103284479;103290863;103290863;103290863	-;-;-;-;-;-;-;-;-;-;-;-;-;-;-;-;-;-;-;-;-;-;-;-;-;-	2754	0.0250567	0.0598132	0.0236899	0	0.0378714	0.0218606	0.025903	0	0	0	0	0.0218083	0.0218226
4921539H07Rik	3;3;3;3	58117053;58162239;58163932;58166277	58117202;58165073;58164256;58167616	+;+;+;+	4325	0	0.0126956	0	0	0	0.01392	0	0.0148803	0	0	0	0	0
4922502D21Rik	6;6;6;6;6;6;6;6	129322164;129322847;129325608;129325624;129326656;129326656;129330948;129331495	129323058;129323285;129325717;129325717;129326843;129326696;129331034;129331796	-;-;-;-;-;-;-;-	1809	0	0	0.0360651	0.0306011	0	0	0	0	0	0	0	0.166004	0.0332224
4922502N22Rik	6;6;6;6	139315597;139316925;139320884;139322504	139316183;139317320;139320976;139322576	-;-;-;-	1149	0	0	0	0	0	0	0	0	0	0	0	0	0
4930401G09Rik	5;5	115358700;115359920	115359132;115360123	-;-	637	0	0	0	0	0.0818664	0	0.111989	0	0	0	0	0	0
4930401O10Rik	11;11;11;11;11	71928471;71933110;71939354;71939573;71939907	71928643;71933183;71939470;71939779;71940122	-;-;-;-;-	787	0	0.0697695	0	0	0	0	0	0	0	0	0	0	0
4930401O12Rik	13;13	31213410;31221890	31213956;31222096	-;-	754	0	0	0.0865277	0	0	0	0	0	0	0	0	0	0
4930402C01Rik	3;3	67570565;67572786	67571191;67572821	-;-	663	0	0	0	0	0	0	0	0	0	0	0	0	0
4930402F06Rik	2;2;2;2;2;2;2;2;2;2;2	35375562;35375582;35380383;35380383;35385619;35385619;35389578;35389578;35390474;35396906;35396906	35376351;35376351;35380526;35380526;35385669;35385669;35389610;35389610;35390557;35397057;35397175	-;-;-;-;-;-;-;-;-;-;-	1372	0	0	0.0475524	0	0	0	0	0.0938154	0	0	0.036901	0.0437756	0.0438042
4930402F11Rik	7;7;7;7;7;7;7;7;7;7;7;7;7;7;7;7;7;7	69496094;69496106;69496117;69496662;69496662;69496662;69498827;69499297;69499297;69500018;69500018;69500096;69518135;69518135;69518135;69518913;69518913;69550545	69496165;69496165;69496165;69496726;69496726;69496726;69499689;69499410;69499410;69500262;69500262;69500262;69518839;69518216;69518498;69519140;69519469;69550673	+;+;+;+;+;+;+;+;+;+;+;+;+;+;+;+;+;+	2636	0	0	0	0	0	0	0	0	0	0	0	0	0
4930402H05Rik	6	91207216	91210044	-	2829	0	0	0	0	0	0	0	0	0	0	0	0	0
4930402H24Rik	2;2;2;2;2;2;2;2;2;2;2;2;2;2;2;2;2;2;2;2;2;2;2;2;2;2;2;2;2;2;2;2;2;2;2;2;2;2;2;2;2;2;2;2;2;2;2;2;2;2;2;2;2;2;2;2;2;2;2;2;2;2;2;2;2;2;2;2;2;2;2;2;2;2;2;2;2;2;2;2;2;2;2;2;2;2;2;2;2;2;2;2;2;2;2;2;2;2;2;2;2;2;2;2;2;2;2;2;2;2;2;2;2;2;2;2;2;2;2;2;2;2;2;2;2;2;2;2;2;2;2;2;2;2;2;2;2;2;2;2;2;2;2;2;2;2;2;2;2;2;2;2;2;2;2;2;2;2;2;2;2;2;2;2;2;2;2;2;2;2;2;2;2;2;2;2;2	130706200;130709130;130709938;130709938;130710812;130710812;130710836;130712260;130712260;130712260;130712304;130712952;130712952;130712952;130712952;130713397;130713397;130713397;130717261;130717261;130717261;130719839;130719840;130719840;130719840;130719840;130727148;130727148;130727148;130727148;130730789;130730789;130730789;130730789;130731053;130736467;130736467;130736521;130737379;130737379…	130709318;130709318;130710031;130710031;130710877;130710877;130710877;130712462;130712462;130712462;130712462;130713026;130713026;130713026;130713026;130713503;130713503;130713503;130717347;130717347;130717347;130719975;130719975;130719929;130719975;130719975;130727185;130727185;130727185;130727185;130730909;130730914;130730914;130730914;130731176;130736625;130736625;130736625;130737467;130737467…	-;-;-;-;-;-;-;-;-;-;-;-;-;-;-;-;-;-;-;-;-;-;-;-;-;-;-;-;-;-;-;-;-;-;-;-;-;-;-;-;-;-;-;-;-;-;-;-;-;-;-;-;-;-;-;-;-;-;-;-;-;-;-;-;-;-;-;-;-;-;-;-;-;-;-;-;-;-;-;-;-;-;-;-;-;-;-;-;-;-;-;-;-;-;-;-;-;-;-;-;-;-;-;-;-;-;-;-;-;-;-;-;-;-;-;-;-;-;-;-;-;-;-;-;-;-;-;-	10659	10.8763	12.3309	11.0358	8.61339	8.50801	10.8784	11.1131	3.19402	3.55866	4.05323	6.018	7.17577	7.50185
4930402K13Rik	X	9104562	9106342	+	1781	0	0	0	0	0	0.0676071	0	0	0	0	0	0	0
4930403D09Rik	11;11	34299707;34307654	34299881;34308113	+;+	635	0.543356	1.03764	0.308229	2.96402	3.53134	2.84429	2.13449	1.52025	2.32645	2.00448	2.63107	4.53998	5.3001
4930403P22Rik	1	36332708	36333420	+	713	1.54853	1.61722	1.18954	1.1646	1.53594	1.77319	1.10057	3.33972	2.19382	2.05984	1.34914	1.85319	1.51723
4930404A12Rik	5;5;5;5;5	124721997;124721998;124723530;124725016;124725016	124722489;124722489;124723699;124725079;124725079	-;-;-;-;-	727	12.6243	14.6524	15.3457	13.8584	12.1944	18.0529	14.5225	9.82623	4.66175	6.73392	12.0477	11.0702	13.7228
4930404H24Rik	2;2	153492790;153493611	153492889;153493841	+;+	331	1.25087	1.16121	1.97105	1.83967	1.2604	1.2732	1.93967	0.194433	0.262537	0.295804	0.458866	0.362901	0.907845
4930404I05Rik	16;16;16;16;16	91011249;91013721;91015249;91015816;91015816	91011319;91015467;91015467;91016743;91016503	+;+;+;+;+	2746	2.38733	2.35951	2.44716	2.54007	1.95606	3.57366	2.87062	1.57026	1.61394	1.74714	1.85292	2.18718	2.692
4930404N11Rik	10;10;10;10;10;10;10;10;10;10;10;10	81363067;81363923;81364024;81364047;81364542;81364542;81364542;81364542;81364742;81364742;81365704;81365704	81364162;81364236;81364236;81364265;81364667;81364876;81364980;81364667;81364980;81364854;81365790;81365816	-;-;-;-;-;-;-;-;-;-;-;-	1751	8.51248	9.21937	8.53249	14.0685	13.7892	12.7158	7.65925	4.11652	2.63032	2.29261	7.45978	10.0843	13.4889
4930405A21Rik	2;2;2;2;2;2;2	156714540;156715952;156716095;156716885;156716885;156720706;156720706	156715049;156716245;156716245;156717013;156717013;156720826;156720909	-;-;-;-;-;-;-	1137	0.728298	1.11073	0.631188	1.41193	1.0549	1.5885	1.12934	0.226411	0.535003	0.258341	0.62339	0.63388	1.05716
4930405D11Rik	11;11;11;11;11;11;11;11	90804692;90823070;90883320;90883345;90887623;90894696;90894696;90894696	90804771;90823180;90883490;90883490;90887740;90894999;90895093;90895149	+;+;+;+;+;+;+;+	934	0	0	0	0	0	0	0	0	0	0	0	0	0
4930405G09Rik	7	68315973	68317032	-	1060	0	0.103601	0	0	0	0.0567963	0	0.364287	1.31169	0.738953	0.19105	0.283302	0.170093
4930405H06Rik	5;5	99625836;99626708	99626271;99627062	+;+	791	0.0872393	0	0	0.069984	0	0.0761114	0	0	0	0	0.0640053	0	0
4930405L22Rik	5;5;5	45926818;45927589;45932342	45927206;45927716;45932409	-;-;-	585	0	0	0	0	0	0	0	0	0	0	0	0	0
4930405N21Rik	5	113320454	113321653	-	1200	0	0.183029	0	0	0.0434574	0	0.0594474	0	0	0	0	0	0.0500828
4930405O22Rik	17;17;17;17;17;17;17	63305446;63305679;63305735;63308487;63308487;63312867;63312867	63305623;63306138;63306138;63308753;63308753;63312971;63312973	-;-;-;-;-;-;-	1012	5.93236	5.53426	5.6732	4.81368	3.0403	8.03118	7.19009	2.92534	3.0913	4.93426	3.45192	4.27305	5.8199
4930406D18Rik	3;3;3;3;3	100426405;100426439;100428521;100428521;100437536	100426659;100426659;100428865;100428737;100437754	+;+;+;+;+	819	0.168513	0.268174	0	0.0675914	0.127348	0.0735093	0	0	0	0	0	0.146667	0
4930407G08Rik	4;4;4	107953932;107957016;107960142	107953971;107957093;107960721	+;+;+	698	0.0988628	0	0	0	0	0.0862523	0	0	0	0	0	0	0.172204
4930407I10Rik	15;15	82059151;82062114	82059398;82066538	+;+	4673	0	0	0	0	0	0	0	0	0	0	0	0	0
4930408K08Rik	3;3	109078590;109080158	109079768;109080414	-;-	1436	0	0	0	0	0	0	0	0	0	0	0	0	0
4930408O17Rik	12;12	104865330;104871072	104865497;104871524	+;+	621	0	0	0	0	0	0.096947	0	0.20727	0	0	0	0	0
4930412B13Rik	2;2;2;2;2;2	117821928;117824720;117877827;117902749;117903178;117909115	117822702;117824858;117877993;117902857;117903241;117909136	+;+;+;+;+;+	1276	0.0540801	0.0430318	0	0.173534	0.040869	0	0	0.302621	0.953445	0.383665	0.158709	0.564828	0.376798
4930412C18Rik	4;4;4;4;4;4;4;4;4;4;4;4;4;4;4;4	9770585;9770585;9770651;9770679;9770797;9776037;9776037;9776768;9779275;9782626;9782626;9782626;9784905;9819924;9819924;9819924	9770821;9770694;9770821;9771102;9770948;9776197;9776197;9776944;9780707;9782739;9782739;9782739;9785161;9820286;9821951;9823411	+;+;+;+;+;+;+;+;+;+;+;+;+;+;+;+	6148	0.561209	0.861854	0.413863	0.15307	0.15268	0.685473	0.498941	0.0314041	0.0989424	0.127406	0.40351	0.293071	0.117305
4930412E21Rik	3;3;3	23461050;23461508;23521055	23461416;23461574;23521398	+;+;+	778	0	0	0	0	0	0	0	0	0	0	0	0	0
4930412F09Rik	6;6;6	30896899;30908134;30942593	30896976;30908194;30943470	+;+;+	1017	0	0	0	0	0	0	0	0	0	0	0	0	0
4930412F12Rik	8	57650889	57652359	-	1471	0.797489	1.08249	1.24186	1.24187	1.59531	1.43246	1.21239	0.700012	1.24058	1.1981	1.03253	1.55152	1.42996
4930412L05Rik	4;4;4;4;4;4;4;4;4;4;4;4;4	53205066;53206967;53207271;53209304;53214473;53214557;53214644;53214644;53215245;53215500;53215500;53217351;53217351	53205299;53207181;53207467;53209525;53214566;53214566;53214674;53214703;53215293;53215536;53215536;53217561;53217857	-;-;-;-;-;-;-;-;-;-;-;-;-	1615	0.213642	0.237994	0	0.034277	0.0322903	0.149112	0.0883429	0	0.430463	0.121252	0.156744	0.223133	0.0372132
4930412M03Rik	11;11	60112219;60114695	60112793;60115230	-;-	1111	7.3292	7.31455	4.93278	3.78682	5.49182	6.28594	6.09992	2.83844	3.67623	3.9658	3.50888	4.86535	5.78815
4930412O13Rik	2;2;2;2;2;2;2	9881252;9881766;9882543;9882636;9883007;9883007;9883796	9881679;9881941;9882864;9882864;9883335;9883141;9883921	+;+;+;+;+;+;+	1381	0.0499683	0	0	0	0.113285	0.0871891	0.206624	0	0	0	0.109982	0.0869806	0.130556
4930413E15Rik	5;5;5;5;5	118952339;118953164;118956385;118959963;118961076	118953023;118953263;118956561;118960104;118961261	+;+;+;+;+	1290	0	0	0.0505751	0	0	0	0	0	0	0	0	0	0
4930413G21Rik	7	122969058	122970050	-	993	1.80681	2.76478	2.29956	1.56093	0.682714	2.24325	3.37647	3.43499	3.06293	2.46504	3.77289	3.17538	1.99726
4930415F15Rik	11;11;11;11;11;11;11;11;11;11;11;11;11;11;11;11;11;11	11462094;11464256;11477094;11487671;11487671;11488508;11488508;11489266;11490221;11490221;11495415;11495415;11496401;11496401;11509230;11509230;11514977;11514977	11462316;11464826;11477194;11487747;11487747;11488537;11488646;11489478;11490288;11490288;11495456;11495456;11496508;11496508;11509337;11509337;11515190;11515192	+;+;+;+;+;+;+;+;+;+;+;+;+;+;+;+;+;+	1866	0.295847	0.264832	0.139854	0.207664	0.139734	0.161319	0.248494	0.448363	0.372561	0.419769	0.596902	0.225306	0.193246
4930415H17Rik	11	99683618	99683740	-	123	0	0	0	0	0	0	0	0	0	0	0	0	0
4930415L06Rik	X;X	89930098;89932811	89932672;89932852	-;-	2617	0	0	0	0	0	0	0	0	0	0	0	0	0
4930415O20Rik	15;15;15;15	98571004;98585270;98588553;98589412	98571124;98585392;98588697;98589588	+;+;+;+	566	0.609596	1.06713	0.806878	0.684632	0.276407	0.957309	1.0083	1.02335	1.3818	0.172988	0.805042	0.742793	0.743278
4930417H01Rik	2;2;2;2;2;2;2;2;2;2;2;2;2;2;2;2;2;2;2;2;2;2;2;2;2;2;2	122702047;122702905;122702907;122704229;122704234;122704236;122707122;122707122;122707122;122707122;122707122;122708043;122708063;122708063;122708063;122717895;122717895;122717895;122718158;122718158;122718161;122719272;122719272;122719272;122720516;122720516;122720516	122702176;122702984;122702984;122704326;122704326;122704326;122707204;122707204;122707204;122707204;122707204;122708168;122708168;122708168;122708168;122718118;122718118;122718230;122718230;122718230;122718229;122719364;122719364;122719364;122721456;122720597;122720596	+;+;+;+;+;+;+;+;+;+;+;+;+;+;+;+;+;+;+;+;+;+;+;+;+;+;+	1887	1.06051	0.87295	0.968083	0.880085	0.663261	0.989045	1.7012	1.87581	1.19735	1.34907	1.28784	1.05034	1.14657
4930417O13Rik	6;6;6;6;6;6;6;6;6;6;6;6;6;6	125265476;125265525;125265545;125265619;125266400;125266400;125266400;125266400;125268852;125270323;125270323;125270642;125273448;125285620	125265577;125266069;125265577;125266069;125266526;125266528;125266526;125266526;125270413;125270413;125270413;125270804;125273777;125287286	+;+;+;+;+;+;+;+;+;+;+;+;+;+	4445	0.0155245	0.0247058	0.0146776	0.0373615	0.0469281	0.0406327	0.0320976	0.0144786	0.05865	0	0.0797294	0	0.040562
4930417O22Rik	11;11;11;11	101952421;101955695;101956051;101959670	101952479;101955864;101956101;101960573	+;+;+;+	1184	0.116565	0	0	0	0	0	0	0	0	0	0	0	0
4930419G24Rik	3;3;3;3;3;3;3;3	33024777;33034726;33055720;33080000;33083677;33086269;33088128;33088329	33024902;33034788;33055803;33080050;33083848;33086446;33088232;33088607	+;+;+;+;+;+;+;+	1058	0	0.155695	0.123331	0	0	0	0.134852	0.121659	0.0821359	0	0	0	0.0568047
4930420N18Rik	1	42651726	42652401	+	676	0	0	0	0	0	0	0	0	0	0	0	0	0
4930421C12Rik	5	39442001	39443574	-	1574	0	0	0	0	0	0	0	0.122663	0.110419	0.186616	0.0321653	0	0
4930421P07Rik	5	38575031	38575429	+	399	0	0	0	0	0	0	0	0	0	0	0	0	0
4930422M22Rik	9;9	99299007;99304476	99299754;99304675	-;-	948	7.49752	6.08164	3.44103	1.63503	1.65028	3.81039	3.7625	0.746763	1.1	0.929537	2.0828	2.28076	1.71169
4930423C22Rik	12	82959847	82961157	-	1311	0.315818	0.125649	0.049765	0.0844506	0.238668	0.229611	0.326485	0.0490903	0.13257	0.0746844	0.231708	0.0916249	0
4930423M02Rik	4;4;4;4;4;4;4;4;4	5632328;5632336;5633036;5633036;5638638;5638670;5641290;5641290;5642053	5632373;5632373;5633205;5633205;5638725;5638725;5641757;5641958;5642284	+;+;+;+;+;+;+;+;+	1205	0	0	0	0	0	0	0	0	0	0	0	0	0
4930425K10Rik	5;5;5;5	67933610;67935512;67938515;67942918	67933826;67935700;67938687;67943083	-;-;-;-	745	0.0926259	0.0737028	0.087573	0	0.0699985	0	0	0.0863858	0	0	0	0.0806176	0.0806703
4930425L21Rik	6;6;6;6;6;6;6;6	135658913;135664843;135679506;135679637;135680084;135680084;135683241;135683975	135659061;135664936;135679732;135679732;135680333;135680333;135683391;135684527	+;+;+;+;+;+;+;+	1424	0	0	0	0	0	0	0	0	0	0	0	0	0
4930425O10Rik	3;3;3;3	138711535;138714932;138715484;138726862	138712672;138715039;138715532;138726984	-;-;-;-	1418	0	0	0	0	0	0	0	0	0	0	0	0	0
4930426D05Rik	18;18;18;18;18;18;18;18;18;18;18;18;18;18;18	21651448;21651565;21652294;21652560;21652563;21652707;21653461;21653809;21653809;21653809;21653809;21655022;21655022;21655022;21655022	21651939;21651738;21652862;21653513;21652870;21652862;21653513;21654013;21654013;21654013;21654013;21656105;21655157;21655141;21655148	+;+;+;+;+;+;+;+;+;+;+;+;+;+;+	3001	0	0	0	0	0	0	0	0	0	0	0.0168704	0	0
4930426I24Rik	12;12	76402757;76403157	76402895;76403654	-;-	637	1.19163	0.861987	0.10242	0.521419	0.409332	0.283536	0.447956	0.101032	0.13642	0.307414	0.238437	0.377143	0.75478
4930426L09Rik	2	18998343	18999801	+	1459	0.141891	0.112903	0.268301	0.227652	0.178714	0.288848	0.146683	0.220553	0.476489	0.0671085	0.416407	0.493983	0.329537
4930427A07Rik	12;12;12;12;12;12;12;12;12;12;12;12;12;12;12;12;12;12;12;12;12;12;12;12;12;12;12;12;12;12;12;12;12	113156421;113156430;113156440;113156456;113156506;113156675;113156675;113156675;113156675;113156675;113157161;113157161;113157161;113157471;113157571;113157578;113157578;113158069;113158069;113158069;113158069;113161303;113161303;113161303;113161303;113161713;113161713;113161713;113161713;113163053;113163053;113163053;113164774	113156571;113156571;113156571;113156571;113156571;113156753;113156753;113156926;113156753;113156753;113157589;113157363;113157363;113157727;113157727;113157727;113157727;113158167;113158167;113158167;113158167;113161389;113161389;113161389;113161389;113161815;113161892;113161892;113161892;113164547;113164740;113164544;113166048	+;+;+;+;+;+;+;+;+;+;+;+;+;+;+;+;+;+;+;+;+;+;+;+;+;+;+;+;+;+;+;+;+	4299	0.353137	0.421489	0.470458	1.01727	1.2737	0.518156	0.564191	0.299406	0.202139	0.29608	0.506399	0.349268	0.433375
4930428N03Rik	14;14;14;14	24622138;24622159;24622676;24628609	24622322;24622322;24622860;24629200	+;+;+;+	962	0	0	0	0	0	0	0	0	0	0	0	0	0
4930428O21Rik	5;5;5	107698212;107702249;107703410	107699555;107702573;107703480	-;-;-	1740	0	0.0631133	0	0.0636291	0.0599412	0	0	0.591792	1.54821	0.225083	0.0872899	0.276138	0.0690797
4930429D17Rik	5;5;5;5;5;5;5	103230375;103240720;103254384;103282484;103287026;103288172;103298958	103231433;103240799;103254426;103282584;103287165;103288300;103299029	-;-;-;-;-;-;-	1624	0	0.101432	0.0803471	0	0.0160557	0.111214	0	0.158516	0.107019	0.271306	0	0	0
4930429F24Rik	9;9;9	79793641;79795740;79802087	79793865;79795885;79803235	+;+;+	1520	1.22577	1.40884	0.94429	0.691967	0.720478	1.5051	1.4549	1.86298	1.7723	2.38337	0.99924	0.316106	0.355851
4930429H19Rik	7;7;7;7;7	73310380;73310530;73311653;73313492;73314954	73311855;73310711;73311954;73313593;73315193	+;+;+;+;+	1917	0.071994	0.028643	0.0340333	0	0	0.0628107	0	0	0	0	0	0	0
4930429P21Rik	9;9;9;9	107351276;107351786;107352013;107353735	107351491;107353594;107352050;107353986	-;-;-;-	2277	0	0	0	0	0	0	0	0.339169	0.190821	0.344001	0.111173	0	0
4930430A15Rik	2;2;2;2;2;2;2;2;2;2;2;2;2;2;2;2;2;2;2;2;2;2;2;2;2;2;2;2;2;2;2;2	111162061;111164308;111164468;111169594;111170285;111171824;111171990;111190344;111193254;111193452;111194159;111194159;111194323;111194323;111198064;111198064;111200351;111200351;111203950;111203950;111204115;111204115;111205065;111211547;111214584;111215584;111218595;111220677;111225405;111227919;111228252;111229174	111162089;111164380;111164496;111169675;111170352;111171896;111172018;111190425;111193519;111193519;111194231;111194231;111194351;111194351;111198133;111198133;111200418;111200418;111204022;111204022;111204143;111204143;111205199;111211643;111214656;111215617;111218659;111220814;111225511;111228092;111228366;111229602	-;-;-;-;-;-;-;-;-;-;-;-;-;-;-;-;-;-;-;-;-;-;-;-;-;-;-;-;-;-;-;-	2440	0.0282813	0.135021	0	0	0	0.0246738	0	0	0	0.120383	0	0.0246148	0
4930430E12Rik	4;4;4;4;4;4;4;4	6352105;6353615;6355142;6355211;6357167;6357167;6357425;6357425	6352529;6353848;6355411;6355411;6357266;6357266;6357530;6357530	-;-;-;-;-;-;-;-	1135	0.0607985	0.338643	0.344891	8.14509	6.61624	1.24652	0.502815	5.01818	3.71334	3.88194	4.19299	7.93746	14.3497
4930430F08Rik	10;10;10;10;10;10;10	100572274;100575717;100577161;100578315;100583914;100586191;100589027	100573760;100575886;100577358;100578431;100584009;100586308;100589259	-;-;-;-;-;-;-	2419	2.51036	2.76926	3.42526	1.85364	1.40127	2.96167	4.09915	0.611914	0.610705	0.89047	1.4232	1.63868	1.6646
4930430O22Rik	5;5	115436066;115436068	115436644;115436606	-;-	579	0	0	0	0	0.0900671	0	0	0.222305	0	0	0	0	0
4930431F12Rik	5;5;5;5;5;5;5;5;5;5;5;5;5	44966200;44966535;44966583;44966799;44966799;44967790;44967790;44971569;44972080;44972641;44973495;44977057;44977818	44966310;44966588;44966588;44967143;44967143;44967867;44967959;44971604;44972279;44972769;44973618;44977162;44978805	+;+;+;+;+;+;+;+;+;+;+;+;+	2263	0.0304933	0	0	0	0.0691324	0.0266037	0	0.0568779	0.0384002	0.0865322	0	0.0796201	0.0531148
4930431L21Rik	3;3;3;3;3	33866813;33870973;33870974;33871846;33897338	33867087;33871074;33871074;33871939;33897584	-;-;-;-;-	718	0	0	0	0	0	0	0	0	0	0	0	0	0
4930431P03Rik	14;14;14;14;14;14;14;14;14;14	44955217;44956420;44956959;44956959;44957685;44959338;44960263;44960263;44961278;44961278	44956710;44956710;44957030;44959426;44957795;44959426;44960431;44960507;44961307;44961307	-;-;-;-;-;-;-;-;-;-	4237	0.684037	0.466535	0.569731	0.261304	0.221543	0.419169	0.286223	1.25312	2.23556	1.13232	0.56758	0.807983	0.510639
4930431P19Rik	7;7	109752320;109754582	109755278;109755032	+;+	2959	0.839549	1.13194	1.23472	0.430287	0.581586	1.20042	0.31341	0.543743	0.499255	0.661786	0.735725	0.761154	0.670253
4930432B10Rik	10;10;10;10;10;10;10;10	11244790;11255549;11270037;11272033;11273382;11280296;11280642;11280936	11246044;11256840;11270288;11272092;11273526;11280345;11280999;11281221	-;-;-;-;-;-;-;-	3634	0.265847	0.256864	0.143625	0.297047	0.229604	0.397605	0.392608	0.212518	0.119565	0.269431	0.264704	0.247909	0.181919
4930432E11Rik	7;7;7;7;7;7;7	29558579;29560495;29560515;29573922;29573922;29574484;29574484	29558627;29563364;29563364;29574187;29574187;29575478;29582169	+;+;+;+;+;+;+	10871	0.0401812	0.0202037	0.0480117	0.0517877	0.0687419	0.105223	0.0328107	0	0.00799372	0.0180133	0.0520207	0.000939216	0.0345526
4930432H08Rik	5;5	106364561;106366826	106365820;106366849	-;-	1284	0	0	0	0	0	0	0	0	0	0	0	0	0
4930432K21Rik	8;8;8;8;8;8;8;8;8;8;8;8;8;8;8;8;8;8;8;8;8;8	84148025;84148159;84148252;84148838;84148838;84148838;84159445;84159445;84159445;84161213;84161213;84161213;84162300;84162300;84166581;84166581;84170355;84170355;84171818;84171818;84172161;84172161	84148064;84148398;84148398;84148885;84148885;84148885;84159607;84159607;84159607;84161291;84161291;84161291;84162404;84162347;84167690;84167690;84170452;84170452;84171910;84171910;84172589;84172590	+;+;+;+;+;+;+;+;+;+;+;+;+;+;+;+;+;+;+;+;+;+	2406	0.372852	0.228215	0.352512	0.299105	0.173396	0.325292	0.207547	0.160492	0.144472	0.0406946	0.147297	0.224664	0.124895
4930432L08Rik	5;5;5;5;5;5	76331238;76332352;76333192;76337476;76340278;76340792	76331329;76332550;76333270;76337562;76340334;76341885	+;+;+;+;+;+	1608	0	0	0	0	0	0	0	0	0	0	0	0	0
4930432M17Rik	3;3;3;3;3;3;3;3;3;3;3	121670762;121671315;121671317;121674002;121674002;121679442;121679442;121681315;121681315;121682813;121682813	121671215;121671421;121671421;121674140;121674140;121679629;121679629;121681384;121681384;121682835;121682982	+;+;+;+;+;+;+;+;+;+;+	1128	0	0	0	0	0	0.0533724	0	0	0.0770388	0	0.0448831	0	0
4930433B08Rik	3;3;3;3	18468287;18470829;18472648;18480120	18468352;18470990;18472705;18480477	-;-;-;-	644	0	0	0	0.0859586	0	0.0934846	0	0	0	0.152036	0.15723	0.093261	0.279966
4930433I11Rik	7;7;7;7;7	40987543;40987555;40989649;40992916;40992916	40987712;40987712;40989921;40995181;40995435	+;+;+;+;+	2963	0	0	0	0	0	0	0	0	0	0	0	0	0
4930433J02Rik	1;1	185086102;185090046	185086213;185091319	+;+	1386	0	0	0	0.0399404	0	0	0	0	0	0	0.0365283	0	0
4930433N12Rik	9;9;9;9;9;9;9;9;9;9	3133847;3134876;3190271;3190583;3192312;3192312;3192820;3192820;3199537;3199537	3134024;3135102;3190805;3190805;3192412;3192412;3193048;3193048;3199799;3199782	-;-;-;-;-;-;-;-;-;-	1533	0	0.0716354	0	0	0.0340175	0.0392721	0	0	0	0	0.0660511	0	0.0392038
4930434B07Rik	1;1	90153628;90159073	90154257;90159462	+;+	1020	0	0	0	0	0	0	0	0	0	0	0	0	0
4930434O05Rik	6	142989610	142989996	+	387	0	0	0	0	0	0	0	0	0	0	0	0	0
4930435C17Rik	7;7;7;7;7;7;7;7	39789235;39789400;39871240;39871240;39910134;39910134;39910585;39910585	39789590;39789590;39871353;39871361;39910251;39910251;39910970;39910970	-;-;-;-;-;-;-;-	982	0	0	0	0	0	0	0	0	0	0	0	0	0
4930435E12Rik	16;16;16;16;16;16;16	38812205;38824331;38824493;38826979;38826979;38827855;38827855	38812467;38824552;38824555;38827125;38827125;38828731;38828749	-;-;-;-;-;-;-	1530	0	0	0	0	0	0	0	0	0	0	0	0	0
4930435N07Rik	8	9459092	9461218	+	2127	0	0.025815	0	0	0	0.0283047	0	0	0	0	0.0238026	0	0
4930438A08Rik	11;11;11;11;11;11;11;11;11;11;11;11;11;11	58274799;58275060;58286495;58286495;58287374;58287374;58288213;58288213;58289698;58289698;58291443;58291443;58293237;58293237	58275087;58275087;58286724;58286724;58287486;58287486;58288414;58288414;58289766;58289766;58291548;58291579;58293406;58294289	+;+;+;+;+;+;+;+;+;+;+;+;+;+	2093	0	0	0	0.238039	0.149495	0.0862935	0	3.53612	4.94079	3.18106	1.45136	0.516523	0.25843
4930438E09Rik	14;14;14;14;14;14	67332042;67352224;67356649;67376981;67397133;67397719	67332449;67352341;67356750;67377039;67397197;67397742	-;-;-;-;-;-	776	0	0.0707585	0	0.0713368	0	0.0775826	0	0	0	0	0.0652425	0	0
4930439A04Rik	1;1;1;1;1	37329667;37333539;37333645;37334064;37334064	37330122;37333834;37333834;37334156;37334172	-;-;-;-;-	861	2.64484	2.48715	2.04591	2.37889	1.8776	2.72701	2.3199	0.896967	2.82601	2.61551	2.29326	2.79025	4.39751
4930439D14Rik	1	156939838	156940196	+	359	0.192218	0.152949	0	0	0	0.503098	0	0.358537	0	0	0.282051	0.501895	0
4930440C22Rik	1;1;1;1;1;1;1;1;1	94797083;94797442;94797534;94799366;94799366;94800998;94801080;94802314;94802314	94797124;94797709;94797709;94800384;94799483;94801116;94801116;94802472;94802452	+;+;+;+;+;+;+;+;+	1607	0	0	0	0	0	0	0	0	0	0	0	0	0
4930440I19Rik	2;2;2;2;2;2;2;2;2;2;2	78051177;78051223;78061151;78061151;78063017;78069157;78184521;78184718;78185666;78187937;78194185	78051338;78051338;78061300;78061300;78063130;78069406;78184592;78184875;78185733;78188118;78194430	+;+;+;+;+;+;+;+;+;+;+	1402	0.0492199	0	0	0.789691	0.892705	0.0858832	0.0508823	0.137712	0	0.0698368	0.0722228	0.171355	0.171468
4930441H08Rik	7;7;7	71909693;71935165;71939101	71909953;71935313;71939191	+;+;+	501	0	0	0	0	0	0	0	0	0	0	0	0	0
4930441J16Rik	2;2;2;2;2	74298940;74300407;74304190;74307177;74307669	74299076;74300519;74304328;74307254;74307717	-;-;-;-;-	516	0	0	0	0	0	0	0	0	0	0	0.196233	0	0
4930442H23Rik	10	81182605	81183849	-	1245	3.04847	2.77851	3.72062	3.068	2.72263	2.75633	4.5839	3.25664	3.35035	2.04473	3.86319	3.5216	3.23426
4930442J19Rik	2;2;2;2;2;2;2;2;2;2	151301974;151302028;151308482;151314095;151314095;151314349;151314381;151314701;151314701;151315256	151302094;151302094;151308635;151314272;151314268;151314607;151314607;151314720;151314771;151316247	+;+;+;+;+;+;+;+;+;+	1775	0	0	0	0	0	0	0	0	0	0	0	0	0
4930442L01Rik	3;3	96829826;96832023	96831828;96832096	-;-	2077	0.033224	0.0264365	0	0.0533051	0	0.0289861	0.0343461	0.0309857	0.0836781	0.0471407	0.121878	0.173501	0
4930442P19Rik	5	35390673	35391912	-	1240	0	0	0	0	0	0	0	0	0	0	0	0	0
4930443G03Rik	6	139575924	139577205	-	1282	0	0	0	0	0	0	0	0	0	0	0	0	0
4930443O20Rik	2;2;2	85073614;85076767;85086351	85074746;85076965;85086461	-;-;-	1443	2.29543	2.01674	0.994678	1.15088	1.30101	1.71058	1.92802	4.37077	4.87795	4.41042	1.82444	1.74811	1.29112
4930444A19Rik	1;1;1;1;1;1;1;1	54681729;54690496;54716964;54717511;54729486;54729486;54736698;54765589	54681922;54690592;54717059;54717650;54729569;54729569;54736816;54767524	+;+;+;+;+;+;+;+	2666	12.9678	12.7591	10.7431	7.1325	6.24965	12.6686	11.4926	5.86603	4.04185	4.00312	8.28927	11.0275	6.28947
4930444E06Rik	2;2	144243241;144243657	144243287;144244849	+;+	1240	0.333901	0.435283	0.263072	0.803574	0.525694	0.87393	0.805417	1.16778	1.47169	0.592205	1.10239	0.476122	0.0484672
4930444G20Rik	10	22066307	22068079	-	1773	0.0128438	0	0.00735949	0.0312224	0.00970622	0	0.0470751	0	0	0.0182237	0.0142775	0	0.124402
4930444M15Rik	14;14;14;14	76514558;76515878;76519854;76520562	76515134;76516352;76520165;76520855	-;-;-;-	1658	0	0	0	0.033388	0	0	0	0.0388163	0	0.0590538	0	0	0
4930444P10Rik	1;1;1;1;1;1;1;1;1;1;1;1;1;1;1	16065979;16065979;16065979;16068800;16068800;16068800;16078568;16078568;16078568;16080830;16080830;16080830;16081668;16092974;16092974	16066274;16066274;16066274;16068855;16068855;16068855;16078700;16078700;16078700;16080993;16080993;16081212;16082510;16093325;16093325	-;-;-;-;-;-;-;-;-;-;-;-;-;-;-	2063	0.234146	0.692013	0.0948742	0.617169	0.176947	0.817118	0.207475	0.062392	0.336984	0.616988	0.588985	0.29113	0
4930445B16Rik	2;2;2;2;2	96987018;97002937;97005206;97011565;97083396	96987138;97003440;97005301;97011800;97083561	-;-;-;-;-	1123	0	0	0	0	0	0	0	0	0	0	0	0	0
4930445N08Rik	2;2	74579076;74584281	74579124;74584544	+;+	313	0	0.175427	0	0	0	0	0	0	0	0	0	0	0
4930445N18Rik	18;18;18;18;18	82855894;82855897;82856303;82858841;82869809	82856130;82856130;82856632;82859162;82870604	+;+;+;+;+	1685	0	0	0	0.032853	0	0.0357294	0.0423365	0.0381943	0.0515725	0	0	0.035644	0.0356673
4930447A16Rik	15;15;15;15	37425554;37429790;37439523;37440478	37425813;37429856;37439615;37440644	+;+;+;+	587	7.17101	5.706	5.77952	1.79181	1.77679	5.74349	5.83334	0.438551	0.888243	1.66799	1.55248	1.94402	1.02384
4930447C04Rik	12;12;12;12;12;12;12;12;12;12;12;12;12;12;12;12;12;12;12;12;12;12;12;12;12;12;12;12;12;12;12;12;12;12;12;12;12;12;12;12;12;12;12;12;12;12;12;12;12;12;12;12;12;12;12;12;12;12;12;12;12;12;12;12;12;12;12;12;12;12;12;12;12;12;12;12;12;12;12;12	72881109;72881109;72885223;72885223;72889708;72889708;72892804;72892804;72892816;72892870;72892924;72894984;72894984;72894984;72898487;72898487;72898487;72898487;72898487;72898710;72898710;72898710;72898710;72898710;72902413;72902413;72902413;72902413;72903216;72903216;72903216;72903216;72903216;72906185;72906191;72906191;72906191;72906191;72906234;72907821;72907821;72908512;72909771;72909771;729…	72881424;72881424;72885280;72885280;72889846;72889846;72892979;72892979;72892979;72892979;72892979;72895045;72895045;72895045;72898533;72898533;72898533;72898533;72898533;72898795;72898795;72898795;72898795;72898795;72902489;72902489;72902489;72902489;72903334;72903334;72903334;72903334;72903334;72906473;72906271;72906277;72906279;72906282;72906279;72907941;72907941;72909813;72909813;72909813;729…	-;-;-;-;-;-;-;-;-;-;-;-;-;-;-;-;-;-;-;-;-;-;-;-;-;-;-;-;-;-;-;-;-;-;-;-;-;-;-;-;-;-;-;-;-;-;-;-;-;-;-;-;-;-;-;-;-;-;-;-;-;-;-;-;-;-;-;-;-;-;-;-;-;-;-;-;-;-;-;-	5981	0	0	0	0	0.00871909	0	0	0	0	0.0327408	0.0169297	0	0.0200968
4930447C11Rik	6	146846276	146847203	-	928	0	0	0	0.0596523	0	0	0	0	0	0	0.0545562	0	0
4930447F04Rik	X;X	66303361;66303978	66303816;66304224	-;-	703	0	0	0	0.157489	0	0	0	0	0.123613	0.139276	0	0	0
4930447F24Rik	9;9;9;9;9;9;9;9	108133718;108136855;108137328;108137417;108137417;108137664;108137664;108137664	108133790;108137141;108137566;108137566;108137566;108137715;108137904;108138567	+;+;+;+;+;+;+;+	1503	0	0	0	0	0.10409	0.040056	0.047463	0.0428193	0.115635	0.0651439	0.0336847	0.0799203	0.239918
4930447M23Rik	2;2;2;2;2;2;2;2;2;2;2	19344317;19344838;19344937;19347565;19347565;19347565;19348514;19348514;19348514;19348744;19350938	19345119;19345167;19345167;19347687;19347687;19347687;19348936;19348611;19348611;19349202;19351050	+;+;+;+;+;+;+;+;+;+;+	1776	0.0388549	0.061834	0.0367353	0.093509	0.0587262	0.0338987	0.0401672	0	0	0	0	0	0.135359
4930447N08Rik	3;3;3;3;3;3;3;3;3;3;3	122761955;122769526;122769561;122795084;122795091;122798343;122799743;122801837;122801837;122801837;122801837	122762216;122769682;122769682;122795288;122795288;122799052;122799846;122801981;122801894;122801949;122802048	-;-;-;-;-;-;-;-;-;-;-	1650	9.61906	11.0566	9.29202	5.13314	7.11121	11.3111	12.538	1.83321	1.05333	0.771422	1.65692	2.8028	4.48013
4930448A20Rik	7;7	126740629;126741991	126741471;126742181	+;+	1034	0.133474	0.0531031	0	0	0.0504341	0.116449	0	0.560171	0.0840423	0.0946917	0	0.290426	0
4930448D08Rik	18;18	69969677;69971151	69969707;69972366	+;+	1247	0.49804	0.17613	0.104638	0.443924	0.460014	0.337954	0.286034	0.258049	0	0	0.1624	0.0963273	0.192781
4930448E22Rik	9;9;9;9;9;9;9;9	46326393;46326434;46327121;46327652;46327702;46328743;46328743;46328743	46327302;46327302;46328902;46328099;46327895;46329527;46328847;46329413	-;-;-;-;-;-;-;-	3135	0.132069	0.0350294	0.0416216	0.0176578	0.0332688	0.172835	0.113775	0	0.0277192	0	0.0161493	0	0
4930448H16Rik	5;5;5;5	143227718;143228547;143228995;143234510	143227823;143228693;143229082;143234748	+;+;+;+	580	0	0	0	0	0	0	0	0.110961	0	0	0	0	0
4930448I06Rik	1;1;1	41167587;41176376;41180999	41167838;41176415;41181252	-;-;-	546	0	0	0	0	0	0	0	0	0	0	0	0	0
4930448I18Rik	5;5;5	50151333;50154192;50155821	50151670;50154314;50156095	+;+;+	736	0.0937585	0.074604	0	0	0	0	0.290776	0.0874421	0	0	0	0.163207	0
4930448K20Rik	4;4	9915965;9916638	9917397;9917635	-;-	1671	0	0	0	0	0	0	0	0	0	0	0	0	0
4930449A18Rik	3;3;3;3;3;3;3	59777809;59825749;59838367;59838367;59839769;59841636;59846221	59778326;59825886;59839919;59838589;59839838;59841807;59846817	+;+;+;+;+;+;+	2978	0	0	0	0	0	0	0	0	0	0	0	0	0
4930449E01Rik	14;14;14;14;14;14;14;14	105498788;105500936;105503576;105504436;105505226;105505226;105505527;105505527	105499081;105501295;105503609;105504625;105505430;105505430;105505622;105505629	+;+;+;+;+;+;+;+	1186	0	0	0	0	0	0	0	0	0	0	0	0	0
4930449I04Rik	5	45857642	45858764	+	1123	0.0614481	0.0488945	0.058096	0	0.0464371	0.10722	0.0635235	0.114617	0.232145	0	0.0901659	0	0.0535168
4930449I24Rik	5;5;5;5;5	146502399;146502743;146503485;146504177;146504622	146502559;146502945;146503532;146504370;146505183	+;+;+;+;+	1168	0	0	0	0	0	0	0	0	0	0	0	0	0
4930451E10Rik	13;13;13;13;13;13;13;13;13	55775136;55775940;55775947;55783882;55783882;55783882;55784425;55784425;55784425	55775393;55776103;55776310;55784071;55783993;55783993;55784479;55784505;55784494	-;-;-;-;-;-;-;-;-	900	2.6069	4.20966	3.55206	2.76787	2.72333	3.41157	2.69495	0.858099	0.482776	0.326371	0.95631	1.001	1.33554
4930451G09Rik	16;16;16;16;16;16	4968936;4971852;4974038;4976143;4976530;4977498	4969185;4971969;4974179;4976289;4976613;4978962	+;+;+;+;+;+	2206	0.437936	0.771607	0.621069	0.50188	0.472791	0.573112	0.549741	0.175043	0.15757	0.621377	0.436054	0.462838	0.490385
4930451I11Rik	7;7;7;7;7;7;7;7;7;7;7	126830468;126830469;126830477;126830710;126830710;126830872;126830872;126830872;126831411;126831411;126831613	126830618;126830618;126830618;126830797;126830797;126831027;126831027;126831027;126831472;126831496;126831639	-;-;-;-;-;-;-;-;-;-;-	508	0	0	0	0	0	0	0	0	0.171062	0	0.0996617	0	0.118306
4930452B06Rik	14;14;14;14;14;14;14;14;14;14;14;14;14;14;14;14	8431192;8442856;8473351;8482417;8510862;8515253;8516451;8517839;8518630;8536518;8558034;8578348;8644397;8659389;8662259;8665978	8431718;8442950;8473412;8482620;8511193;8515375;8516567;8517992;8518766;8536655;8558190;8578462;8644469;8659482;8662348;8666240	-;-;-;-;-;-;-;-;-;-;-;-;-;-;-;-	2681	1.13252	0.921628	1.5331	0.289072	0.466831	0.853322	1.2772	0.19204	0.453785	0.766929	0.50987	0.134413	0.269001
4930452N14Rik	1;1;1;1	154241521;154254276;154256040;154256603	154241700;154254331;154256112;154256906	-;-;-;-	613	0	0	0	0	0	0	0	0	0	0	0	0	0
4930453H23Rik	X;X;X;X;X;X;X;X;X	21206580;21207057;21218401;21218410;21219296;21219296;21219492;21221227;21221227	21207319;21207314;21218539;21218539;21219394;21219394;21219793;21221564;21221665	-;-;-;-;-;-;-;-;-	1719	0	0	0	0	0	0	0	0	0	0	0	0	0
4930453L07Rik	8;8;8	9144669;9146866;9148888	9144692;9148117;9149050	+;+;+	1439	0	0	0	0	0	0	0	0	0	0	0	0	0
4930453N24Rik	16;16;16;16;16	64751751;64762136;64766077;64768924;64770737	64752176;64766993;64766656;64769162;64771161	-;-;-;-;-	5948	5.40634	7.19433	6.47154	5.56552	4.75635	6.97216	6.89023	8.07172	7.10772	8.90551	7.19672	6.39678	7.02742
4930453O03Rik	1;1;1;1;1	88347489;88350446;88351337;88351666;88352837	88348285;88350557;88351513;88351721;88352930	-;-;-;-;-	1236	0	0.0444244	0	0	0	0	0	0	0	0	0	0	0
4930455B14Rik	14;14;14;14;14;14;14;14;14	8666390;8666390;8666935;8666935;8669292;8669292;8671641;8672831;8672831	8666525;8666525;8667011;8667011;8669412;8669412;8671745;8673378;8673320	+;+;+;+;+;+;+;+;+	987	0	0	0	0	0	0	0	0	0	0	0	0	0
4930455D15Rik	18;18;18;18;18	32663642;32742383;32742787;32832759;32836980	32663804;32742510;32742853;32833708;32837287	-;-;-;-;-	1616	0.170808	0.135912	0.0807449	0.23979	0.322703	0.186275	0.132432	0.199126	0.107549	0.242355	0.187976	0.148664	0.111571
4930455G09Rik	4;4	142017898;142028600	142018130;142028996	+;+	630	0.657203	0.348626	1.13914	1.14229	0.910536	1.62455	0.452933	0.306464	0.413808	1.39873	1.28579	0.953335	1.81252
4930455H04Rik	3;3;3	116968267;116970203;116983473	116968599;116970276;116984406	+;+;+	1341	3.4992	5.93717	4.86516	2.60068	2.25551	3.90586	5.90485	0.623897	0.972033	0.876163	1.8877	1.7915	1.52377
4930456G14Rik	1	40049039	40050368	-	1330	0	0	0	0	0.0784194	0	0.0536368	0.048389	0	0.0736175	0.190331	0.045158	0.18075
4930456L15Rik	4;4;4;4	103290959;103297625;103309512;103311585	103291712;103297703;103309615;103311832	+;+;+;+	1185	0	0	0	0	0	0	0	0	0	0	0	0	0
4930458B22Rik	7;7	106809931;106813836	106810417;106814102	-;-	754	0	0	0	0	0.207489	0	0	0.0853546	0.115252	0.129856	0.134292	0	0.0797074
4930458D05Rik	5;5	100840797;100845122	100841805;100847167	-;-	3055	0.677639	0.75488	0.811519	0.688569	0.30726	0.729149	0.723877	1.28504	1.82049	1.34608	0.629745	1.19924	0.914769
4930459L07Rik	5;5;5	58443239;58448669;58452951	58443575;58448702;58452999	-;-;-	420	0	0	0	0	0	0	0	0	0	0	0	0	0
4930461C15Rik	16;16	58404878;58408172	58406074;58408276	-;-	1302	0	0	0.0501089	0	0	0	0	0	0.0667433	0.0752006	0.0388849	0.0461291	0
4930461G14Rik	9;9;9	58455122;58466801;58469145	58455356;58466917;58469635	+;+;+	843	0	0	0	0	0	0.142833	0.0846227	0	0	0	0	0	0
4930463O16Rik	10;10;10;10;10;10	84488293;84488734;84492680;84492680;84493798;84496771	84489181;84489181;84492726;84493080;84493930;84497435	+;+;+;+;+;+	2088	0	0	0	0	0.0249755	0.0288334	0.0341652	0.339048	0.582661	0.562708	0.121236	0	0.0287832
4930465I24Rik	8;8	11678808;11681904	11678925;11682211	+;+	426	0	0	0	0	0.122415	0	0	0	0	0	0	0	0
4930465K10Rik	18;18;18	77714210;77714276;77714328	77714274;77714326;77715449	+;+;+	1238	0.22296	0.133058	0.105399	0.268291	0.0421235	0.0972603	0	0.155955	0.0701936	0.158176	0.245371	0.194055	0.291273
4930465M20Rik	12;12;12;12;12	107723740;107729361;107729496;107735435;107735449	107724801;107729839;107729839;107735496;107735488	-;-;-;-;-	1603	0	0	0	0	0	0	0	0	0	0	0	0	0
4930466I24Rik	6;6	92012394;92016073	92014612;92016117	-;-	2264	1.98119	2.13426	2.7088	1.41817	2.11912	2.3135	2.14263	0.483249	0.268683	0.345976	0.961577	1.53864	0.876007
4930467D21Rik	5;5;5;5;5;5;5;5;5	97392417;97392447;97395370;97395370;97433911;97545558;97582216;97585853;97641940	97392507;97392507;97395495;97395495;97433971;97545609;97582285;97588125;97642179	+;+;+;+;+;+;+;+;+	2913	0	0	0	0	0	0	0	0	0	0	0	0	0
4930467E23Rik	8;8;8;8;8;8;8;8;8;8	19729576;19732706;19733648;19734698;19735703;19736581;19747761;19749416;19751632;19752158	19730002;19732820;19733821;19734780;19735861;19736633;19747797;19749477;19751665;19753527	+;+;+;+;+;+;+;+;+;+	2514	0.125715	0.153325	0.134169	0.0561501	0.0499916	0.116385	0.128259	0.188157	0.0950574	0.147217	0.184066	0.066176	0.032751
4930467K11Rik	10;10;10;10	57478381;57484138;57485039;57486183	57478668;57484367;57485074;57486353	-;-;-;-	725	0	0	0	0.076355	0	0	0	0	0	0	0	0.0828415	0
4930469B13Rik	14;14;14	19616003;19617255;19617523	19616182;19617388;19617710	+;+;+	502	0	0	0	0	0	0	0	0	0	0	0	0	0
4930469G21Rik	1;1;1;1;1	161154558;161156823;161156843;161158863;161158863	161154775;161157344;161157344;161159314;161159314	-;-;-;-;-	1192	0.463129	1.24373	0.164199	0.510848	0.131247	0.757602	0.418925	0.161973	0.656122	1.43746	0.594626	0.25193	0.252095
4930469K13Rik	11;11;11;11;11	33973961;34068071;34091560;34096752;34098516	33974278;34068229;34091647;34096845;34098554	-;-;-;-;-	698	1.08749	1.69131	1.49552	6.10676	7.99417	4.83013	3.88367	12.4473	16.1848	11.783	11.4965	19.0592	20.6215
4930470B04Rik	1	37660722	37662647	+	1926	0.716576	1.02633	0.677485	0.373648	0.189534	0.937759	0.963011	0.26732	0.270716	0.813385	0.446874	0.623677	0.374451
4930470G03Rik	13;13;13	21440471;21444071;21444922	21441781;21444193;21445934	+;+;+	2447	15.905	14.2937	12.7977	9.00377	8.74831	14.2084	12.4628	6.19377	5.4157	4.00128	8.42079	9.56004	7.29445
4930470O06Rik	8;8;8;8	59825649;59828572;59829433;59844502	59825843;59828658;59829590;59844723	+;+;+;+	662	0	0	0	0	0	0	0	0	0	0	0	0	0
4930470P17Rik	2;2	170579418;170601037	170579831;170602017	-;-	1395	0	0	0	0	0	0	0	0	0	0	0	0	0
4930471C04Rik	14;14;14;14	64099295;64102727;64103462;64104101	64099856;64102854;64103501;64104235	-;-;-;-	865	0.079776	0.126956	0	0.0639969	0.0602877	0.0696001	0	0.148803	0.200924	0.226384	0.0585297	0	0.069479
4930471C06Rik	4;4;4;4	127474848;127474934;127476633;127476633	127474950;127475304;127476840;127476840	+;+;+;+	665	0	0	0	0	0	0	0	0	0	0.147235	0	0	0
4930471D02Rik	10;10	93897158;93899920	93897195;93901956	+;+	2075	0	0	0	0	0	0	0	0	0	0	0	0	0
4930471M09Rik	6;6;6;6	91430460;91432790;91438923;91440361	91431030;91432836;91440912;91440854	-;-;-;-	2608	0.0264595	0.0210539	0	0	0	0	0.0273531	0	0.0666409	0	0.0388253	0	0.0230442
4930473A02Rik	2;2;2;2;2;2;2;2;2;2;2;2;2;2;2;2;2;2;2;2	130543791;130543791;130544361;130544361;130544936;130544936;130552139;130552139;130552353;130552353;130552842;130552842;130557623;130557623;130560690;130560690;130563654;130563654;130563692;130563732	130544117;130544117;130544558;130544558;130545065;130545065;130552242;130552242;130552435;130552435;130552916;130552916;130557784;130557784;130560923;130560923;130563687;130563749;130563727;130563749	-;-;-;-;-;-;-;-;-;-;-;-;-;-;-;-;-;-;-;-	1409	14.9865	14.9644	15.7432	16.6976	13.3241	16.7495	16.3027	10.1857	7.46265	9.24215	11.8216	11.509	14.0758
4930473D10Rik	10;10	114757747;114784723	114757851;114785104	+;+	487	0	0	0	0	0	0	0	0	0	0	0	0	0
4930474B08Rik	1	90870583	90871419	-	837	0	0	0	0.198413	0.498436	0	0	0	0	0	0.0604877	0.215269	0.21541
4930474H06Rik	12;12	71317621;71321384	71318933;71321660	-;-	1590	1.56241	1.55402	1.51821	2.54156	1.86949	2.15826	1.66004	1.49762	0.710501	0.800532	2.16523	2.07755	2.2679
4930474N05Rik	14;14;14;14;14;14;14	36094917;36094967;36095322;36095322;36096397;36098263;36098925	36095171;36095142;36095494;36095494;36096857;36098325;36100114	+;+;+;+;+;+;+	2142	0	0	0	0	0	0	0	0	0	0	0	0	0
4930477E14Rik	3;3	96401150;96401879	96401634;96402014	-;-	621	0	0	0	0	0	0	0	0	0	0	0	0	0
4930477O15Rik	5	121503513	121504601	+	1089	3.54853	3.02527	2.87567	0.965831	0.670417	1.93493	2.42375	2.18661	0.319191	0.989002	1.90611	0.992729	0.607064
4930478K11Rik	12;12;12	108313779;108322138;108327852	108314217;108322234;108328030	-;-;-	715	0.482561	0.15359	0.273742	0.309691	0	0.252605	0.698403	0.450052	0	0.136939	0.566469	0.504001	0.33622
4930478M09Rik	5	31451219	31452331	-	1113	0	0	0	0	0	0	0.128189	0.0578233	0	0	0	0	0
4930478P22Rik	5;5;5;5;5;5;5;5;5;5;5;5;5	35361541;35361553;35361559;35363936;35363936;35363936;35364737;35364737;35364737;35366180;35366465;35366842;35366842	35362191;35362643;35361625;35364034;35364034;35364034;35364770;35364770;35364770;35366263;35366903;35367677;35367441	+;+;+;+;+;+;+;+;+;+;+;+;+	2533	0	0	0	0	0	0	0	0	0	0	0	0	0
4930479D17Rik	6;6;6	146657218;146664074;146665213	146657345;146664494;146665403	+;+;+	740	0.186503	0.148402	0.617153	1.53355	1.55037	0.732212	0.482006	0.173939	0.117432	0	0	0.162325	0.406077
4930480E11Rik	X	78369643	78371128	+	1486	0	0	0	0	0	0	0	0	0	0	0	0	0
4930480G23Rik	4;4;4	19979445;19983188;19985181	19979820;19983616;19985388	-;-;-	1013	0	0	0	0	0	0	0	0.0635315	0	0.0966547	0	0.118579	0
4930480K02Rik	6	137145876	137146929	-	1054	2.48789	2.08382	2.29027	0.577733	0.940065	1.59935	2.23351	0.305301	0.0824476	0.37158	0.576412	0.740779	0.684243
4930480K15Rik	17;17;17	90861169;90862912;90866057	90861745;90863487;90867102	+;+;+	2199	0	0.0499396	0	0.0251739	0	0.164268	0.162203	0	0	0	0.0690698	0.0273125	0.0819909
4930480K23Rik	14;14;14;14;14;14;14;14	69732784;69732834;69738238;69738238;69739407;69740725;69743413;69767065	69733288;69733668;69738387;69738387;69739495;69740849;69745869;69767113	+;+;+;+;+;+;+;+	3755	0.771841	0.78963	0.416992	0.265361	0.138878	0.994049	0.683923	0.239948	0.185139	0.312899	0.458417	0.399867	0.352113
4930481A15Rik	19;19;19;19;19;19;19;19;19;19;19;19;19;19;19;19;19;19	5406740;5406762;5406815;5406822;5406874;5415008;5415008;5415008;5415012;5415607;5415607;5415607;5415607;5417394;5417394;5417394;5417394;5422121	5407083;5407083;5407083;5407083;5407083;5415112;5415112;5415099;5415021;5415812;5415812;5415812;5415812;5418251;5417587;5417580;5417683;5422847	+;+;+;+;+;+;+;+;+;+;+;+;+;+;+;+;+;+	2240	5.25249	4.4123	3.85917	1.68049	2.37464	3.93746	2.86622	1.52274	1.28022	1.31131	1.84205	2.52038	1.98543
4930481B07Rik	3;3;3;3	95015625;95016249;95016641;95019738	95016277;95016277;95017076;95020138	+;+;+;+	1490	1.34307	1.58461	0.831943	0.557289	0.524989	1.05054	0.766034	0.172772	0.524898	0.394273	0.305808	0.524014	0.605027
4930483J18Rik	15;15;15;15;15	81190774;81190853;81191817;81191817;81192174	81191005;81191005;81191875;81192756;81192763	+;+;+;+;+	1179	0	0	0.0553366	0	0	0	0	0	0	0	0	0	0
4930483K19Rik	10;10;10;10	76545871;76554976;76555203;76562113	76546800;76555063;76555307;76562226	-;-;-;-	1237	1.78513	2.75209	1.84597	1.87955	2.10788	2.3848	1.61474	1.56081	1.61576	1.9788	2.98776	2.91318	0.777356
4930483O08Rik	7;7;7	133128251;133130178;133141744	133128433;133130310;133142457	+;+;+	1030	0.200989	0.159928	0.0633416	0.10749	0	0.0584506	0.0692591	0.0624829	0.168737	0.0950594	0.0983071	0.291554	0.116698
4930486I03Rik	1;1;1	20356452;20381095;20391892	20356705;20381219;20392300	+;+;+	788	0.175143	0.0696809	0.165588	0.0702504	0	0.0764011	0	0	0	0	0.0642489	0	0.228805
4930486L24Rik	13;13;13;13;13;13;13;13	60842621;60844309;60845080;60853100;60853516;60853756;60854813;60864322	60842976;60844426;60845242;60853324;60853662;60853878;60854949;60864416	-;-;-;-;-;-;-;-	1364	4.03464	3.54249	3.12099	2.32347	3.34533	2.33931	3.63484	2.90174	3.10584	3.15843	3.15498	3.03823	1.7294
4930486N12Rik	7	121258764	121259395	-	632	0	0	0	0	0	0	0	0	0	0	0	0	0
4930487D11Rik	5;5;5	38344435;38345416;38349041	38344494;38345493;38349197	+;+;+	295	0	0	0.221159	0	0.353552	0.204082	0	0.218161	0	0.663805	0	0	0.407453
4930488B22Rik	1;1;1	184712497;184713406;184718179	184713294;184713518;184718989	+;+;+	1722	0	0	0	0	0	0	0	0	0	0	0	0	0
4930488N24Rik	17	14104924	14106450	-	1527	0	0	0	0	0	0	0	0	0	0	0	0	0
4930500F04Rik	5;5;5;5;5;5;5;5;5	149847747;149847965;149848424;149848424;149852299;149852791;149852791;149864091;149864091	149847980;149847980;149848472;149848472;149852462;149854405;149852893;149864276;149864280	+;+;+;+;+;+;+;+;+	2252	0	0	0	0	0	0	0	0	0	0	0.0224814	0	0
4930500F10Rik	9;9	106247960;106248304	106248073;106249413	+;+	1224	0.394644	0.17944	0.0533022	0.226133	0.298237	0.196745	0.407973	0.630955	0.922955	0.959914	0.206814	0.686962	0.540109
4930500L23Rik	5;5;5;5	139523749;139526658;139537280;139541142	139523934;139526892;139537407;139541339	+;+;+;+	747	0	0	0	0	0	0	0	0	0	0	0	0	0
4930500M09Rik	1;1	170214860;170214860	170216422;170215556	+;+	1563	4.54744	3.51302	2.54623	3.32923	2.83599	2.69628	3.28615	3.04699	1.72354	2.25515	3.1096	2.88196	2.46088
4930502C17Rik	3	33956200	33957147	+	948	0	0	0	0	0	0	0	0	0	0	0	0	0
4930502E09Rik	11;11;11	84829178;84829902;84830490	84829412;84830042;84830868	+;+;+	755	0.822591	0.581813	0.172826	0.293284	1.03607	0.558184	0.566916	1.19338	1.72648	1.5562	0.670572	1.2728	0.955222
4930502E18Rik	X;X;X;X;X	53724826;53727367;53733727;53736275;53737666	53725048;53727548;53733859;53736387;53738441	+;+;+;+;+	1427	0.0483576	0.0384783	0	0.0775856	0	0.126568	0.0999817	0.135299	0	0	0	0	0
4930503B20Rik	3;3;3;3;3;3;3	146645193;146646257;146647254;146648225;146649566;146650475;146650475	146646429;146646429;146647366;146648306;146649694;146651315;146651317	-;-;-;-;-;-;-	2404	0.100467	0.091362	0.0542777	0.138163	0.162694	0.200346	0.0296743	0.0936984	0.234962	0.183278	0.02106	0.0999336	0.174998
4930503E14Rik	14;14;14;14	44163169;44169166;44170282;44171174	44163962;44169297;44170444;44171371	-;-;-;-	1287	0	0	0	0.0430127	0	0.0467786	0	0	0	0	0	0	0
4930503H13Rik	X;X	156539151;156539492	156539246;156540120	+;+	725	0	0	0	0	0	0	0	0	0	0	0	0	0
4930503L19Rik	18;18;18;18;18;18;18;18;18;18;18;18;18;18;18;18;18;18;18;18;18;18;18;18;18;18;18;18;18;18;18;18;18;18;18;18;18;18;18;18;18;18;18;18;18;18;18;18;18;18;18	70452212;70452213;70453140;70453194;70453194;70453194;70453194;70453271;70456474;70456474;70456474;70456474;70456474;70456474;70458317;70458317;70458317;70458317;70458317;70463962;70463962;70463962;70463962;70463962;70463962;70463962;70467331;70467331;70467335;70467335;70467335;70467335;70467335;70467759;70467759;70467759;70468054;70468221;70469449;70469449;70469449;70469449;70469449;70469494;704…	70453388;70453388;70453388;70453388;70453388;70453388;70453388;70453388;70456544;70456544;70456544;70456544;70456544;70456544;70458448;70458448;70458448;70458448;70458448;70464064;70464064;70464064;70464064;70464064;70464150;70464064;70467456;70467485;70467485;70467485;70467485;70467485;70468517;70468517;70468517;70468517;70468517;70468517;70469777;70469754;70469754;70469777;70469777;70469754;704…	-;-;-;-;-;-;-;-;-;-;-;-;-;-;-;-;-;-;-;-;-;-;-;-;-;-;-;-;-;-;-;-;-;-;-;-;-;-;-;-;-;-;-;-;-;-;-;-;-;-;-	3611	6.32542	5.9151	6.35977	6.56899	6.48431	7.72767	7.90218	2.88726	2.55092	4.4197	3.35091	3.90033	5.50897
4930503O07Rik	1;1;1	194212187;194215011;194222429	194212336;194215107;194222759	-;-;-	578	0	0	0	0	0	0	0	0	0	0	0	0	0
4930504D19Rik	6;6	84535876;84536237	84536139;84536321	+;+	349	0	0	0	0	0	0	0	0	0	0	0	0	0
4930504O13Rik	11;11;11;11	58446149;58447321;58452400;58452896	58446401;58447497;58452490;58452923	-;-;-;-	549	0	0	0	0	0	0	0	0	0	0	0	0	0
4930505A04Rik	11;11;11;11;11;11;11;11;11;11;11	30426006;30426006;30427054;30427054;30446227;30446227;30454146;30454671;30454671;30471742;30471742	30426364;30426364;30427169;30427169;30446380;30446380;30454212;30454878;30454878;30471827;30471808	-;-;-;-;-;-;-;-;-;-;-	990	0.697033	0.665558	0.79081	0.111833	0.105351	0.729747	0.504402	0.52006	0.614443	0.494501	0.613675	0.424667	0.0607064
4930505G20Rik	14;14;14;14	115396551;115404917;115408764;115409506	115396796;115405046;115408901;115409552	-;-;-;-	561	0	0	0	0	0	0	0	0	0	0	0	0	0
4930505K14Rik	5;5;5	148777963;148780368;148782894	148778221;148780436;148783080	+;+;+	515	0	0	0	0	0	0	0	0	0	0	0.0983071	0	0
4930505M18Rik	7;7	37669799;37671162	37669900;37672347	+;+	1288	0	0	0.0506536	0	0.0404883	0	0	0	0	0	0	0	0
4930505N22Rik	19;19	45998137;46013025	45998719;46013386	+;+	945	1.38743	1.04588	1.31174	1.17158	1.65552	1.40158	1.13233	1.15775	0.643702	0.725268	1.01792	1.46178	1.27194
4930505O20Rik	8;8	80511842;80514372	80513497;80514473	-;-	1758	0	0	0	0	0	0	0	0	0	0	0	0	0
4930506C21Rik	17;17;17;17;17;17;17;17;17	8293366;8293945;8296953;8297029;8297509;8298268;8298480;8311017;8311017	8293733;8294076;8297243;8297243;8298637;8298416;8298637;8311052;8311080	-;-;-;-;-;-;-;-;-	1984	7.91276	8.3719	8.45119	8.06365	5.86149	8.54722	9.41439	12.3914	9.65051	9.04741	11.5853	8.5519	7.9668
4930507D05Rik	10	62449489	62451322	+	1834	0.827774	0.838299	0.355735	0.754599	0.739297	0.78784	0.50566	0.877282	1.27933	1.22789	0.690133	0.785955	0.917547
4930507D10Rik	11;11;11	80850381;80851553;80858128	80851231;80851680;80858300	-;-;-	1152	0	0	0	0	0	0	0	0	0	0	0	0.0521355	0
4930509E16Rik	9;9;9	72518250;72522201;72531810	72519290;72522301;72531858	-;-;-	1191	0	0.276617	0.328674	0	0.0437858	0	0.0598967	0.0540364	0	0.0822093	0.0850179	0	0.0504613
4930509G22Rik	16;16;16;16	11178176;11179635;11180133;11191482	11179512;11179771;11180328;11192292	+;+;+;+	2481	0.375488	0.553291	0.552228	0.423938	0.357328	0.582385	0.833846	0.544742	0.665496	0.276251	0.346908	0.774657	0.678268
4930509H03Rik	3	104510099	104511313	-	1215	1.2495	1.22019	0.912849	0.956794	1.0301	1.38742	1.82012	0.582659	0.357612	1.20878	1.04173	1.06279	1.92912
4930509J09Rik	3;3;3;3;3;3;3;3	73351206;73359986;73361969;73363178;73389238;73390305;73478312;73481540	73351826;73360127;73362149;73363295;73389425;73390403;73478376;73481651	-;-;-;-;-;-;-;-	1526	0	0	0	0	0	0	0	0	0	0	0	0	0
4930509K18Rik	4;4;4	40313232;40315828;40316669	40313907;40315910;40317719	+;+;+	1810	0	0	0	0.0305842	0.0288115	0	0	0.0711131	0.0480109	0.0540946	0	0.199094	0.265633
4930510E17Rik	9;9	53264615;53279520	53264787;53280985	+;+	1639	0	0.0670025	0.0398059	0	0	0.0367322	0	0	0	0	0	0	0
4930511A02Rik	12;12;12;12	11438233;11440860;11442949;11443259	11438319;11441018;11443083;11444812	+;+;+;+	1935	0	0	0	0	0	0	0	0.0332596	0	0	0	0	0
4930511E03Rik	6;6;6;6;6;6;6;6	94943834;94944357;94946140;94946706;94948678;94948913;94950016;94950573	94943902;94944528;94946308;94947035;94948792;94949261;94950070;94951545	+;+;+;+;+;+;+;+	2232	0.0309168	0	0	0	0	0	0	0	0	0	0	0	0
4930511M06Rik	18;18;18;18;18;18;18;18;18;18;18;18;18;18;18;18	57373455;57434863;57506001;57545361;57546014;57547762;57548279;57548279;57548279;57549084;57549084;57551695;57551747;57552107;57552107;57552107	57373841;57434981;57506159;57545865;57548375;57548375;57548375;57548375;57548375;57549236;57549236;57551776;57551879;57552397;57552395;57552201	-;-;-;-;-;-;-;-;-;-;-;-;-;-;-;-	4161	0.306805	0.356292	0.331462	0.17295	0.275721	0.390654	0.308595	0.123734	0.125306	0.258838	0.0973385	0.187643	0.447748
4930511M18Rik	3;3;3;3;3;3	92102578;92104205;92104727;92105434;92110771;92142653	92102726;92104308;92104850;92105580;92110841;92142736	-;-;-;-;-;-	679	0	0	0	0	0	0	0	0	0	0	0	0	0
4930511O05Rik	13;13;13	27292616;27302005;27305780	27292670;27302087;27306032	+;+;+	391	0	0	0	0	0	0	0	0	0	0	0	0	0
4930512B01Rik	12;12;12;12;12;12;12;12;12;12	69790288;69790335;69792181;69793990;69802073;69821819;69824845;69827307;69835939;69840367	69791399;69790451;69792404;69794511;69802202;69821872;69825124;69827500;69836033;69840479	+;+;+;+;+;+;+;+;+;+	2724	2.65993	2.76155	2.17952	1.9306	1.89528	2.93948	2.67121	1.93734	2.36071	2.3723	2.23032	2.02846	1.45615
4930512H18Rik	8;8;8;8;8	61849006;61851410;61913060;61921571;61921571	61849092;61851551;61913177;61922834;61922834	+;+;+;+;+	1611	0.257007	0.374919	0.485973	2.37099	1.9746	0.336336	0.442811	5.03354	4.90868	4.80136	2.04273	2.386	3.58134
4930512M02Rik	11;11;11;11;11;11;11	11589223;11590052;11623711;11624643;11624643;11627387;11627387	11589362;11590119;11623924;11624711;11624711;11627824;11627835	-;-;-;-;-;-;-	940	0	0	0	0	0	0	0	0	0.0924465	0	0	0	0
4930512P04Rik	3	116663732	116664155	+	424	0.488252	1.81302	0.615489	0.652799	0.737956	0.993936	1.00948	0.758931	1.22971	2.0783	2.14931	1.55816	0.708719
4930513D17Rik	5;5;5;5;5;5;5;5;5;5;5;5;5;5;5;5	39461749;39462565;39462728;39476985;39476991;39476991;39486953;39509653;39509653;39509653;39538878;39538878;39538878;39603484;39603484;39603484	39462297;39462873;39462873;39477122;39477122;39477122;39487037;39509829;39509829;39509829;39538984;39538984;39538984;39603529;39603574;39603531	-;-;-;-;-;-;-;-;-;-;-;-;-;-;-;-	1456	0.0473944	0.0377119	0	0.0380202	0	0	0	0.176806	0.358103	0.806961	0	0	0.041277
4930513N10Rik	8;8;8;8;8;8;8;8;8	95806744;95806830;95806973;95809033;95810231;95810231;95816368;95821423;95821423	95810700;95809180;95810201;95809180;95810297;95810297;95816446;95821697;95821728	+;+;+;+;+;+;+;+;+	4342	1.58927	1.32782	1.5176	1.16656	1.63341	1.49748	1.23221	1.15612	1.39096	1.30789	1.21848	1.44548	1.35646
4930513N20Rik	7	130653128	130654392	-	1265	2.72752	2.56095	1.03149	1.0065	0.824488	1.61813	1.35343	1.32276	1.03043	1.8576	0.800445	0.474783	0.76015
4930513O06Rik	X;X;X;X	139086243;139090685;139091611;139093262	139086395;139091050;139091751;139093405	+;+;+;+	804	0	0.136588	0	0	0.0648618	0.0748807	0	0.24014	0	0	0.125941	0	0
4930515B02Rik	4;4;4	140872693;140877541;140877864	140872864;140877767;140878055	+;+;+	591	0	0	0	0.0936673	0	0	0	0	0.294077	0.16567	0	0.101625	0
4930515G01Rik	5	114773737	114774983	-	1247	2.4902	3.17034	2.1974	1.7313	2.40462	1.30354	1.83062	2.42566	1.95124	1.25628	3.5728	3.13064	1.976
4930515G13Rik	17;17;17	21801159;21801202;21801260	21801197;21801255;21801658	-;-;-	492	0	0	0	0	0	0	0	0	0	0	0.102903	0	0
4930515G16Rik	6	67565191	67566446	-	1256	0	0.043717	0	0	0.0415198	0	0	0.05124	0.207563	0.15591	0.0806181	0.0478185	0
4930515L19Rik	X;X;X	46267559;46327610;46328811	46268110;46327725;46328911	-;-;-	769	0	0	0	0	0	0	0	0	0	0	0	0	0
4930516B21Rik	9;9;9;9	119440278;119441828;119444271;119444693	119441099;119441913;119444419;119444830	-;-;-;-	1195	5.02389	4.45701	5.0774	2.03826	1.48373	2.87166	4.6563	1.50796	0.581756	0.737407	1.56757	0.804152	0.502924
4930516K23Rik	7;7;7;7;7;7;7;7	103998800;104004069;104012485;104023187;104025451;104059594;104112111;104137346	103999046;104004200;104012728;104023341;104025573;104059635;104112185;104137405	-;-;-;-;-;-;-;-	1078	0	0	0	0	0	0	0	0	0	0	0	0	0
4930517E11Rik	2;2;2	124123636;124125333;124129932	124124976;124125423;124129956	-;-;-	1457	0.0947238	0.037686	0.0447782	0.0759881	0.143168	0.0826412	0	0.0883423	0.119286	0.134401	0.0694965	0	0.0824974
4930517G19Rik	6	91689933	91691608	-	1676	1.89397	2.91579	2.49134	2.77447	3.60935	3.62805	2.29845	2.26556	2.69617	2.3952	1.72184	3.33269	4.98437
4930517J16Rik	4	44669330	44670897	+	1568	0	0	0	0	0	0	0	0	0	0	0	0	0
4930517L18Rik	18;18	37618906;37619387	37619007;37619766	+;+	482	0	0	0	0	0.108193	0.124905	0	0.133522	0.36058	0.406271	0	0.124606	0
4930517O19Rik	14;14;14;14;14;14;14;14;14;14;14;14	100213142;100213189;100213189;100213413;100232651;100232651;100244604;100244604;100244606;100245219;100245219;100246082	100213168;100213541;100213541;100213541;100232772;100232767;100244809;100244821;100244809;100245339;100245339;100246280	+;+;+;+;+;+;+;+;+;+;+;+	1040	1.06163	2.05907	1.81924	1.27748	1.40401	1.73666	1.95491	0.556939	1.00269	0.941454	0.53549	0.577501	0.577878
4930518C09Rik	5;5	48003065;48005488	48003322;48005707	-;-	478	1.87674	1.95282	2.04734	2.2004	4.47302	4.5342	2.38785	0.807833	0.181799	0.204835	0.95325	1.13084	2.76608
4930518I15Rik	2	156856616	156857946	-	1331	2.02197	3.96035	2.74496	3.24408	2.89934	5.11124	3.0818	2.29675	2.21983	2.64824	2.90988	4.82827	6.09573
4930518I17Rik	15	32226385	32227040	+	656	0	0.0837021	0.099454	0	0	0	0.217491	0	0	0	0	0	0
4930518J20Rik	1	156303489	156304966	+	1478	0	0.0743012	0	0	0.0352834	0.0407335	0.0482658	0	0	0	0	0.0406361	0.0813252
4930518J21Rik	8;8;8	56465622;56471775;56484777	56465794;56471982;56484968	-;-;-	573	0	0	0	0	0	0	0	0	0	0	0	0	0
4930519A11Rik	12;12	12902720;12906064	12902927;12907251	+;+	1396	0	0	0	0	0	0	0	0	0	0	0	0	0
4930519D14Rik	13;13;13;13	30615043;30615762;30621195;30623886	30615073;30615956;30621731;30624259	+;+;+;+	1137	0	0	0	0.0486872	0	0	0	0	0	0	0	0	0
4930519E07Rik	5	41281236	41282900	+	1665	0	0	0	0	0	0	0	0	0	0	0	0	0
4930519F09Rik	10;10;10;10	28880921;28921957;28921961;28922734	28881103;28922293;28922395;28923507	-;-;-;-	1396	0	0	0	0	0	0	0	0	0	0	0.0181333	0	0
4930519F16Rik	X;X;X;X;X;X;X;X;X;X;X;X;X;X;X;X;X;X;X;X;X;X;X;X;X;X;X;X	103182971;103230028;103230028;103230028;103230094;103231382;103232802;103232802;103232802;103232922;103232933;103234022;103234022;103234022;103234022;103234022;103234022;103234022;103253004;103255824;103255824;103255824;103256519;103256519;103256519;103287873;103298177;103311633	103183283;103230174;103230174;103230174;103230174;103232941;103232941;103232941;103232941;103232941;103232941;103234269;103234269;103234269;103234269;103234269;103234269;103234269;103253047;103255992;103255992;103255992;103256606;103256614;103256614;103288078;103298310;103311782	-;-;-;-;-;-;-;-;-;-;-;-;-;-;-;-;-;-;-;-;-;-;-;-;-;-;-;-	3067	0	0	0	0.0360987	0	0.0196296	0	0.0629515	0.198337	0	0	0.0391654	0
4930519F24Rik	9;9;9;9;9;9	100022300;100023648;100023674;100028000;100034551;100034551	100022679;100023750;100023750;100028138;100034672;100034650	+;+;+;+;+;+	744	0	0	0	0	0	0	0	0	0	0	0	0	0
4930519G04Rik	5;5;5;5;5;5;5;5;5;5;5;5;5;5;5;5;5;5;5;5;5;5;5;5;5;5;5;5;5;5;5;5;5;5	114853664;114857322;114859710;114860806;114861591;114861591;114863465;114863465;114863499;114865470;114870155;114870155;114870155;114870155;114870719;114870719;114870719;114870719;114872528;114872528;114872528;114872528;114874280;114874280;114874280;114874280;114876217;114877965;114877965;114877965;114879509;114879509;114879509;114882795	114853858;114857372;114860985;114860985;114861644;114861644;114863549;114863549;114863549;114865592;114870265;114870265;114870265;114870265;114870810;114870810;114870810;114870810;114872552;114872552;114872552;114872552;114874348;114874348;114874348;114874348;114876702;114878018;114878018;114878018;114879765;114879765;114879598;114883880	+;+;+;+;+;+;+;+;+;+;+;+;+;+;+;+;+;+;+;+;+;+;+;+;+;+;+;+;+;+;+;+;+;+	3964	0	0.069259	0.0164586	0.297874	0.21049	0.0759386	0.0179962	0.438358	2.1703	0.741003	0.306528	0.666661	0.636774
4930519H02Rik	5;5;5;5;5;5;5;5;5;5	15863928;15867204;15867271;15869876;15869876;15870120;15870120;15874975;15883592;15883592	15864052;15867388;15867388;15869980;15869980;15870209;15870209;15875329;15883829;15883766	-;-;-;-;-;-;-;-;-;-	1098	0	0	0	0	0	0	0	0	0	0	0	0	0
4930519L02Rik	3;3;3;3;3;3;3;3	143017660;143019053;143020862;143024100;143030614;143038171;143040502;143040502	143017720;143019140;143020916;143024167;143030957;143038194;143040681;143040752	+;+;+;+;+;+;+;+	891	0	0.123252	0	0.0621295	0	0.202707	0	0	0	0.109889	0	0	0
4930519P11Rik	2	154612937	154613437	-	501	0.413211	0.876783	0.520893	0.773456	0.312269	0.360504	0	0.385374	0	0	0.404217	0.839163	0.119959
4930520M14Rik	5;5	139215469;139215958	139215770;139216356	-;-	701	2.06723	2.89817	0.837627	1.65835	1.48784	2.92003	2.03529	0.734464	1.23965	0.838042	2.38335	1.5422	1.54321
4930520O04Rik	9;9;9;9;9;9;9;9;9	114368303;114368324;114368416;114368844;114368989;114368989;114368989;114376258;114376258	114368484;114368484;114368899;114368899;114369063;114371164;114369063;114377229;114376446	+;+;+;+;+;+;+;+;+	3745	0.276394	0.454517	0.48779	0.310415	0.264574	0.385821	0.247632	0.532731	0.371267	0.575179	0.47316	0.304711	0.320958
4930521E06Rik	1;1;1	44739676;44744156;44744932	44740481;44744236;44744949	-;-;-	905	0.53375	0.849414	0.576724	0.183505	0.288115	1.72962	1.49768	0.426679	0	0.108189	0.223771	0.597283	0.0664081
4930522H14Rik	4;4;4;4;4;4;4;4;4;4	109505337;109505365;109514829;109514829;109524322;109524322;109527937;109527937;109531096;109531212	109505825;109505825;109514865;109514865;109524457;109524457;109528042;109528042;109531204;109531297	-;-;-;-;-;-;-;-;-;-	963	0	0	0	0	0	0	0	0	0.0902386	0	0.0525734	0	0
4930522L14Rik	5;5;5;5;5;5;5	109735990;109738831;109738950;109739199;109739199;109751595;109751595	109737799;109739010;109739010;109739325;109739325;109751886;109751597	-;-;-;-;-;-;-	2409	2.59497	2.47442	3.54213	1.64303	1.03908	3.36958	3.17981	1.21101	0.559131	1.13397	1.87045	1.83671	1.48864
4930522N08Rik	5;5	99682999;99684824	99683703;99685034	+;+	916	0	0.119888	0	0	0	0.13145	0.0778787	0	0.0948687	0	0.0552709	0	0
4930522O17Rik	4;4;4	53246196;53247387;53251018	53246409;53247521;53251115	+;+;+	447	1.38939	0.737028	1.45955	0.123842	0	0.976465	1.91509	0.287953	0.388813	0	0	0	0.268901
4930523C07Rik	1;1;1;1;1;1;1;1;1;1;1;1;1;1;1;1	160044382;160044384;160044384;160044405;160044447;160044933;160070123;160070700;160070700;160070700;160070700;160071427;160071427;160071427;160075031;160075162	160047828;160044753;160044753;160044753;160044753;160045025;160070232;160070803;160070803;160070803;160070803;160071509;160072782;160071540;160080208;160075461	+;+;+;+;+;+;+;+;+;+;+;+;+;+;+;+	10195	12.1159	9.49792	9.5479	7.257	5.87474	8.05377	9.30634	17.7638	13.5229	12.5426	11.4863	7.62313	5.68866
4930524B15Rik	11;11;11;11;11	31965592;31973556;31975037;31976786;31978242	31965951;31973641;31975135;31976830;31979651	+;+;+;+;+	2000	0	0	0	0.0276787	0	0	0	0	0.0434499	0.0489556	0.0253141	0	0
4930524B17Rik	6;6;6;6;6	19247899;19268764;19269819;19277293;19278707	19249365;19268795;19270008;19277336;19278843	-;-;-;-;-	1870	0	0	0	0	0	0	0	0	0	0	0	0	0
4930524J08Rik	5	99979061	99979663	+	603	0.114438	0.273177	0.324586	0.550819	0.778341	0.499205	0.591517	0.213457	0.720562	0.487121	0.0839605	0.298806	0.697671
4930524N10Rik	X;X;X	154339225;154342788;154343327	154340013;154342851;154343392	-;-;-	919	0	0	0	0	0	0	0	0	0	0	0	0	0
4930524O07Rik	9;9;9;9;9	106891547;106892171;106892613;106893448;106895112	106893835;106892834;106892834;106893833;106895182	+;+;+;+;+	2360	5.17547	4.16467	4.64434	8.04558	7.09313	3.18878	3.26457	2.72701	2.98258	2.53076	7.35825	7.27847	4.30373
4930524O08Rik	9;9;9;9;9;9;9;9;9;9;9;9;9;9	89826519;89826944;89826982;89830392;89830392;89830392;89833574;89833574;89833574;89838148;89838148;89856404;89858389;89863809	89827237;89828505;89827338;89830596;89830596;89830596;89833694;89833694;89833694;89838320;89838978;89856513;89858464;89864028	+;+;+;+;+;+;+;+;+;+;+;+;+;+	3550	0	0	0	0	0	0.0169589	0	0.0181288	0.0244788	0	0.0142615	0	0.0169294
4930525G20Rik	13;13;13	67796594;67818061;67830835	67796712;67820777;67830985	-;-;-	2987	0.600657	0.643388	0.393155	0.555983	0.314255	0.725593	0.429884	0.237004	0.290926	0.196675	0.406788	0.522786	0.503008
4930526A20Rik	17;17	28075050;28075415	28076677;28076355	-;-	1628	0.847743	1.48402	0.901684	0.374036	0.352357	1.07243	0.7011	0.296487	0.854051	0.721704	0.435377	0.811623	0.442993
4930526F13Rik	13;13	54926763;54930150	54928376;54930256	-;-	1721	0	0	0	0	0	0	0	0.0373953	0.151481	0	0	0.0697967	0
4930526L06Rik	19;19;19	11196817;11292640;11299186	11196964;11292812;11299886	+;+;+	1022	0	0	0.0638374	0.108331	0.102053	0	0.0698013	0.125944	0	0	0	0	0
4930526M16Rik	5	64468057	64469010	+	954	0	0	0	0.0580266	0	0	0	0	0	0.102632	0	0	0
4930527A07Rik	2;2	105476501;105477154	105476855;105477357	+;+	559	0	0	0	0	0	0	0	0	0	0	0	0	0
4930527B05Rik	11;11;11	81385013;81401638;81402292	81385269;81401782;81402491	+;+;+	602	0	0	0	0	0	0	0.1185	0	0	0	0	0	0
4930527E20Rik	2;2	30803793;30807254	30803967;30807429	+;+	351	0.589797	0.938608	0.371748	0.157713	0	1.02913	0	0	0	0	0.14424	0.684445	0.171223
4930527J03Rik	1;1;1	178276047;178276093;178276508	178276641;178276503;178276639	-;-;-	595	0	0	0	0	0.17529	0	0	0.108164	0	0	0	0	0
4930528D03Rik	13;13;13;13;13	59733645;59733650;59733936;59733936;59737194	59733708;59733708;59735210;59734838;59737470	+;+;+;+;+	1616	0	0.0339781	0.121117	0.0685116	0	0	0	0	0.161324	0	0	0	0.0371902
4930528G23Rik	6;6;6;6	148659978;148666772;148668145;148677440	148660909;148666917;148668228;148678000	-;-;-;-	1723	0	0	0	0	0	0	0	0	0	0	0	0	0
4930528J11Rik	6	29912023	29915633	-	3611	0.745291	0.547413	0.867241	0.306604	0.187742	0.666897	1.06679	0.0980243	0.0481306	0	0.280411	0.216223	0.382798
4930528P14Rik	2;2;2	115329264;115333600;115344189	115329595;115333684;115344280	-;-;-	509	0	0	0	0	0	0	0	0	0	0	0	0	0
4930529C04Rik	3	91071662	91075195	+	3534	0.104076	0.0362017	0.0553836	0.113566	0.183274	0.106473	0.163102	0.0606424	0.00614741	0.0900429	0.0906837	0.0849747	0.104927
4930529I22Rik	2;2	169399145;169405417	169399699;169405450	-;-	589	0	0	0	0	0	0	0	0	0	0	0	0	0
4930532G15Rik	1;1;1	185359461;185361409;185362576	185359869;185362865;185362865	-;-;-	1866	0.147923	0.0882774	0.192299	0.0296663	0.0838406	0.193582	0.0764597	0.068979	0.0931401	0.209885	0.13566	0.160933	0.193246
4930532M18Rik	1;1;1;1;1;1	154255689;154257003;154263054;154263054;154270092;154270092	154255761;154257307;154263136;154263136;154270237;154270416	+;+;+;+;+;+	786	0	0	0	0	0	0	0	0	0	0	0	0	0
4930533B01Rik	2;2;2;2;2;2	113691053;113694503;113695018;113698805;113700061;113708411	113691338;113694643;113695248;113698915;113700180;113708550	-;-;-;-;-;-	1029	0.402369	0.426889	0.317016	0.699364	0.60815	0.936118	0.554612	0.312718	0.675605	0.951518	0.393611	0.642042	1.51855
4930533D04Rik	9;9	102692885;102693133	102692970;102693834	+;+	788	0.175143	0	0.0827942	0.210751	0	0	0.181058	0.0816718	0.220558	0	0.0642489	0.0762184	0.152536
4930533I22Rik	6;6;6;6;6;6;6	57476697;57478442;57481995;57484239;57485172;57485773;57495555	57476790;57478469;57482085;57484345;57485213;57485857;57497671	+;+;+;+;+;+;+	2564	0	0.0214152	0	0.0215902	0.0203389	0.0234805	0	0	0	0.0381869	0	0.0117122	0
4930533K18Rik	10;10;10;10;10;10;10	70868669;70872090;70875226;70923296;70923342;70925112;70933856	70868812;70872250;70875366;70923336;70923532;70925223;70934324	+;+;+;+;+;+;+	1259	8.33118	6.1058	8.00625	6.90318	3.68646	6.52729	7.53599	6.69644	5.17671	5.91045	6.59493	5.96308	6.75461
4930533L02Rik	7	125318359	125319518	+	1160	0.0594882	0	0	0	0	0	0	0	0	0	0	0	0
4930533P14Rik	1;1;1	96612057;96615019;96662419	96612331;96615171;96662573	-;-;-	583	0	0	0	0	0	0	0	0	0	0	0	0	0
4930534D22Rik	3;3	131302643;131314599	131303294;131316661	+;+	2715	0.177917	0.182017	0.0720904	0.0407789	0.0576231	0.110873	0.236476	0.118522	0.35208	0.252441	0.111885	0.0442432	0.0664081
4930535E02Rik	3;3	68759906;68761362	68760488;68761433	-;-	655	0	0	0	0	0	0	0	0	0	0	0	0	0
4930535G08Rik	1;1	36011072;36011594	36011195;36011894	+;+	425	0	0	0	0	0	0	0	0	0	0	0	0	0
4930535I16Rik	4	123917504	123918022	-	519	6.24912	7.29998	6.66246	8.3196	6.63165	4.17601	7.14744	8.68019	9.04159	3.8674	8.38925	9.37354	8.10589
4930535L15Rik	9;9;9;9	107998116;107998624;107999345;108002276	107998347;107998721;107999421;108002404	-;-;-;-	536	4.63475	9.11728	1.70408	5.99016	1.94585	6.73926	1.73019	3.84223	18.6445	20.8244	6.42298	5.37852	2.24251
4930535O05Rik	8;8	87458444;87459159	87458585;87459435	+;+	419	0	0	0	0	0	0	0	0	0	0	0	0	0
4930537H20Rik	3	90292301	90293983	-	1683	2.70613	3.55617	3.95405	2.86161	3.09857	3.82759	3.77242	4.32108	4.38888	4.30507	3.82043	4.60354	3.21387
4930538E20Rik	11;11;11;11;11	24160528;24166873;24168609;24172666;24172666	24160914;24167062;24168799;24172781;24172824	-;-;-;-;-	927	0.297762	0.177698	0.281518	0.298583	0.393789	0.324725	0.615637	0.0694254	0.093743	0.211243	0.491536	0.323949	0.518657
4930538K18Rik	4;4;4;4;4;4;4;4;4;4;4;4;4;4	119205055;119205107;119209217;119209217;119209946;119209946;119210875;119210875;119214020;119214020;119217112;119217112;119218103;119218103	119205795;119205795;119209420;119209420;119210089;119210089;119210972;119210972;119214149;119214149;119217183;119217183;119218217;119218217	-;-;-;-;-;-;-;-;-;-;-;-;-;-	1504	0.435877	0.474609	0.325342	0.202437	0.10402	0.460337	0.521746	0.149768	0.144448	0.227852	0.100987	0.179701	0.0599395
4930539C22Rik	3;3;3;3;3;3;3;3;3	134404143;134404818;134405879;134419454;134419641;134420028;134420941;134422486;134423544	134404319;134404903;134405975;134419511;134419748;134420210;134421023;134422571;134423635	-;-;-;-;-;-;-;-;-	970	0	0	0	0	0	0	0	0	0	0	0	0	0
4930539E08Rik	17;17;17;17;17;17;17;17;17;17;17;17	28896397;28899483;28901131;28901950;28902773;28903247;28904516;28905255;28905691;28908268;28909292;28915169	28898923;28899746;28901195;28902075;28903022;28903308;28904650;28905495;28905755;28908387;28909872;28915324	-;-;-;-;-;-;-;-;-;-;-;-	4592	0	0.0239149	0.0142077	0.0602759	0.124921	0.0393319	0.015535	0.0840907	0.189242	0.277188	0.0661518	0.156951	0.157054
4930539J05Rik	3;3;3;3;3	135436209;135436226;135436535;135436535;135438421	135436406;135436406;135436602;135437759;135438665	-;-;-;-;-	1668	5.02654	5.0695	5.74973	9.59129	7.69102	5.0892	4.83278	8.2183	8.04031	8.04187	8.55944	7.5554	5.90292
4930539M17Rik	3;3;3	9061964;9065125;9070625	9062152;9065331;9071074	+;+;+	846	0	0	0	0	0	0	0	0	0	0	0	0	0
4930540E01Rik	9	100173001	100174146	-	1146	0	0	0	0	0	0	0	0	0	0	0	0	0
4930540M05Rik	6;6;6	119896159;119900931;119901226	119896588;119901140;119902653	-;-;-	2068	0.0333686	0.0531031	0.0630966	0.0267685	0.0252171	0.0291122	0	0.155603	0.252127	0.0946917	0.122409	0.0290426	0.0290616
4930542C12Rik	9	78394956	78396158	-	1203	0.0573618	0	0.0542326	0.23008	0.086698	0.050045	0.0592992	0.0534974	0	0	0	0	0
4930542C16Rik	14;14;14;14;14;14;14;14;14	24597266;24599003;24603387;24606297;24606704;24615118;24617010;24617010;24617010	24597759;24599068;24603505;24606366;24606858;24615912;24617311;24617467;24617304	-;-;-;-;-;-;-;-;-	2157	0	0	0.0302466	0	0	0	0	0	0	0	0	0	0
4930543E12Rik	7;7;7;7;7;7;7;7;7;7;7	113100168;113100234;113102051;113102051;113102652;113112748;113112748;113140894;113140894;113141819;113141997	113101138;113101138;113102077;113102077;113102749;113112853;113112853;113140989;113140989;113142015;113142023	-;-;-;-;-;-;-;-;-;-;-	1503	0	0	0	0	0	0	0	0	0.0578175	0.130288	0	0	0
4930544D05Rik	11;11;11;11;11;11;11;11;11;11;11;11;11;11;11	70615848;70615894;70615897;70615910;70616104;70616104;70616104;70616104;70616379;70616398;70616398;70616758;70616758;70616758;70616758	70616004;70616004;70616004;70616004;70616304;70616304;70616304;70616676;70616564;70616605;70616676;70616890;70616877;70616870;70616875	+;+;+;+;+;+;+;+;+;+;+;+;+;+;+	863	0	0.254501	0.226797	0.12829	0.422992	0.558091	0.0826616	0	0.20139	0	0.410657	0.347973	0.13928
4930544G11Rik	6	65952609	65954014	+	1406	0	0	0	0	0	0	0	0	0	0	0.0360087	0	0
4930544I03Rik	12;12;12;12;12	90753208;90841287;90855970;90925348;90969590	90753900;90841436;90856091;90925479;90969768	-;-;-;-;-	1276	0.00757122	0.0860636	0.05113	0	0	0	0.111813	0	0.20431	0.115099	0.158709	0.141207	0
4930544L04Rik	7;7	135396335;135396342	135399538;135399544	+;+	3210	0	0	0	0	0	0	0	0	0	0	0	0	0
4930544M13Rik	13;13;13;13;13;13;13;13;13;13;13	114607237;114607237;114608873;114608940;114611358;114611401;114656471;114682977;114689795;114697180;114697647	114607652;114607636;114609005;114609005;114611496;114611496;114656824;114683090;114689942;114697539;114697822	+;+;+;+;+;+;+;+;+;+;+	1840	0	0	0	0	0	0	0	0	0.0472281	0	0	0	0.0326627
4930545L23Rik	2;2;2;2;2;2	135169573;135185549;135186116;135191462;135212220;135215168	135171050;135185878;135186158;135191573;135212309;135215616	-;-;-;-;-;-	2502	1.29628	0.921726	0.808352	0.818634	0.792029	1.29937	1.68221	0.514448	0.382053	0.313065	0.485642	0.408082	1.41721
4930546C10Rik	18;18;18	68944633;68947350;68949998	68944705;68947495;68950141	-;-;-	363	0	0	0	0	0	0	0	0	0	0	0	0	0
4930547E08Rik	2;2;2;2	103804452;103805975;103806174;103810473	103804664;103806066;103806259;103810622	-;-;-;-	541	0.255106	0.101495	0	0.102324	0.0963935	0.445132	0.131861	0	0.321256	0	0.0935826	0.222034	0.222179
4930547M16Rik	10;10;10;10	39899329;39899359;39905733;39907006	39899529;39899529;39907931;39907483	+;+;+;+	2400	0.316279	0.892264	0.271841	0.184524	0.0869148	0.426446	0.148619	0.107262	0.217249	0.44876	0.295331	0.2002	0.0250414
4930548G14Rik	15;15;15;15;15	46623305;46625349;46625456;46626669;46639268	46623371;46625776;46625773;46626767;46639858	+;+;+;+;+	1185	0	0	0	0	0	0	0	0	0	0	0	0	0
4930548H24Rik	5;5;5	31485740;31485859;31487282	31488476;31486304;31488476	+;+;+	2737	0.151274	0.140431	0	0.18203	0.152426	0.0879855	0.0781917	0.30568	0.34925	0.321959	0.133553	0.153606	0.109791
4930548K13Rik	4;4;4	26635820;26671259;26705300	26636092;26671396;26705449	-;-;-	561	0	0	0	0	0	0	0	0	0	0	0	0	0
4930549C01Rik	4;4	136610437;136612795	136610687;136613226	+;+	683	0	0	0	0	0	0.0881466	0	0	0	0	0	0	0
4930550C14Rik	9;9;9;9;9;9;9;9;9;9;9;9;9;9;9;9;9;9;9;9;9;9;9;9;9	53402325;53403337;53403386;53405286;53405298;53408053;53411747;53414339;53414339;53414339;53421569;53421569;53421569;53422888;53422888;53422888;53425523;53425523;53425523;53428135;53428135;53428135;53432403;53432403;53432403	53402812;53403455;53403455;53405325;53405421;53408142;53411839;53414392;53414392;53414392;53421769;53421769;53421769;53423018;53423018;53423018;53425693;53425693;53425693;53428190;53428190;53428190;53432720;53432803;53434402	+;+;+;+;+;+;+;+;+;+;+;+;+;+;+;+;+;+;+;+;+;+;+;+;+	3539	0.506969	1.02401	0.755839	0.265915	0.221032	0.748511	0.624878	0.381889	0.122774	0.30433	0.300421	0.254564	0.16982
4930550C17Rik	13;13;13;13;13	56222224;56227258;56238078;56240810;56243782	56223110;56227366;56238225;56240917;56243940	-;-;-;-;-	1411	0	0	0	0	0	0	0	0	0	0	0	0	0
4930550L24Rik	X;X;X;X;X	58909360;58911409;58911461;58918834;58918834	58909419;58911561;58911561;58920304;58920304	+;+;+;+;+	1684	0	0	0	0	0	0	0	0.076434	0	0	0	0.0356651	0
4930551L18Rik	4;4;4	95089083;95090594;95091081	95089324;95090712;95091419	-;-;-	700	6.60489	6.19682	3.16889	1.89797	2.16045	5.07435	3.77067	4.2292	4.84156	4.75569	5.06282	3.26041	2.83326
4930551O13Rik	2;2	5037280;5040201	5037411;5041133	+;+	1065	2.52699	2.26852	2.26662	3.8984	4.06418	3.27872	2.41139	7.91626	15.544	14.4798	5.03905	6.31618	4.96596
4930552N02Rik	4;4;4;4	52814604;52815353;52825661;52827377	52814732;52815415;52825763;52828269	+;+;+;+	1188	0	0	0	0	0	0	0	0	0	0	0	0	0
4930552P12Rik	19;19;19;19	55640589;55643428;55698299;55702128	55642551;55643601;55698580;55702204	-;-;-;-	2496	0.193527	0.0879945	0.104554	0.133071	0.041786	0.0964809	0.057161	1.44392	1.00965	1.88291	0.628795	0.216563	0.192626
4930553I04Rik	5	128735360	128736029	-	670	0	0	0	0	0	0	0	0	0	0	0	0	0
4930553M12Rik	4	88867882	88868379	-	498	0	0	0	0	0	0	0	0	0	0	0	0	0
4930553P18Rik	6;6	86004380;86007860	86004542;86009355	+;+	1659	0.0831902	0.0661948	0.019663	0.0333679	0	0.0362894	0.0859999	0	0	0	0.0305173	0	0
4930554C24Rik	9;9;9;9;9;9;9;9;9;9;9;9;9;9;9;9;9;9;9	84774398;84774407;84774512;84776704;84776704;84776704;84779969;84779969;84782699;84782699;84782699;84783946;84785876;84792600;84792600;84825601;84851283;84857487;84857487	84774693;84774693;84774693;84776777;84776777;84776777;84780066;84780066;84782908;84782908;84782908;84784351;84785955;84792718;84792718;84826183;84852367;84857560;84857691	+;+;+;+;+;+;+;+;+;+;+;+;+;+;+;+;+;+;+	3156	0	0.0521945	0.0413446	0	0.0413093	0	0.0226036	0	0.0275348	0.0310238	0.0160419	0.0380609	0
4930554G22Rik	3	107874795	107875480	+	686	0	0	0	0	0	0	0	0	0.126676	0	0	0	0
4930554G24Rik	11;11;11;11	14072103;14076641;14147470;14178909	14073231;14076801;14147649;14179041	-;-;-;-	1603	0.731819	1.8497	1.3024	0.690672	1.52901	0.751143	1.33506	0.441629	0.0542107	0.48864	1.137	0.636944	0.899803
4930554H23Rik	7;7;7;7;7;7;7;7;7;7	63344690;63347896;63350039;63407450;63409947;63427178;63428644;63433119;63443180;63443563	63345059;63348069;63350093;63407625;63410092;63427296;63428864;63433222;63443389;63444529	-;-;-;-;-;-;-;-;-;-	2542	0	0	0	0	0	0	0	0	0	0	0	0	0
4930555A03Rik	3;3;3;3;3;3;3;3	151294126;151294162;151294163;151294873;151294878;151295003;151295885;151295885	151294289;151294289;151294289;151295591;151296305;151295139;151296303;151296641	+;+;+;+;+;+;+;+	1933	0.678282	0.596523	0.303764	0.0572761	0.29676	0.498327	0.627381	0.0998821	0.134868	0	0.235723	0.155355	0.124365
4930555B11Rik	2;2;2;2	57181831;57185848;57186478;57187141	57181925;57186010;57186635;57188257	+;+;+;+	1533	0	0	0	0	0	0	0	0	0	0	0	0	0
4930555B12Rik	X;X	114926989;114928386	114927056;114928600	+;+	283	0	0	0	0	0	0	0	0	0	0	0	0	0
4930555F03Rik	8;8;8;8;8;8;8;8;8;8;8;8;8;8;8;8;8;8;8;8;8;8;8;8;8;8;8;8	49370886;49370886;49370913;49371100;49371100;49371100;49371975;49371975;49371975;49377029;49377029;49388957;49443626;49463235;49463323;49485481;49495293;49495293;49495293;49500430;49500430;49500430;49500430;49501859;49501859;49517721;49532700;49548921	49371002;49371002;49371002;49371129;49371129;49371129;49372015;49372015;49372015;49377352;49377364;49389069;49443751;49463401;49463401;49485632;49495495;49495495;49495430;49500506;49500489;49500489;49500506;49501984;49501891;49521095;49532916;49548994	+;+;+;+;+;+;+;+;+;+;+;+;+;+;+;+;+;+;+;+;+;+;+;+;+;+;+;+	5154	0.0133889	0	0	0	0	0	0	0	0	0	0	0	0
4930555G01Rik	14;14;14;14;14	5050629;5051573;5052696;5053501;5057870	5050840;5051735;5052827;5053684;5059243	+;+;+;+;+	2065	0	0	0	0	0	0	0	0	0	0	0	0	0
4930555K19Rik	15	41173701	41173871	+	171	0	0	0.381531	0	0	0	0	0	0	0	0	0	0
4930555M17Rik	3;3	5512995;5515157	5513219;5515333	-;-	402	0	0	0	0	0	0	0	0	0	0	0	0	0
4930555O08Rik	11;11	32789762;32790471	32790174;32790725	-;-	668	0	0	0	0	0	0	0	0.0963434	0	0.146574	0	0	0
4930556G01Rik	4;4;4;4;4;4;4	30664596;30671930;30698348;30701754;30704479;30795615;30796545	30664804;30672049;30698500;30701855;30704606;30795674;30796663	+;+;+;+;+;+;+	891	0	0	0	0	0	0	0	0	0	0	0	0	0
4930556G22Rik	1;1	71983681;72038384	71984073;72038731	-;-	741	0	0	0	0	0	0	0	0	0.234547	0	0	0	0
4930556I23Rik	1;1	37614259;37614899	37614344;37615372	+;+	560	2.34128	2.25517	1.16503	0.790819	0.838107	2.04264	0.764324	0.919391	0.465534	0.524524	0.72326	1.60875	0.429281
4930556J24Rik	11;11	3937541;3976194	3938175;3976778	-;-	1220	3.73313	4.32067	3.79686	5.44499	5.01356	3.89846	3.82997	4.90593	6.26818	5.5376	5.06282	4.45528	3.49759
4930556L07Rik	2;2	151747578;151749738	151748826;151749978	-;-	1490	0	0	0	0	0	0	0	0	0	0	0	0	0
4930556M19Rik	15;15;15;15;15;15;15;15;15	10714836;10716648;10717144;10720729;10767435;10768108;10769023;10788326;10788615	10714980;10716774;10719429;10722471;10767558;10768201;10769314;10788502;10790123	+;+;+;+;+;+;+;+;+	6497	4.64149	3.79467	4.19749	1.22694	1.10767	3.75291	3.71123	2.22878	1.67192	1.73308	2.14295	1.54379	1.51705
4930556N13Rik	11;11;11;11;11	88851604;88852202;88859278;88879712;88881155	88851836;88852283;88859645;88879821;88881395	+;+;+;+;+	1034	0.667372	0.849649	0.504773	0.267685	0.151302	0.407571	0.482939	0.560171	0.504254	0.473459	0.538598	0.755108	0.232493
4930557B06Rik	5	113142449	113142829	+	381	0.905594	1.15294	0.684954	0.435885	1.23186	1.58016	1.31065	0.506751	0.228083	0.256985	0.132882	0.157638	0.946447
4930557F10Rik	13;13	23276204;23312976	23276408;23313400	-;-	630	0	0	0	0	0	0	0	0	0	0.155415	0	0	0
4930557J02Rik	5;5;5;5	34118740;34119207;34134300;34135189	34119121;34119635;34134412;34135339	+;+;+;+	1075	0.192576	0.204311	0.0606901	0.154486	0.0970211	0.112008	0.0663599	0.718408	0.323348	0.637561	0.329672	0.11174	0
4930558C23Rik	3;3	95386461;95402706	95387055;95402841	-;-	731	0	0.0751143	0	0	0	0	0	0	0.118878	0	0.138518	0	0
4930558F17Rik	5;5;5;5;5	11109800;11114974;11118216;11122075;11126340	11110072;11115104;11118435;11122120;11126455	-;-;-;-;-	786	0	0	0	0	0	0	0	0	0	0	0	0	0
4930558G05Rik	X;X;X	129064297;129066292;129066883	129064417;129066400;129067146	+;+;+	494	0	0	0	0	0	0	0	0	0	0	0	0	0
4930558J18Rik	1;1;1;1	57359222;57362566;57375248;57377405	57360663;57362763;57375519;57377544	-;-;-;-	2052	0.0336288	0.107034	0	0.0809318	0.152482	0.0293392	0.104294	0	0	0	0.0740178	0.0292691	0.0292882
4930558J22Rik	13;13	23756203;23757555	23757235;23757620	-;-	1099	4.04494	5.39992	8.28138	10.2252	10.2295	6.98236	8.37349	2.59128	1.4565	0.779548	4.14239	3.87303	4.12438
4930558K02Rik	1;1;1;1;1;1;1;1;1;1;1;1;1;1	161942086;161942091;161949584;161949584;161952600;161952600;161957093;161957093;161964822;161964822;161967911;161967911;161968965;161979486	161942535;161942535;161949642;161949642;161952667;161952667;161957176;161957176;161964906;161964906;161967996;161967996;161969148;161979636	-;-;-;-;-;-;-;-;-;-;-;-;-;-	1167	0.0591313	0.188204	0.167717	0.189742	0.134059	0.0515888	0	0.0551477	0.148928	0	0	0.154396	0
4930558N11Rik	7;7;7;7;7;7;7;7	39790967;39795200;39795403;39797154;39797532;39797532;39797532;39797532	39791950;39795504;39795504;39797354;39797727;39797742;39797727;39797727	-;-;-;-;-;-;-;-	1701	0	0	0	0	0	0	0	0	0	0	0	0	0
4930560O18Rik	7	120101611	120103205	-	1595	2.59585	2.25487	2.69966	1.66593	1.3732	1.77404	1.87846	2.46132	1.36206	0.920795	1.61883	1.12966	1.14924
4930562A09Rik	5;5	116390678;116392268	116390878;116392800	-;-	734	0	0	0	0	0	0	0	0	0.118392	0	0	0	0
4930562C15Rik	16;16;16;16;16;16;16;16;16;16;16;16;16;16;16;16;16;16;16;16;16;16;16;16;16;16;16;16;16;16;16;16;16;16;16;16;16;16;16;16;16;16;16;16;16;16;16;16;16;16;16;16;16;16;16;16;16;16;16;16;16;16;16;16;16;16;16	4835416;4835416;4841107;4847426;4847426;4847426;4849018;4849018;4849018;4849271;4849271;4849271;4849440;4849440;4849440;4850735;4851472;4851472;4851472;4851472;4851859;4851859;4851859;4851859;4853918;4853918;4854829;4854829;4858254;4858254;4858254;4860964;4860964;4860964;4860964;4860964;4861523;4861523;4861523;4861523;4861573;4863103;4863103;4863103;4863103;4863103;4864220;4864220;4864220;4864220…	4836008;4836008;4841499;4847530;4847530;4847530;4849098;4849098;4849098;4849357;4849357;4849357;4850946;4850946;4850946;4850946;4851557;4851557;4851557;4851557;4852129;4851969;4852123;4851969;4853992;4853992;4854993;4854993;4858592;4858603;4858592;4861082;4861082;4861082;4861062;4861082;4861585;4861585;4861585;4861585;4861585;4863195;4863195;4863195;4863195;4863195;4864391;4864391;4864391;4864391…	+;+;+;+;+;+;+;+;+;+;+;+;+;+;+;+;+;+;+;+;+;+;+;+;+;+;+;+;+;+;+;+;+;+;+;+;+;+;+;+;+;+;+;+;+;+;+;+;+;+;+;+;+;+;+;+;+;+;+;+;+;+;+;+;+;+;+	5317	6.66442	10.5284	3.71794	4.02223	2.01063	6.70318	2.69677	1.64615	7.02781	8.08408	5.5989	3.85189	1.33378
4930562D21Rik	9;9	79688776;79689232	79688849;79690907	+;+	1750	0.118296	0.094129	0.0745621	0.0948983	0	0.103207	0.0815279	0.147103	0.099314	0.167848	0.0289304	0.1716	0.309082
4930562F07Rik	1;1;1;1;1;1;1;1;1	160074735;160074735;160074970;160077383;160077383;160077383;160077790;160077790;160077929	160075327;160075327;160075327;160077490;160077477;160077490;160077942;160077918;160077985	-;-;-;-;-;-;-;-;-	897	26.2332	21.3023	21.1654	14.5028	14.5342	19.2626	21.4727	42.5462	32.4542	24.4505	27.8822	18.547	10.3181
4930562F17Rik	1;1;1;1;1	159134272;159135327;159149089;159165720;159166070	159134497;159135504;159149163;159165882;159166387	+;+;+;+;+	960	0	0	0	0	0	0.0627126	0	0	0	0	0	0	0
4930563D23Rik	16	92318763	92321408	-	2646	0.0521589	0.103758	0.0493136	0.0209211	0.0985428	0.182023	0	0.048645	0.0656839	0.11101	0.0191338	0.0907938	0
4930563E18Rik	18;18;18	10706860;10710512;10711680	10708204;10710566;10711832	+;+;+	1553	0.177737	0.141426	0.252061	0	0.235056	0.155065	0.0459349	0	0	0	0	0	0.0386989
4930563E22Rik	11;11;11	72215138;72215172;72217848	72218450;72216001;72218444	+;+;+	3313	0.291605	0.331473	0.216619	0.150382	0.299073	0.345269	0.172259	0.0777029	0.236069	0.118215	0.168098	0.145029	0.199545
4930563F08Rik	5;5;5	131880269;131881069;131883324	131880309;131881097;131883768	+;+;+	515	1.60791	0.639711	1.14015	0.75243	0.911339	1.16901	1.38518	0.749795	0.337475	0	1.08138	0.233243	0.116698
4930563H07Rik	6;6;6	48986616;48991559;48999307	48986828;48991663;48999616	-;-;-	628	0	0	0	0	0	0	0	0	0	0	0	0	0
4930563I02Rik	14;14;14;14;14	60087071;60087517;60088060;60095881;60095944	60087174;60088274;60088274;60096093;60096083	+;+;+;+;+	1075	0	0	0	0	0	0	0	0.0598673	0	0	0	0	0
4930563M21Rik	9;9;9;9;9;9;9;9;9;9;9;9;9;9;9;9;9;9;9;9;9;9;9;9;9;9;9;9;9;9;9;9;9	55962589;55962589;55973690;55973690;55973851;55973851;55973983;55973983;55975084;55975084;55977916;55977916;55978702;55978702;55980798;55980798;55982487;55983317;55987570;55987930;55989452;55990102;55991252;55993800;55994651;55999840;56002441;56002616;56002960;56003976;56007285;56009245;56010472	55962882;55962882;55973770;55973770;55973892;55973892;55974021;55974021;55975197;55975197;55977937;55977937;55978766;55978766;55980899;55980932;55982511;55983375;55987638;55988037;55989476;55990148;55991359;55993824;55994715;55999926;56002524;56002654;56003073;56004080;56007309;56009312;56010550	-;-;-;-;-;-;-;-;-;-;-;-;-;-;-;-;-;-;-;-;-;-;-;-;-;-;-;-;-;-;-;-;-	1924	0.466259	0.45662	0.203457	0.086316	0.325253	0.344202	0.185387	0.100349	0.180665	0.101779	0.210512	0.124865	0.156183
4930564D02Rik	3;3;3;3;3	105066844;105068307;105077632;105077777;105078299	105066885;105068376;105077678;105077846;105078806	+;+;+;+;+	737	0	0	0	0	0	0	0	0	0	0	0	0	0
4930565D16Rik	3;3;3;3	84349376;84378143;84378779;84379728	84350107;84378300;84378806;84379921	-;-;-;-	1112	0	0	0	0	0	0	0	0	0	0	0	0	0
4930565N06Rik	16;16;16	36880519;36886351;36896997	36882577;36886514;36897189	-;-;-	2416	2.31354	3.20451	2.75442	2.8641	1.5649	3.81259	3.27748	2.93018	4.02846	4.74156	3.43668	3.07012	4.3781
4930566F21Rik	5;5;5;5	31486629;31486633;31487633;31494874	31486732;31487861;31487948;31495179	-;-;-;-	1626	1.27318	1.38453	2.00621	0.953263	1.53945	1.36996	1.18456	1.18741	1.65676	1.62583	1.31459	1.21893	1.73719
4930566N20Rik	3	157207662	157208860	-	1199	0.115106	0.0457953	0.163241	0.0923392	0.0869873	0.451907	0.297485	0.0536759	0	0.0816607	0	0	0
4930567H17Rik	X;X	70393901;70393901	70394740;70394740	-;-	840	0	0.0326837	0	0	0	0	0	0	0	0	0	0	0
4930568A12Rik	1;1;1;1;1;1;1;1;1	34477167;34480156;34480598;34480982;34482713;34484788;34484788;34485505;34485745	34477596;34480256;34480759;34481113;34482763;34484913;34484913;34485611;34485933	-;-;-;-;-;-;-;-;-	1298	0.372145	0.423024	0.351844	0.618399	1.00441	0.324675	0.164877	0.24791	0.401694	0.0754324	0.351043	0.185085	0.60192
4930568D16Rik	2;2;2;2;2;2	35354218;35355508;35362320;35364754;35366199;35367630	35355036;35355645;35362367;35364789;35366284;35367729	-;-;-;-;-;-	1227	0	0	0	0	0	0	0	0	0	0	0	0	0
4930568G15Rik	1;1;1;1;1;1;1	165064024;165066617;165068030;165068030;165068458;165069386;165091886	165067156;165067156;165068092;165068114;165068708;165069484;165091928	-;-;-;-;-;-;-	3611	0	0	0	0	0	0	0	0	0	0	0	0	0
4930569F06Rik	5	116821454	116821886	+	433	0	0	0	0	0	0	0	0	0	0	0	0	0
4930570D08Rik	X;X	133898699;133901185	133898865;133901213	-;-	196	0	0	0	0	0	0	0	0	0	0	0	0	0
4930570G19Rik	3;3;3;3;3;3;3;3;3;3;3;3;3	156546753;156546761;156547598;156547598;156548415;156551035;156551136;156551855;156559827;156561476;156561476;156561476;156561476	156547088;156547088;156547832;156547832;156551237;156551237;156551237;156551943;156560248;156561746;156561687;156561582;156561675	-;-;-;-;-;-;-;-;-;-;-;-;-	4176	0.115671	0.197229	0.234346	0.0265121	0.0749265	0.158584	0.136661	0.0154113	0.0208093	0	0.0484944	0	0
4930570N18Rik	1;1	193203038;193226024	193203184;193226208	+;+	332	1.6628	2.15003	1.96512	0.500217	0.157075	3.17341	4.08253	1.26001	1.04698	1.76948	1.06746	0.542712	1.6292
4930571K23Rik	7;7	125368861;125369012	125371013;125371007	+;+	2153	0	0	0	0	0.0242215	0	0	0	0	0	0	0	0
4930571N24Rik	15;15;15;15;15	77427979;77428012;77429385;77429385;77461710	77428197;77428197;77429506;77429780;77461966	+;+;+;+;+	872	0	0	0	0	0	0.138083	0	0	0	0	0	0	0.206764
4930572K03Rik	5;5;5;5;5;5;5;5;5	127170560;127170565;127174118;127177622;127177622;127177958;127177958;127184100;127184100	127170609;127170609;127174291;127177777;127177777;127178256;127178256;127184356;127184342	+;+;+;+;+;+;+;+;+	936	0	0	0	0	0	0	0	0	0	0	0	0	0
4930572O03Rik	5;5;5;5;5	15652286;15653529;15654340;15655704;15656876	15652785;15653709;15654483;15655863;15657059	-;-;-;-;-	1169	0	0.00516676	0	0.198889	0.00624537	0.103001	0.0305119	0	0.0683899	0.0117259	0.104808	0.0513773	0.0169656
4930573C15Rik	5;5	146706622;146707072	146706973;146707496	+;+	777	0	0	0	0.071245	0.0671157	0	0.0918107	0.082828	0	0	0.0651585	0	0
4930573I07Rik	5;5;5;5;5;5	128516115;128516117;128516766;128516766;128517585;128517585	128516376;128516376;128516868;128516872;128517611;128517634	-;-;-;-;-;-	419	0	0	0	0	0	0	0	0	0	0	0	0	0
4930577H14Rik	4;4	91938854;91939797	91939487;91939952	-;-	790	0	0	0	0	0	0	0	0	0	0	0	0	0
4930577N17Rik	3	51276759	51278383	+	1625	3.69449	3.58173	3.69369	3.67913	3.62635	4.03831	3.46807	3.56441	5.72201	5.03113	3.02211	5.32225	5.88049
4930578C19Rik	X;X;X;X;X;X;X;X;X;X;X;X;X	18414881;18416742;18418324;18418427;18420348;18420348;18423544;18423544;18447578;18447578;18449299;18461024;18461024	18416093;18416789;18419246;18419246;18420636;18420636;18423717;18423717;18447842;18447842;18449511;18461371;18461397	-;-;-;-;-;-;-;-;-;-;-;-;-	3499	3.23436	2.68344	3.11386	1.01254	1.24448	3.81975	3.32321	0.165538	0.0496712	0.223861	0.882629	0.669432	0.635518
4930578G10Rik	4;4;4;4;4;4;4;4;4;4;4;4;4	42735545;42735545;42735867;42735867;42735912;42760976;42760976;42760976;42767135;42812308;42812308;42845889;42845889	42735603;42735603;42735952;42735952;42735952;42761103;42761103;42761103;42767287;42812540;42812540;42846248;42845996	+;+;+;+;+;+;+;+;+;+;+;+;+	1019	0.585097	1.38592	0.888032	0.402006	0.308083	0.364533	0.949992	3.05934	3.39753	4.51026	3.24636	0.953063	0.0117958
4930578I06Rik	14;14;14;14	63971122;63973121;63986085;63987700	63971464;63973536;63986277;63987780	-;-;-;-	1033	0	0.0531545	0	0	0	0.116562	0.207174	0.186904	0.168247	0.189567	0	0	0
4930578I07Rik	14	66937365	66938736	+	1372	0.201184	0.240125	0.285314	0.121044	0.266066	0.526566	0.207979	0.0938154	0.126676	0	0.110703	0.0437756	0.0438042
4930578M01Rik	15;15;15;15	98985965;98987757;98987977;98988740	98986086;98987830;98988145;98989281	+;+;+;+	907	1.06515	0.90808	0.863178	0.305167	0.344976	1.26117	0.943818	0.212869	0.38324	0.107951	0.223277	0	0.265047
4930579C12Rik	9;9;9;9;9;9;9;9;9;9;9;9;9;9;9;9;9;9;9;9;9;9;9;9;9;9;9;9;9;9;9;9;9;9;9;9;9	89113111;89125759;89126668;89126947;89127391;89128868;89129348;89131459;89131925;89134063;89137028;89138026;89138785;89150131;89152005;89152769;89152769;89157374;89157374;89162288;89162288;89162862;89162862;89165220;89165220;89168213;89168213;89168922;89168922;89171727;89171727;89174478;89174478;89175343;89175343;89177789;89177789	89113371;89125815;89126742;89126971;89127422;89128892;89129415;89131483;89131992;89134176;89137141;89138050;89138855;89152052;89152052;89152839;89152839;89157487;89157487;89162312;89162312;89162932;89162932;89165333;89165333;89168237;89168237;89168986;89168986;89171840;89171840;89174502;89174502;89175413;89175413;89177813;89177887	-;-;-;-;-;-;-;-;-;-;-;-;-;-;-;-;-;-;-;-;-;-;-;-;-;-;-;-;-;-;-;-;-;-;-;-;-	3676	0.0187721	0.00492922	0.0931773	0.266095	0.199743	0.050443	0.0355132	2.47958	3.57835	2.58895	0.878556	0.876067	0.412815
4930579D09Rik	6;6	143533965;143535434	143534358;143535508	-;-	469	0	0.117076	0	0	0	0.128367	0	0	0	0	0	0	0
4930579F01Rik	3;3;3;3;3;3;3;3;3;3;3;3;3;3;3;3;3;3;3	138164078;138164135;138165817;138165817;138173522;138173522;138174712;138174712;138176458;138176458;138179498;138179498;138183584;138183584;138183733;138186144;138186261;138188389;138193595	138164535;138164535;138165860;138165860;138173723;138173723;138174793;138174793;138176601;138176601;138179562;138179562;138183790;138183790;138183790;138186673;138186713;138188478;138193825	-;-;-;-;-;-;-;-;-;-;-;-;-;-;-;-;-;-;-	2093	0	0	0	0	0	0	0	0	0	0	0	0	0
4930579G18Rik	14;14;14;14;14;14	54650511;54651065;54651740;54653374;54653831;54654153	54650548;54651268;54651814;54653453;54653946;54654607	+;+;+;+;+;+	968	17.1803	20.7609	18.6694	18.376	17.4548	25.5619	18.5712	13.2637	13.9596	14.6665	16.4751	18.6757	22.4752
4930579G24Rik	3;3	79629079;79631129	79629356;79632820	+;+	1970	0.2452	0.501703	0.662354	0.899206	0.661788	1.03906	1.26741	0.26135	0.264669	0.0497011	0.385494	0.335361	0.640653
4930579H20Rik	10;10;10;10;10	27389866;27392066;27392858;27394087;27396071	27389935;27392133;27392993;27394173;27397225	+;+;+;+;+	1516	0.546224	0.362194	0.688568	0.292123	0.171995	0.635399	0.752896	0.0424521	0.0573217	0.0645852	0.133584	0.15847	0
4930579K19Rik	9;9;9;9	98562229;98562460;98562960;98563082	98562349;98563611;98563611;98563592	-;-;-;-	1273	0.487868	0.646998	0.358753	0.3044	0.286757	0.425638	0.0560384	0.404445	0.273055	0.384569	0.755644	0.28308	0.755373
4930579M01Rik	8;8;8;8	47026805;47027619;47030153;47037870	47027191;47027721;47030287;47038177	-;-;-;-	933	0	0.117703	0	0	0.0558937	0.0645274	0.152919	0.137958	0	0	0	0	0
4930579O11Rik	8;8;8;8	81665876;81665904;81667007;81667066	81666481;81666481;81667072;81667118	-;-;-;-	718	0.096109	0.152949	0.0908661	0	0	0.419249	0.496775	0	0	0	0	0.0836492	0.167408
4930580E04Rik	5;5	23387109;23388079	23387275;23388601	+;+	690	1.40013	1.75071	0.756427	1.52433	1.13367	1.13428	0.620321	0	0.503767	0	0.220122	0.522262	0.261302
4930581F22Rik	9;9;9;9;9;9;9;9;9;9;9;9;9;9;9;9;9;9;9;9;9	35116728;35116754;35116767;35117369;35117369;35117414;35117565;35117981;35118065;35118195;35118199;35118199;35123601;35123601;35123601;35123601;35126212;35126216;35128779;35128955;35129832	35116840;35120310;35116840;35117432;35118346;35117856;35117856;35118346;35118346;35118346;35118269;35118346;35123694;35123640;35124068;35123694;35126390;35126897;35128837;35129021;35130922	+;+;+;+;+;+;+;+;+;+;+;+;+;+;+;+;+;+;+;+;+	5954	2.79317	3.49519	3.32017	2.68698	3.40711	4.07495	2.68981	3.46972	6.10079	4.66205	4.91911	7.54534	4.87538
4930583I09Rik	17;17;17;17	64832523;64834272;64834426;64835938	64832756;64834344;64834614;64836071	-;-;-;-	630	0	0	0	0	0	0	0	0.102155	0	0	0	0	0
4930583K01Rik	7;7	118243865;118244728	118243965;118245551	+;+	925	0.0746014	0.296803	0	0	0	0	0	0.0695756	0.0939457	0	0	0	0
4930583P06Rik	2;2;2	124217679;124219468;124222033	124218014;124219538;124222331	-;-;-	706	0.39097	0.622193	1.01652	0.313639	0.221596	0.426375	0.404175	0.0911578	0.123087	0.277369	0.215134	0	0
4930584F24Rik	5;5;5;5;5;5;5;5;5;5;5;5;5;5;5;5;5	26460070;26460072;26460074;26468400;26474927;26479719;26479719;26479719;26479719;26483290;26490381;26490381;26490585;26493242;26493242;26493242;26493242	26460370;26460370;26460370;26468563;26475327;26479867;26480089;26480089;26480089;26483425;26490659;26490659;26490659;26493289;26493314;26493278;26493289	-;-;-;-;-;-;-;-;-;-;-;-;-;-;-;-;-	1725	0	0	0	0	0	0	0	0	0	0	0	0	0
4930586N03Rik	13;13;13;13	23313525;23314179;23355789;23385643	23314025;23314315;23355874;23385799	+;+;+;+	881	2.5848	2.80464	3.03623	2.82756	2.54529	2.73344	3.07696	1.16881	1.28229	1.88932	2.35613	2.72691	2.93334
4930587A21Rik	1;1	61616943;61620612	61617255;61621149	-;-	851	0.0810884	0.0645224	0.0766649	0	0.306398	0	0	0	0.102115	0.0575272	0.297463	0	0.141244
4930588G17Rik	7;7;7;7	120670296;120671325;120674695;120675606	120670735;120671513;120675242;120675902	+;+;+;+	1474	0.74905	1.08029	0.973759	0.676006	0.707583	1.06194	0.725952	0.392956	0.412685	0.431766	0.772818	0.631568	0.733913
4930588K23Rik	16;16	18591992;18607831	18592033;18609751	+;+	1963	0.10546	0.251746	0.0332358	0.0282004	0	0.0306694	0.0726815	0	0	0	0.0257912	0	0
4930589L23Rik	3;3	79568192;79572224	79569198;79572580	+;+	1364	0	0.0402555	0.0478313	0.202923	0.152929	0.176552	0.0522998	0.0471828	0.382257	0.143565	0.111352	0.264194	0.352489
4930589O11Rik	5	65493096	65494015	+	920	0.675061	0.835565	0.56732	0.240684	0.623519	0.85071	0.775401	0	0	0	0.88049	0.652827	0.522603
4930589P08Rik	4;4	151376470;151378587	151376557;151379582	+;+	1084	0.190977	0.101307	0.120372	0.0510677	0.0962156	0.166617	0.131618	1.66237	1.12232	0.541944	0.887394	0.166218	0.110884
4930590H14Rik	9	77357352	77357902	+	551	0	0	0	0	0	0	0	0	0	0	0	0	0
4930590J08Rik	6;6;6;6;6;6;6;6;6;6;6;6;6;6;6;6;6;6;6;6;6;6;6;6;6;6;6;6;6;6;6;6;6;6;6;6;6;6;6;6;6	91902809;91904233;91906401;91914163;91914568;91914759;91916251;91916251;91917023;91917023;91917708;91917708;91918071;91918071;91919051;91919051;91923015;91923015;91923450;91923450;91928669;91928669;91933083;91933083;91934448;91934448;91942281;91942281;91944164;91944164;91944264;91945365;91945365;91945365;91949288;91949288;91949931;91949931;91949931;91950544;91950544	91904712;91904356;91906537;91914218;91915236;91915236;91916391;91916391;91917139;91917139;91917716;91917716;91918203;91918203;91919320;91919320;91923164;91923164;91923570;91923570;91928800;91928800;91933206;91933206;91934691;91934691;91942584;91942584;91944271;91944271;91944271;91945507;91945507;91945507;91949383;91949383;91950030;91950065;91950065;91950640;91950725	+;+;+;+;+;+;+;+;+;+;+;+;+;+;+;+;+;+;+;+;+;+;+;+;+;+;+;+;+;+;+;+;+;+;+;+;+;+;+;+;+	5175	0.493378	0.551738	0.302571	0.310215	0.393006	0.698019	0.606536	0.609374	0.822819	0.643282	0.635909	0.429415	0.243881
4930590L14Rik	3;3	140951876;140952449	140951912;140953247	+;+	836	0	0	0	0	0	0	0	0	0	0	0	0	0
4930590L20Rik	1;1;1;1	140570176;140594928;140621394;140656328	140570531;140594974;140621466;140656404	-;-;-;-	553	0	0	0	0.100104	0	0	0.129	0	0	0	0	0.108608	0
4930591A17Rik	2;2;2	179414936;179415760;179416472	179415100;179415920;179416882	+;+;+	737	0	0	0	0.225335	0	0	0	0	0	0	0	0	0
4930593A02Rik	3;3;3;3;3;3;3;3;3;3;3;3;3;3;3	58692589;58696054;58732830;58732830;58737821;58738367;58740247;58750373;58750373;58750956;58752103;58788431;58788431;58788663;58796710	58692621;58696126;58732953;58732953;58737825;58738515;58740345;58750497;58750497;58751179;58752338;58788545;58788524;58788889;58797331	+;+;+;+;+;+;+;+;+;+;+;+;+;+;+	2032	0.0679196	0.162132	0.0321072	0.0272428	0.0769914	0.22221	0.140427	0.0950158	0	0	0	0.0591143	0
4930593C16Rik	9;9;9;9;9;9	120924452;120924532;120928352;120930370;120930370;120930760	120924696;120924696;120928502;120930667;120930767;120930804	-;-;-;-;-;-	831	0	0.0660753	0	0	0	0	0	0	0	0	0	0	0
4930594C11Rik	1	37485851	37488605	-	2755	0.876668	0.896873	0.876206	2.21028	1.83609	1.49691	0.945117	1.67026	2.38146	2.5233	1.54365	1.76583	3.46482
4930594M17Rik	18;18	81226204;81235826	81226995;81236066	-;-	1033	0	0	0	0	0	0	0	0	0	0	0	0	0
4930594M22Rik	14;14;14;14;14;14;14;14	122913030;122913067;122913075;122923622;122926130;122926130;122932398;122936837	122913292;122913292;122913292;122923677;122929442;122927690;122932474;122937469	+;+;+;+;+;+;+;+	4342	1.03303	0.89786	0.736262	0.650213	0.564486	0.790335	0.837905	0.592882	0.260179	0.360797	0.583005	0.52563	0.650546
4930594O21Rik	3;3;3;3;3;3	37613913;37613923;37614124;37614124;37614375;37614782	37613989;37613989;37614233;37614233;37614826;37615276	+;+;+;+;+;+	1089	0	0	0	0	0	0	0	0	0	0	0	0	0
4930595D18Rik	12;12;12;12	111159850;111161759;111174909;111184403	111160379;111161859;111175006;111184491	-;-;-;-	818	1.51848	1.67813	1.19637	3.113	2.67757	1.91358	1.65697	4.09118	9.34863	6.22419	3.83734	3.89142	3.89397
4930595M18Rik	X;X;X;X	81419575;81422574;81425890;81457378	81421102;81422750;81426084;81458121	-;-;-;-	2644	0	0	0	0	0	0	0	0	0	0	0	0	0
4930595O18Rik	6	100922550	100923156	-	607	0	0	0	0	0	0	0	0	0	0	0	0	0
4930596D02Rik	14;14;14	35809488;35811463;35811798	35810269;35811659;35811978	-;-;-	1160	0	0	0	0	0	0	0	0	0	0	0	0	0
4930596I21Rik	1;1;1	138977656;138978092;138979162	138977882;138978240;138979246	+;+;+	461	2.5447	2.85858	4.10415	4.08275	3.733	5.28908	4.48757	4.60693	7.72861	7.32741	3.34959	5.60213	7.82204
4930597A21Rik	11;11;11;11	44586317;44587302;44589834;44590976	44586350;44587477;44590067;44591229	+;+;+;+	698	0	0	0	0	0	0	0	0.0922026	0.248996	0	0	0.086046	0
4930597L12Rik	3	153473744	153474654	-	911	0.68173	0.904093	0.644541	0.303827	0.515192	0.9252	0.939674	0.282579	0.476947	0.64486	0.77804	0.659277	0.923591
4930597O21Rik	6;6;6	66894652;66894654;66896045	66895456;66895160;66896521	-;-;-	1282	1.02271	1.67039	1.52672	1.38177	1.54575	1.64364	1.1129	2.05823	1.28791	1.22198	3.25805	2.76408	3.84411
4930598A11Rik	4;4;4	20032846;20038324;20041228	20033019;20038440;20041564	-;-;-	628	0.43953	0.262302	0.207777	0.264446	0.0830396	0.766931	0	0.20496	0.691877	0.311819	0.483709	0.191274	0.382798
4930598F16Rik	1;1;1;1	95701184;95712602;95715987;95716237	95701496;95712704;95716049;95716518	-;-;-;-	761	0	0	0	0	0	0.158224	0	0	0	0	0	0	0
4930598N05Rik	10;10;10;10;10;10;10;10;10;10;10;10;10;10;10;10;10;10;10;10;10;10;10;10	10184800;10234971;10234991;10234994;10234994;10235001;10235325;10235325;10235384;10235384;10235461;10254153;10254153;10254153;10254153;10254153;10254153;10254153;10257486;10257486;10257486;10257888;10258566;10258566	10184845;10235040;10235040;10235506;10235040;10235040;10235506;10235506;10235506;10235506;10235506;10255476;10254218;10254576;10254218;10254218;10254189;10254575;10257645;10257645;10257645;10258038;10258699;10258699	+;+;+;+;+;+;+;+;+;+;+;+;+;+;+;+;+;+;+;+;+;+;+;+	2351	0	0	0.0277507	0	0.0221816	0.0256079	0	0	0	0	0.0215347	0	0.0255633
4930599A14Rik	1;1;1;1	126872203;126874745;126876377;126876377	126872376;126874858;126876589;126876615	-;-;-;-	527	0	0	0	0	0	0	0	0	0	0	0	0	0
4930599N23Rik	6;6;6;6	39118473;39140160;39146878;39148068	39118820;39140272;39147051;39148312	+;+;+;+	880	9.95886	10.9193	12.6406	20.5074	18.9632	15.5299	11.9165	18.2102	21.7249	18.5809	17.8925	24.297	28.3765
4930599N24Rik	3	136758958	136759960	-	1003	5.36639	4.65327	3.83776	5.57437	4.00345	6.60264	5.68988	3.14408	4.85183	3.51426	4.13909	3.77247	5.27292
4931400O07Rik	X;X	62467991;62468472	62468296;62468812	+;+	647	0	0	0	0	0	0	0	0	0	0	0	0	0
4931403E22Rik	19;19;19;19	26768801;26775038;26775920;26823848	26769103;26775155;26776106;26823907	-;-;-;-	668	9.50386	11.5078	12.1108	4.14351	4.5279	10.9954	13.1354	2.50493	1.30089	2.19861	4.54744	4.49552	5.57808
4931403G20Rik	12;12	69847635;69852111	69847772;69853671	+;+	1699	3.89912	3.58732	2.41921	2.11785	2.42481	3.40176	3.7369	2.53793	2.91541	3.28484	2.71169	2.33312	2.19315
4931403M11Rik	14;14	24617568;24620734	24617593;24621693	+;+	986	0	0	0	0	0.0264447	0	0	0	0	0	0	0	0
4931406B18Rik	7;7;7;7;7;7;7;7;7;7;7;7;7;7;7;7;7;7;7;7;7;7;7;7;7;7;7;7;7;7;7;7;7;7;7;7;7;7;7;7;7;7;7;7;7;7;7;7;7;7	43492044;43493852;43494598;43494598;43495309;43495309;43495601;43495601;43496664;43497747;43497809;43497809;43497809;43497809;43497809;43498051;43498051;43498051;43498051;43498051;43498051;43498395;43499173;43499173;43499173;43499173;43499173;43499947;43501016;43501016;43501016;43501016;43501016;43501016;43501239;43504183;43504183;43504183;43504183;43504183;43504183;43504183;43504183;43505291;435…	43494171;43494171;43495040;43495040;43495734;43495734;43495734;43495734;43496673;43497911;43497911;43497911;43497911;43497911;43497911;43498332;43498332;43498332;43498332;43498332;43498332;43499454;43499454;43499454;43499454;43499454;43499454;43500022;43501306;43501306;43501306;43501306;43501306;43501306;43501306;43504284;43504284;43504284;43504284;43504222;43504284;43504284;43504284;43505933;435…	-;-;-;-;-;-;-;-;-;-;-;-;-;-;-;-;-;-;-;-;-;-;-;-;-;-;-;-;-;-;-;-;-;-;-;-;-;-;-;-;-;-;-;-;-;-;-;-;-;-	5633	0.0245007	0.00974766	0	0.0982733	0.129608	0.0106878	0	0.308477	0.941041	0.269417	0.368499	0.810326	0.50145
[truncated: 47,990 more rows]
