# Supplementary material for: Vaccination induces rapid protection against bacterial pneumonia via training alveolar macrophage in mice
Source: eLife. 2021 Sep 20;10:e69951. doi: 10.7554/eLife.69951 (PMC8455131; doi:10.7554/eLife.69951)
Supplement: Figure 5—source data 1. [file elife-69951-fig5-data1.xlsx]

## Sheet: Figure 5C
TNF
control	IWC
0.36841	0.603221
0.345259	0.480854
0.33203	0.576763

## Sheet: Figure5D
TNF
control	IWC
0.3778	0.956065
0.56041	1.45317
0.76331	1.45317

## Sheet: Figure 5E
	Bacterial burdens in lung				Clinical score
	control	IWC			control	IWC
	112000000	8400000			2	1
	21800000	1200000			2	1
	1660000000	2600000			2	1
	2070000000	600000			3	1
	107000000	1200000			3	1
		28600000				1
		4000000				2
		4000000				2
		30000000				3

## Sheet: Figure 5F
	survival data
	Died：1
	Live：0
		IWC	IWC+anti-TNFa
	7	0	0
	7	0	0
	7	0
	7	0
	7	0
	2		1
	2		1
	2		1
