# Supplementary material for: Vaccination induces rapid protection against bacterial pneumonia via training alveolar macrophage in mice
Source: eLife. 2021 Sep 20;10:e69951. doi: 10.7554/eLife.69951 (PMC8455131; doi:10.7554/eLife.69951)
Supplement: Figure 6—source data 1. [file elife-69951-fig6-data1.xlsx]

## Sheet: Figure 6A
Geneid	IWC-7d-1	IWC-7d-2	Control-1	Control-2	Control-3
Aif1	188	103	43.5	66	81
Cd244	642	335	210	279	215
Cd300a	871.5	316	78.5	178	210.5
Cx3cr1	436.5	205	67	151	145
Cxcr2	131	161.5	32	91.5	51
Klrk1	583	362.5	140	280.5	285.5
Lat2	393.5	173	105	152.5	152.5
Pilrb1	134.5	64.5	23	47	43.17
Pirb	1196.43	579.35	380.46	491.5	426.39
Ptafr	408	168	64	112	125
Rasgrp1	270	154	53	87	108
Slc11a1	470	142	53	101	91
Stap1	218	115	46	78	78
Tlr1	160	46	25.5	36	38
Tlr6	109.5	54.5	25.5	54.5	34
Tlr7	770	351	271	271	264
Tlr9	184	113	45	82	80
Tlr4	9.969	9.21666	6.79381	7.22429	7.83231

## Sheet: Figure 6B
Tlr4 RPKM
control	IWC-2d	IWC-7d
6.79381	13.4009	9.969
7.22429	8.99652	9.21666
7.83231	10.6279

## Sheet: Figure 6C
	TLR4 expression on BALF AMs
	control	IWC２ｄ	IWC７ｄ
	76.8	160	99.7
	82.7	174	108
	78	158	106

## Sheet: Figure 6D
	TLR4 in vitro on AMs
	Control	IWC
	19.5	26.1
	21.4	40.5
	21.3	42.4

## Sheet: Figure 6E
	Survival curve data
		WT		Tlr4-/- mice
	Day	IWC	Control	IWC	Control
	7	0
	7	0
	7	0
	7	0
	7	0
	2		1
	2		1
	2		1
	2		1
	2		1
	2			1	1
	2			1	1
	2			1	1
	2			1	1
	2			1	1
	2			1	1
	2			1	1
	2				1
	2				1
	2				1
	7			0
	7			0
	7			0

## Sheet: Figure 6F
	Lung bacterial burdens						Blood bacterial burdens
	WT mice		Tlr4-/- mice				WT mice		Tlr4-/- mice
	control	IWC	control	IWC			control	IWC	control	IWC
	2400000000	4000000	85600000	172000000			9800000	160	3720000	1660000
	680000000	2200000	146000000	62000000			3400000	320	2180000	2380000
	800000000	1800000	770000000	116000000			2200000	400	1940000	5400000
	382000000	7600000	214000000	92200000			6400000	280	13300000	8600000
	168000000	1600000		386000000			13000000

## Sheet: Figure 6G
	TNF concentration：pg/ml
	WT mice		Tlr4-/- mice
	control	IWC	control	IWC
	2576.47	4629.41	776.471	941.177
	2770.59	3317.65	747.059	888.235
	2235.29	3741.18	694.118	1105.88
	2570.59	3600	541.177	894.118

## Sheet: Figure 6H
	Neutrophil number
	WT mice		Tlr4-/- mice
	control	IWC	control	IWC
	42.7594	44.5414	5.2452	1.4538
	37.2422	68.89	7.8418	4.8028
	32.0108	81	5.5862	3.3314
	26.146	49.397	5.1488	2.7066

## Sheet: Figure 6I
TNF concentration ng/ml
WT mice		Tlr4-/- mice
control	IWC	control	IWC
0.0746633	0.476513	0.0152938	0.0466355
0.0854702	0.67775	0.0105716	0.0490929
0.0658	0.3546	0.01334	0.028
