# Supplementary material for: Vaccination induces rapid protection against bacterial pneumonia via training alveolar macrophage in mice
Source: eLife. 2021 Sep 20;10:e69951. doi: 10.7554/eLife.69951 (PMC8455131; doi:10.7554/eLife.69951)
Supplement: Figure 7—source data 1. [file elife-69951-fig7-data1.xlsx]

## Sheet: Sheet1
survival data: died:1;live:0
	A: IWC(P.a) to P.a challenge					B: IWC(K.p) to K.p challenge					C: IWC(S.a) to S.a challenge					D: IWC(S.p) to S.p challenge
	day	Control	IWC(P. a)			day	Control	IWC(K. p)			day	Control	IWC(S. a)			day	Control	IWC （S.p)
	1	1				2	1				1		1			2	1
	1	1				2	1				1		1			6	1
	2	1				2	1				1		1			7	1
	2	1				2	1				1		1			7	1
	2	1				3	1				2		1			8	0
	7		0			5		1			2		1			6		1
	7		0			7		0			2		1			7		1
	7		0			7		0			2		1			7		1
	7		0			7		0			7		0			8		0
	7		0			7		0			7		0			8		0
											1	1
											1	1
											1	1
											1	1
											1	1
											1	1
											1	1
											1	1
											1	1
											1	1
