# Supplementary material for: Vaccination induces rapid protection against bacterial pneumonia via training alveolar macrophage in mice
Source: eLife. 2021 Sep 20;10:e69951. doi: 10.7554/eLife.69951 (PMC8455131; doi:10.7554/eLife.69951)
Supplement: Figure 8—source data 1. [file elife-69951-fig8-data1.xlsx]

## Sheet: Sheet1
survival data: died:1;live:0
	A: IWC(A.b) to P.a challenge					B: IWC(A.b) to K.p challenge					C: IWC(A.b) to S.a challenge					D: IWC(S.p) to S.p challenge
		Control	IWC(A. b)-7d			day	Control	IWC(K. p)			day	Control	IWC(S. a)			day	Control	IWC （S.p)
	2		1			3	1					Control	IWC(A. b)-7d			2	1	1
	2		1			3	1				1		1			2	1
	2		1			3	1				2		1			3	1
	2		1			3	1				2		1			4	1
	2		1			4		1			7		0			6	1
	2		1			5	1				7		0			7		0
	3		1			7		0			1	1				7		0
	3		1			7		0			1	1				7		0
	7		0			7		0			1	1				7		0
	7		0			7		0			1	1
	1	1									1	1
	1	1
	1	1
	1	1
	2	1
	2	1
	2	1
	2	1
	2	1
	2	1
